# Supplementary material for: Determinants of COVID-19 vaccine hesitancy and uptake in sub-Saharan Africa: a scoping review
Source: PubMed Central journal article supplement (PMC9676416; doi:10.1136/bmjopen-2022-066615), 2022-11-17
Supplement: bmjopen-2022-066615.draft_revisions.pdf [file bmjopen-2022-066615.draft_revisions.pdf]

# BMJ Open

BMJ Open is committed to open peer review. As part of this commitment we make the peer review history of every article we publish publicly available.

When an article is published we post the peer reviewers' comments and the authors' responses online. We also post the versions of the paper that were used during peer review. These are the versions that the peer review comments apply to.

The versions of the paper that follow are the versions that were submitted during the peer review process. They are not the versions of record or the final published versions. They should not be cited or distributed as the published version of this manuscript.

BMJ Open is an open access journal and the full, final, typeset and author-corrected version of record of the manuscript is available on our site with no access controls, subscription charges or pay-per-view fees (<http://bmjopen.bmj.com>).

If you have any questions on BMJ Open's open peer review process please email [info.bmjopen@bmj.com](mailto:info.bmjopen@bmj.com)

# BMJ Open

## Measuring determinants of COVID-19 vaccine uptake in sub-Saharan Africa: A scoping review

|                               |                                                                                                                                                                                                                                                                                                                                                                                                                    |
|-------------------------------|--------------------------------------------------------------------------------------------------------------------------------------------------------------------------------------------------------------------------------------------------------------------------------------------------------------------------------------------------------------------------------------------------------------------|
| Journal:                      | <i>BMJ Open</i>                                                                                                                                                                                                                                                                                                                                                                                                    |
| Manuscript ID                 | bmjopen-2022-066615                                                                                                                                                                                                                                                                                                                                                                                                |
| Article Type:                 | Original research                                                                                                                                                                                                                                                                                                                                                                                                  |
| Date Submitted by the Author: | 13-Jul-2022                                                                                                                                                                                                                                                                                                                                                                                                        |
| Complete List of Authors:     | Deml, Michael; University of Geneva, Institute of Sociological Research, Department of Sociology; University of Cape Town Faculty of Health Sciences, School of Public Health and Family Medicine, Division of Social and Behavioural Sciences<br>Githaiga, Jennifer; University of Cape Town Faculty of Health Sciences, School of Public Health and Family Medicine, Division of Social and Behavioural Sciences |
| Keywords:                     | COVID-19, PUBLIC HEALTH, EPIDEMIOLOGY, Infection control < INFECTIOUS DISEASES, Public health < INFECTIOUS DISEASES                                                                                                                                                                                                                                                                                                |
|                               |                                                                                                                                                                                                                                                                                                                                                                                                                    |

SCHOLARONE™  
Manuscripts

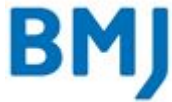

I, the Submitting Author has the right to grant and does grant on behalf of all authors of the Work (as defined in the below author licence), an exclusive licence and/or a non-exclusive licence for contributions from authors who are: i) UK Crown employees; ii) where BMJ has agreed a CC-BY licence shall apply, and/or iii) in accordance with the terms applicable for US Federal Government officers or employees acting as part of their official duties; on a worldwide, perpetual, irrevocable, royalty-free basis to BMJ Publishing Group Ltd ("BMJ") its licensees and where the relevant Journal is co-owned by BMJ to the co-owners of the Journal, to publish the Work in this journal and any other BMJ products and to exploit all rights, as set out in our [licence](#).

The Submitting Author accepts and understands that any supply made under these terms is made by BMJ to the Submitting Author unless you are acting as an employee on behalf of your employer or a postgraduate student of an affiliated institution which is paying any applicable article publishing charge ("APC") for Open Access articles. Where the Submitting Author wishes to make the Work available on an Open Access basis (and intends to pay the relevant APC), the terms of reuse of such Open Access shall be governed by a Creative Commons licence – details of these licences and which [Creative Commons](#) licence will apply to this Work are set out in our licence referred to above.

Other than as permitted in any relevant BMJ Author's Self Archiving Policies, I confirm this Work has not been accepted for publication elsewhere, is not being considered for publication elsewhere and does not duplicate material already published. I confirm all authors consent to publication of this Work and authorise the granting of this licence.

1  
2  
3 **Measuring determinants of COVID-19 vaccine uptake in sub-Saharan Africa: A**  
4 **scoping review**  
5

6 **Authors and Co-authors:**  
7

8 **Michael J. Deml\* <sup>1,2</sup> (corresponding author)**  
9

10 Postal address:

11 School of Public Health & Family Medicine  
12 Faculty of Health Sciences, University of Cape Town  
13 Falmouth Building, Anzio Road, Observatory, 7925

14 Email: [michaeljdeml@gmail.com](mailto:michaeljdeml@gmail.com)

15 Telephone: +27 21 406 6300

16 Fax: +27 21 406 6459  
17  
18

19 **Jennifer Nyawira Githaiga\* <sup>2</sup>**  
20

21 Postal address:

22 Division of Social and Behavioural Sciences  
23 School of Public Health & Family Medicine  
24 Faculty of Health Sciences, University of Cape Town  
25 Falmouth Building, Anzio Road, Observatory, 7925

26 Email: [Jennifer.githaiga@uct.ac.za](mailto:Jennifer.githaiga@uct.ac.za)

27 Telephone: +27 21 406 6300

28 Fax: +27 21 406 6459  
29  
30  
31

32 \*equal contribution

33 <sup>1</sup> University of Geneva, Institute of Sociological Research, Department of Sociology,  
34 Geneva, Switzerland

35 <sup>2</sup> University of Cape Town, Faculty of Health Sciences, School of Public Health and  
36 Family Medicine, Division of Social and Behavioural Sciences, Cape Town, South Africa  
37  
38

39 **Keywords:** COVID-19, vaccine hesitancy, scoping review, access, sub-Saharan Africa  
40

41 **Word count:** 5159  
42  
43  
44  
45  
46  
47  
48  
49  
50  
51  
52  
53  
54  
55  
56  
57  
58  
59  
60

1  
2  
3 **Measuring determinants of COVID-19 vaccine uptake in sub-Saharan Africa: A**  
4 **scoping review**  
5

6  
7 **ABSTRACT**  
8

9  
10 **Objective** To identify, describe and map the research tools used to measure COVID-19  
11 vaccine hesitancy, refusal, acceptance and access as these variables relate to COVID-  
12 19 vaccine uptake in sub-Saharan Africa.  
13  
14

15  
16  
17 **Design** Scoping review  
18

19 **Methods** In March 2022, we searched PubMed, Scopus, Web of Science, Cochrane,  
20 Academic Search Premier, MEDLINE, CINAHL, Health Source Nursing, Africa Wide and  
21 APA PsychInfo for peer-reviewed literature in English related to COVID-19 vaccine  
22 hesitancy, refusal, acceptance, and access in SSA. We used the Preferred Reporting  
23 Items for Systematic Reviews and Meta-Analyses extension (PRISMA) for Scoping  
24 Reviews to guide evidence gathering and as a template to present the evidence retrieval  
25 process.  
26  
27  
28  
29  
30  
31  
32  
33  
34

35 **Results** In the selected studies (n=72), which included a blend of cross-sectional studies,  
36 systematic reviews, mixed methods studies, qualitative studies and sentiment analysis,  
37 several measures were utilised to measure COVID-19 vaccine hesitancy, acceptance,  
38 and refusal. The pertinent measurements featured were *willingness* and *intent* to  
39 vaccinate from the perspectives of the general population, special population groups such  
40 as mothers, students and staff in academic institutions and healthcare workers, and  
41 *uptake* as a proxy for measuring assumed COVID-19 vaccine acceptance.  
42 Measurements of access to COVID-19 vaccination were cost and affordability,  
43 convenience, distance, and time to travel or time waiting for a vaccine, and (dis)comfort.  
44  
45  
46  
47  
48  
49  
50  
51  
52  
53  
54  
55  
56  
57  
58  
59  
60

1  
2  
3 Results underscored that though all studies measured COVID-19 vaccine hesitancy,  
4 acceptance, and refusal, relatively few studies (n=16, 22.2%) have included explicit  
5  
6 measurements of access to COVID-19 vaccination.  
7  
8  
9

10 **Conclusions** Future research on determinants of COVID-19 vaccination in sub-Saharan  
11 Africa and other low- and middle-income country (LMIC) settings needs to prioritize the  
12 inclusion of access-related variables. We recommend the development of standardized  
13  
14 research tools that can operationalize, measure, and disentangle the complex  
15  
16 determinants of vaccine uptake in future studies throughout sub-Saharan Africa and other  
17  
18 LMIC settings.  
19  
20  
21  
22  
23  
24  
25

## 26 **STRENGTHS AND LIMITATIONS OF THIS STUDY**

- 27  
28 • To our knowledge, this is the first scoping review seeking to identify, describe, and  
29 map measurement tools of COVID-19 vaccine hesitancy, refusal, and acceptance and  
30  
31 COVID-19 vaccine access in sub-Saharan Africa.  
32  
33
- 34  
35 • The methods allowed us to identify an important gap in COVID-19 vaccine research  
36 in sub-Saharan Africa by showing that relatively few studies have measured COVID-  
37  
38 19 vaccine access so far, especially in combination with vaccine hesitancy, refusal,  
39  
40 and acceptance.  
41  
42  
43
- 44  
45 • We make concrete suggestions for future research on determinants of COVID-19  
46 vaccine uptake that should: (1) be informed by previously established research study  
47  
48 concepts, models, and tools, (2) seek to use more standardized approaches to data  
49  
50 collection, (3) include study items designed to operationalize and measure access  
51  
52 issues related to COVID-19 vaccine acquisition, (4) be adaptable to capture the local  
53  
54  
55  
56  
57  
58  
59  
60

1  
2  
3 realities specific to the diverse contexts represented in sub-Saharan Africa and other  
4  
5 LMICs.

- 6  
7
- 8 • We chose not to include grey literature (conference proceedings, reports, opinion  
9  
10 pieces, commentaries.) and non-English language texts in our analysis, which may  
11  
12 have limited the data that was available to us.  
13
- 14

15  
16   
17 **INTRODUCTION**

18  
19 In 2019, the World Health Organization (WHO) listed *vaccine hesitancy* among 10 threats  
20  
21 to global health. Predating the advent of the COVID-19 pandemic, this announcement  
22  
23 defined vaccine hesitancy as “the reluctance or refusal to vaccinate despite the availability  
24  
25 of vaccines” and pointed to the complex issues underscoring why people might not get  
26  
27 vaccinated, such as “complacency, inconvenience in accessing vaccines, and lack of  
28  
29 confidence”<sup>1</sup>. Social and behavioral health scientists researching vaccine hesitancy and  
30  
31 *vaccine uptake*—whether people get vaccinated or not—have long been working on these  
32  
33 questions, with a systematic review from a global perspective arguing that that there is  
34  
35 no “universal algorithm” (p. 2155) and that the determinants of vaccine hesitancy are  
36  
37 complex, context-specific and vary across time, place, and vaccine<sup>2</sup>. A fundamental  
38  
39 message to adequately understand and address *under-immunization*, or vaccination  
40  
41 rates that do not meet public health targets, is that vaccine hesitancy as a determinant  
42  
43 for vaccine uptake needs to be disentangled from other determinants unrelated to  
44  
45 people’s reluctance to vaccinate. Bedford et al. 2018, for example, explain how hesitancy  
46  
47 can be “used inaccurately as the explanation for under-vaccination in a population when  
48  
49  
50  
51  
52  
53  
54  
55  
56  
57  
58  
59  
60

1  
2  
3 the causes are related to pragmatics, competing priorities, access, or the failure of  
4 services or policies” (p. 6656)<sup>3</sup>.  
5  
6

7  
8 Before the COVID-19 pandemic had begun, research on determinants of vaccine uptake  
9  
10 had typically been conducted in high-income countries (HICs) with developed healthcare  
11 systems and overall regular and dependable access to vaccination for eligible  
12 populations. Much of this research has focused on parental vaccine hesitancy and  
13 pointed to vaccine refusal in HICs as a privileged parenting practice, noting how parents  
14 who refuse vaccination count on having adequate access to medical care should their  
15 non- or under-vaccinated children fall ill from vaccine preventable diseases<sup>4-6</sup>. Other  
16 studies from HICs have pointed to some parents’ adherence to alternative conceptions of  
17 health, complementary medicine, and neoliberal parenting practices as influencing  
18 factors for vaccine hesitancy and vaccine refusal<sup>7-15</sup>. Some studies in these settings have  
19 particularly focused on the important roles healthcare professionals play in parents’  
20 vaccine decision-making process, citing children’s doctors as the most important and  
21 trusted source of vaccination information<sup>15-19</sup>.  
22  
23  
24  
25  
26  
27  
28  
29  
30  
31  
32  
33  
34  
35  
36

37  
38 Comparatively fewer social and behavioral vaccine attitude and uptake studies had been  
39 conducted in LMICs than in HICs before the COVID-19 pandemic. Such studies have  
40 tended to focus on lack of education, inequality, and access issues, rumors about  
41 vaccination, and ‘non-biomedical’ approaches to medicine in these countries as  
42 determinants of parents’ vaccination decisions<sup>20 21</sup>. However, research has been  
43 increasing in LMICs, with a particular focus on COVID-19 vaccine attitudes and uptake,  
44 both in anticipation of and following the arrival of safe and effective vaccines.  
45  
46  
47  
48  
49  
50  
51  
52  
53  
54  
55  
56  
57  
58  
59  
60



1  
2  
3 We here focus on sub-Saharan Africa (SSA), where healthcare systems are  
4 characterized by three distinctive features: (1) high disease burden, (2) inadequate  
5 resources, and (3) challenges related to leadership and governance. These three features  
6 influence public access to health care, including quality of service delivery, and how  
7 systems respond to mundane events and crises such as epidemic outbreaks. Firstly, SSA  
8 healthcare systems are not only strongly affected by a high burden of communicable  
9 diseases (e.g. HIV, tuberculosis, malaria, and diarrheal diseases), non-communicable  
10 diseases (e.g. heart disease, obesity, diabetes, and mental illness), maternal and child  
11 mortality, but also grapple with illnesses arising from climate change and environmental  
12 pollution and violence-related injuries both at interpersonal levels and in the context of  
13 conflict in fragile states <sup>22-24</sup>. Secondly, relative to healthcare systems in HICs, SSA  
14 healthcare systems are under-resourced with regards to health care workers, physical  
15 infrastructure and facilities, and financial resources with glaring disparities in access to  
16 health care based on geographical areas (rural vs. urban) and socio-economic strata <sup>22-  
17 24</sup>. A recent report on public health care in SSA indicated that 1 in 6 people live more than  
18 2 hours away from their nearest public hospital while 1 in 8 people live 1 hour or more  
19 away from their closest health center<sup>25</sup>. Thirdly, challenges related to leadership and  
20 governance stem from a combination of historical and political factors in post-  
21 independence countries as governments have sought to develop healthcare systems, a  
22 period characterized by health reforms and economic instability and subsequent  
23 structural adjustment sanctions introduced by international donors such as The World  
24 Bank and the International Monetary Fund<sup>26</sup>. Governments' inability to finance healthcare  
25 systems culminated in the growth of public-private partnerships (PPPs), where  
26  
27  
28  
29  
30  
31  
32  
33  
34  
35  
36  
37  
38  
39  
40  
41  
42  
43  
44  
45  
46  
47  
48  
49  
50  
51  
52  
53  
54  
55  
56  
57  
58  
59  
60

1  
2  
3 governments contract non-state providers to assist in health care provision as a means  
4 of expanding access to health care particularly in marginalized areas<sup>27</sup>.  
5  
6

7  
8 The COVID-19 pandemic and resulting mitigation measures have exacerbated existing  
9 healthcare system challenges, causing significant strain on the limited available  
10 resources, which has resulted in poor health outcomes. For instance, strict lockdowns in  
11 many SSA countries disrupted provision non-COVID related health services, led to loss  
12 of livelihoods and economic recession <sup>28 29</sup>, and low levels of trust in governments'  
13 responses to the crisis. Existing socio-economic disparities have served as barriers in  
14 adherence to COVID-19 prevention protocols<sup>29</sup>. An analysis of demographic health  
15 surveys in 16 SSA countries revealed that only 33.5% of households had water and soap  
16 available to support handwashing practices, with greater access in urban compared to  
17 rural areas<sup>30</sup>. For instance, approximately only 25% of South Africans from the poorest  
18 quintile and close to 40% of rural citizens had access to soap and water<sup>30</sup>. Similarly, in  
19 the context of abject poverty and food insecurity more so during the hard lockdown, the  
20 threat of COVID-19 has obscured socio-economic challenges<sup>31</sup>.  
21  
22  
23  
24  
25  
26  
27  
28  
29  
30  
31  
32  
33  
34  
35  
36

37 COVID-19 vaccination has featured prominently in discussions globally as well as in SSA.  
38 Scholars have noted that whereas such discussions have focused on procurement,  
39 supply and financing of vaccines<sup>32</sup>, there is a specific need for engagement with COVID-  
40 19 vaccine hesitancy, <sup>28 33</sup> and especially, a nuanced understanding of specific contexts  
41 and barriers to COVID-19 vaccine uptake given the existing evidence of varying rates of  
42 both vaccine hesitancy and uptake reported in various SSA countries<sup>33-37</sup>. Particularly,  
43 given the striking healthcare system disparities between HICs and LMICs, it is essential  
44 to understand the underlying determinants of COVID-19 vaccine uptake in a way that  
45  
46  
47  
48  
49  
50  
51  
52  
53  
54  
55  
56  
57  
58  
59  
60

1  
2  
3 allows for a nuanced distinction between uptake as it relates to vaccine attitudes and  
4 uptake as it relates to access issues.  
5  
6

7  
8 To our knowledge, limited research has so far attempted to disentangle COVID-19  
9 vaccine attitudes from COVID-19 vaccine access issues as determinants of COVID-19  
10 vaccine uptake in SSA. Therefore, this scoping review asks the following research  
11 question: *How have researchers operationalized and measured vaccine hesitancy and*  
12 *vaccine access as these variables relate to COVID-19 vaccine uptake in sub-Saharan*  
13 *Africa?*  
14  
15  
16  
17  
18  
19  
20

## 21 **METHODS**

22  
23 This scoping review was informed by Levac et al. 2010<sup>38</sup> version of Arksey and O'Malley's  
24 (2005) framework for scoping reviews<sup>39</sup> and the scoping review methodology of the  
25 Joanna Briggs Institute<sup>40 41</sup>. The Preferred Reporting Items for Systematic Reviews and  
26 Meta-Analyses extension (PRISMA) for Scoping Reviews<sup>42</sup> was utilized to guide evidence  
27 gathering and as a template to present the evidence retrieval process.  
28  
29  
30  
31  
32  
33  
34

### 35 **Objective**

36  
37 The primary objective of this scoping review was to identify, describe and map the  
38 operationalization and measurement of COVID-19 vaccine hesitancy, refusal,  
39 acceptance and access as these relate to COVID-19 vaccine uptake in SSA.  
40  
41  
42  
43

### 44 **Eligibility criteria**

#### 45 *Concept*

46  
47 Data sources with information on COVID-19 vaccination, vaccine hesitancy, acceptance,  
48 refusal, vaccine access, and/or vaccine uptake were included in this review. Studies that  
49  
50  
51  
52  
53  
54  
55  
56  
57  
58  
59  
60

1  
2  
3 did not include any of the listed thematic areas were excluded. Studies authored in  
4 English were included while all non-English articles were excluded.  
5  
6

### 7 *Context*

8  
9  
10 Articles included in this review were either fully or partially sub-Saharan African (SSA)  
11 based, for example, multi-country studies which included both SSA and non-SSA  
12 countries. All studies included were published during the COVID-19 pandemic. Non-SSA  
13 studies and pre-COVID studies were excluded.  
14  
15  
16  
17

### 18 *Types of evidence sources*

19  
20  
21 We included peer-reviewed, full-text journal articles comprising primary, empirical  
22 studies, and reviews. Qualitative, quantitative, and/or mixed methods studies were  
23 included. The following categories of sources were excluded: abstract only; full text not  
24 available; non-peer-reviewed articles; grey literature (conference proceedings, reports,  
25 opinion pieces, commentaries).  
26  
27  
28  
29  
30  
31

### 32 **Search strategy and study selection**

33  
34  
35 In March 2022, a research librarian from the and two study authors (MJD and JG)  
36 collaboratively developed and refined the search strategy to include the search terms  
37 related to “COVID-19” OR “coronavirus 2019” OR “SARS-CoV-2” OR “SARS-2” OR  
38 “severe acute respiratory syndrome coronavirus 2”, “vaccination hesitancy” OR “vaccine  
39 hesitancy” OR “vaccine refusal” OR “vaccination refusal” OR “vaccine access” OR  
40 “access” OR “sub-Saharan Africa.” We did not include a date filter as we expected that  
41 studies related to COVID-19 would be published during the period of the pandemic. A  
42 total of 10 databases were searched for relevant articles: PubMed, Scopus, Web of  
43 Science, Cochrane, Academic Search Premier, MEDLINE, Cumulative Index to Nursing  
44  
45  
46  
47  
48  
49  
50  
51  
52  
53  
54  
55  
56  
57  
58  
59  
60

1  
2  
3 and Allied Health Literature (CINAHL), Health Source Nursing, Africa Wide and APA  
4 PsychInfo. The search strategy was developed in with PubMed and adapted for use in  
5  
6 PsychInfo. The search strategy was developed in with PubMed and adapted for use in  
7  
8 the remaining nine databases. Articles from all 10 databases were exported to EndNote  
9  
10 and duplicates removed. MJD and JG manually searched reference lists of articles  
11  
12 retrieved from the databases for additional relevant articles. They then screened all  
13  
14 articles, removing duplicates undetected by EndNote and articles with content falling  
15  
16 outside of the scope of the review.  
17

18  
19 The process of abstract and title screening, based on the inclusion criteria, commenced  
20  
21 with both reviewers piloting CINAHL and APA Psychoinfo databases together.  
22  
23 Disagreements were discussed and resolved through consensus among authors. The  
24  
25 remaining articles and databases were then randomly divided into two and each of the  
26  
27 reviewers assigned one sub-set of articles for independent title and abstract screening.  
28  
29 All articles which met the inclusion criteria were selected for full text review. Some of the  
30  
31 articles selected for full review were excluded during full text review screening.  
32  
33

### 34 35 **Data extraction**

36  
37 Authors (MJD and JG) created a data extraction form and independently conducted pilot  
38  
39 data extraction on nine randomly selected articles. Following pilot data extraction, the  
40  
41 data extraction form was refined to include:  
42  
43

- 44 1) General descriptive data, namely the article reference number in EndNote, year of  
45 publication, author(s), publication title, aim, study population, country/countries  
46
- 47 2) Data on methods, such as types of studies, measurement scales and tools utilised  
48
- 49 3) Sociodemographic details of participants included in the selected studies  
50  
51  
52  
53  
54  
55  
56  
57  
58  
59  
60

- 1  
2  
3 4) Study measurement tools and operationalisation of vaccine hesitancy, vaccine  
4 acceptance, vaccine refusal, vaccine access, and vaccine uptake  
5  
6

### 7 **Patient and public involvement**

8  
9  
10 As this was a scoping review, it was not appropriate or possible to involve patients or the  
11 public in the design, or conduct, or reporting, or dissemination plans of our research.  
12  
13

### 14 **RESULTS**

15  
16  
17 A total of 3916 articles were retrieved from database searches in Academic Search  
18 Premier (n=558), Africa Wide (n=219), APA Psycinfo (n=64), CINAHL (n=127),  
19 Cochrane (n=0), Health Source Nursing (n=83), MEDLINE (n=873), PubMed (n=612),  
20 Scopus (n=1205), Web of Science (n=175). Additional articles were manually sourced  
21 from reference lists of articles from databases (n=10), yielding a grand total of 3926  
22 articles. Of these, 665 duplicate records were identified by EndNote and removed. The  
23 remaining 3261 articles were screened for eligibility and of these, 3151 articles were  
24 excluded. A total of 110 full text articles were sought for retrieval of which four were not  
25 available in full text. Of the 106 full text articles evaluated, 72 studies met the inclusion  
26 criteria and were included in this review. The study selection process is captured in a  
27 PRISMA flow diagram (Figure 1). The document “Supplementary materials 1” includes a  
28 list of the 72 studies reviewed in the scoping review.  
29  
30  
31  
32  
33  
34  
35  
36  
37  
38  
39  
40  
41  
42  
43

44 [Insert Figure 1: PRISMA Flow Diagram]

### 45 **Characteristics of studies included**

46  
47  
48 The 72 full text articles reviewed included comprised of cross-sectional studies (n=62),  
49 systematic reviews (n=4), qualitative studies (n=3), mixed methods studies (n=2), and  
50 sentiment analysis (n=1). The articles reviewed were comprised of data from 58 single  
51  
52  
53  
54  
55  
56  
57  
58  
59  
60

country studies and 14 multiple country studies. Of the 58 single country studies, 20 were from Ethiopia, 12 from Nigeria, 6 studies each from Ghana and South Africa, 2 studies each from Kenya, Zimbabwe, Democratic Republic of the Congo and Somalia, and 1 study each from Mozambique, Zambia, Togo and Cameroon (Table 1). A visual map of all the SSA countries featured in the 72 studies reviewed is presented in Figure 2.

**Table 1: Countries Featured in Reviewed Studies**

| Countries                        | Number of studies |
|----------------------------------|-------------------|
| Ethiopia                         | 20                |
| Nigeria                          | 12                |
| Ghana                            | 6                 |
| South Africa                     | 6                 |
| Uganda                           | 2                 |
| Kenya                            | 2                 |
| Zimbabwe                         | 2                 |
| Democratic Republic of the Congo | 2                 |
| Somalia                          | 2                 |
| Mozambique                       | 1                 |
| Zambia                           | 1                 |
| Togo                             | 1                 |
| Cameroon                         | 1                 |
| Multiple country studies*        | 14                |
| <b>Total</b>                     | <b>72</b>         |

\* Additional SSA countries featured in multiple-country studies were Angola, Benin, Burkina Faso, Cape Verde, Côte d'Ivoire, Gambia, Guinea, Guinea-Bissau, Lesotho, Malawi, Mali, Rwanda, São Tomé & Príncipe, Senegal, Sierra Leone, Sudan, and Tanzania.

**[Insert Figure 2: Countries Featured in Reviewed Studies]**

Study populations in the 72 reviewed studies comprised general adult populations (n=28), specific adult populations (n=21) including university students, schoolteachers, chronically ill persons, pregnant women, fully and partially vaccinated adults, mothers, adult caregivers, and informal traders, and healthcare workers (n=16). Others (n=7) combined two or more populations segments, for instance, schoolteachers and bank

1  
2  
3 workers in one study and program personnel, healthcare workers and community  
4 members in another. The main sociodemographic variables captured in the reviewed  
5 studies included age, sex, marital status, ethnicity, education, religion, residence,  
6 employment status, work category, general health status and, in a few instances, chronic  
7 illness status.  
8  
9

### 14 **Operationalization and measurements of vaccine hesitancy, vaccine acceptance,** 15 **and vaccine refusal** 16 17

18  
19 We identified different ways researchers operationalized and measured the outcome  
20 variables of vaccine hesitancy, vaccine acceptance, and vaccine refusal and grouped  
21 them into five categories: (1) measurements of willingness to vaccinate (n=32, 44.4%),  
22 (2) measurements of intention to vaccinate (n=26, 36.1%), (3) multiple measurements  
23 (n=7, 9.7%), (4) uptake measurements (n=4, 5.6%), and (5) qualitative approaches (n=3,  
24 4.2%). We describe these categories in further detail below. We do not provide additional  
25 details on operationalization of the uptake measurement because it is used as a proxy for  
26 measuring assumed COVID-19 vaccine acceptance in these studies<sup>43-46</sup>.  
27  
28  
29  
30  
31  
32  
33  
34  
35  
36

#### 37 *Willingness to vaccinate* 38

39  
40 The most frequently occurring operationalization of vaccine hesitancy, acceptance, and  
41 refusal was willingness to vaccinate against COVID-19 (n=32, 44.4%). Among these  
42 studies, 21 included items for which possible responses were “Yes,” “No,” or “Do not  
43 know/Unsure.” For example, Tobin et al. 2021 asked study respondents, “Would you be  
44 willing to accept a COVID-19 vaccine when one becomes available in the country?” (p.  
45 54)<sup>47</sup>. In six studies, researchers included Likert scale responses, such as Addo et al.  
46 2021 who asked, “How willing are you to take a COVID-19 vaccine?” (p. 5065)<sup>48</sup>. In four  
47  
48  
49  
50  
51  
52  
53  
54  
55  
56  
57  
58  
59  
60



1  
2  
3 studies, researchers added a cost-related condition to the item to measure participants'  
4 willingness to pay for a COVID-19 vaccine. Kanyanda et al. 2021, for instance, asked  
5 participants, "If an approved vaccine to prevent coronavirus was available right now at no  
6 cost, would you agree to be vaccinated?" (p. 2)<sup>49</sup>. In one study, researchers asked  
7 participants if they would be willing to take the COVID-19 vaccine if it was recommended  
8 by a health worker or health agency<sup>50</sup>.  
9

### 16 *Intention to vaccinate*

17  
18 We identified intention to vaccinate as a measurement of vaccine hesitancy, acceptance,  
19 and refusal in 26 (36.1%) of the 72 studies. Among these, 13 included responses for  
20 which possible responses were "Yes," "No," or "Do not know/Unsure." For instance,  
21 Abebe et al. 2021 asked respondents, "Did you have an intention to accept COVID-19  
22 vaccine if it is available in the future?" (p. 2018)<sup>51</sup>. In 10 studies, researchers included  
23 Likert scale responses. For example, Wiysonge et al. 2022 asked study participants to  
24 rate their level of agreement on a scale from 1 to 7 (1=strongly disagree, 7=strongly  
25 agree) for the statement "I will take the COVID-19 vaccine when one becomes available"  
26 (p. 3)<sup>52</sup>. Researchers included cost-related conditions to measure participants' intention  
27 to vaccinate in 2 studies, including Mekonnen et al. 2022 who asked, "Are you intending  
28 to get vaccinated against COVID-19 if available without any cost?" (p. 3)<sup>53</sup>.  
29  
30

### 33 *Multiple measurements*

34  
35 Seven studies (9.7%) included multiple measurements to operationalize vaccine  
36 hesitancy, acceptance, and refusal. Chinawi et al. 2021 measured mothers' willingness  
37 to receive the COVID-19 vaccination as well as their willingness to vaccinate their children  
38 with the COVID-19 vaccine<sup>54</sup>. Yilma et al. 2022 asked healthcare workers in Ethiopia if  
39  
40  
41  
42  
43  
44  
45  
46  
47  
48  
49  
50  
51  
52  
53  
54  
55  
56  
57  
58  
59  
60

1  
2  
3 they would get vaccinated if a COVID-19 vaccine was available and proven safe and  
4 effective, and if they would recommend their patients to get vaccinated for COVID-19<sup>55</sup>.  
5  
6 Sallam 2021<sup>33</sup> conducted a concise systematic review of vaccine acceptance rates and  
7  
8 classified acceptance by considering intention to accept, likelihood of vaccination,  
9  
10 willingness to accept a vaccine, endorsement of Oxford Scale<sup>56</sup>, and level of agreement  
11  
12 with vaccination acceptance. In a pre-vaccination rollout survey in Ghana, Alhassan et al.  
13  
14 2021 measured respondents' willingness to participate in a COVID-19 vaccine trial and  
15  
16 their willingness to take the vaccine. The three remaining studies used multiple items to  
17  
18 operationalize vaccine sentiment<sup>57</sup> and vaccine acceptance<sup>58 59</sup> but did not explicitly  
19  
20 describe the procedure in full detail.  
21  
22  
23  
24  
25

### 26 *Qualitative approaches*

27  
28 Three studies (4.7%) employed qualitative approaches. Wonodi et al. 2022 conducted  
29  
30 focus group discussions and key informant interviews to elicit and thematically analyze  
31  
32 COVID-19 vaccine conspiracy theories and misinformation, which they contended may  
33  
34 result in “highly disruptive vaccine hesitancy and refusal” (p. 2115)<sup>60</sup>. Shiferie et al. 2021  
35  
36 used WHO's SAGE working group definition of vaccine hesitancy (“delay in acceptance  
37  
38 or refusal of vaccination despite availability of vaccination services” (p. 4163)<sup>61</sup>) in their  
39  
40 analysis of 20 qualitative interviews with healthcare providers<sup>62</sup>. In their analysis of  
41  
42 documentary, social media and policy analysis, participant observation, ethnography  
43  
44 involving informal interviews, and observations, Leach et al. 2022<sup>63</sup> used the Vaccine  
45  
46 Anxieties Framework<sup>20</sup> and argued that it allows for “exploration of who, in which contexts,  
47  
48 really does want Covid vaccines, and may be worried about not getting them” (p. 2).  
49  
50  
51  
52  
53

### 54 **Operationalizations and measurements of access to COVID-19 vaccination**

1  
2  
3 Out of the 72 reviewed studies, 16 (22.2%) included operationalizations of access issues  
4 related to obtaining COVID-19 vaccines. We grouped these operationalizations into 5  
5 categories: (1) measurements of cost and affordability (n=13, 18.1%), (2) measurements  
6 of convenience (n=6, 8.3%), (3) measurements of distance or time to travel or time waiting  
7 for a vaccine (n=3, 4.2%), (4) measurements of comfort (n=1, 1.4%), and (5) qualitative  
8 approaches (n=1, 1.4%). Of these 16 studies, 9 included measurements of access from  
9 more than 1 of these categories.

### 19 *Cost and affordability*

21 For the measurements of cost and affordability category, 8 of the 13 studies included only  
22 a cost and affordability measurement as an operationalization of access. The other 5  
23 included additional access items that fell into the other categories. Some of these cost  
24 and affordability questions were the same questions discussed above in the willingness  
25 and intention to vaccinate measurements (i.e. “If an approved vaccine to prevent  
26 coronavirus was available right now at no cost, would you agree to be vaccinated” (p.  
27 2)<sup>49</sup>). Others asked questions about preferences for free vaccines or asked participants  
28 to indicate how much they would be willing to pay for a vaccine. Anjorin et al. 2021, for  
29 example, asked participants to indicate their level of agreement with the following  
30 statement: “If there is a vaccine available for coronavirus, I believe it should be free” (S1  
31 File)<sup>63</sup>. The same researchers provided the statement, “I consider [----] to be a reasonable  
32 price range for the coronavirus vaccine” to participants and asked them to choose from  
33 the following options: (1) \$1-3, (2) \$4-6, (3) \$7-9, (4) ≥ \$10 (S1 File).

### 51 *Convenience*

1  
2  
3 We found measurements of convenience as they relate to COVID-19 vaccine acquisition  
4 in 6 studies. Three of these studies asked respondents about general difficulty in  
5 accessing vaccination sites. For instance, Orangi et al. 2021 asked if participants found  
6 vaccination sites hard to access<sup>64</sup>. Katoto et al. 2022 conducted a study in South Africa  
7 and asked respondents about their ability to access to the online vaccine registration  
8 platform, which has implications for vaccine access pragmatics<sup>65</sup>. Wiysonge et al. 2022  
9 asked participants about their level of agreement with the statement, “For me, it is  
10 inconvenient to receive vaccinations against Covid-19” (p. 3)<sup>52</sup>. Anjorin et al. 2021 asked  
11 respondents if they would prefer community workers to come to their house or place of  
12 work to give the coronavirus vaccine, as opposed to going to a health center (S1 File)<sup>63</sup>.  
13  
14  
15  
16  
17  
18  
19  
20  
21  
22  
23  
24  
25

#### 26 *Distance and time to travel or time waiting for a vaccine*

27  
28 Three studies in total included items about distance/time to travel or time waiting for a  
29 vaccine. Davis et al. 2022 explain how “self-reported distance and waiting times in queue  
30 were used as a means of measuring perceived access to vaccine” (p. 12)<sup>58</sup>. Tobin et al.  
31 asked respondents if they were willing to travel for more than one hour to get a COVID-  
32 19 vaccine<sup>47</sup>. Anjorin et al. 2021 ask two similar questions about typical travel time to  
33 nearest health centers and the amount of time participants would be willing to travel to  
34 get the coronavirus vaccine<sup>63</sup>.  
35  
36  
37  
38  
39  
40  
41  
42  
43

#### 44 *Comfort*

45  
46 One study included a question about comfort as a measurement related to COVID-19  
47 vaccine access. Wiysonge et al. 2022 asked participants about their level of agreement  
48 with the statement “Visiting the vaccination clinic will make me feel uncomfortable; this  
49 will keep me from getting vaccinated against Covid-19” (p. 3)<sup>52</sup>.  
50  
51  
52  
53  
54  
55  
56  
57  
58  
59  
60

### *Qualitative approaches*

One of the 72 studies included qualitative approaches to operationalize COVID-19 vaccine access. In this study, Leach et al. 2022 posit a link between vaccine-related anxiety and access to vaccines based on the availability and equity of resources and observe how the issue of vaccine access is more intricate and unpredictable than presented in ongoing global debates about vaccination<sup>66</sup>.

### **Identified gaps**

The results of this scoping review allowed us to identify gaps in the current research on COVID-19 vaccine hesitancy, vaccine acceptance, vaccine refusal, and vaccine access in sub-Saharan Africa. We have identified three main gaps in this research: (1) a small proportion of studies investigating issues of COVID-19 vaccine access as determinants of COVID-19 vaccine uptake, (2) a lack of standardized, homogeneous approaches to measuring COVID-19 vaccine hesitancy, vaccine acceptance, vaccine refusal, and vaccine access, and (3) a lack of country-wide representative studies.

A major gap in the literature became clear when we considered the surprisingly low number of studies (n=16, 22.2%) that included study items aimed at measuring COVID-19 vaccine access. Almost all of these studies included measurements related to cost and affordability of the vaccine, while very few considered obstacles individuals might face as barriers to receiving a COVID-19 vaccine, such as accessing online vaccine registration platforms, travel distance and waiting times to reach vaccination centers or sites, and comfort when visiting vaccination clinics.

We also identified heterogeneous research approaches to measuring vaccine hesitancy, acceptance, refusal, and uptake. The variety of approaches used by researchers

1  
2  
3 throughout SSA likely reflects the difficulties involved when attempting to operationalize  
4 admittedly complex phenomena. Similarly, the use of a variety of tools and measurements  
5 renders cross-country comparison challenging.  
6  
7  
8  
9

10 Results of this scoping review also showed that there were relatively few studies that  
11 made attempts to provide country-wide, representative results. Rather, many studies  
12 were institution-based, convenience samples or included non-random samples via  
13 questionnaires conducted online.  
14  
15  
16  
17  
18  
19  
20

## 21 **DISCUSSION**

22  
23 Research on COVID-19 vaccine hesitancy, acceptance, refusal, and uptake in sub-  
24 Saharan Africa has been heterogeneous in terms of study sample populations, study  
25 settings, study designs, and measurement tools. This is not surprising given the fast-  
26 changing nature of the COVID-19 pandemic combined with the urgent and complex mass  
27 vaccination rollout efforts designed to immunize the highest number of eligible individuals  
28 possible in resource-limited settings. This scoping review has described the diversity of  
29 this research and showed that a considerable amount of research has focused on  
30 measuring COVID-19 vaccine hesitancy, acceptance, and refusal, whereas few of these  
31 studies have included explicit measurements of access to COVID-19 vaccination.  
32  
33  
34  
35  
36  
37  
38  
39  
40  
41  
42  
43

44 We argue that some of the above-mentioned gaps are likely a result, in part, of the  
45 reviewed studies' overall limited engagement with and use of research tools and  
46 measurement scales which pre-dated the COVID-19 pandemic. Further consideration of  
47 these sources in the study design process would likely have allowed researchers to  
48  
49  
50  
51  
52  
53  
54  
55  
56  
57  
58  
59  
60

1  
2  
3 address some of these gaps, as their research could have been informed by models  
4 designed to measure the complexities around vaccination decision-making and uptake.  
5

6  
7 Several studies did, nonetheless, engage with literature and models pre-existing the  
8 COVID-19 pandemic and have adapted them for use for studying the COVID-19  
9  
10 pandemic and vaccination. Anjorin et al. 2021<sup>63</sup>, for example, reference a 2014 WHO  
11  
12 Strategic Advisory Group of Experts on Immunization (SAGE) report<sup>67</sup>, describing the  
13  
14 “3Cs Model” which includes the concepts of *confidence*, *complacency*, and *convenience*.  
15  
16 Anjorin et al. 2021’s utilization of the 3Cs model likely prompted them to include items  
17  
18 designed to measure variables related to COVID-19 vaccine access, notably through use  
19  
20 of the concept *convenience*.  
21  
22  
23  
24  
25

26 Wiysonge, et al. <sup>52</sup> explicitly stated how the study questionnaire was informed by the 5C  
27  
28 scale from Betsch et al. 2018 <sup>68</sup>, which is an adaptation of SAGE’s 3Cs model. The 5C  
29  
30 scale measures five psychological antecedents of vaccination: *confidence*, *complacency*,  
31  
32 *constraints*, *rational calculations of pros and cons*, and *collective responsibility*. Wiysonge  
33  
34 et al.’s use of the 5C scale allowed for the inclusion of a multitude of questions related to  
35  
36 intention to vaccinate against COVID-19, convenience of getting vaccinated, and comfort  
37  
38 in going to vaccination clinics, among others.  
39  
40  
41

42 Katoto et al. 2022 used the WHO and United Nations Children’s Fund (UNICEF)’s  
43  
44 Behavioral Social Drivers of COVID-19 vaccination (BeSD) tool<sup>69</sup> to inform the  
45  
46 development of data collection tools for their study. The BeSD tool assesses four domains  
47  
48 related to vaccine uptake: (1) what people think and feel about vaccinations, (2) social  
49  
50 processes promoting or hindering vaccination, (3) individual motivations to seek  
51  
52 vaccination, and (4) practical elements involved in obtaining and getting immunization.  
53  
54  
55  
56  
57  
58  
59  
60

1  
2  
3 Katoto et al. 2022 note that the BeSD has limited use in LMICs, which prompted the  
4 research team to extensively adapt the tool for the South African context. Nonetheless,  
5 use of the BeSD tool in the study design allowed researchers to include an item related  
6 to practical elements involved in obtaining and getting immunization: access to the online  
7 vaccine registration platform.  
8  
9

10  
11  
12 Regarding our study objective to identify, describe, and map research measurement tools  
13 COVID-19 vaccine hesitancy, refusal, and acceptance and COVID-19 vaccine access as  
14 they relate to COVID-19 vaccine uptake in sub-Saharan Africa, our results show that all  
15 72 studies included measurements of vaccine hesitancy, refusal, and/or acceptance.  
16 However, only 16 (22%) studies included at least one measurement of COVID-19 vaccine  
17 access. This important finding aligns with a trend developed during the COVID-19  
18 pandemic whereby journalists, governments, policymakers, and researchers have  
19 increasingly used 'vaccine hesitancy' as an explanation for why so many people remain  
20 unvaccinated, even in contexts where there are inadequate vaccine supplies or difficulties  
21 accessing vaccination services<sup>70</sup>. In effect, Attwell et al. 2022 observed that papers  
22 mentioning 'vaccine' or 'vaccination' in the title, as well as 'hesitancy,' increased from  
23 3.3% in 2019 to 8.31% in 2021 (p.574). These authors argue that this increased focus on  
24 vaccine hesitancy "lets governments off the hook" by centering "too much of the  
25 responsibility for the success (or not) of a vaccination programme on individuals" (ibid).  
26  
27 Future research on the topic of COVID-19 vaccination in sub-Saharan Africa, and other  
28 LMIC settings for that matter, needs to prioritize the inclusion of access-related  
29 measurements. Inclusion of access variables in future research will add an essential  
30 factor to the complex equation around determinants of vaccine uptake. More importantly,  
31  
32  
33  
34  
35  
36  
37  
38  
39  
40  
41  
42  
43  
44  
45  
46  
47  
48  
49  
50  
51  
52  
53  
54  
55  
56  
57  
58  
59  
60



1  
2  
3 its inclusion will fill a current empirical blind spot around COVID-19 vaccine research in  
4 sub-Saharan Africa whose results have potential to provide insights into concrete,  
5 pragmatic, and actionable changes designed to make it easier for individuals to obtain  
6 COVID-19 vaccines from a health systems perspective.  
7  
8  
9  
10

## 11 **CONCLUSION**

12 This scoping review has described the heterogeneity in 72 reviewed studies about  
13 COVID-19 vaccine hesitancy, acceptance, refusal, and access in sub-Saharan Africa.  
14 This heterogeneity was apparent in the distribution of countries included, the study  
15 designs, sample populations, measurements of vaccine hesitancy, acceptance, refusal,  
16 uptake, and access. Particularly, we have identified an important empirical blind spot in  
17 the literature regarding measurements of vaccine access. Looking forward, future  
18 measurement tools can find inspiration from pre-existing scales, tools, and models used  
19 for the study of the determinants of vaccine uptake<sup>61 67-69</sup>, as was demonstrated in several  
20 of the 72 studies reviewed in this scoping review. These research tools should  
21 nonetheless be adaptable to capture the local realities specific to the diverse contexts  
22 represented in sub-Saharan Africa and other LMICs.  
23  
24  
25  
26  
27  
28  
29  
30  
31  
32  
33  
34  
35  
36  
37  
38  
39  
40  
41

42 **Acknowledgments** We would like to acknowledge the financial supported received from  
43 the Leading House Africa Research Partnership Grant I and from the Swiss National  
44 Science Foundation's sponsorship of MJD's Early Postdoc.Mobility Fellowship (Grant:  
45 200180). We would like to thank Nahmla Madini who provided invaluable assistance and  
46 support through her role as a librarian at the University of Cape Town's Bongani Mayosi  
47  
48  
49  
50  
51  
52  
53  
54  
55  
56  
57  
58  
59  
60

1  
2  
3 Health Sciences Library. Finally, we would like to thank Vladimir Jolidon and Lucia Knight  
4  
5 for their valuable inputs for revisions of the scoping review.  
6

### 7 **Collaborators**

8  
9  
10 Vladimir Jolidon

11  
12 Lucia Knight

### 13 **Contributors**

14  
15  
16  
17 Both authors worked together in sourcing funding for this project, conceptualizing and  
18  
19 designing the study, data collection and analysis, preparation, review and editing the  
20  
21 manuscript. Both authors read and approved the final version of the manuscript for  
22  
23 submission.  
24

25  
26 **Funding** This work was supported by the Leading House Africa Research Partnership  
27  
28 Grant I and by the Swiss National Science Foundation's sponsorship of MJD's Early  
29  
30 Postdoc.Mobility Fellowship (Grant: 200180).  
31

32  
33 **Competing interests** None to declare.  
34

35 **Patient and public involvement** Patients were not involved in this study.  
36

37 **Patient consent for publication** Patients were not involved in this study.  
38

39  
40 **Ethics approval** This study was based entirely on a scoping review of relevant  
41  
42 published literature and did not require an ethics approval.  
43

44 **Provenance and peer review** Not commissioned. Externally peer reviewed.  
45

46  
47 **Data availability statement** Data supporting the findings of this study are available from  
48  
49 the corresponding author (MJD) on request.  
50

51 **Supplementary material** The document "Supplementary materials 1" includes a list of  
52  
53 the 72 studies reviewed in the scoping review.  
54  
55  
56  
57  
58  
59

## REFERENCES

1. WHO. Ten threats to global health in 2019 2019 [Available from: <https://www.who.int/emergencies/ten-threats-to-global-health-in-2019> accessed February 18, 2019 2019.
2. Larson H, Jarrett C, Eckersberger E, et al. Understanding vaccine hesitancy around vaccines and vaccination from a global perspective: A systematic review of published literature, 2007–2012. *Vaccine* 2014;32 doi: 10.1016/j.vaccine.2014.01.081
3. Bedford H, Attwell K, Danchin M, et al. Vaccine hesitancy, refusal and access barriers: The need for clarity in terminology. *Vaccine* 2018;36(44):6556-58. doi: <https://doi.org/10.1016/j.vaccine.2017.08.004>
4. Reich JA. Neoliberal Parenting, Future Sexual Citizens, and Vaccines Against Sexual Risk. *Sexuality Research and Social Policy* 2016;13(4):341-55. doi: 10.1007/s13178-016-0227-z
5. Reich JA. *Calling the Shots: Why Parents Reject Vaccines*. New York: New York University Press 2016.
6. Reich JA. Neoliberal Mothering and Vaccine Refusal: Imagined Gated Communities and the Privilege of Choice. *Gender & Society* 2014;28(5):679-704. doi: 10.1177/0891243214532711
7. Sobo EJ. Social Cultivation of Vaccine Refusal and Delay among Waldorf (Steiner) School Parents. *Medical Anthropology Quarterly* 2015;29(3):381-99. doi: 10.1111/maq.12214
8. Sobo EJ. Salutogenic Education? Movement and Whole Child Health in a Waldorf (Steiner) School. *Medical Anthropology Quarterly* 2015;29(2):137-56. doi: 10.1111/maq.12140
9. Sobo EJ. THEORIZING (VACCINE) REFUSAL: Through the Looking Glass. *Cultural Anthropology* 2016;31(3):342-50. doi: 10.14506/ca31.3.04
10. Sobo EJ, Huhn A, Sannwald A, et al. Information Curation among Vaccine Cautious Parents: Web 2.0, Pinterest Thinking, and Pediatric Vaccination Choice. *Medical Anthropology* 2016;35(6):529-46. doi: 10.1080/01459740.2016.1145219
11. Ward PR, Attwell K, Meyer SB, et al. Understanding the perceived logic of care by vaccine-hesitant and vaccine-refusing parents: A qualitative study in Australia. *PloS one* 2017;12(10):e0185955-e55. doi: 10.1371/journal.pone.0185955
12. Attwell K, Meyer SB, Ward PR. The Social Basis of Vaccine Questioning and Refusal: A Qualitative Study Employing Bourdieu's Concepts of 'Capitals' and 'Habitus'. *International journal of environmental research and public health* 2018;15(5):1044. doi: 10.3390/ijerph15051044
13. Attwell K, Smith DT, Ward PR. 'The Unhealthy Other': How vaccine rejecting parents construct the vaccinating mainstream. *Vaccine* 2018;36(12):1621-26. doi: <https://doi.org/10.1016/j.vaccine.2018.01.076>
14. Attwell K, Ward PR, Meyer SB, et al. "Do-it-yourself": Vaccine rejection and complementary and alternative medicine (CAM). *Social Science & Medicine* 2018;196:106-14. doi: <https://doi.org/10.1016/j.socscimed.2017.11.022>
15. Deml MJ, Buhl A, Huber BM, et al. Trust, affect, and choice in parents' vaccination decision-making and health-care provider selection in Switzerland. *Sociology of Health & Illness* 2021;n/a:1-18. doi: <https://doi.org/10.1111/1467-9566.13388>

16. Deml MJ, Buhl A, Notter J, et al. 'Problem patients and physicians' failures': What it means for doctors to counsel vaccine hesitant patients in Switzerland. *Social Science & Medicine* 2020;255:112946. doi: <https://doi.org/10.1016/j.socscimed.2020.112946>
17. Deml MJ, Jafflin K, Merten S, et al. Determinants of vaccine hesitancy in Switzerland: study protocol of a mixed-methods national research programme. *BMJ Open* 2019;9(11):e032218. doi: 10.1136/bmjopen-2019-032218
18. Ebi SJ, Deml MJ, Jafflin K, et al. Parents' vaccination information seeking, satisfaction with and trust in medical providers in Switzerland: a mixed-methods study. *BMJ Open* 2022;12(2):e053267. doi: 10.1136/bmjopen-2021-053267
19. Benin AL, Wisler-Scher DJ, Colson E, et al. Qualitative analysis of mothers' decision-making about vaccines for infants: the importance of trust. *American Academy of Pediatrics* 2006;117(5):1532-41.
20. Leach M, Fairhead J. *Vaccine Anxieties: Global Science, Child Health and Society*. Oxfordshire: Routledge 2007:216.
21. Larson H. *Stuck: How Vaccine Rumors Start—and Why They Don't Go Away*. Seattle: Oxford University Press 2020:184.
22. Agyepong IA, Sewankambo N, Binagwaho A, et al. The path to longer and healthier lives for all Africans by 2030: the Lancet Commission on the future of health in sub-Saharan Africa. *The Lancet* 2017;390(10114):2803-59.
23. Mash R, Howe A, Olayemi O, et al. Reflections on family medicine and primary healthcare in sub-Saharan Africa: *BMJ Specialist Journals*, 2018.
24. TheEconomist. *The future of healthcare in Africa*: Health Systems Trust, 2011.
25. Falchetta G, Hammad AT, Shayegh S. Planning universal accessibility to public health care in sub-Saharan Africa. *Proceedings of the National Academy of Sciences* 2020;117(50):31760-69.
26. Streefland P. Public health care under pressure in sub-Saharan Africa. *Health Policy* 2005;71(3):375-82.
27. Whyte E, Olivier J. Models of engagement between the state and the faith sector in sub-Saharan Africa—a systematic review. *Development in Practice* 2017;27(5):684-97.
28. Dzinamarira T, Nachipo B, Phiri B, et al. COVID-19 vaccine roll-out in South Africa and Zimbabwe: urgent need to address community preparedness, fears and hesitancy. *Vaccines* 2021;9(3):250.
29. Hartwig R, Hoffmann L. *Challenging Trust in Government: COVID in sub-Saharan Africa*. 2021
30. Jiwani SS, Antiporta DA. Inequalities in access to water and soap matter for the COVID-19 response in sub-Saharan Africa. *International journal for equity in health* 2020;19:1-3.
31. Powell A. Rural COVID, urban COVID. Africa sees sharp divide. *Voice of America News Online* 2021 21 March 2021.
32. Basak P, Abir T, Al Mamun A, et al. A Global Study on the Correlates of Gross Domestic Product (GDP) and COVID-19 Vaccine Distribution. *Vaccines* 2022;10(2) doi: 10.3390/vaccines10020266
33. Sallam M. COVID-19 vaccine hesitancy worldwide: a concise systematic review of vaccine acceptance rates. *Vaccines* 2021;9(2):160.

34. Acheampong T, Akorsikumah EA, Osaekwapon J, et al. Examining Vaccine Hesitancy in sub-Saharan Africa: A Survey of the Knowledge and Attitudes among Adults to Receive COVID-19 Vaccines in Ghana. *Vaccines* 2021;9(8):814.
35. Dinga JN, Sinda LK, Titanji VP. Assessment of vaccine hesitancy to a COVID-19 vaccine in Cameroonian adults and its global implication. *Vaccines* 2021;9(2):175.
36. Tulloch O, Roldan de Jong T, Bardosh K. Data Synthesis: COVID-19 Vaccine Perceptions in sub-Saharan Africa: Social and Behavioural Science Data, March 2020-April 2021. 2021
37. Nachega JB, Sam-Agudu NA, Masekela R, et al. Addressing challenges to rolling out COVID-19 vaccines in African countries. *Lancet Glob Health* 2021;9(6):e746-e48. doi: 10.1016/s2214-109x(21)00097-8 [published Online First: 2021/03/14]
38. Levac D, Colquhoun H, O'Brien KK. Scoping studies: advancing the methodology. *Implementation Science* 2010;5(1):69. doi: 10.1186/1748-5908-5-69
39. Arksey H, O'Malley L. Scoping studies: towards a methodological framework. *International Journal of Social Research Methodology* 2005;8(1):19-32. doi: 10.1080/1364557032000119616
40. MDJ P, C M, AC T, et al. Updated methodological guidance for the conduct of scoping reviews: JBI evidence implementation 2021:3-10.
41. Peters MD, Godfrey C, McInerney P, et al. Chapter 11: Scoping reviews. In: Aromataris E MZ, ed. *JBI Manual for Evidence Synthesis*: JBI 2020.
42. Page MJ, McKenzie JE, Bossuyt PM, et al. The PRISMA 2020 statement: an updated guideline for reporting systematic reviews. *BMJ* 2021;372:n71. doi: 10.1136/bmj.n71
43. Al-Mustapha AI, Abubakar MI, Oyewo M, et al. Socio-Demographic Characteristics of COVID-19 Vaccine Recipients in Kwara State, North Central Nigeria. *Frontiers in Public Health* 2022;9 doi: 10.3389/fpubh.2021.773998
44. Rikitu Terefa D, Shama AT, Feyisa BR, et al. COVID-19 Vaccine Uptake and Associated Factors Among Health Professionals in Ethiopia. *Infection and drug resistance* 2021;14:5531-41. doi: 10.2147/IDR.S344647
45. Murewanhema G, Burukai TV, Chireka B, et al. Implementing national COVID-19 vaccination programmes in sub-Saharan Africa- early lessons from Zimbabwe: a descriptive cross-sectional study. *Pan Afr Med J* 2021;40:180. doi: 10.11604/pamj.2021.40.180.30824 [published Online First: 2022/01/13]
46. Agha S, Chine A, Lalika M, et al. Drivers of COVID-19 Vaccine Uptake amongst Healthcare Workers (HCWs) in Nigeria. *Vaccines* 2021;9(10) doi: 10.3390/vaccines9101162
47. Tobin EA, Okonofua M, Adeke A, et al. Willingness to accept a COVID-19 vaccine in Nigeria: a population-based cross-sectional study. *Cent Afr J Public Health* 2021;7(2):53.
48. Addo PC, Kulbo NB, Sagoe KA, et al. Guarding against COVID-19 vaccine hesitance in Ghana: analytic view of personal health engagement and vaccine related attitude. *Hum Vaccin Immunother* 2021;17(12):5063-68. doi: 10.1080/21645515.2021.2008729 [published Online First: 2021/12/15]
49. Kanyanda S, Markhof Y, Wollburg P, et al. Acceptance of COVID-19 vaccines in sub-Saharan Africa: evidence from six national phone surveys. *BMJ Open* 2021;11(12):e055159. doi: 10.1136/bmjopen-2021-055159 [published Online First: 2021/12/17]
50. Eze UA, Ndoh KI, Ibisola BA, et al. Determinants for Acceptance of COVID-19 Vaccine in Nigeria. *Cureus* 2021;13(11):e19801. doi: 10.7759/cureus.19801

- 1
  - 2
  - 3
  - 4
  - 5
  - 6
  - 7
  - 8
  - 9
  - 10
  - 11
  - 12
  - 13
  - 14
  - 15
  - 16
  - 17
  - 18
  - 19
  - 20
  - 21
  - 22
  - 23
  - 24
  - 25
  - 26
  - 27
  - 28
  - 29
  - 30
  - 31
  - 32
  - 33
  - 34
  - 35
  - 36
  - 37
  - 38
  - 39
  - 40
  - 41
  - 42
  - 43
  - 44
  - 45
  - 46
  - 47
  - 48
  - 49
  - 50
  - 51
  - 52
  - 53
  - 54
  - 55
  - 56
  - 57
  - 58
  - 59
  - 60
51. Abebe H, Shitu S, Mose A. Understanding of COVID-19 vaccine knowledge, attitude, acceptance, and determinates of COVID-19 vaccine acceptance among adult population in Ethiopia. *Infection and drug resistance* 2021;14:2015.
52. Wiysonge CS, Alobwede SM, Katoto PDC, et al. COVID-19 vaccine acceptance and hesitancy among healthcare workers in South Africa. *Expert Review of Vaccines* 2022 doi: 10.1080/14760584.2022.2023355
53. Kassa Mekonnen C, Gizaw Demissie N, Wako Beko Z, et al. Intent to get vaccinated against COVID-19 pandemic and its associated factors among adults with a chronic medical condition. *Int J Afr Nurs Sci* 2022;16:100401. doi: 10.1016/j.ijans.2022.100401 [published Online First: 2022/03/01]
54. Chinawa AT, Chinawa JM, Ossai EN, et al. Maternal level of awareness and predictors of willingness to vaccinate children against COVID 19; A multi-center study. *Human Vaccines and Immunotherapeutics* 2021;17(11):3982-88. doi: 10.1080/21645515.2021.1963172
55. Yilma D, Mohammed R, Getahun Abdela S, et al. COVID-19 vaccine acceptability among health care workers in Ethiopia: Do we practice what we preach? *Trop Med Int Health* 2022 doi: 10.1111/tmi.13742 [published Online First: 2022/03/02]
56. Daley MF, Narwaney KJ, Shoup JA, et al. Addressing Parents' Vaccine Concerns: A Randomized Trial of a Social Media Intervention. *American Journal of Preventive Medicine* 2018;55(1):44-54. doi: <https://doi.org/10.1016/j.amepre.2018.04.010>
57. Ansari MTJ, Khan NA. Worldwide COVID-19 vaccines sentiment analysis through twitter content. *Electronic Journal of General Medicine* 2021;18(6) doi: 10.29333/ejgm/11316
58. Davis TP, Jr., Yimam AK, Kalam MA, et al. Behavioural Determinants of COVID-19-Vaccine Acceptance in Rural Areas of Six Lower- and Middle-Income Countries. *Vaccines* 2022;10(2) doi: 10.3390/vaccines10020214
59. Alle YF, Oumer KE. Attitude and associated factors of COVID-19 vaccine acceptance among health professionals in Debre Tabor Comprehensive Specialized Hospital, North Central Ethiopia; 2021: cross-sectional study. *Virusdisease* 2021;32(2):272-78.
60. Wonodi C, Obi-Jeff C, Adewumi F, et al. Conspiracy theories and misinformation about COVID-19 in Nigeria: Implications for vaccine demand generation communications. *Vaccine* 2022 doi: 10.1016/j.vaccine.2022.02.005
61. MacDonald NE. Vaccine hesitancy: Definition, scope and determinants. *Vaccine* 2015;33(34):4161-64. doi: <https://doi.org/10.1016/j.vaccine.2015.04.036>
62. Shiferie F, Sada O, Fenta T, et al. Exploring reasons for COVID-19 vaccine hesitancy among healthcare providers in Ethiopia. *Pan Afr Med J* 2021;40:213. doi: 10.11604/pamj.2021.40.213.30699 [published Online First: 2022/02/10]
63. Anjorin AA, Odetokun IA, Abioye AI, et al. Will Africans take COVID-19 vaccination? *PLoS ONE* 2021;16(12):1-15. doi: 10.1371/journal.pone.0260575
64. Orangi S, Pinchoff J, Mwanga D, et al. Assessing the Level and Determinants of COVID-19 Vaccine Confidence in Kenya. *Vaccines* 2021;9(8) doi: 10.3390/vaccines9080936
65. Katoto PDMC, Parker S, Coulson N, et al. Predictors of COVID-19 Vaccine Hesitancy in South African Local Communities: The VaxScenes Study. *Vaccines* 2022;10(3):353.



- 1  
2  
3 66. Leach M, MacGregor H, Akello G, et al. Vaccine anxieties, vaccine preparedness:  
4 Perspectives from Africa in a Covid-19 era. *Social Science & Medicine* 2022;298:114826.  
5 doi: 10.1016/j.socscimed.2022.114826  
6  
7 67. WHO. Report of the SAGE Working Group on Vaccine Hesitancy, 2014.  
8  
9 68. Betsch C, Schmid P, Heinemeier D, et al. Beyond confidence: Development of a measure  
10 assessing the 5C psychological antecedents of vaccination. *PLOS ONE*  
11 2018;13(12):e0208601.  
12  
13 69. WHO, UNICEF. Data for action: achieving high uptake of COVID-19 vaccines: gathering and  
14 using data on the behavioural and social drivers of vaccination: a guidebook for  
15 immunization programmes and implementing partners: interim guidance, 3 February  
16 2021 2021 [Available from: <https://apps.who.int/iris/handle/10665/339452> accessed  
17 June 05, 2022].  
18  
19 70. Attwell K, Hannah A, Leask J. COVID-19: talk of 'vaccine hesitancy' lets governments off the  
20 hook. *Nature* 2022;602:574-77.  
21  
22  
23  
24  
25  
26  
27  
28  
29  
30  
31  
32  
33  
34  
35  
36  
37  
38  
39  
40  
41  
42  
43  
44  
45  
46  
47  
48  
49  
50  
51  
52  
53  
54  
55  
56  
57  
58  
59  
60

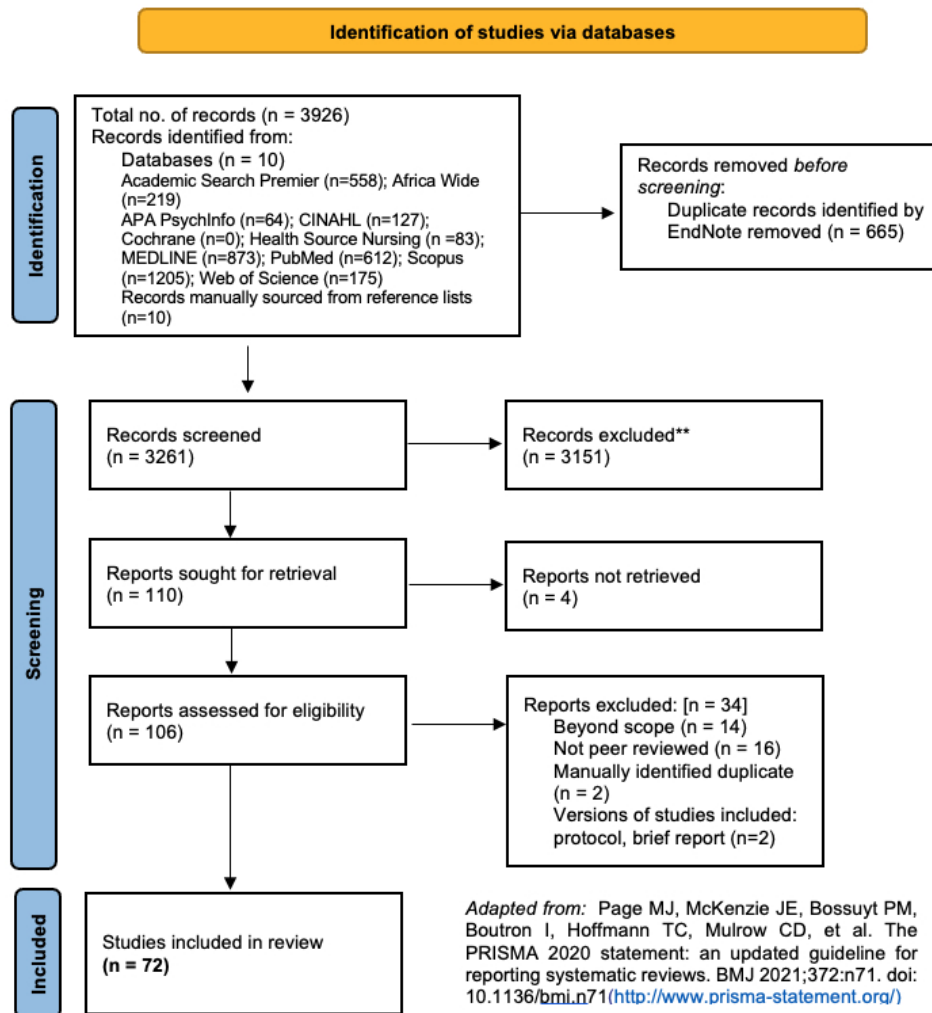

PRISMA Flow Diagram

260x273mm (72 x 72 DPI)



1  
2  
3  
4  
5  
6  
7  
8  
9  
10  
11  
12  
13  
14  
15  
16  
17  
18  
19  
20  
21  
22  
23  
24  
25  
26  
27  
28  
29  
30  
31  
32  
33  
34  
35  
36  
37  
38  
39  
40  
41  
42  
43  
44  
45  
46  
47  
48  
49  
50  
51  
52  
53  
54  
55  
56  
57  
58  
59  
60

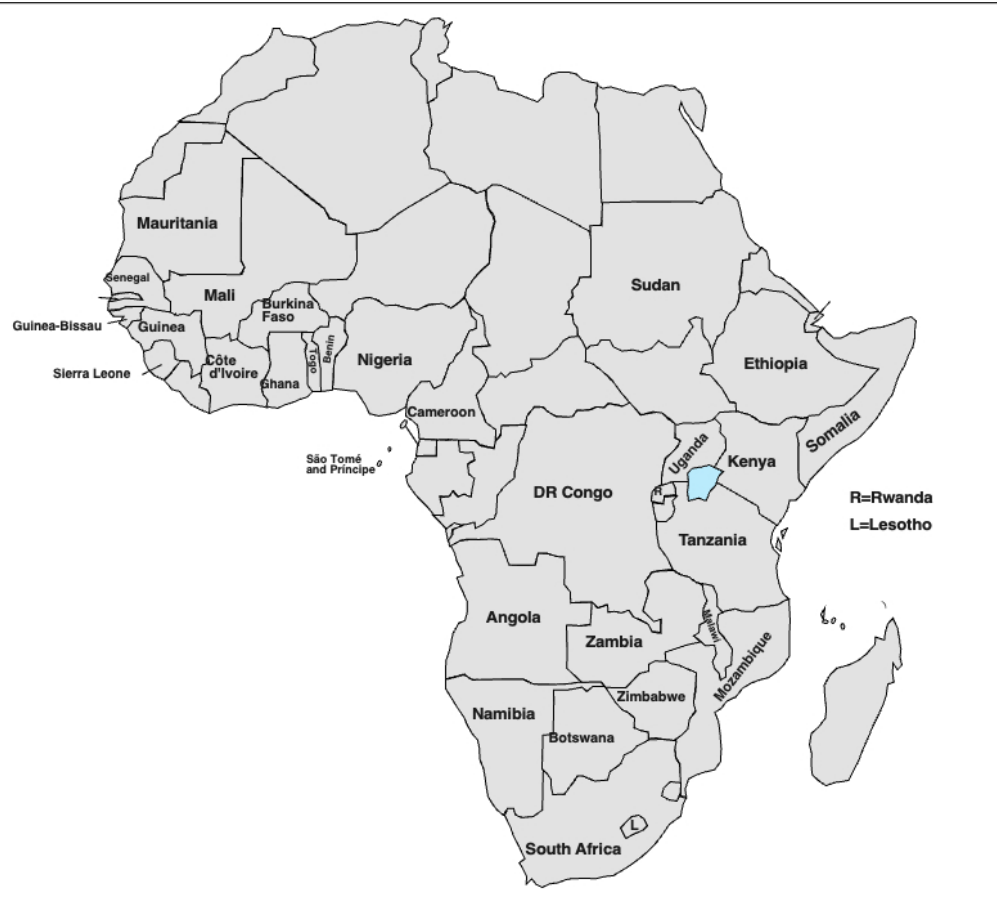

Countries Featured in Reviewed Studies  
274x245mm (72 x 72 DPI)

| Year | Author(s)                                                                                                                                                                                                                                                                                                                                                                           | Title                                                                                                                                                                        |
|------|-------------------------------------------------------------------------------------------------------------------------------------------------------------------------------------------------------------------------------------------------------------------------------------------------------------------------------------------------------------------------------------|------------------------------------------------------------------------------------------------------------------------------------------------------------------------------|
| 2021 | Á F. L. de Sousa, J. R. B. Teixeira, I. Lua, F. O. Souza, A. J. F. Ferreira, G. Schneider, H. E. F. de Carvalho, L. B. de Oliveira, S. V. M. A. Lima, A. R. de Sousa, T. M. E. de Araújo, E. L. S. Camargo, M. O. B. Oriá, I. Craveiro, T. M. de Araújo, I. A. C. Mendes, C. A. A. Ventura, I. Sousa, R. M. de Oliveira, M. Simão and I. Fronteira                                  | Determinants of COVID-19 vaccine hesitancy in portuguese-speaking countries: A structural equations modeling approach                                                        |
| 2021 | A. A. Shamshirsaz, K. Hessami, S. Morain, Y. Afshar, A. A. Nassr, S. E. Arian, N. M. Asl and K. Aagaard                                                                                                                                                                                                                                                                             | Intention to Receive COVID-19 Vaccine during Pregnancy: A Systematic Review and Meta-analysis                                                                                |
| 2021 | A. D. Wake                                                                                                                                                                                                                                                                                                                                                                          | The Acceptance Rate Toward COVID-19 Vaccine in Africa: A Systematic Review and Meta-analysis                                                                                 |
| 2022 | A. I. Al-Mustapha, M. I. Abubakar, M. Oyewo, R. E. Esighetti, O. A. Ogundijo, L. D. Bolanle, O. E. Fakayode, A. S. Olugbon, M. Oguntoye and N. Elelu                                                                                                                                                                                                                                | Socio-Demographic Characteristics of COVID-19 Vaccine Recipients in Kwara State, North Central Nigeria                                                                       |
| 2021 | A. Mose and A. Yeshaneh                                                                                                                                                                                                                                                                                                                                                             | COVID-19 vaccine acceptance and its associated factors among pregnant women attending antenatal care clinic in southwest ethiopia: Institutional-based cross-sectional study |
| 2021 | A. T. Chinawa, J. M. Chinawa, E. N. Ossai, N. Obinna, V. Onukwuli, A. E. Aronu and C. P. Manyike                                                                                                                                                                                                                                                                                    | Maternal level of awareness and predictors of willingness to vaccinate children against COVID 19; A multi-center study                                                       |
| 2021 | Abayomi Samuel Oyekale                                                                                                                                                                                                                                                                                                                                                              | Compliance Indicators of COVID-19 Prevention and Vaccines Hesitancy in Kenya: A Random-Effects Endogenous Probit Model                                                       |
| 2021 | AbdulAzeez A. Anjorin, Ismail A. Odetokun, Ajibola I. Abioye, Hager Elnadi, Mfon Valencia Umoren, Bamu F. Damaris, Joseph Eyedo, Haruna I. Umar, Jean B. Nyandwi, Mena M. Abdalla, Sadiq O. Tijani, Kwame S. Awiagah, Gbolahan A. Idowu, Sifeuh N. Achille Fabrice, Aala M. O. Maisara, Youssef Razouqi, Zuhail E. Mhgoob, Salim Parker, Osaretin E. Asowata and Ismail O. Adesanya | Will Africans take COVID-19 vaccination?                                                                                                                                     |
| 2021 | Abiy Tadesse Angelo, Daniel Shiferaw Alemayehu and Akililu Mamo Dachew                                                                                                                                                                                                                                                                                                              | Health care workers intention to accept COVID-19 vaccine and associated factors in southwestern Ethiopia, 2021                                                               |
| 2021 | Agazhe Aemro, Nakachew Sewnet Amare, Belayneh Shetie, Basazine Chekol and Mulugeta Wassie                                                                                                                                                                                                                                                                                           | Determinants of COVID-19 vaccine hesitancy among health care workers in Amhara region referral hospitals, Northwest Ethiopia: a cross-sectional study                        |
| 2021 | Andrea C Carcelen, Christine Prosperi, Simon Mutembo, Gershon Chongwe, Francis D Mwansa, Phillimon Ndubani, Edgar Simulundu, Innocent Chilumba, Gloria Musukwa and Phil Thuma                                                                                                                                                                                                       | COVID-19 vaccine hesitancy in Zambia: A glimpse at the possible challenges ahead for COVID-19 vaccination rollout in sub-Saharan Africa                                      |
| 2021 | Andrew Marvin Kanyike, Ronald Olum, Jonathan Kajjimu, Daniel Ojilong, Gabriel Madut Akech, Dianah Rhoda Nassozi, Drake Agira, Nicholas Kisaakye Wamala, Asaph Asiiimwe, Dissan Matovu, Ann Babra Nakimuli, Musilim Lyavala, Patricia Kulwenza, Joshua Kiwumulo and Felix Bongomin                                                                                                   | Acceptance of the coronavirus disease-2019 vaccine among medical students in Uganda                                                                                          |
| 2022 | Ayene Mose, Kassahun Haile and Abebe Timerga                                                                                                                                                                                                                                                                                                                                        | COVID-19 vaccine hesitancy among medical and health science students attending Wolkite University in Ethiopia                                                                |
| 2021 | B. O. Botwe, W. K. Antwi, J. A. Adusei, R. N. Mayeden, T. N. Akudjedu and S. D. Sule                                                                                                                                                                                                                                                                                                | COVID-19 vaccine hesitancy concerns: Findings from a Ghana clinical radiography workforce survey                                                                             |
| 2021 | B. T. Taye, F. K. Amogne, T. L. Demisse, M. S. Zerihun, T. M. Kitaw, A. E. Tiguh, M. S. Mihret and A. A. Kebede                                                                                                                                                                                                                                                                     | Coronavirus disease 2019 vaccine acceptance and perceived barriers among university students in northeast Ethiopia: A cross-sectional study                                  |
| 2021 | Bewunetu Zewude and Tewodros Habtegiorgis                                                                                                                                                                                                                                                                                                                                           | Willingness to Take COVID-19 Vaccine Among People Most at Risk of Exposure in Southern Ethiopia                                                                              |
| 2022 | C. Kassa Mekonnen, N. Gizaw Demissie, Z. Wako Beko, Y. Mulu Ferede and H. Kindie Abate                                                                                                                                                                                                                                                                                              | Intent to get vaccinated against COVID-19 pandemic and its associated factors among adults with a chronic medical condition                                                  |
| 2022 | C. S. Wiysonge, S. M. Alobwede, P. D. C. Katoto, E. B. Kidzeru, E. N. Lumngwena, S. Cooper, R. Goliath, A. Jackson and M. S. Shey                                                                                                                                                                                                                                                   | COVID-19 vaccine acceptance and hesitancy among healthcare workers in South Africa                                                                                           |

|    |      |                                                                                                                                                                                                                                  |                                                                                                                                                                      |
|----|------|----------------------------------------------------------------------------------------------------------------------------------------------------------------------------------------------------------------------------------|----------------------------------------------------------------------------------------------------------------------------------------------------------------------|
| 1  |      |                                                                                                                                                                                                                                  |                                                                                                                                                                      |
| 2  | 2022 | Chizoba Wonodi, Chisom Obi-Jeff, Funmilayo Adewumi, Somto Chloe Keluo-Udeke, Rachel Gur-Arie, Carleigh Krubiner, Elana Felice Jaffe, Tobi Bamiduro, Ruth Karron and Ruth Faden                                                   | Conspiracy theories and misinformation about COVID-19 in Nigeria: Implications for vaccine demand generation communications                                          |
| 3  |      |                                                                                                                                                                                                                                  |                                                                                                                                                                      |
| 4  | 2022 | Christoph Strupat, Zemzem Shigute, Arjun S. Bedi and Matthias Rieger                                                                                                                                                             | Willingness to take COVID-19 vaccination in low-income countries: Evidence from Ethiopia                                                                             |
| 5  | 2021 | D. R. Terefa, A. T. Shama, B. R. Feyisa, A. E. Desisa, E. T. Geta, M. C. Cheme and A. T. Edosa                                                                                                                                   | COVID-19 Vaccine Uptake and Associated Factors Among Health Professionals in Ethiopia                                                                                |
| 6  |      |                                                                                                                                                                                                                                  |                                                                                                                                                                      |
| 7  | 2022 | D. Yilma, R. Mohammed, S. Getahun Abdela, W. Enbiale, F. Seifu, M. Pareyn, L. Liesenborghs, J. van Griensven and S. van Henten                                                                                                   | COVID-19 vaccine acceptability among health care workers in Ethiopia: Do we practice what we preach?                                                                 |
| 8  |      |                                                                                                                                                                                                                                  |                                                                                                                                                                      |
| 9  | 2021 | Ekaete Alice Tobin, Martha Okonofua, Azuka Adeke and Andrew Obi                                                                                                                                                                  | Willingness to accept a COVID-19 vaccine in Nigeria: a population-based cross-sectional study                                                                        |
| 10 | 2021 | Elizabeth O. Oduwole, Tonya M. Esterhuizen, Hassan Mahomed and Charles S. Wiysonge                                                                                                                                               | Estimating Vaccine Confidence Levels among Healthcare Staff and Students of a Tertiary Institution in South Africa                                                   |
| 11 |      |                                                                                                                                                                                                                                  |                                                                                                                                                                      |
| 12 | 2021 | F. A. Gbeasor-Komlanvi, K. A. Afanvi, Y. R. Konu, Y. Agbobli, A. J. Sadio, M. K. Tchankoni, W. I. C. Zida-Compaore, J. Nayo-Apetsanyi, S. Agoro, A. Lambokale, D. Nyametso, T. N'Tapi, K. Aflagah, M. Mijiyawa and D. K. Ekouevi | Prevalence and factors associated with COVID-19 vaccine hesitancy in health professionals in Togo, 2021                                                              |
| 13 |      |                                                                                                                                                                                                                                  |                                                                                                                                                                      |
| 14 | 2021 | F. Shiferie, O. Sada, T. Fenta, M. Kaba and A. M. Fentie                                                                                                                                                                         | Exploring reasons for COVID-19 vaccine hesitancy among healthcare providers in Ethiopia                                                                              |
| 15 | 2021 | Felix Bongomin, Ronald Olum, Irene Andia-Biraro, Frederick Nelson Nakwagala, Khalid Hudow Hassan, Dianah Rhoda Nassozi, Mark Kaddumukasa, Pauline Byakika-Kibwika, Sarah Kiguli and Bruce J. Kirenga                             | COVID-19 vaccine acceptance among high-risk populations in Uganda                                                                                                    |
| 16 |      |                                                                                                                                                                                                                                  |                                                                                                                                                                      |
| 17 |      |                                                                                                                                                                                                                                  |                                                                                                                                                                      |
| 18 | 2021 | G. Asmare, K. Abebe, N. Atnafu, G. Asnake, A. Yeshambel, E. Alem, E. Chekol and T. Asmamaw                                                                                                                                       | Behavioral intention and its predictors toward COVID-19 vaccination among people most at risk of exposure in Ethiopia: applying the theory of planned behavior model |
| 19 |      |                                                                                                                                                                                                                                  |                                                                                                                                                                      |
| 20 | 2021 | G. Murewanhema, T. V. Burukai, B. Chireka and E. Kunonga                                                                                                                                                                         | Implementing national COVID-19 vaccination programmes in sub-Saharan Africa- early lessons from Zimbabwe: a descriptive cross-sectional study                        |
| 21 |      |                                                                                                                                                                                                                                  |                                                                                                                                                                      |
| 22 | 2022 | H. Adedeji-Adenola, O. A. Olugbake and S. A. Adeosun                                                                                                                                                                             | Factors influencing COVID-19 vaccine uptake among adults in Nigeria                                                                                                  |
| 23 | 2021 | Haimanot Abebe, Solomon Shitu and Ayenew Mose                                                                                                                                                                                    | Understanding of COVID-19 vaccine knowledge, attitude, acceptance, and determinates of COVID-19 vaccine acceptance among adult population in Ethiopia                |
| 24 |      |                                                                                                                                                                                                                                  |                                                                                                                                                                      |
| 25 | 2021 | J. D. Ditekemena, D. M. Nkamba, A. Mutwadi, H. M. Mavoko, J. N. Siewe Fodjo, C. Luhata, M. Obimpeh, S. Van Hees, J. B. Nachege and R. Colebunders                                                                                | COVID-19 Vaccine Acceptance in the Democratic Republic of Congo: A Cross-Sectional Survey                                                                            |
| 26 |      |                                                                                                                                                                                                                                  |                                                                                                                                                                      |
| 27 | 2021 | J. Dula, A. Mulhanga, A. Nhanombe, L. Cumbi, A. Júnior, J. Gwatsvaira, J. N. Siewe Fodjo, E. F. De Moura Villela, S. Chicumbe and R. Colebunders                                                                                 | Covid-19 vaccine acceptability and its determinants in mozambique: An online survey                                                                                  |
| 28 |      |                                                                                                                                                                                                                                  |                                                                                                                                                                      |
| 29 | 2020 | Jeffrey V. Lazarus, Katarzyna Wyka, Lauren Rauh, Kenneth Rabin, Scott Ratzan, Lawrence O. Gostin, Heidi J. Larson and Ayman El-Mohandes                                                                                          | Hesitant or not? The association of age, gender, and education with potential acceptance of a COVID-19 vaccine: A country-level analysis                             |
| 30 | 2021 | Jerome Nyhalah Dinga, Leontine Kouemou Sinda and Vincent P. K. Titanji                                                                                                                                                           | Assessment of Vaccine Hesitancy to a COVID-19 Vaccine in Cameroonian Adults and Its Global Implication                                                               |
| 31 | 2021 | Julio S Solís Arce, Shana S Warren, Niccolò F Meriggi, Alexandra Scacco, Nina McMurry, Maarten Voors, Georgiy Syunyaev, Aryn Abdul Malik, Samya Aboutajdine and Opeyemi Adejo                                                    | COVID-19 vaccine acceptance and hesitancy in low-and middle-income countries                                                                                         |
| 32 |      |                                                                                                                                                                                                                                  |                                                                                                                                                                      |
| 33 |      |                                                                                                                                                                                                                                  |                                                                                                                                                                      |
| 34 | 2021 | Kegniet Shitu, Maereg Wolde, Simegnaw Handebo and Ayenew Kassie                                                                                                                                                                  | Acceptance and willingness to pay for COVID-19 vaccine among school teachers in Gondar City, Northwest Ethiopia                                                      |
| 35 |      |                                                                                                                                                                                                                                  |                                                                                                                                                                      |
| 36 | 2021 | Lauren McAbee, Oscar Tapera and Mufaro Kanyangarara                                                                                                                                                                              | Factors Associated with COVID-19 Vaccine Intentions in Eastern Zimbabwe: A Cross-Sectional Study                                                                     |
| 37 | 2022 | Lulin Zhou, Sabina Ampon-Wireko, Xinglong Xu, Prince Edwudzie Quansah and Ebenezer Laryo                                                                                                                                         | Media attention and Vaccine Hesitancy: Examining the mediating effects of Fear of COVID-19 and the moderating role of Trust in leadership                            |
| 38 |      |                                                                                                                                                                                                                                  |                                                                                                                                                                      |
| 39 | 2021 | M. A. M. Ahmed, R. Colebunders, A. A. Gele, A. A. Farah, S. Osman, I. A. Guled, A. A. M. Abdullahi, A. M. Hussein, A. M. Ali and J. N. S. Fodjo                                                                                  | COVID-19 Vaccine Acceptability and Adherence to Preventive Measures in Somalia: Results of an Online Survey                                                          |
| 40 | 2021 | M. G. Salomoni, Z. Di Valerio, E. Gabrielli, M. Montalti, D. Tedesco, F. Guaraldi and D. Gori                                                                                                                                    | Hesitant or not hesitant? A systematic review on global covid-19 vaccine acceptance in different populations                                                         |
| 41 |      |                                                                                                                                                                                                                                  |                                                                                                                                                                      |
| 42 |      |                                                                                                                                                                                                                                  |                                                                                                                                                                      |
| 43 |      |                                                                                                                                                                                                                                  |                                                                                                                                                                      |
| 44 |      |                                                                                                                                                                                                                                  |                                                                                                                                                                      |
| 45 |      |                                                                                                                                                                                                                                  |                                                                                                                                                                      |
| 46 |      |                                                                                                                                                                                                                                  |                                                                                                                                                                      |

|    |      |                                                                                                                                                                                                                                                                                                                                                                                                   |                                                                                                                                                     |
|----|------|---------------------------------------------------------------------------------------------------------------------------------------------------------------------------------------------------------------------------------------------------------------------------------------------------------------------------------------------------------------------------------------------------|-----------------------------------------------------------------------------------------------------------------------------------------------------|
| 1  |      |                                                                                                                                                                                                                                                                                                                                                                                                   |                                                                                                                                                     |
| 2  | 2020 | M. Kabamba Nzaji, L. Kabamba Ngombe, G. Ngoie Mwamba, D. B. Banza Ndala, J. Mbidi Miema, C. Luhata Lungoyo, B. Lora Mwimba, A. Cikomola Mwana Bene and E. Mukamba Musenga                                                                                                                                                                                                                         | Acceptability of Vaccination Against COVID-19 Among Healthcare Workers in the Democratic Republic of the Congo                                      |
| 3  |      |                                                                                                                                                                                                                                                                                                                                                                                                   |                                                                                                                                                     |
| 4  | 2021 | M. Mesesle                                                                                                                                                                                                                                                                                                                                                                                        | Awareness and attitude towards covid-19 vaccination and associated factors in ethiopia: Cross-sectional study                                       |
| 5  |      |                                                                                                                                                                                                                                                                                                                                                                                                   |                                                                                                                                                     |
| 6  | 2021 | M. T. J. Ansari and N. A. Khan                                                                                                                                                                                                                                                                                                                                                                    | Worldwide COVID-19 vaccines sentiment analysis through twitter content                                                                              |
| 7  | 2021 | Malik Sallam                                                                                                                                                                                                                                                                                                                                                                                      | COVID-19 Vaccine Hesitancy Worldwide: A Concise Systematic Review of Vaccine Acceptance Rates                                                       |
| 8  | 2021 | Martin Wiredu Agyekum, Grace Frempong Afrifa-Anane, Frank Kyei-Arthur and Bright Addo                                                                                                                                                                                                                                                                                                             | Acceptability of COVID-19 vaccination among health care workers in Ghana                                                                            |
| 9  |      |                                                                                                                                                                                                                                                                                                                                                                                                   |                                                                                                                                                     |
| 10 | 2022 | Melissa Leach, Hayley MacGregor, Grace Akello, Lawrence Babawo, Moses Baluku, Alice Desclaux, Catherine Grant, Foday Kamara, Marion Nyakoi, Melissa Parker, Paul Richards, Esther Mokuwa, Bob Okello, Kelley Sams and Khoudia Sow                                                                                                                                                                 | Vaccine anxieties, vaccine preparedness: Perspectives from Africa in a Covid-19 era                                                                 |
| 11 |      |                                                                                                                                                                                                                                                                                                                                                                                                   |                                                                                                                                                     |
| 12 | 2022 | Metadel Adane, Ayechev Ademas and Helmut Kloos                                                                                                                                                                                                                                                                                                                                                    | Knowledge, attitudes, and perceptions of COVID-19 vaccine and refusal to receive COVID-19 vaccine among healthcare workers in northeastern Ethiopia |
| 13 |      |                                                                                                                                                                                                                                                                                                                                                                                                   |                                                                                                                                                     |
| 14 | 2021 | Mohammed A. M. Ahmed, Robert Colebunders, Abdi A. Gele, Abdiqani A. Farah, Shariff Osman, Ibraahim Abdullahi Guled, Aweis Ahmed Moalim Abdullahi, Ahmed Mohamud Hussein, Abdiaziz Mohamed Ali and Joseph Nelson Siewe Fodjo                                                                                                                                                                       | COVID-19 Vaccine Acceptability and Adherence to Preventive Measures in Somalia: Results of an Online Survey                                         |
| 15 |      |                                                                                                                                                                                                                                                                                                                                                                                                   |                                                                                                                                                     |
| 16 | 2021 | Nasim Asadi Faezi, Pourya Gholizadeh, Moussa Sanogo, Amadou Oumarou, Maad Nasser Mohamed, Yacouba Cissoko, Mamadou Saliou Sow, Bakary Sayon Keita, Youssouf A. G. Mohamed Baye, Pasquale Pagliano, Patassi Akouda, Sid'Ahmed Soufiane, Akory Ag Iknane, Mamadou Oury Safiatou Diallo, Zakaria Gansane, Barkat Ali Khan, Şükran Köse, Hamid Allahverdipour, Khudaverdi Ganvarov and Mariam Soumaré | Peoples' attitude toward COVID-19 vaccine, acceptance, and social trust among African and Middle East countries                                     |
| 17 |      |                                                                                                                                                                                                                                                                                                                                                                                                   |                                                                                                                                                     |
| 18 | 2021 | O. V. Adeniyi, D. Stead, M. Singata-Madliki, J. Batting, M. Wright, E. Jelliman, S. Abrahams and A. Parrish                                                                                                                                                                                                                                                                                       | Acceptance of covid-19 vaccine among the healthcare workers in the eastern cape, south africa: A cross sectional study                              |
| 19 |      |                                                                                                                                                                                                                                                                                                                                                                                                   |                                                                                                                                                     |
| 20 | 2021 | Obi Peter Adigwe                                                                                                                                                                                                                                                                                                                                                                                  | COVID-19 vaccine hesitancy and willingness to pay: Emergent factors from a cross-sectional study in Nigeria                                         |
| 21 |      |                                                                                                                                                                                                                                                                                                                                                                                                   |                                                                                                                                                     |
| 22 | 2021 | P. C. Addo, N. B. Kulbo, K. A. Sagoe, A. A. Ohemeng and E. Amuzu                                                                                                                                                                                                                                                                                                                                  | Guarding against COVID-19 vaccine hesitancy in Ghana: analytic view of personal health engagement and vaccine related attitude                      |
| 23 |      |                                                                                                                                                                                                                                                                                                                                                                                                   |                                                                                                                                                     |
| 24 | 2022 | Patrick D. M. C. Katoto, Saahier Parker, Nancy Coulson, Nirvana Pillay, Sara Cooper, Anelisa Jaca, Edison Mavundza, Gregory Houston, Candice Groenewald, Zaynab Essack, Jane Simmonds, Londiwe Deborah Shandu, Marilyn Couch, Nonkululeko Khuzwayo, Nobukhosi Ncube, Phelele Bhengu, Heidi van Rooyen and Charles Shey Wiysonge                                                                   | Predictors of COVID-19 Vaccine Hesitancy in South African Local Communities: The VaxScenes Study                                                    |
| 25 |      |                                                                                                                                                                                                                                                                                                                                                                                                   |                                                                                                                                                     |
| 26 | 2021 | Rihanna Mohammed, Teklehaimanot Mezgebe Nguse, Bruck Messele Habte, Atalay Mulu Fentie and Gebremedhin Beedemariam Gebretekle                                                                                                                                                                                                                                                                     | COVID-19 vaccine hesitancy among Ethiopian healthcare workers                                                                                       |
| 27 |      |                                                                                                                                                                                                                                                                                                                                                                                                   |                                                                                                                                                     |
| 28 | 2021 | Robert Kaba Alhassan, Matilda Aberese-Ako, Phidelia Theresa Doegah, Mustapha Immurana, Maxwel Ayindenaba Dalaba, Alfred Kwesi Manyeh, Desmond Klu, Evelyn Acquah, Evelyn Korkor Ansa and Margaret Gyapong                                                                                                                                                                                         | COVID-19 vaccine hesitancy among the adult population in Ghana: evidence from a pre-vaccination rollout survey                                      |
| 29 |      |                                                                                                                                                                                                                                                                                                                                                                                                   |                                                                                                                                                     |
| 30 | 2022 | Ronelle Burger, Timothy Köhler, Aleksandra M. Golos, Alison M. Buttenheim, René English, Michele Tameris and Brendan Maughan-Brown                                                                                                                                                                                                                                                                | Longitudinal changes in COVID-19 vaccination intent among South African adults: evidence from the NIDS-CRAM panel survey, February to May 2021      |
| 31 |      |                                                                                                                                                                                                                                                                                                                                                                                                   |                                                                                                                                                     |
| 32 | 2021 | S. A. Bono, E. Faria de Moura Villela, C. S. Siau, W. S. Chen, S. Pengpid, M. T. Hasan, P. Sessou, J. D. Ditekemena, B. O. Amodan, M. C. Hosseinipour, H. Dolo, J. N. Siewe Fodjo, W. Y. Low and R. Colebunders                                                                                                                                                                                   | Factors Affecting COVID-19 Vaccine Acceptance: An International Survey among Low- and Middle-Income Countries                                       |
| 33 |      |                                                                                                                                                                                                                                                                                                                                                                                                   |                                                                                                                                                     |
| 34 |      |                                                                                                                                                                                                                                                                                                                                                                                                   |                                                                                                                                                     |
| 35 |      |                                                                                                                                                                                                                                                                                                                                                                                                   |                                                                                                                                                     |
| 36 |      |                                                                                                                                                                                                                                                                                                                                                                                                   |                                                                                                                                                     |
| 37 |      |                                                                                                                                                                                                                                                                                                                                                                                                   |                                                                                                                                                     |
| 38 |      |                                                                                                                                                                                                                                                                                                                                                                                                   |                                                                                                                                                     |
| 39 |      |                                                                                                                                                                                                                                                                                                                                                                                                   |                                                                                                                                                     |
| 40 |      |                                                                                                                                                                                                                                                                                                                                                                                                   |                                                                                                                                                     |
| 41 |      |                                                                                                                                                                                                                                                                                                                                                                                                   |                                                                                                                                                     |
| 42 |      |                                                                                                                                                                                                                                                                                                                                                                                                   |                                                                                                                                                     |
| 43 |      |                                                                                                                                                                                                                                                                                                                                                                                                   |                                                                                                                                                     |
| 44 |      |                                                                                                                                                                                                                                                                                                                                                                                                   |                                                                                                                                                     |
| 45 |      |                                                                                                                                                                                                                                                                                                                                                                                                   |                                                                                                                                                     |
| 46 |      |                                                                                                                                                                                                                                                                                                                                                                                                   |                                                                                                                                                     |

|    |      |                                                                                                                                                                                             |                                                                                                                                                                                                  |
|----|------|---------------------------------------------------------------------------------------------------------------------------------------------------------------------------------------------|--------------------------------------------------------------------------------------------------------------------------------------------------------------------------------------------------|
| 1  |      |                                                                                                                                                                                             |                                                                                                                                                                                                  |
| 2  | 2021 | S. Handebo, M. Wolde, K. Shitu and A. Kassie                                                                                                                                                | Determinant of intention to receive COVID-19 vaccine among school teachers in Gondar City, Northwest Ethiopia                                                                                    |
| 3  |      |                                                                                                                                                                                             |                                                                                                                                                                                                  |
| 4  | 2021 | Shelton Kanyanda, Yannick Markhof, Philip Wollburg and Alberto Zezza                                                                                                                        | Acceptance of COVID-19 vaccines in sub-Saharan Africa: evidence from six national phone surveys                                                                                                  |
| 5  | 2021 | Sohail Agha, Adaobi Chine, Mathias Lalika, Samikshya Pandey, Aparna Seth, Alison Wiyeh, Alyssa Seng, Nandan Rao and Akhtar Badshah                                                          | Drivers of COVID-19 Vaccine Uptake amongst Healthcare Workers (HCWs) in Nigeria                                                                                                                  |
| 6  | 2021 | Stacey Orangi, Jessie Pinchoff, Daniel Mwanga, Timothy Abuya, Mainga Hamaluba, George Warimwe, Karen Austrian and Edwine Barasa                                                             | Assessing the Level and Determinants of COVID-19 Vaccine Confidence in Kenya                                                                                                                     |
| 7  |      |                                                                                                                                                                                             |                                                                                                                                                                                                  |
| 8  | 2022 | T. P. Davis, Jr., A. K. Yimam, M. A. Kalam, A. D. Tolossa, R. Kanwagi, S. Bauler, L. Kulathungam and H. Larson                                                                              | Behavioural Determinants of COVID-19-Vaccine Acceptance in Rural Areas of Six Lower- and Middle-Income Countries                                                                                 |
| 9  |      |                                                                                                                                                                                             |                                                                                                                                                                                                  |
| 10 | 2021 | Theophilus Acheampong, Eli A. Akorsikumah, John Osae-Kwapong, Musah Khalid, Alfred Appiah and John H. Amuasi                                                                                | Examining Vaccine Hesitancy in Sub-Saharan Africa: A Survey of the Knowledge and Attitudes among Adults to Receive COVID-19 Vaccines in Ghana                                                    |
| 11 |      |                                                                                                                                                                                             |                                                                                                                                                                                                  |
| 12 | 2021 | U. G. Okafor, A. Isah, J. C. Onuh, C. B. Mgbemena and C. M. Ubaka                                                                                                                           | Community acceptance and willingness to pay for hypothetical COVID-19 vaccines in a developing country: a web-based nationwide study in Nigeria                                                  |
| 13 |      |                                                                                                                                                                                             |                                                                                                                                                                                                  |
| 14 | 2021 | Ugochukwu A. Eze, Kingsley I. Ndoh, Babalola A. Ibisola, Chinemerem D. Onwuliri, Adenekan Osiyemi, Nnamdi Ude, Amalachukwu A. Chime, Eric O. Ogbor, Adegboyega O. Alao and Ashiru Abdullahi | Determinants for Acceptance of COVID-19 Vaccine in Nigeria                                                                                                                                       |
| 15 |      |                                                                                                                                                                                             |                                                                                                                                                                                                  |
| 16 | 2021 | Umakrishnan Kollamparambil, Adeola Oyenubi and Chijioko Nwosu                                                                                                                               | COVID19 vaccine intentions in South Africa: health communication strategy to address vaccine hesitancy                                                                                           |
| 17 | 2021 | Yewlsey Fentie Alle and Keder Essa Oumer                                                                                                                                                    | Attitude and associated factors of COVID-19 vaccine acceptance among health professionals in Debre Tabor Comprehensive Specialized Hospital, North Central Ethiopia; 2021: cross-sectional study |
| 18 |      |                                                                                                                                                                                             |                                                                                                                                                                                                  |
| 19 | 2021 | Yitayeh Belsti, Yibeltal Yismaw Gela, Yonas Akalu, Baye Dagnew, Mihret Getnet, Mohammed Abdu Seid, Mengistie Diress, Yigizie Yeshaw and Sofonias Addis Fekadu                               | Willingness of Ethiopian population to receive COVID-19 vaccine                                                                                                                                  |
| 20 |      |                                                                                                                                                                                             |                                                                                                                                                                                                  |
| 21 | 2021 | Yusuff Adebayo Adebisi, Aishat Jumoke Alaran, Obasanjo Afolabi Bolarinwa, Wuraola Akande Sholabi and Don Eliseo Lucero-Prisno Iii                                                           | When it is available, will we take it? Social media users' perception of hypothetical COVID-19 vaccine in Nigeria                                                                                |
| 22 |      |                                                                                                                                                                                             |                                                                                                                                                                                                  |
| 23 | 2021 | Z. Iliyasu, A. A. Umar, H. M. Abdullahi, A. A. Kwaku, T. G. Amole, F. I. Tsigah-Ahmed, R. M. Garba, H. M. Salihu and M. H. Aliyu                                                            | They have produced a vaccine, but we doubt if COVID-19 exists: correlates of COVID-19 vaccine acceptability among adults in Kano, Nigeria                                                        |
| 24 |      |                                                                                                                                                                                             |                                                                                                                                                                                                  |
| 25 | 2021 | Zubairu Iliyasu, Muhammad R. Garba, Auwalu U. Gajida, Taiwo G. Amole, Amina A. Umar, Hadiza M. Abdullahi, Aminatu A. Kwaku, Hamisu M. Salihu and Muktar H. Aliyu                            | 'Why Should I Take the COVID-19 Vaccine after Recovering from the Disease?' A Mixed-methods Study of Correlates of COVID-19 Vaccine Acceptability among Health Workers in Northern Nigeria       |
| 26 |      |                                                                                                                                                                                             |                                                                                                                                                                                                  |
| 27 |      |                                                                                                                                                                                             |                                                                                                                                                                                                  |
| 28 |      |                                                                                                                                                                                             |                                                                                                                                                                                                  |
| 29 |      |                                                                                                                                                                                             |                                                                                                                                                                                                  |
| 30 |      |                                                                                                                                                                                             |                                                                                                                                                                                                  |
| 31 |      |                                                                                                                                                                                             |                                                                                                                                                                                                  |
| 32 |      |                                                                                                                                                                                             |                                                                                                                                                                                                  |
| 33 |      |                                                                                                                                                                                             |                                                                                                                                                                                                  |
| 34 |      |                                                                                                                                                                                             |                                                                                                                                                                                                  |
| 35 |      |                                                                                                                                                                                             |                                                                                                                                                                                                  |
| 36 |      |                                                                                                                                                                                             |                                                                                                                                                                                                  |
| 37 |      |                                                                                                                                                                                             |                                                                                                                                                                                                  |
| 38 |      |                                                                                                                                                                                             |                                                                                                                                                                                                  |
| 39 |      |                                                                                                                                                                                             |                                                                                                                                                                                                  |
| 40 |      |                                                                                                                                                                                             |                                                                                                                                                                                                  |
| 41 |      |                                                                                                                                                                                             |                                                                                                                                                                                                  |
| 42 |      |                                                                                                                                                                                             |                                                                                                                                                                                                  |
| 43 |      |                                                                                                                                                                                             |                                                                                                                                                                                                  |
| 44 |      |                                                                                                                                                                                             |                                                                                                                                                                                                  |
| 45 |      |                                                                                                                                                                                             |                                                                                                                                                                                                  |
| 46 |      |                                                                                                                                                                                             |                                                                                                                                                                                                  |

# BMJ Open

## Determinants of COVID-19 vaccine hesitancy and uptake in sub-Saharan Africa: A scoping review

|                                 |                                                                                                                                                                                                                                                                                                                                                                                                                    |
|---------------------------------|--------------------------------------------------------------------------------------------------------------------------------------------------------------------------------------------------------------------------------------------------------------------------------------------------------------------------------------------------------------------------------------------------------------------|
| Journal:                        | <i>BMJ Open</i>                                                                                                                                                                                                                                                                                                                                                                                                    |
| Manuscript ID                   | bmjopen-2022-066615.R1                                                                                                                                                                                                                                                                                                                                                                                             |
| Article Type:                   | Original research                                                                                                                                                                                                                                                                                                                                                                                                  |
| Date Submitted by the Author:   | 24-Aug-2022                                                                                                                                                                                                                                                                                                                                                                                                        |
| Complete List of Authors:       | Deml, Michael; University of Geneva, Institute of Sociological Research, Department of Sociology; University of Cape Town Faculty of Health Sciences, School of Public Health and Family Medicine, Division of Social and Behavioural Sciences<br>Githaiga, Jennifer; University of Cape Town Faculty of Health Sciences, School of Public Health and Family Medicine, Division of Social and Behavioural Sciences |
| <b>Primary Subject Heading</b>: | Public health                                                                                                                                                                                                                                                                                                                                                                                                      |
| Secondary Subject Heading:      | Public health, Infectious diseases, Immunology (including allergy), Health services research, Global health                                                                                                                                                                                                                                                                                                        |
| Keywords:                       | COVID-19, PUBLIC HEALTH, EPIDEMIOLOGY, Infection control < INFECTIOUS DISEASES, Public health < INFECTIOUS DISEASES                                                                                                                                                                                                                                                                                                |
|                                 |                                                                                                                                                                                                                                                                                                                                                                                                                    |

SCHOLARONE™  
Manuscripts

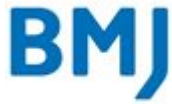

I, the Submitting Author has the right to grant and does grant on behalf of all authors of the Work (as defined in the below author licence), an exclusive licence and/or a non-exclusive licence for contributions from authors who are: i) UK Crown employees; ii) where BMJ has agreed a CC-BY licence shall apply, and/or iii) in accordance with the terms applicable for US Federal Government officers or employees acting as part of their official duties; on a worldwide, perpetual, irrevocable, royalty-free basis to BMJ Publishing Group Ltd ("BMJ") its licensees and where the relevant Journal is co-owned by BMJ to the co-owners of the Journal, to publish the Work in this journal and any other BMJ products and to exploit all rights, as set out in our [licence](#).

The Submitting Author accepts and understands that any supply made under these terms is made by BMJ to the Submitting Author unless you are acting as an employee on behalf of your employer or a postgraduate student of an affiliated institution which is paying any applicable article publishing charge ("APC") for Open Access articles. Where the Submitting Author wishes to make the Work available on an Open Access basis (and intends to pay the relevant APC), the terms of reuse of such Open Access shall be governed by a Creative Commons licence – details of these licences and which [Creative Commons](#) licence will apply to this Work are set out in our licence referred to above.

Other than as permitted in any relevant BMJ Author's Self Archiving Policies, I confirm this Work has not been accepted for publication elsewhere, is not being considered for publication elsewhere and does not duplicate material already published. I confirm all authors consent to publication of this Work and authorise the granting of this licence.

1  
2  
3 **Determinants of COVID-19 vaccine hesitancy and uptake in sub-Saharan Africa: A**  
4 **scoping review**  
5

6 **Authors and Co-authors:**  
7

8 **Michael J. Deml\* <sup>1,2</sup> (corresponding author)**  
9

10 Postal address:

11 School of Public Health & Family Medicine  
12 Faculty of Health Sciences, University of Cape Town  
13 Falmouth Building, Anzio Road, Observatory, 7925

14 Email: [michaeljdeml@gmail.com](mailto:michaeljdeml@gmail.com)

15 Telephone: +27 21 406 6300

16 Fax: +27 21 406 6459  
17  
18

19 **Jennifer Nyawira Githaiga\* <sup>2</sup>**  
20

21 Postal address:

22 Division of Social and Behavioural Sciences  
23 School of Public Health & Family Medicine  
24 Faculty of Health Sciences, University of Cape Town  
25 Falmouth Building, Anzio Road, Observatory, 7925

26 Email: [Jennifer.githaiga@uct.ac.za](mailto:Jennifer.githaiga@uct.ac.za)

27 Telephone: +27 21 406 6300

28 Fax: +27 21 406 6459  
29  
30  
31

32 \*equal contribution

33 <sup>1</sup> University of Geneva, Institute of Sociological Research, Department of Sociology,  
34 Geneva, Switzerland

35 <sup>2</sup> University of Cape Town, Faculty of Health Sciences, School of Public Health and  
36 Family Medicine, Division of Social and Behavioural Sciences, Cape Town, South Africa  
37  
38

39 **Keywords:** COVID-19, vaccine hesitancy, scoping review, access, sub-Saharan Africa  
40

41 **Word count: 5538**  
42  
43  
44  
45  
46  
47  
48  
49  
50  
51  
52  
53  
54  
55  
56  
57  
58  
59  
60



1  
2  
3 **Determinants of COVID-19 vaccine hesitancy and uptake in sub-Saharan Africa: A**  
4 **scoping review**  
5

6  
7 **ABSTRACT**  
8

9  
10 **Objective** To identify, describe and map the research tools used to measure COVID-19  
11 vaccine hesitancy, refusal, acceptance and access in sub-Saharan Africa.  
12  
13

14 **Design** Scoping review  
15

16  
17 **Methods** In March 2022, we searched PubMed, Scopus, Web of Science, Cochrane,  
18 Academic Search Premier, MEDLINE, CINAHL, Health Source Nursing, Africa Wide and  
19 APA PsychInfo for peer-reviewed literature in English related to COVID-19 vaccine  
20 hesitancy, refusal, acceptance, and access in SSA. We used the Preferred Reporting  
21 Items for Systematic Reviews and Meta-Analyses extension for Scoping Reviews  
22 (PRISMA-ScR) to guide evidence gathering and as a template to present the evidence  
23 retrieval process.  
24  
25

26  
27 **Results** In the studies selected for review (n=72) several measurement tools were  
28 utilised to measure COVID-19 vaccine hesitancy, acceptance, and refusal. These  
29 measurements were *willingness* and *intent* to vaccinate from the perspectives of the  
30 general population, special population groups such as mothers, students and staff in  
31 academic institutions and healthcare workers, and *uptake* as a proxy for measuring  
32 assumed COVID-19 vaccine acceptance. Measurements of access to COVID-19  
33 vaccination were cost and affordability, convenience, distance, and time to travel or time  
34 waiting for a vaccine, and (dis)comfort. Although all studies measured COVID-19  
35 vaccine hesitancy, acceptance, and refusal, relatively few studies (n=16, 22.2%)  
36 included explicit measurements of access to COVID-19 vaccination.  
37  
38  
39  
40  
41  
42  
43  
44  
45  
46  
47  
48  
49  
50  
51  
52  
53  
54  
55  
56  
57  
58  
59  
60

1  
2  
3 **Conclusions** Based upon the gaps identified in the scoping review, we propose that  
4  
5 future research on determinants of COVID-19 vaccination in sub-Saharan Africa should  
6  
7 further prioritize the inclusion of access-related variables. We recommend the  
8  
9 development and use of standardized research tools that can operationalize, measure,  
10  
11 and disentangle the complex determinants of vaccine uptake in future studies  
12  
13  
14 throughout sub-Saharan Africa and other LMIC settings.  
15  
16  
17  
18

### 19 **STRENGTHS AND LIMITATIONS OF THIS STUDY**

- 21 • We followed the PRISMA-ScR guidelines to retrieve peer-reviewed publications in  
22 English from 10 databases about COVID-19 vaccine hesitancy, refusal, acceptance,  
23 and access in sub-Saharan Africa.  
24  
25
- 26 • The scoping review was guided assisted by a university librarian with expertise in  
27 scoping reviews.  
28  
29
- 30 • The scoping review process allowed us synthesize and map current evidence, to  
31 provide a broad picture of how relatively few studies have so far have measured issues  
32 related to COVID-19 vaccine access, especially in combination with vaccine  
33 hesitancy, refusal, and acceptance.  
34  
35
- 36 • The decision to exclude grey literature (conference proceedings, reports, opinion  
37 pieces, commentaries) and non-English language texts in our analysis) may have  
38 limited the data that was available to us.  
39  
40  
41  
42  
43  
44  
45  
46  
47  
48  
49  
50  
51  
52  
53  
54  
55  
56  
57  
58  
59  
60

## INTRODUCTION

In 2019, the World Health Organization (WHO) listed *vaccine hesitancy* among 10 threats to global health. Predating the advent of the COVID-19 pandemic, this announcement defined vaccine hesitancy as “the reluctance or refusal to vaccinate despite the availability of vaccines” and pointed to the complex issues underscoring why people might not get vaccinated, such as “complacency, inconvenience in accessing vaccines, and lack of confidence”<sup>[1]</sup>. Social and behavioral health scientists researching vaccine hesitancy and *vaccine uptake*—whether people get vaccinated or not—have long been working on these questions, with a systematic review from a global perspective arguing that there is no “universal algorithm” (p. 2155) and that the determinants of vaccine hesitancy are complex, context-specific and vary across time, place, and vaccine<sup>[2]</sup>. A fundamental message to adequately understand and address *under-immunization*, or vaccination rates that do not meet public health targets, is that vaccine hesitancy as a determinant for vaccine uptake needs to be disentangled from other determinants unrelated to people’s reluctance to vaccinate. Bedford et al. 2018, for example, explain how hesitancy can be “used inaccurately as the explanation for under-vaccination in a population when the causes are related to pragmatics, competing priorities, access, or the failure of services or policies” (p. 6656)<sup>[3]</sup>.

Before the COVID-19 pandemic began, research on determinants of vaccine uptake had typically been conducted in high-income countries (HICs) with developed healthcare systems and overall regular and dependable access to vaccination for eligible populations. Much of this research focused on parental vaccine hesitancy and pointed to vaccine refusal in HICs as a privileged parenting practice, noting how parents who

1  
2  
3 refused vaccination counted on having adequate access to medical care should their non-  
4  
5 or under-vaccinated children fall ill from vaccine preventable diseases<sup>[4-6]</sup>. Other studies  
6  
7 from HICs have pointed to some parents' adherence to alternative conceptions of health,  
8  
9 complementary medicine, and neoliberal parenting practices as influencing factors for  
10  
11 vaccine hesitancy and vaccine refusal<sup>[7-15]</sup>. Some studies in these settings have  
12  
13 particularly focused on the important roles healthcare professionals play in parents'  
14  
15 vaccine decision-making process, citing children's doctors as the most important and  
16  
17 trusted source of vaccination information<sup>[15-19]</sup>.

21  
22 Comparatively fewer social and behavioral vaccine attitude and uptake studies had been  
23  
24 conducted in LMICs than in HICs before the COVID-19 pandemic. Such studies tended  
25  
26 to focus on lack of education, inequality, and access issues, rumors about vaccination,  
27  
28 and 'non-biomedical' approaches to medicine in these countries as determinants of  
29  
30 parents' vaccination decisions<sup>[2 20 21]</sup>. However, research has been increasing in LMICs,  
31  
32 with a particular focus on COVID-19 vaccine attitudes and uptake, both in anticipation of  
33  
34 and following the arrival of safe and effective vaccines.

37  
38 Our focus is sub-Saharan Africa (SSA), where healthcare systems are characterized by  
39  
40 three distinctive features: (1) high disease burden, (2) inadequate resources, and (3)  
41  
42 challenges related to leadership and governance. These three features influence public  
43  
44 access to health care, including quality of service delivery, and how systems respond to  
45  
46 mundane events and crises such as epidemic outbreaks. Firstly, SSA healthcare systems  
47  
48 are not only strongly affected by a high burden of communicable diseases (e.g. HIV,  
49  
50 tuberculosis, malaria, and diarrheal diseases), non-communicable diseases (e.g. heart  
51  
52 disease, obesity, diabetes, and mental illness), maternal and child mortality, but also  
53  
54  
55  
56  
57  
58  
59  
60

1  
2  
3 grapple with illnesses arising from climate change and environmental pollution and  
4  
5 violence-related injuries both at interpersonal levels and in the context of conflict in fragile  
6  
7 states [22-24]. Secondly, relative to healthcare systems in HICs, SSA healthcare systems  
8  
9 are under-resourced with regards to health care workers, physical infrastructure and  
10  
11 facilities, and financial resources with glaring disparities in access to health care based  
12  
13 on geographical areas (rural vs. urban) and socio-economic strata [22-24]. A recent report  
14  
15 on public health care in SSA indicated that 1 in 6 people live more than 2 hours away  
16  
17 from their nearest public hospital while 1 in 8 people live 1 hour or more away from their  
18  
19 closest health center<sup>[25]</sup>. Thirdly, challenges related to leadership and governance stem  
20  
21 from a combination of historical and political factors in post-independence countries as  
22  
23 governments have sought to develop healthcare systems, a period characterized by  
24  
25 health reforms, economic instability and subsequent structural adjustment sanctions  
26  
27 introduced by international donors such as The World Bank and the International  
28  
29 Monetary Fund<sup>[26]</sup>. Governments' inability to finance healthcare systems has culminated  
30  
31 in the growth of public-private partnerships (PPPs), where governments contract non-  
32  
33 state providers to assist in health care provision as a means of expanding access to health  
34  
35 care particularly in marginalized areas<sup>[27]</sup>.

36  
37  
38 The COVID-19 pandemic and resulting mitigation measures have exacerbated existing  
39  
40 healthcare system challenges, causing significant strain on the limited available  
41  
42 resources, which has resulted in poor health outcomes. For instance, strict lockdowns in  
43  
44 many SSA countries disrupted provision non-COVID related health services, led to loss  
45  
46 of livelihoods and economic recession [28 29], and low levels of trust in governments'  
47  
48 responses to the crisis. Existing socio-economic disparities have served as barriers in  
49  
50  
51  
52  
53  
54  
55  
56  
57  
58  
59  
60

1  
2  
3 adherence to COVID-19 prevention protocols<sup>[29]</sup>. An analysis of demographic health  
4 surveys in 16 SSA countries revealed that only 33.5% of households had water and soap  
5 available to support handwashing practices, with greater access in urban compared to  
6 rural areas<sup>[30]</sup>. For instance, approximately only 25% of South Africans from the poorest  
7 quintile and close to 40% of rural citizens had access to soap and water<sup>[30]</sup>. Similarly, in  
8 the context of abject poverty and food insecurity more so during the hard lockdown, the  
9 threat of COVID-19 has obscured socio-economic challenges<sup>[31]</sup>.

19 COVID-19 vaccination has featured prominently in discussions globally as well as in SSA.  
20 Scholars have noted that whereas such discussions have focused on procurement,  
21 supply and financing of vaccines<sup>[32]</sup>, there is a specific need for engagement with COVID-  
22 19 vaccine hesitancy <sup>[28 33]</sup>. There is a strong need for a nuanced understanding of specific  
23 contexts and barriers to COVID-19 vaccine uptake given the existing evidence of varying  
24 rates of both vaccine hesitancy and uptake reported in various SSA countries<sup>[33-37]</sup>. A  
25 concise narrative review of global literature reported varying degrees of COVID-19  
26 vaccine hesitancy and acceptance, with high vaccine hesitancy prevalence reported in  
27 West and Central Africa<sup>[38]</sup>. Furthermore, COVID-19 vaccine uptake has lagged  
28 considerably in sub-Saharan Africa compared to other regions globally<sup>[39]</sup>. Particularly,  
29 given the striking healthcare system disparities between HICs and LMICs, it is essential  
30 to understand the underlying determinants of COVID-19 vaccine uptake in a way that  
31 allows for a nuanced distinction between uptake as it relates to vaccine attitudes and  
32 uptake as it relates to access issues.

## Objective

The primary objective of this scoping review was to identify, describe and map the operationalization and measurement of COVID-19 vaccine hesitancy, refusal, acceptance and access as these relate to COVID-19 vaccine uptake in SSA. To our knowledge, limited research has so far attempted to disentangle COVID-19 vaccine attitudes from COVID-19 vaccine access issues as determinants of COVID-19 vaccine uptake in SSA. Therefore, this scoping review seeks to address the following research question: *How have researchers operationalized and measured vaccine hesitancy and vaccine access as these variables relate to COVID-19 vaccine uptake in sub-Saharan Africa?*

## METHODS

This scoping review was informed by Levac et al. 2010<sup>[40]</sup> version of Arksey and O'Malley's (2005) framework for scoping reviews<sup>[41]</sup> and the scoping review methodology of the Joanna Briggs Institute<sup>[42 43]</sup>. The Preferred Reporting Items for Systematic Reviews and Meta-Analyses extension (PRISMA) for Scoping Reviews<sup>[44 45]</sup> was utilized to guide evidence gathering and as a template to present the evidence retrieval process. There is no review protocol for this scoping review.

## Eligibility criteria

### *Concept*

Data sources with information on COVID-19 vaccination, vaccine hesitancy, acceptance, refusal, vaccine access, and/or vaccine uptake were included in this review. Studies that did not include any of the listed thematic areas were excluded. Studies authored in English were included while all non-English articles were excluded.

### *Context*

Articles included in this review were either fully or partially sub-Saharan African (SSA) based, for example, multi-country studies which included both SSA and non-SSA countries. All studies included were published during the COVID-19 pandemic. Non-SSA studies and pre-COVID studies were excluded.

### *Types of evidence sources*

We included peer-reviewed, full-text journal articles comprising primary, empirical studies, and reviews. Qualitative, quantitative, and/or mixed methods studies were included. The following categories of sources were excluded: abstract only; full text not available; non-peer-reviewed articles; grey literature (conference proceedings, reports, opinion pieces, commentaries).

### **Search strategy and study selection**

On March 9, 2022, a research librarian and two study authors (MJD and JG) collaboratively developed and refined the search strategy to include peer-reviewed articles in English that measured COVID-19 vaccine hesitancy, acceptance, refusal, and access in sub-Saharan Africa. We excluded grey literature, such as conference proceedings, reports, opinion pieces, and commentaries. The search strategy included the following search terms: “COVID-19” OR “coronavirus 2019” OR “SARS-CoV-2” OR “SARS-2” OR “severe acute respiratory syndrome coronavirus 2”, “vaccination hesitancy” OR “vaccine hesitancy” OR “vaccine refusal” OR “vaccination refusal” OR “vaccine access” OR “access” OR “sub-Saharan Africa.” The search term “sub-Saharan Africa” was used to capture studies conducted within this region. We did not include a date filter as we expected that studies related to COVID-19 would be published during the period



1  
2  
3 of the pandemic. A total of 10 databases were searched for relevant articles: PubMed,  
4  
5 Scopus, Web of Science, Cochrane, Academic Search Premier, MEDLINE, Cumulative  
6  
7 Index to Nursing and Allied Health Literature (CINAHL), Health Source Nursing, Africa  
8  
9 Wide and APA PsychInfo. The search strategy was first used in PubMed and adapted for  
10  
11 use in the remaining nine databases and is presented in “Supplementary file 1.” Articles  
12  
13 from all 10 databases were exported to EndNote and duplicates removed. MJD and JG  
14  
15 manually searched reference lists of articles retrieved from the databases for additional  
16  
17 relevant articles. They then screened all articles, removing duplicates undetected by  
18  
19 EndNote and articles with content falling outside of the scope of the review.  
20  
21  
22

23  
24 The process of abstract and title screening, based on the inclusion criteria, commenced  
25  
26 with both reviewers piloting CINAHL and APA Psychoinfo databases together.  
27  
28 Disagreements were discussed and resolved through consensus among authors. The  
29  
30 remaining articles and databases were then randomly divided into two and each of the  
31  
32 reviewers assigned one sub-set of articles for independent title and abstract screening.  
33  
34 All articles which met the inclusion criteria were selected for full text review. Some of the  
35  
36 articles selected for full review were excluded during full text review screening.  
37  
38  
39

#### 40 **Data extraction**

41  
42 Authors (MJD and JG) created a data extraction form and independently conducted pilot  
43  
44 data extraction on nine randomly selected articles. Following pilot data extraction, the  
45  
46 data extraction form was refined to include:  
47  
48

- 49 1) General descriptive data, namely the article reference number in EndNote, year of  
50 publication, author(s), publication title, aim, study population, country/countries  
51  
52
- 53 2) Data on methods, such as types of studies, measurement scales and tools utilised  
54  
55  
56  
57  
58  
59  
60

- 3) Sociodemographic details of participants included in the selected studies
- 4) Study measurement tools and operationalisation of vaccine hesitancy, vaccine acceptance, vaccine refusal, vaccine access, and vaccine uptake

### **Patient and public involvement**

As this was a scoping review, patients and the public were not involved in the design, conduct, reporting, or dissemination plans of our research.

### **RESULTS**

A total of 3916 articles were retrieved from database searches in Academic Search Premier (n=558), Africa Wide (n=219), APA Psycinfo (n=64), CINAHL (n=127), Cochrane (n=0), Health Source Nursing (n=83), MEDLINE (n=873), PubMed (n=612), Scopus (n=1205), Web of Science (n=175). Additional articles were manually sourced from reference lists of articles from databases (n=10), yielding a total of 3926 articles. Of these, 665 duplicate records were identified by EndNote and removed. The remaining 3261 articles were screened for eligibility and of these, 3151 articles were excluded. A total of 110 full text articles were sought for retrieval of which four were not available in full text. Of the 106 full text articles evaluated, 72 studies met the inclusion criteria and were included in this review. The study selection process is captured in a PRISMA flow diagram (Figure 1). The document "Supplementary file 2" includes a list of authors, titles, journal, and abstracts of the 72 studies reviewed in the scoping review.

[Insert Figure 1: PRISMA Flow Diagram]

### **Characteristics of studies included**

The 72 full text articles reviewed included comprised of cross-sectional studies (n=62), systematic reviews (n=4), qualitative studies (n=3), mixed methods studies (n=2), and

sentiment analysis (n=1). The articles reviewed were comprised of data from 58 single country studies and 14 multiple country studies. Not all countries among those listed in the search term for sub-Saharan Africa appeared in the 72 articles we reviewed. Of the 58 single country studies, 20 were from Ethiopia, 12 from Nigeria, 6 studies each from Ghana and South Africa, 2 studies each from Kenya, Zimbabwe, Democratic Republic of the Congo and Somalia, and 1 study each from Mozambique, Zambia, Togo and Cameroon (Table 1). A visual map of all the SSA countries featured in the 72 studies reviewed is presented in Figure 2.

**Table 1: Countries Included in Reviewed Studies**

| <b>Countries</b>                 | <b>Number of studies</b> |
|----------------------------------|--------------------------|
| Ethiopia                         | 20                       |
| Nigeria                          | 12                       |
| Ghana                            | 6                        |
| South Africa                     | 6                        |
| Uganda                           | 2                        |
| Kenya                            | 2                        |
| Zimbabwe                         | 2                        |
| Democratic Republic of the Congo | 2                        |
| Somalia                          | 2                        |
| Mozambique                       | 1                        |
| Zambia                           | 1                        |
| Togo                             | 1                        |
| Cameroon                         | 1                        |
| Multiple country studies*        | 14                       |
| <b>Total</b>                     | <b>72</b>                |

\* Additional SSA countries included in multiple-country studies were Angola, Benin, Burkina Faso, Cape Verde, Côte d'Ivoire, Gambia, Guinea, Guinea-Bissau, Lesotho, Malawi, Mali, Rwanda, São Tomé & Príncipe, Senegal, Sierra Leone, Sudan, and Tanzania.

[Insert Figure 2: Map of Countries Included in Reviewed Studies]

Study populations in the 72 reviewed studies comprised general adult populations (n=28), specific adult populations (n=21) including university students, schoolteachers,

1  
2  
3 chronically ill persons, pregnant women, fully and partially vaccinated adults, mothers,  
4 adult caregivers, and informal traders, and healthcare workers (n=16). Others (n=7)  
5  
6 combined two or more populations segments, for instance, schoolteachers and bank  
7  
8 workers in one study and program personnel, healthcare workers and community  
9  
10 members in another. The main sociodemographic variables captured in the reviewed  
11  
12 studies included age, sex, marital status, ethnicity, education, religion, residence,  
13  
14 employment status, work category, general health status and, in a few instances, chronic  
15  
16 illness status.  
17  
18  
19  
20

## 21 **Operationalization and measurements of vaccine hesitancy, vaccine acceptance,** 22 **and vaccine refusal** 23

24  
25  
26 We identified different ways researchers operationalized and measured the outcome  
27  
28 variables of vaccine hesitancy, vaccine acceptance, and vaccine refusal and grouped  
29  
30 them into five categories: (1) measurements of willingness to vaccinate (n=32, 44.4%),  
31  
32 (2) measurements of intention to vaccinate (n=26, 36.1%), (3) multiple measurements  
33  
34 (n=7, 9.7%), (4) uptake measurements (n=4, 5.6%), and (5) qualitative approaches (n=3,  
35  
36 4.2%). We describe these categories in further detail below. We do not provide additional  
37  
38 details on operationalization of the uptake measurement because it is used as a proxy for  
39  
40 measuring assumed COVID-19 vaccine acceptance in these studies<sup>[46-49]</sup>.  
41  
42  
43

### 44 *Willingness to vaccinate* 45

46  
47 The most frequently occurring operationalization of vaccine hesitancy, acceptance, and  
48  
49 refusal was willingness to vaccinate against COVID-19 (n=32, 44.4%). Among these  
50  
51 studies, 21 included items for which possible responses were “Yes,” “No,” or “Do not  
52  
53 know/Unsure.” For example, Tobin et al. 2021 asked study respondents, “Would you be  
54  
55  
56  
57  
58  
59  
60

1  
2  
3 willing to accept a COVID-19 vaccine when one becomes available in the country?” (p.  
4 54)<sup>[50]</sup>. In six studies, researchers included Likert scale responses, such as Addo et al.  
5  
6 2021 who asked, “How willing are you to take a COVID-19 vaccine?” (p. 5065)<sup>[51]</sup>. In four  
7  
8 studies, researchers added a cost-related condition to the item to measure participants’  
9  
10 willingness to pay for a COVID-19 vaccine. Kanyanda et al. 2021, for instance, asked  
11  
12 participants, “If an approved vaccine to prevent coronavirus was available right now at no  
13  
14 cost, would you agree to be vaccinated?” (p. 2)<sup>[52]</sup>. In one study, researchers asked  
15  
16 participants if they would be willing to take the COVID-19 vaccine if it was recommended  
17  
18 by a health worker or health agency<sup>[53]</sup>.

### 23 24 *Intention to vaccinate*

25  
26 We identified intention to vaccinate as a measurement of vaccine hesitancy, acceptance,  
27  
28 and refusal in 26 (36.1%) of the 72 studies. Among these, 13 included responses for  
29  
30 which possible responses were “Yes,” “No,” or “Do not know/Unsure.” For instance,  
31  
32 Abebe et al. 2021 asked respondents, “Did you have an intention to accept COVID-19  
33  
34 vaccine if it is available in the future?” (p. 2018)<sup>[54]</sup>. In 10 studies, researchers included  
35  
36 Likert scale responses. For example, Wiysonge et al. 2022 asked study participants to  
37  
38 rate their level of agreement on a scale from 1 to 7 (1=strongly disagree, 7=strongly  
39  
40 agree) for the statement “I will take the COVID-19 vaccine when one becomes available”  
41  
42 (p. 3)<sup>[55]</sup>. Researchers included cost-related conditions to measure participants’ intention  
43  
44 to vaccinate in 2 studies, including Mekonnen et al. 2022 who asked, “Are you intending  
45  
46 to get vaccinated against COVID-19 if available without any cost?” (p. 3)<sup>[56]</sup>.

### 51 52 *Multiple measurements*

1  
2  
3 Seven studies (9.7%) included multiple measurements to operationalize vaccine  
4 hesitancy, acceptance, and refusal. Chinawi et al. 2021 measured mothers' willingness  
5 to receive the COVID-19 vaccination as well as their willingness to vaccinate their children  
6 with the COVID-19 vaccine<sup>[57]</sup>. Yilma et al. 2022 asked healthcare workers in Ethiopia if  
7 they would get vaccinated if a COVID-19 vaccine was available and proven safe and  
8 effective, and if they would recommend their patients to get vaccinated for COVID-19<sup>[58]</sup>.  
9  
10 Sallam 2021<sup>33</sup> conducted a concise systematic review of vaccine acceptance rates and  
11 classified acceptance by considering intention to accept, likelihood of vaccination,  
12 willingness to accept a vaccine, endorsement of Oxford Scale<sup>[59]</sup>, and level of agreement  
13 with vaccination acceptance. In a pre-vaccination rollout survey in Ghana, Alhassan et al.  
14  
15 2021 measured respondents' willingness to participate in a COVID-19 vaccine trial and  
16 their willingness to take the vaccine. The three remaining studies used multiple items to  
17 operationalize vaccine sentiment<sup>[60]</sup> and vaccine acceptance<sup>[61 62]</sup> but did not explicitly  
18 describe the procedure in full detail.

### 35 *Qualitative approaches*

36  
37 Three studies (4.7%) employed qualitative approaches. Wonodi et al. 2022 conducted  
38 focus group discussions and key informant interviews to elicit and thematically analyze  
39 COVID-19 vaccine conspiracy theories and misinformation, which they contended may  
40 result in "highly disruptive vaccine hesitancy and refusal" (p. 2115)<sup>[63]</sup>. Shiferie et al. 2021  
41 used WHO's SAGE working group definition of vaccine hesitancy ("delay in acceptance  
42 or refusal of vaccination despite availability of vaccination services" (p. 4163)<sup>[64]</sup>) in their  
43 analysis of 20 qualitative interviews with healthcare providers<sup>[65]</sup>. In their analysis of  
44 documentary, social media and policy analysis, participant observation, ethnography  
45  
46  
47  
48  
49  
50  
51  
52  
53  
54  
55  
56  
57  
58  
59  
60

1  
2  
3 involving informal interviews, and observations, Leach et al. 2022<sup>63</sup> used the Vaccine  
4 Anxieties Framework<sup>[20]</sup> and argued that it allows for “exploration of who, in which  
5 contexts, really does want Covid vaccines, and may be worried about not getting them”  
6  
7  
8  
9  
10 (p. 2).

## 11 **Operationalizations and measurements of access to COVID-19 vaccination**

12  
13  
14 Out of the 72 reviewed studies, 16 (22.2%) included operationalizations of access issues  
15 related to obtaining COVID-19 vaccines. We grouped these operationalizations into 5  
16 categories: (1) measurements of cost and affordability (n=13, 18.1%), (2) measurements  
17 of convenience (n=6, 8.3%), (3) measurements of distance or time to travel or time waiting  
18 for a vaccine (n=3, 4.2%), (4) measurements of comfort (n=1, 1.4%), and (5) qualitative  
19 approaches (n=1, 1.4%). Of these 16 studies, 9 included measurements of access from  
20 more than 1 of these categories.  
21  
22  
23  
24  
25  
26  
27  
28  
29

### 30 *Cost and affordability*

31  
32  
33 For the measurements of cost and affordability category, 8 of the 13 studies included only  
34 a cost and affordability measurement as an operationalization of access. The other 5  
35 included additional access items that fell into the other categories. Some of these cost  
36 and affordability questions were the same questions discussed above in the willingness  
37 and intention to vaccinate measurements (i.e. “If an approved vaccine to prevent  
38 coronavirus was available right now at no cost, would you agree to be vaccinated” (p.  
39 2)<sup>[52]</sup>). Others asked questions about preferences for free vaccines or asked participants  
40 to indicate how much they would be willing to pay for a vaccine. Anjorin et al. 2021, for  
41 example, asked participants to indicate their level of agreement with the following  
42 statement: “If there is a vaccine available for coronavirus, I believe it should be free” (S1  
43  
44  
45  
46  
47  
48  
49  
50  
51  
52  
53  
54  
55  
56  
57  
58  
59  
60

1  
2  
3 File)<sup>[66]</sup>. The same researchers provided the statement, “I consider [----] to be a  
4 reasonable price range for the coronavirus vaccine” to participants and asked them to  
5 choose from the following options: (1) \$1-3, (2) \$4-6, (3) \$7-9, (4)  $\geq$  \$10 (S1 File).  
6  
7

### 8 9 10 *Convenience*

11  
12 We found measurements of convenience as they relate to COVID-19 vaccine acquisition  
13 in 6 studies. Three of these studies asked respondents about general difficulty in  
14 accessing vaccination sites. For instance, Orangi et al. 2021 asked if participants found  
15 vaccination sites hard to access<sup>[67]</sup>. Katoto et al. 2022 conducted a study in South Africa  
16 and asked respondents about their ability to access to the online vaccine registration  
17 platform, which has implications for vaccine access pragmatics<sup>[68]</sup>. Wiysonge et al. 2022  
18 asked participants about their level of agreement with the statement, “For me, it is  
19 inconvenient to receive vaccinations against Covid-19” (p. 3)<sup>[55]</sup>. Anjorin et al. 2021 asked  
20 respondents if they would prefer community workers to come to their house or place of  
21 work to give the coronavirus vaccine, as opposed to going to a health center (S1 File)<sup>[66]</sup>.  
22  
23  
24  
25  
26  
27  
28  
29  
30  
31  
32  
33  
34

### 35 *Distance and time to travel or time waiting for a vaccine*

36  
37 Three studies in total included items about distance/time to travel or time waiting for a  
38 vaccine. Davis et al. 2022 explain how “self-reported distance and waiting times in queue  
39 were used as a means of measuring perceived access to vaccine” (p. 12)<sup>[61]</sup>. Tobin et al.  
40 asked respondents if they were willing to travel for more than one hour to get a COVID-  
41 19 vaccine<sup>[50]</sup>. Anjorin et al. 2021 ask two similar questions about typical travel time to  
42 nearest health centers and the amount of time participants would be willing to travel to  
43 get the coronavirus vaccine<sup>[66]</sup>.  
44  
45  
46  
47  
48  
49  
50  
51  
52

### 53 *Comfort*



1  
2  
3 One study included a question about comfort as a measurement related to COVID-19  
4 vaccine access. Wiysonge et al. 2022 asked participants about their level of agreement  
5 with the statement “Visiting the vaccination clinic will make me feel uncomfortable; this  
6 will keep me from getting vaccinated against Covid-19” (p. 3)<sup>[55]</sup>.  
7  
8  
9

### 10 11 12 *Qualitative approaches*

13  
14 One of the 72 studies included qualitative approaches to operationalize COVID-19  
15 vaccine access. In this study, Leach et al. 2022 posit a link between vaccine-related  
16 anxiety and access to vaccines based on the availability and equity of resources and  
17 observe how the issue of vaccine access is more intricate and unpredictable than  
18 presented in ongoing global debates about vaccination<sup>[69]</sup>.  
19  
20  
21  
22  
23  
24  
25

### 26 **Identified gaps**

27  
28 The results of this scoping review allowed us to identify gaps in the current research on  
29 COVID-19 vaccine hesitancy, vaccine acceptance, vaccine refusal, and vaccine access  
30 in sub-Saharan Africa. We have identified three main gaps in this research: (1) a small  
31 proportion of studies investigating issues of COVID-19 vaccine access as a determinant  
32 of vaccine uptake, (2) a lack of standardized, homogeneous approaches to measuring  
33 COVID-19 vaccine hesitancy, vaccine acceptance, vaccine refusal, and vaccine access,  
34 and (3) a lack of country-wide representative studies.  
35  
36  
37  
38  
39  
40  
41  
42  
43

44 A major gap in the literature became apparent when we considered the surprisingly low  
45 number of studies (n=16, 22.2%) that included study items aimed at measuring COVID-  
46 19 vaccine access. Almost all studies included measurements related to cost and  
47 affordability of the vaccine, while very few considered obstacles individuals might face as  
48 barriers to receiving a COVID-19 vaccine, such as accessing online vaccine registration  
49  
50  
51  
52  
53  
54  
55  
56  
57  
58  
59  
60

1  
2  
3 platforms, travel distance and waiting times to reach vaccination centers or sites, and  
4  
5 comfort when visiting vaccination clinics.  
6

7  
8 We also identified heterogeneous research approaches to measuring vaccine hesitancy,  
9  
10 acceptance, refusal, and uptake. The variety of approaches used by researchers  
11  
12 throughout SSA likely reflects the difficulties involved when attempting to operationalize  
13  
14 admittedly complex phenomena. Similarly, the use of a variety of tools and measurements  
15  
16 renders cross-country comparison challenging.  
17  
18

19  
20 Results of this scoping review also showed that there were relatively few studies that  
21  
22 provided country-wide, representative results. Rather, many studies were institution-  
23  
24 based, convenience samples or included non-random samples via questionnaires  
25  
26 conducted online.  
27  
28  
29

## 30 31 **DISCUSSION**

32  
33 Research on COVID-19 vaccine hesitancy, acceptance, refusal, and uptake in sub-  
34  
35 Saharan Africa has been heterogeneous in terms of study sample populations, study  
36  
37 settings, study designs, and measurement tools. This is not surprising given the fast-  
38  
39 changing nature of the COVID-19 pandemic. This was also coupled with the urgent and  
40  
41 complex mass vaccination rollout efforts designed to immunize the highest number of  
42  
43 eligible individuals possible in resource-limited settings. This scoping review has  
44  
45 described the diversity of this research and showed a considerable amount of research  
46  
47 about COVID-19 vaccine hesitancy, acceptance, and refusal. Nonetheless, few of these  
48  
49 studies have included explicit measurements of access to COVID-19 vaccination.  
50  
51  
52  
53  
54  
55  
56  
57  
58  
59  
60

1  
2  
3 Some of the above-mentioned gaps are likely a result, in part, of the reviewed studies'  
4 overall limited engagement with and use of research tools and measurement scales which  
5 pre-dated the COVID-19 pandemic. Further consideration of these sources in the study  
6 design process would likely have allowed researchers to address some of these gaps.  
7

8  
9  
10 Several studies did nonetheless adapt literature and models pre-existing the COVID-19  
11 pandemic for use in the context of COVID-19 vaccination. Anjorin et al. 2021<sup>[66]</sup>, for  
12 example, referenced a 2014 WHO Strategic Advisory Group of Experts on Immunization  
13 (SAGE) report<sup>[70]</sup>, describing the “3Cs Model” which includes the concepts of *confidence*,  
14 *complacency*, and *convenience*. Anjorin et al. 2021’s utilization of the 3Cs model likely  
15 prompted them to include items designed to measure variables related to COVID-19  
16 vaccine access, notably through use of the concept *convenience*.  
17

18  
19 [Wiysonge, et al. <sup>55]</sup> explicitly stated that their study questionnaire was informed by the  
20 5C scale from Betsch et al. 2018 <sup>[71]</sup>, which is an adaptation of SAGE’s 3Cs model. The  
21 5C scale measures five psychological antecedents of vaccination: *confidence*,  
22 *complacency*, *constraints*, *rational calculations of pros and cons*, and *collective*  
23 *responsibility*. Wiysonge et al.’s use of the 5C scale allowed the researchers to include  
24 questions related to intention to vaccinate against COVID-19, convenience of getting  
25 vaccinated, and comfort in going to vaccination clinics, -. It is notable that there is also  
26 now a 7C model that additionally includes measurements of *compliance* and  
27 *conspiracy*<sup>[72]</sup>.  
28

29  
30  
31 Katoto et al. 2022 used the WHO and United Nations Children’s Fund (UNICEF)’s  
32 Behavioral Social Drivers of COVID-19 vaccination (BeSD) tool<sup>[73]</sup> to inform the  
33 development of data collection tools for their study. The BeSD tool assesses four domains  
34  
35  
36  
37  
38  
39  
40  
41  
42  
43  
44  
45  
46  
47  
48  
49  
50  
51  
52  
53  
54  
55  
56  
57  
58  
59  
60

1  
2  
3 related to vaccine uptake: (1) what people think and feel about vaccinations, (2) social  
4 processes promoting or hindering vaccination, (3) individual motivations to seek  
5 vaccination, and (4) practical elements involved in obtaining and getting immunization.  
6  
7  
8  
9  
10 Katoto et al. 2022 noted that the BeSD has limited use in LMICs, which prompted the  
11 research team to extensively adapt the tool for the South African context. Nonetheless,  
12 use of the BeSD tool in the study design facilitated the inclusion of an item related to  
13 practical elements involved in obtaining and getting immunization: access to the online  
14 vaccine registration platform.  
15  
16  
17  
18  
19  
20

21 Regarding our study objective to identify, describe, and map research measurement tools  
22 COVID-19 vaccine hesitancy, refusal, and acceptance and COVID-19 vaccine access in  
23 sub-Saharan Africa, our results show that all 72 reviewed studies included measurements  
24 of vaccine hesitancy, refusal, and/or acceptance. However, only 16 (22%) studies  
25 included at least one measurement of COVID-19 vaccine access. This important finding  
26 aligns with a trend developed during the COVID-19 pandemic whereby journalists,  
27 governments, policymakers, and researchers have increasingly used ‘vaccine hesitancy’  
28 as an explanation for why so many people remain unvaccinated, even in contexts where  
29 there are inadequate vaccine supplies or difficulties accessing vaccination services<sup>[74]</sup>. In  
30 effect, Attwell et al. 2022 observed that papers mentioning ‘vaccine’ or ‘vaccination’ in the  
31 title, as well as ‘hesitancy,’ increased from 3.3% in 2019 to 8.31% in 2021 (p.574). These  
32 authors argue that this increased focus on vaccine hesitancy “lets governments off the  
33 hook” by centering “too much of the responsibility for the success (or not) of a vaccination  
34 programme on individuals” (ibid).  
35  
36  
37  
38  
39  
40  
41  
42  
43  
44  
45  
46  
47  
48  
49  
50  
51  
52  
53  
54  
55  
56  
57  
58  
59  
60

1  
2  
3 Our search strategy has limitations. Our decision not to include grey literature, such as  
4 conference proceedings, reports, opinion pieces, and commentaries, and non-English  
5 texts in our review may have limited the available data. There may have been other  
6 measurements of vaccine hesitancy, refusal, or acceptance around COVID-19 vaccine in  
7 sub-Saharan Africa reported in the excluded literature and in languages other than  
8 English. It should also be noted that the search was conducted in March 2022, so there  
9 are likely additional publications that have become available since we conducted the  
10 scoping review.  
11  
12  
13  
14  
15  
16  
17  
18  
19  
20

21 Future research on COVID-19 vaccination in sub-Saharan Africa, and other LMIC settings  
22 for that matter, needs to prioritize the inclusion of access-related measurements.  
23  
24 Inclusion of access variables in future research will add an essential factor to the complex  
25 equation around determinants of vaccine uptake. More importantly, its inclusion will fill a  
26 current empirical blind spot around COVID-19 vaccine research in sub-Saharan Africa  
27 whose results have potential to provide insights into concrete, pragmatic, and actionable  
28 changes designed to make it easier for individuals to obtain COVID-19 vaccines.  
29  
30  
31  
32  
33  
34  
35  
36

## 37 **CONCLUSION**

38  
39  
40 This scoping review has described the heterogeneity in 72 reviewed studies about  
41 COVID-19 vaccine hesitancy, acceptance, refusal, and access in sub-Saharan Africa.  
42  
43 This heterogeneity was apparent in the distribution of countries included, the study  
44 designs, sample populations, measurements of vaccine hesitancy, acceptance, refusal,  
45 uptake, and access. Particularly, we have identified an important empirical blind spot in  
46 the literature regarding measurements of vaccine access. Future measurement tools can  
47 find inspiration from pre-existing scales, tools, and models used for the study of the  
48  
49  
50  
51  
52  
53  
54  
55  
56  
57  
58  
59  
60

1  
2  
3 determinants of vaccine uptake<sup>[64 70 71 73]</sup>, as was demonstrated in several of the 72 studies  
4  
5 reviewed in this scoping review. These research tools should nonetheless be adaptable  
6  
7 to capture the local realities specific to the diverse contexts represented in sub-Saharan  
8  
9 Africa and other LMICs.  
10  
11  
12  
13

14 **Acknowledgments** We would like to acknowledge the financial supported received from  
15  
16 the Leading House Africa Research Partnership Grant I and from the Swiss National  
17  
18 Science Foundation's sponsorship of MJD's Early Postdoc.Mobility Fellowship (Grant:  
19  
20 200180). We would like to thank Nahmla Madini who provided invaluable assistance and  
21  
22 support through her role as a librarian at the University of Cape Town's Bongani Mayosi  
23  
24 Health Sciences Library. Finally, we would like to thank Vladimir Jolidon and Lucia Knight  
25  
26 for their valuable inputs for revisions of the scoping review.  
27  
28  
29

### 30 **Collaborators**

31  
32 Vladimir Jolidon

33  
34 Lucia Knight

### 35 **Contributorship statement**

36  
37 Study authors MJD and JG worked together in sourcing funding for this project,  
38  
39 conceptualizing and designing the study, data collection and analysis, preparation, review  
40  
41 and editing the manuscript. Both authors read and approved the final version of the  
42  
43 manuscript for submission.  
44  
45  
46  
47  
48

49 **Funding** This work was supported by the Leading House Africa Research Partnership  
50  
51 Grant I and by the Swiss National Science Foundation's sponsorship of MJD's Early  
52  
53 Postdoc.Mobility Fellowship (Grant: 200180).  
54  
55  
56  
57  
58  
59

1  
2  
3 **Competing interests** None to declare.  
4

5 **Patient consent for publication** Patients were not involved in this study.  
6

7 **Ethics approval** This study was based entirely on a scoping review of relevant  
8  
9  
10 published literature and did not require an ethics approval.  
11

12 **Provenance and peer review** Not commissioned. Externally peer reviewed.  
13

14 **Data availability statement** Data supporting the findings of this study are available from  
15  
16 the corresponding author (MJD) on request.  
17

18 **Supplementary material** The document “Supplementary file 1” provides an overview of  
19  
20 the final search strategy. The document “Supplementary file 2” includes a list of the 72  
21  
22 studies reviewed in the scoping review.  
23  
24

## 25 26 REFERENCES

- 27  
28  
29 1. WHO. Ten threats to global health in 2019 2019 [Available from:  
30 <https://www.who.int/emergencies/ten-threats-to-global-health-in-2019> accessed  
31 February 18, 2019 2019.  
32  
33 2. Larson H, Jarrett C, Eckersberger E, et al. Understanding vaccine hesitancy around vaccines  
34 and vaccination from a global perspective: A systematic review of published literature,  
35 2007–2012. *Vaccine* 2014;32 doi: 10.1016/j.vaccine.2014.01.081  
36  
37 3. Bedford H, Attwell K, Danchin M, et al. Vaccine hesitancy, refusal and access barriers: The  
38 need for clarity in terminology. *Vaccine* 2018;36(44):6556-58. doi:  
39 <https://doi.org/10.1016/j.vaccine.2017.08.004>  
40  
41 4. Reich JA. Neoliberal Parenting, Future Sexual Citizens, and Vaccines Against Sexual Risk.  
42 *Sexuality Research and Social Policy* 2016;13(4):341-55. doi: 10.1007/s13178-016-0227-z  
43  
44 5. Reich JA. *Calling the Shots: Why Parents Reject Vaccines*. New York: New York University  
45 Press 2016.  
46  
47 6. Reich JA. Neoliberal Mothering and Vaccine Refusal: Imagined Gated Communities and the  
48 Privilege of Choice. *Gender & Society* 2014;28(5):679-704. doi:  
49 10.1177/0891243214532711  
50  
51 7. Sobo EJ. Social Cultivation of Vaccine Refusal and Delay among Waldorf (Steiner) School  
52 Parents. *Medical Anthropology Quarterly* 2015;29(3):381-99. doi: 10.1111/maq.12214  
53  
54 8. Sobo EJ. Salutogenic Education? Movement and Whole Child Health in a Waldorf (Steiner)  
55 School. *Medical Anthropology Quarterly* 2015;29(2):137-56. doi: 10.1111/maq.12140  
56  
57 9. Sobo EJ. THEORIZING (VACCINE) REFUSAL: Through the Looking Glass. *Cultural Anthropology*  
58 2016;31(3):342-50. doi: 10.14506/ca31.3.04  
59  
60

10. Sobo EJ, Huhn A, Sannwald A, et al. Information Curation among Vaccine Cautious Parents: Web 2.0, Pinterest Thinking, and Pediatric Vaccination Choice. *Medical Anthropology* 2016;35(6):529-46. doi: 10.1080/01459740.2016.1145219
11. Ward PR, Attwell K, Meyer SB, et al. Understanding the perceived logic of care by vaccine-hesitant and vaccine-refusing parents: A qualitative study in Australia. *PloS one* 2017;12(10):e0185955-e55. doi: 10.1371/journal.pone.0185955
12. Attwell K, Meyer SB, Ward PR. The Social Basis of Vaccine Questioning and Refusal: A Qualitative Study Employing Bourdieu's Concepts of 'Capitals' and 'Habitus'. *International journal of environmental research and public health* 2018;15(5):1044. doi: 10.3390/ijerph15051044
13. Attwell K, Smith DT, Ward PR. 'The Unhealthy Other': How vaccine rejecting parents construct the vaccinating mainstream. *Vaccine* 2018;36(12):1621-26. doi: <https://doi.org/10.1016/j.vaccine.2018.01.076>
14. Attwell K, Ward PR, Meyer SB, et al. "Do-it-yourself": Vaccine rejection and complementary and alternative medicine (CAM). *Social Science & Medicine* 2018;196:106-14. doi: <https://doi.org/10.1016/j.socscimed.2017.11.022>
15. Deml MJ, Buhl A, Huber BM, et al. Trust, affect, and choice in parents' vaccination decision-making and health-care provider selection in Switzerland. *Sociology of Health & Illness* 2021;n/a:1-18. doi: <https://doi.org/10.1111/1467-9566.13388>
16. Deml MJ, Buhl A, Notter J, et al. 'Problem patients and physicians' failures': What it means for doctors to counsel vaccine hesitant patients in Switzerland. *Social Science & Medicine* 2020;255:112946. doi: <https://doi.org/10.1016/j.socscimed.2020.112946>
17. Deml MJ, Jafflin K, Merten S, et al. Determinants of vaccine hesitancy in Switzerland: study protocol of a mixed-methods national research programme. *BMJ Open* 2019;9(11):e032218. doi: 10.1136/bmjopen-2019-032218
18. Ebi SJ, Deml MJ, Jafflin K, et al. Parents' vaccination information seeking, satisfaction with and trust in medical providers in Switzerland: a mixed-methods study. *BMJ Open* 2022;12(2):e053267. doi: 10.1136/bmjopen-2021-053267
19. Benin AL, Wisler-Scher DJ, Colson E, et al. Qualitative analysis of mothers' decision-making about vaccines for infants: the importance of trust. *American Academy of Pediatrics* 2006;117(5):1532-41.
20. Leach M, Fairhead J. *Vaccine Anxieties: Global Science, Child Health and Society*. Oxfordshire: Routledge 2007:216.
21. Larson H. *Stuck: How Vaccine Rumors Start—and Why They Don't Go Away*. Seattle: Oxford University Press 2020:184.
22. Agyepong IA, Sewankambo N, Binagwaho A, et al. The path to longer and healthier lives for all Africans by 2030: the Lancet Commission on the future of health in sub-Saharan Africa. *The Lancet* 2017;390(10114):2803-59.
23. Mash R, Howe A, Olayemi O, et al. Reflections on family medicine and primary healthcare in sub-Saharan Africa: *BMJ Specialist Journals*, 2018.
24. TheEconomist. *The future of healthcare in Africa*: Health Systems Trust, 2011.
25. Falchetta G, Hammad AT, Shayegh S. Planning universal accessibility to public health care in sub-Saharan Africa. *Proceedings of the National Academy of Sciences* 2020;117(50):31760-69.



- 1  
2  
3 26. Streefland P. Public health care under pressure in sub-Saharan Africa. *Health Policy*  
4 2005;71(3):375-82.  
5  
6 27. Whyle E, Olivier J. Models of engagement between the state and the faith sector in sub-  
7 Saharan Africa—a systematic review. *Development in Practice* 2017;27(5):684-97.  
8  
9 28. Dzinamarira T, Nachipo B, Phiri B, et al. COVID-19 vaccine roll-out in South Africa and  
10 Zimbabwe: urgent need to address community preparedness, fears and hesitancy.  
11 *Vaccines* 2021;9(3):250.  
12  
13 29. Hartwig R, Hoffmann L. Challenging Trust in Government: COVID in Sub-Saharan Africa.  
14 2021  
15  
16 30. Jiwani SS, Antiporta DA. Inequalities in access to water and soap matter for the COVID-19  
17 response in sub-Saharan Africa. *International journal for equity in health* 2020;19:1-3.  
18  
19 31. Powell A. Rural COVID, urban COVID. Africa sees sharp divide. *Voice of America News Online*  
20 2021 21 March 2021.  
21  
22 32. Basak P, Abir T, Al Mamun A, et al. A Global Study on the Correlates of Gross Domestic  
23 Product (GDP) and COVID-19 Vaccine Distribution. *Vaccines* 2022;10(2) doi:  
24 10.3390/vaccines10020266  
25  
26 33. Sallam M. COVID-19 vaccine hesitancy worldwide: a concise systematic review of vaccine  
27 acceptance rates. *Vaccines* 2021;9(2):160.  
28  
29 34. Acheampong T, Akorsikumah EA, Osaekwapong J, et al. Examining Vaccine Hesitancy in  
30 Sub-Saharan Africa: A Survey of the Knowledge and Attitudes among Adults to Receive  
31 COVID-19 Vaccines in Ghana. *Vaccines* 2021;9(8):814.  
32  
33 35. Dinga JN, Sinda LK, Titanji VP. Assessment of vaccine hesitancy to a COVID-19 vaccine in  
34 Cameroonian adults and its global implication. *Vaccines* 2021;9(2):175.  
35  
36 36. Tulloch O, Roldan de Jong T, Bardosh K. Data Synthesis: COVID-19 Vaccine Perceptions in  
37 Sub-Saharan Africa: Social and Behavioural Science Data, March 2020-April 2021. 2021  
38  
39 37. Nachega JB, Sam-Agudu NA, Masekela R, et al. Addressing challenges to rolling out COVID-  
40 19 vaccines in African countries. *Lancet Glob Health* 2021;9(6):e746-e48. doi:  
41 10.1016/s2214-109x(21)00097-8 [published Online First: 2021/03/14]  
42  
43 38. Sallam M, Al-Sanafi M, Sallam M. A Global Map of COVID-19 Vaccine Acceptance Rates per  
44 Country: An Updated Concise Narrative Review. *J Multidiscip Healthc* 2022;15:21-45.  
45 doi: 10.2147/jmdh.S347669 [published Online First: 2022/01/21]  
46  
47 39. NYTimes. Tracking Coronavirus Vaccinations Around the World 2022 [Available from:  
48 <https://www.nytimes.com/interactive/2021/world/covid-vaccinations-tracker.html>  
49 accessed August 18, 2022.  
50  
51 40. Levac D, Colquhoun H, O'Brien KK. Scoping studies: advancing the methodology.  
52 *Implementation Science* 2010;5(1):69. doi: 10.1186/1748-5908-5-69  
53  
54 41. Arksey H, O'Malley L. Scoping studies: towards a methodological framework. *International*  
55 *Journal of Social Research Methodology* 2005;8(1):19-32. doi:  
56 10.1080/1364557032000119616  
57  
58 42. MDJ P, C M, AC T, et al. Updated methodological guidance for the conduct of scoping  
59 reviews: JBI evidence implementation 2021:3-10.  
60  
61 43. Peters MD, Godfrey C, Mclnerney P, et al. Chapter 11: Scoping reviews. In: Aromataris E MZ,  
62 ed. *JBI Manual for Evidence Synthesis*: JBI 2020.

- 1  
2  
3  
4 44. Page MJ, McKenzie JE, Bossuyt PM, et al. The PRISMA 2020 statement: an updated guideline  
5 for reporting systematic reviews. *BMJ* 2021;372:n71. doi: 10.1136/bmj.n71  
6  
7 45. Tricco AC, Lillie E, Zarin W, et al. PRISMA Extension for Scoping Reviews (PRISMA-ScR):  
8 Checklist and Explanation. *Annals of Internal Medicine* 2018;169(7):467-73. doi:  
9 10.7326/M18-0850  
10  
11 46. Al-Mustapha AI, Abubakar MI, Oyewo M, et al. Socio-Demographic Characteristics of COVID-  
12 19 Vaccine Recipients in Kwara State, North Central Nigeria. *Frontiers in Public Health*  
13 2022;9 doi: 10.3389/fpubh.2021.773998  
14  
15 47. Rikitu Terefa D, Shama AT, Feyisa BR, et al. COVID-19 Vaccine Uptake and Associated  
16 Factors Among Health Professionals in Ethiopia. *Infection and drug resistance*  
17 2021;14:5531-41. doi: 10.2147/IDR.S344647  
18  
19 48. Murewanhema G, Burukai TV, Chireka B, et al. Implementing national COVID-19 vaccination  
20 programmes in sub-Saharan Africa- early lessons from Zimbabwe: a descriptive cross-  
21 sectional study. *Pan Afr Med J* 2021;40:180. doi: 10.11604/pamj.2021.40.180.30824  
22 [published Online First: 2022/01/13]  
23  
24 49. Agha S, Chine A, Lalika M, et al. Drivers of COVID-19 Vaccine Uptake amongst Healthcare  
25 Workers (HCWs) in Nigeria. *Vaccines* 2021;9(10) doi: 10.3390/vaccines9101162  
26  
27 50. Tobin EA, Okonofua M, Adeke A, et al. Willingness to accept a COVID-19 vaccine in Nigeria:  
28 a population-based cross-sectional study. *Cent Afr J Public Health* 2021;7(2):53.  
29  
30 51. Addo PC, Kulbo NB, Sagoe KA, et al. Guarding against COVID-19 vaccine hesitance in Ghana:  
31 analytic view of personal health engagement and vaccine related attitude. *Hum Vaccin*  
32 *Immunother* 2021;17(12):5063-68. doi: 10.1080/21645515.2021.2008729 [published  
33 Online First: 2021/12/15]  
34  
35 52. Kanyanda S, Markhof Y, Wollburg P, et al. Acceptance of COVID-19 vaccines in sub-Saharan  
36 Africa: evidence from six national phone surveys. *BMJ Open* 2021;11(12):e055159. doi:  
37 10.1136/bmjopen-2021-055159 [published Online First: 2021/12/17]  
38  
39 53. Eze UA, Ndoh KI, Ibisola BA, et al. Determinants for Acceptance of COVID-19 Vaccine in  
40 Nigeria. *Cureus* 2021;13(11):e19801. doi: 10.7759/cureus.19801  
41  
42 54. Abebe H, Shitu S, Mose A. Understanding of COVID-19 vaccine knowledge, attitude,  
43 acceptance, and determinates of COVID-19 vaccine acceptance among adult population  
44 in Ethiopia. *Infection and drug resistance* 2021;14:2015.  
45  
46 55. Wiysonge CS, Alobwede SM, Katoto PDC, et al. COVID-19 vaccine acceptance and hesitancy  
47 among healthcare workers in South Africa. *Expert Review of Vaccines* 2022 doi:  
48 10.1080/14760584.2022.2023355  
49  
50 56. Kassa Mekonnen C, Gizaw Demissie N, Wako Beko Z, et al. Intent to get vaccinated against  
51 COVID-19 pandemic and its associated factors among adults with a chronic medical  
52 condition. *Int J Afr Nurs Sci* 2022;16:100401. doi: 10.1016/j.ijans.2022.100401  
53 [published Online First: 2022/03/01]  
54  
55 57. Chinawa AT, Chinawa JM, Ossai EN, et al. Maternal level of awareness and predictors of  
56 willingness to vaccinate children against COVID 19; A multi-center study. *Human*  
57 *Vaccines and Immunotherapeutics* 2021;17(11):3982-88. doi:  
58 10.1080/21645515.2021.1963172  
59  
60

- 1
- 2
- 3
- 4 58. Yilma D, Mohammed R, Getahun Abdela S, et al. COVID-19 vaccine acceptability among
- 5 health care workers in Ethiopia: Do we practice what we preach? *Trop Med Int Health*
- 6 2022 doi: 10.1111/tmi.13742 [published Online First: 2022/03/02]
- 7
- 8 59. Daley MF, Narwaney KJ, Shoup JA, et al. Addressing Parents' Vaccine Concerns: A
- 9 Randomized Trial of a Social Media Intervention. *American Journal of Preventive*
- 10 *Medicine* 2018;55(1):44-54. doi: <https://doi.org/10.1016/j.amepre.2018.04.010>
- 11
- 12 60. Ansari MTJ, Khan NA. Worldwide COVID-19 vaccines sentiment analysis through twitter
- 13 content. *Electronic Journal of General Medicine* 2021;18(6) doi: 10.29333/ejgm/11316
- 14
- 15 61. Davis TP, Jr., Yimam AK, Kalam MA, et al. Behavioural Determinants of COVID-19-Vaccine
- 16 Acceptance in Rural Areas of Six Lower- and Middle-Income Countries. *Vaccines*
- 17 2022;10(2) doi: 10.3390/vaccines10020214
- 18
- 19 62. Alle YF, Oumer KE. Attitude and associated factors of COVID-19 vaccine acceptance among
- 20 health professionals in Debre Tabor Comprehensive Specialized Hospital, North Central
- 21 Ethiopia; 2021: cross-sectional study. *Virusdisease* 2021;32(2):272-78.
- 22
- 23 63. Wonodi C, Obi-Jeff C, Adewumi F, et al. Conspiracy theories and misinformation about
- 24 COVID-19 in Nigeria: Implications for vaccine demand generation communications.
- 25 *Vaccine* 2022 doi: 10.1016/j.vaccine.2022.02.005
- 26
- 27 64. MacDonald NE. Vaccine hesitancy: Definition, scope and determinants. *Vaccine*
- 28 2015;33(34):4161-64. doi: <https://doi.org/10.1016/j.vaccine.2015.04.036>
- 29
- 30 65. Shiferie F, Sada O, Fenta T, et al. Exploring reasons for COVID-19 vaccine hesitancy among
- 31 healthcare providers in Ethiopia. *Pan Afr Med J* 2021;40:213. doi:
- 32 10.11604/pamj.2021.40.213.30699 [published Online First: 2022/02/10]
- 33
- 34 66. Anjorin AA, Odetokun IA, Abioye AI, et al. Will Africans take COVID-19 vaccination? *PLoS*
- 35 *ONE* 2021;16(12):1-15. doi: 10.1371/journal.pone.0260575
- 36
- 37 67. Orangi S, Pinchoff J, Mwangi D, et al. Assessing the Level and Determinants of COVID-19
- 38 Vaccine Confidence in Kenya. *Vaccines* 2021;9(8) doi: 10.3390/vaccines9080936
- 39
- 40 68. Katoto PDMC, Parker S, Coulson N, et al. Predictors of COVID-19 Vaccine Hesitancy in South
- 41 African Local Communities: The VaxScenes Study. *Vaccines* 2022;10(3):353.
- 42
- 43 69. Leach M, MacGregor H, Akello G, et al. Vaccine anxieties, vaccine preparedness:
- 44 Perspectives from Africa in a Covid-19 era. *Social Science & Medicine* 2022;298:114826.
- 45 doi: 10.1016/j.socscimed.2022.114826
- 46
- 47 70. WHO. Report of the SAGE Working Group on Vaccine Hesitancy, 2014.
- 48
- 49 71. Betsch C, Schmid P, Heinemeier D, et al. Beyond confidence: Development of a measure
- 50 assessing the 5C psychological antecedents of vaccination. *PLOS ONE*
- 51 2018;13(12):e0208601.
- 52
- 53 72. Geiger M, Rees F, Lilleholt L, et al. Measuring the 7Cs of Vaccination Readiness. *European*
- 54 *Journal of Psychological Assessment* 2021;38(4):261-69. doi: 10.1027/1015-
- 55 5759/a000663
- 56
- 57 73. WHO, UNICEF. Data for action: achieving high uptake of COVID-19 vaccines: gathering and
- 58 using data on the behavioural and social drivers of vaccination: a guidebook for
- 59 immunization programmes and implementing partners: interim guidance, 3 February
- 60 2021 2021 [Available from: <https://apps.who.int/iris/handle/10665/339452> accessed
- June 05, 2022.

1  
2  
3 74. Attwell K, Hannah A, Leask J. COVID-19: talk of 'vaccine hesitancy' lets governments off the  
4 hook. *Nature* 2022;602:574-77.  
5  
6  
7

8 Figure Legend/Caption:  
9

10 Figure 1: PRISMA Flow Diagram  
11

12 Figure 2: Map of Countries Included in Reviewed Studies  
13  
14  
15  
16  
17  
18  
19  
20  
21  
22  
23  
24  
25  
26  
27  
28  
29  
30  
31  
32  
33  
34  
35  
36  
37  
38  
39  
40  
41  
42  
43  
44  
45  
46  
47  
48  
49  
50  
51  
52  
53  
54  
55  
56  
57  
58  
59  
60

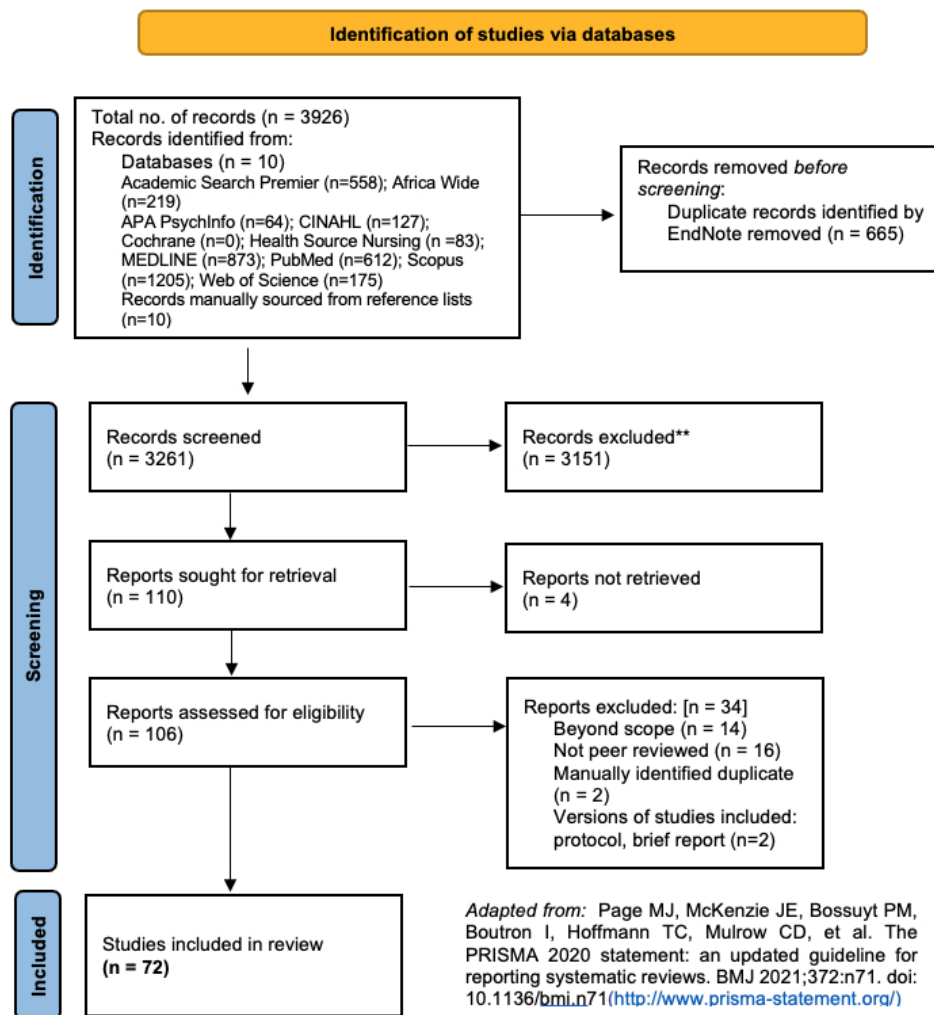

PRISMA Flow Diagram

260x273mm (72 x 72 DPI)

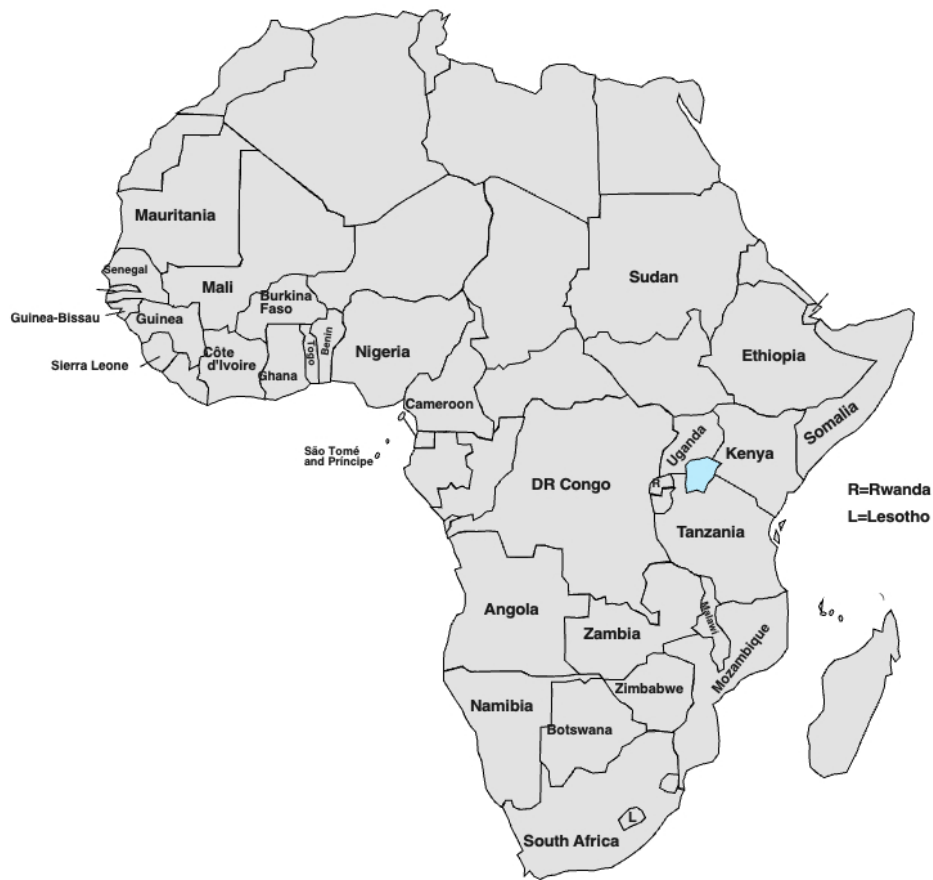

Countries Featured in Reviewed Studies

274x245mm (72 x 72 DPI)

## Supplementary file 1

The final search strategy was performed in PubMed, Scopus, Web of Science, Cochrane, Academic Search Premier, MEDLINE, Cumulative Index to Nursing and Allied Health Literature (CINAHL), Health Source Nursing, Africa Wide and APA PsychInfo on March 9, 2022, with the following search terms, where appropriate. We did not use any filters or limits in the search strategy to maximize the articles available to us.

COVID-19 Vaccines OR COVID-19 OR Coronavirus [Mesh]

"COVID-19" OR "coronavirus 2019" OR "SARS-CoV-2" OR "SARS-2" OR "severe acute respiratory syndrome coronavirus 2"

Vaccination Refusal [Mesh]

vaccination hesitancy OR vaccine hesitancy OR vaccine refusal OR vaccination refusal OR vaccine access OR access

Africa South of the Sahara [MeSH]

"Angola" OR "Benin" OR "Botswana" OR "Burkina Faso" OR "Burundi" OR "Cabo Verde" OR "Cameroon" OR "Cameroun" OR "Canary Islands" OR "Cape Verde" OR "Central Africa" OR "Central African Republic" OR "Chad" OR "Comoros" OR "Congo" OR "Cote d'Ivoire" OR "Democratic Republic of Congo" OR "Djibouti" OR "Eastern Africa" OR "Eritrea" OR "eSwatini" OR "Ethiopia" OR "Gabon" OR "Gambia" OR "Ghana" OR "Guinea" OR "Guinea-Bissau" OR "Ivory Coast" OR "Jamahiriya" OR "Kenya" OR "Lesotho" OR "Liberia" OR "Madagascar" OR "Malawi" OR "Mali" OR "Mauritania" OR "Mauritius" OR "Mayotte" OR "Mozambique" OR "Namibia" OR "Niger" OR "Nigeria" OR "Principe" OR "Reunion" OR "Rwanda" OR "Sao Tome" OR "Senegal" OR "Seychelles" OR "Sierra Leone" OR "Saint Helena" OR "Somalia" OR "St Helena" OR "South Africa" OR "Southern Africa" OR "Sudan" OR "Swaziland" OR "Tanzania" OR "Togo" OR "Uganda" OR "Western Africa" OR "Western Sahara" OR "Zaire" OR "Zambia" OR "Zimbabwe"



| Year | Author(s)                                                                                                                                                                                                                                                                                                                                          | Title                                                                                                                 | Journal                          | Abstract                                                                                                                                                                                                                                                                                                                                                                                                                                                                                                                                                                                                                                                                                                                                                                                                                                                                                                                                                                                                                                                                                                                                                                                                                                                                                                                                                                                                                                                                                                                                                                                                                                                                                                                                                                                                                                                                                                                                                                                                                                                                                                                                                                                                                                                                                                               |
|------|----------------------------------------------------------------------------------------------------------------------------------------------------------------------------------------------------------------------------------------------------------------------------------------------------------------------------------------------------|-----------------------------------------------------------------------------------------------------------------------|----------------------------------|------------------------------------------------------------------------------------------------------------------------------------------------------------------------------------------------------------------------------------------------------------------------------------------------------------------------------------------------------------------------------------------------------------------------------------------------------------------------------------------------------------------------------------------------------------------------------------------------------------------------------------------------------------------------------------------------------------------------------------------------------------------------------------------------------------------------------------------------------------------------------------------------------------------------------------------------------------------------------------------------------------------------------------------------------------------------------------------------------------------------------------------------------------------------------------------------------------------------------------------------------------------------------------------------------------------------------------------------------------------------------------------------------------------------------------------------------------------------------------------------------------------------------------------------------------------------------------------------------------------------------------------------------------------------------------------------------------------------------------------------------------------------------------------------------------------------------------------------------------------------------------------------------------------------------------------------------------------------------------------------------------------------------------------------------------------------------------------------------------------------------------------------------------------------------------------------------------------------------------------------------------------------------------------------------------------------|
| 2021 | Á F. L. de Sousa, J. R. B. Teixeira, I. Lua, F. O. Souza, A. J. F. Ferreira, G. Schneider, H. E. F. de Carvalho, L. B. de Oliveira, S. V. M. A. Lima, A. R. de Sousa, T. M. E. de Araújo, E. L. S. Camargo, M. O. B. Oriá, I. Craveiro, T. M. de Araújo, I. A. C. Mendes, C. A. A. Ventura, I. Sousa, R. M. de Oliveira, M. Simão and I. Fronteira | Determinants of COVID-19 vaccine hesitancy in portuguese-speaking countries: A structural equations modeling approach | Vaccines                         | COVID-19 vaccine hesitancy (VH) has caused concerns due to the possible fluctuations that may occur directly impacting the control of the pandemic. In this study, we aimed to estimate the prevalence and factors associated with COVID-19 VH in Portuguese-speaking countries. We developed a web survey (N:6,843) using an online, structured, and validated questionnaire. We used Measurement Models, Exploratory Factor Analysis, Exploratory Structural Equation Models, and Confirmatory Factor Analysis for the data analysis. The overall prevalence of COVID-19 VH in Portuguese-speaking countries was 21.1%. showed a statistically significant direct effect for VH: vaccine-related conspiracy beliefs (VB) ( $\beta = 0.886$ ), perceived stress (PS) ( $\beta = 0.313$ ), COVID-19 Misinformation (MIS) ( $\beta = 0.259$ ) and individual responses to COVID-19 (CIR) ( $\beta = -0.122$ ). The effect of MIS and CIR for VH was greater among men and of PS and VB among women; the effect of PS was greater among the youngest and of VB and CIR among the oldest. No discrepant differences were identified in the analyzed education strata. In conclusion, we found that conspiracy beliefs related to the vaccine strongly influence the decision to hesitate (not to take or to delay the vaccine). Specific characteristics related to gender, age group, social and cognitive vulnerabilities, added to the knowledge acquired, poorly substantiated and/or misrepresented about the COVID-19 vaccine, need to be considered in the planning of vaccination campaigns. It is necessary to respond in a timely, fast, and accurate manner to the challenges posed by vaccine hesitancy. © 2021 by the authors. Licensee MDPI, Basel, Switzerland.                                                                                                                                                                                                                                                                                                                                                                                                                                                                                                                                            |
| 2021 | A. A. Shamsirsaz, K. Hessami, S. Morain, Y. Afshar, A. A. Nassr, S. E. Arian, N. M. Asl and K. Agaard                                                                                                                                                                                                                                              | Intention to Receive COVID-19 Vaccine during Pregnancy: A Systematic Review and Meta-analysis                         | American Journal of Perinatology | Objective This meta-analysis aimed to assess the level of intent to receive coronavirus disease 2019 (COVID-19) vaccination and demographical factors influencing vaccine uptake among pregnant individuals. Study Design PubMed, Scopus, and archive/pre-print servers were searched up to May 22nd, 2021. Cross sectional surveys reporting the percentage of the pregnant individuals intending to get a COVID-19 vaccine were considered eligible for meta-analysis. This review was registered with PROSPERO (CRD42021254484). The primary outcome was to estimate the prevalence of COVID-19 vaccination intent among pregnant population. The secondary outcome was to evaluate the factors influencing the intention for vaccination. Results Twelve studies sourcing data of 16,926 individuals who were identified as pregnant were eligible. The estimated intention for the receipt of COVID-19 vaccine among women who were pregnant was 47% (95% CI: 38-57%), with the lowest prevalence in Africa 19% (95% CI: 17-21%) and the highest in Oceania 48.0% (95% CI: 44.0-51.0%). Uptake of other vaccines (influenza and/or Tdap) during pregnancy was associated with higher rate of intent to receive the COVID-19 vaccine (OR = 3.03; 95% CI: 1.37-6.73; p = 0.006). Conclusion The intent to receive COVID-19 vaccine is relatively low among women who are pregnant and substantially varies based on the country of residence. In our meta-analysis, intent of women who were pregnant to receive the COVID-19 vaccine was significantly associated with the history of receiving influenza or Tdap vaccine during pregnancy. Given that in every country only a minority of gravidae have received the COVID-19 vaccine, despite known risks of maternal morbidity and mortality with no evidence of risks of vaccination, it highlights the importance of revised approaches at shared decision making and focused public health messaging by national and international advisories. Key Points The estimated global intention for COVID-19 vaccination among pregnant women was 47%. The lowest intention was in Africa and the highest in Oceania. These findings highlight the importance of public health messaging by by different agencies. © 2021 Georg Thieme Verlag. All rights reserved. |



| Year | Author(s)                                                                                                                                            | Title                                                                                                  | Journal                    | Abstract                                                                                                                                                                                                                                                                                                                                                                                                                                                                                                                                                                                                                                                                                                                                                                                                                                                                                                                                                                                                                                                                                                                                                                                                                                                                                                                                                                                                                                                                                                                                                                                                                                                                                                                                                                                                                                                                                                                                                                                                                                                                                                                   |
|------|------------------------------------------------------------------------------------------------------------------------------------------------------|--------------------------------------------------------------------------------------------------------|----------------------------|----------------------------------------------------------------------------------------------------------------------------------------------------------------------------------------------------------------------------------------------------------------------------------------------------------------------------------------------------------------------------------------------------------------------------------------------------------------------------------------------------------------------------------------------------------------------------------------------------------------------------------------------------------------------------------------------------------------------------------------------------------------------------------------------------------------------------------------------------------------------------------------------------------------------------------------------------------------------------------------------------------------------------------------------------------------------------------------------------------------------------------------------------------------------------------------------------------------------------------------------------------------------------------------------------------------------------------------------------------------------------------------------------------------------------------------------------------------------------------------------------------------------------------------------------------------------------------------------------------------------------------------------------------------------------------------------------------------------------------------------------------------------------------------------------------------------------------------------------------------------------------------------------------------------------------------------------------------------------------------------------------------------------------------------------------------------------------------------------------------------------|
| 2021 | A. D. Wake                                                                                                                                           | The Acceptance Rate Toward COVID-19 Vaccine in Africa: A Systematic Review and Meta-analysis           | Global Pediatric Health    | Background: The Coronavirus Disease 2019 (COVID-19) pandemic remains serious public issue. COVID-19 vaccine is a vital strategy to prevent this critical pandemic. However, unwillingness to take this vaccine are key barriers to manage the COVID-19 pandemic. The control of this pandemic will depend principally on the people acceptance of COVID-19 vaccine. Therefore, this systematic review and meta-analysis was intended to determine the acceptance rate toward COVID-19 vaccine in Africa. Methods: African Journals OnLine, PubMed, Cochrane Review, HINARI, EMBASE, Google Scholar, Web of Science, and Scopus were used to retrieve related articles. The Preferred Reporting Items for Systematic Review and Meta-Analysis (PRISMA) guidelines were used for this study. Random-effect model, a funnel plot, Egger's test, I-2 statistic, subgroup analysis was done. The study was performed by using a STATA version 11 statistical software. Results: A total of 22 studies with 33,912 study participants were included in this systematic review and meta-analysis. From this finding, the pooled prevalence of acceptance toward COVID-19 vaccine among adults in Africa was 48.93% (95% CI: [39.49, 58.37]). The subgroup analysis revealed that the pooled prevalence of COVID-19 vaccine acceptance among adults in Africa was highest (66.03%, 95% CI [62.84, 69.22]) in Southern Africa, and Lowest (24.28%, 95% CI [3.26, 45.30]) in Northern Africa. Conclusion: This study showed that the estimate of the pooled prevalence of acceptance toward COVID-19 vaccine among adults in Africa was very low. All concerned bodies should be actively involved to improve the acceptance rate of COVID-19 vaccine.                                                                                                                                                                                                                                                                                                                                                                               |
| 2022 | A. I. Al-Mustapha, M. I. Abubakar, M. Oyewo, R. E. Esighetti, O. A. Ogundijo, L. D. Bolanle, O. E. Fakayode, A. S. Olugbon, M. Oguntoye and N. Elelu | Socio-Demographic Characteristics of COVID-19 Vaccine Recipients in Kwara State, North Central Nigeria | Frontiers in Public Health | Understanding key socio-demographic variables of 2019 coronavirus disease (COVID-19) vaccine recipients is crucial to improving its acceptance and Nigeria's COVID-19 control strategy. The survey was conducted as a non-probability cross-sectional survey of 2,936 COVID-19 vaccine recipients in Kwara State. Our findings revealed that 74% (n = 2,161) of the vaccine recipients were older than 40 years. Forty percent (n = 1,180) of the vaccine recipients earned a monthly income >100,000 Naira (equivalent to US \$200). Most of the vaccine recipients (64%, n = 1,880) had tertiary education, while 15% (n = 440) of them had no formal education. Almost half of the recipients (47%, n = 1,262) were government employees and 28.8% (n = 846) of them had health-related backgrounds. Only 17% (n = 499) of the vaccine recipients have been screened for the severe acute respiratory syndrome coronavirus 2 (SARS-CoV-2), of which 21% (n = 105/499) of them were tested positive. Only 47% (n = 1,378) had been fully immunized. The prevalence of confirmed COVID-19 cases among COVID-19 vaccine recipients in Kwara State was 3.6% (n = 105/2,936). The most recurrent adverse events following immunization (AEFIs) among vaccine recipients were fever (14%, n = 411), pain at injection site (47%, n = 1,409), headache (19%, n = 558), and body weakness (9%, n = 264). The need to protect themselves from the deadly virus was the main reason that prompted people to voluntarily accept the COVID-19 vaccine. There is a high level of COVID-19 vaccine acceptance among respondents across all social classes including those with no formal education, those with very low monthly income (< US \$2 per day), and in untested population. Hence, vaccine donors should prioritize equitable distribution to Low-and-Middle-income Countries (LMICs) such as Nigeria, and health authorities should improve vaccine advocacy to focus on vaccine safety and efficacy. Copyright © 2022 Al-Mustapha, Abubakar, Oyewo, Esighetti, Ogundijo, Bolanle, Fakayode, Olugbon, Oguntoye and Elelu. |

| Year | Author(s)                                                                                        | Title                                                                                                                                                                        | Journal                                   | Abstract                                                                                                                                                                                                                                                                                                                                                                                                                                                                                                                                                                                                                                                                                                                                                                                                                                                                                                                                                                                                                                                                                                                                                                                                                                                                                                                                                                                                                                                                                                                                                                                                                                                                                                                                                                                                                                                                                                                                                                                                                                                                                                                                                                                 |
|------|--------------------------------------------------------------------------------------------------|------------------------------------------------------------------------------------------------------------------------------------------------------------------------------|-------------------------------------------|------------------------------------------------------------------------------------------------------------------------------------------------------------------------------------------------------------------------------------------------------------------------------------------------------------------------------------------------------------------------------------------------------------------------------------------------------------------------------------------------------------------------------------------------------------------------------------------------------------------------------------------------------------------------------------------------------------------------------------------------------------------------------------------------------------------------------------------------------------------------------------------------------------------------------------------------------------------------------------------------------------------------------------------------------------------------------------------------------------------------------------------------------------------------------------------------------------------------------------------------------------------------------------------------------------------------------------------------------------------------------------------------------------------------------------------------------------------------------------------------------------------------------------------------------------------------------------------------------------------------------------------------------------------------------------------------------------------------------------------------------------------------------------------------------------------------------------------------------------------------------------------------------------------------------------------------------------------------------------------------------------------------------------------------------------------------------------------------------------------------------------------------------------------------------------------|
| 2021 | A. Mose and A. Yeshaneh                                                                          | COVID-19 vaccine acceptance and its associated factors among pregnant women attending antenatal care clinic in southwest ethiopia: Institutional-based cross-sectional study | International Journal of General Medicine | Background: COVID-19 vaccination is a safe and effective approach to control the pandemic and to prevent its associated morbidity and mortality. To our knowledge, there is no study conducted to assess the prevalence of COVID-19 vaccine acceptance among pregnant women in Ethiopia. Therefore, the main objective of this study was to assess the prevalence of COVID-19 vaccine acceptance and its associated factors among pregnant women attending antenatal care clinic in Southwest Ethiopia. Methods: An institution-based cross-sectional study was employed from January 1 up to 30, 2021. A systematic random sampling technique was used to select 396 study participants. A structured and face-to-face interview was used to collect data. Data were entered into Epi-data version 4.2.0 and exported to SPSS version 23 for analysis. Bivariate and multivariate analyses were used to identify factors associated with COVID-19 vaccine acceptance. P values <0.05 result were considered as a statistically significant association. Results: The COVID-19 vaccine acceptance was found to be 70.7% (95% CI, 66.7%– 74.7%). Maternal age (34–41) years [AOR=1.464, (95% CI; 1.218–5.129)], primary maternal educational status [AOR=3.476, (95% CI; 1.520–7.947)], good knowledge [AOR=5.946, (95% CI; 3.147–7.065)], and good practice [AOR =9.15, (95% CI; 8.734–12.189)] of pregnant women towards COVID-19 and its preventive measures were factors associated with COVID-19 vaccine acceptance. Conclusion: COVID-19 vaccine acceptance was found to be 70.9%. Maternal age (34–41) years, primary maternal educational status, good knowledge, and good practice of pregnant women towards COVID-19 and its preventive measures were factors associated with COVID-19 vaccine acceptance. Health care workers should provide health education to pregnant women to increase their knowledge about the diseases and disseminate leaflets regarding COVID-19 preventive measures. Moreover, before initiation of COVID-19 vaccine administration to pregnant women they must promote the safety and effectiveness of COVID-19 vaccine. © 2021 Mose and Yeshaneh. |
| 2021 | A. T. Chinawa, J. M. Chinawa, E. N. Ossai, N. Obinna, V. Onukwuli, A. E. Aronu and C. P. Manyike | Maternal level of awareness and predictors of willingness to vaccinate children against COVID 19; A multi-center study                                                       | Human Vaccines and Immunotherapeutics     | Background: Several controversies surround mothers' willingness to vaccinate against the COVID-19 pandemic especially when mortality is not frequently reported in children. Objectives: This study aimed to ascertain the willingness of mothers of children attending two institutions in Southeast Nigeria to accept the COVID-19 vaccine and factors that may be associated with their choices. Methodology: This was a cross-sectional study carried out among 577 mothers who presented with their children in two tertiary health institutions in southeast Nigeria. Results: Majority of the respondents (93.9%) were aware of the COVID-19 vaccine. Majority of the respondents, 89.4%, noted that children were not in high priority groups for COVID-19 vaccination in Nigeria. Only 6.9% of the respondents intend to receive the COVID-19 vaccination. Also, a minor proportion of the respondents (4.9%) were willing to vaccinate their children with the COVID-19 vaccine. The odds of receiving the Covid-19 vaccine were four times greater in those who believed that they could be infected than in those who believed that they could not be infected (AOR = 4.0. 95% CI:1.8–8.7). The odds of receiving the Covid-19 vaccine were six times greater in those who were aware of someone that died from COVID-19 than in those who did not know anyone who died from COVID-19 (AOR = 5.7, 95% CI: 2.1–15.8). Conclusion: A high level of awareness but low acceptance level for COVID-19 vaccination for mothers and their children was noted. Socioeconomic class, maternal age, and level of education did not influence the willingness of the mother to receive COVID vaccination. Having a belief of possibility of infection with the COVID-19 as well as being aware of someone who died from the disease were important positive variables that could predict vaccine acceptance from this study. © 2021 Taylor & Francis Group, LLC.                                                                                                                                                                                                                        |

| Year | Author(s)                                                                                                                                                                                                                                                                                                                                                                           | Title                                                                                                                  | Journal  | Abstract                                                                                                                                                                                                                                                                                                                                                                                                                                                                                                                                                                                                                                                                                                                                                                                                                                                                                                                                                                                                                                                                                                                                                                                                                                                                                                                                                                                                                                                                                                                                                                                                                                                                                                                                                                                                                                                                                                                                                                                                                                                                                                                                                             |
|------|-------------------------------------------------------------------------------------------------------------------------------------------------------------------------------------------------------------------------------------------------------------------------------------------------------------------------------------------------------------------------------------|------------------------------------------------------------------------------------------------------------------------|----------|----------------------------------------------------------------------------------------------------------------------------------------------------------------------------------------------------------------------------------------------------------------------------------------------------------------------------------------------------------------------------------------------------------------------------------------------------------------------------------------------------------------------------------------------------------------------------------------------------------------------------------------------------------------------------------------------------------------------------------------------------------------------------------------------------------------------------------------------------------------------------------------------------------------------------------------------------------------------------------------------------------------------------------------------------------------------------------------------------------------------------------------------------------------------------------------------------------------------------------------------------------------------------------------------------------------------------------------------------------------------------------------------------------------------------------------------------------------------------------------------------------------------------------------------------------------------------------------------------------------------------------------------------------------------------------------------------------------------------------------------------------------------------------------------------------------------------------------------------------------------------------------------------------------------------------------------------------------------------------------------------------------------------------------------------------------------------------------------------------------------------------------------------------------------|
| 2021 | Abayomi Samuel Oyekale                                                                                                                                                                                                                                                                                                                                                              | Compliance Indicators of COVID-19 Prevention and Vaccines Hesitancy in Kenya: A Random-Effects Endogenous Probit Model | Vaccines | Vaccine hesitancy remains a major public health concern in the effort towards addressing the COVID-19 pandemic. This study analyzed the effects of indicators of compliance with preventive practices on the willingness to take COVID-19 vaccines in Kenya. The data were from the COVID-19 Rapid Response Phone Surveys conducted between January and June 2021 during the fourth and fifth waves. The data were analyzed with the random-effects endogenous Probit regression model, with estimated parameters tested for robustness and stability. The results showed that willingness to take vaccines increased between the fourth and fifth waves. Compliance with many of the preventive practices also improved, although the utilizations of immune system-promoting practices were very low. The panel Probit regression results showed that compliance indicators were truly endogenous and there was existence of random effects. Immune system-boosting and contact-prevention indicators significantly increased and decreased the willingness to take vaccines, respectively ( $p < 0.01$ ). The experience of mental health disorders in the form of nervousness and hopelessness also significantly influenced vaccine hesitancy ( $p < 0.10$ ). Willingness to take vaccines also significantly increased among older people and those with a formal education ( $p < 0.01$ ). Different forms of association exist between vaccine hesitancy and the prevention compliance indicators. There is a need to properly sensitize the people to the need to complement compliance with COVID-19 contact-prevention indicators with vaccination. Addressing mental health disorders in the form of loneliness, nervousness, depression, hopelessness and anxiety should also become the focus of public health, while efforts to reduce vaccine hesitancy should focus on individuals without formal education, males and youths.                                                                                                                                                                                                                      |
| 2021 | AbdulAzeez A. Anjorin, Ismail A. Odetokun, Ajibola I. Abioye, Hager Elnadi, Mfon Valencia Umoren, Bamu F. Damaris, Joseph Eyedo, Haruna I. Umar, Jean B. Nyandwi, Mena M. Abdalla, Sodiq O. Tijani, Kwame S. Awiagah, Gbolahan A. Idowu, Sifeuh N. Achille Fabrice, Aala M. O. Maisara, Youssef Razouqi, Zuhail E. Mhgoob, Salim Parker, Osaretin E. Asowata and Ismail O. Adesanya | Will Africans take COVID-19 vaccination?                                                                               | PLoS ONE | The economic and humanistic impact of COVID-19 pandemic is enormous globally. No definitive treatment exists, hence accelerated development and approval of COVID-19 vaccines, offers a unique opportunity for COVID-19 prevention and control. Vaccine hesitancy may limit the success of vaccine distribution in Africa, therefore we assessed the potentials for coronavirus vaccine hesitancy and its determinants among Africans. An online cross-sectional African-wide survey was administered in Arabic, English, and French languages. Questions on demographics, self-reported health status, vaccine literacy, knowledge and perception on vaccines, past experience, behavior, infection risk, willingness to receive and affordability of the SARS-COV-2 vaccine were asked. Data were subjected to descriptive and inferential statistics. A total of 5,416 individuals completed the survey. Approximately, 94% were residents of 34 African countries while the other Africans live in the Diaspora. Only 63% of all participants surveyed were willing to receive the COVID-19 vaccination as soon as possible and 79% were worried about its side effects. Thirty-nine percent expressed concerns of vaccine-associated infection. The odds of vaccine hesitancy was 0.28 (95% CI: 0.22, 0.30) among those who believed their risk of infection was very high, compared to those who believed otherwise. The odds of vaccine hesitancy was one-fifth (OR = 0.21, 95% CI: 0.16, 0.28) among those who believed their risk of falling sick was very high, compared to those who believed their risk of falling very sick was very low. The OR of vaccine hesitancy was 2.72 (95% CI: 2.24, 3.31) among those who have previously refused a vaccine for themselves or their child compared to counterparts with no self-reported history of vaccine hesitancy. Participants want the vaccines to be mandatory (40%), provided free of charge (78%) and distributed in homes and offices (44%). COVID-19 vaccine hesitancy is substantial among Africans based on perceived risk of coronavirus infection and past experiences. [ABSTRACT FROM AUTHOR] |

| Year | Author(s)                                                                                                                                                                     | Title                                                                                                                                                 | Journal                             | Abstract                                                                                                                                                                                                                                                                                                                                                                                                                                                                                                                                                                                                                                                                                                                                                                                                                                                                                                                                                                                                                                                                                                                                                                                                                                                                                                                                                                                                                                                                                                                                                                                                                                                                                                                                                                                                                                                                                                                                                                                                                                                                                                                                                                                                                                                                                                                                                   |
|------|-------------------------------------------------------------------------------------------------------------------------------------------------------------------------------|-------------------------------------------------------------------------------------------------------------------------------------------------------|-------------------------------------|------------------------------------------------------------------------------------------------------------------------------------------------------------------------------------------------------------------------------------------------------------------------------------------------------------------------------------------------------------------------------------------------------------------------------------------------------------------------------------------------------------------------------------------------------------------------------------------------------------------------------------------------------------------------------------------------------------------------------------------------------------------------------------------------------------------------------------------------------------------------------------------------------------------------------------------------------------------------------------------------------------------------------------------------------------------------------------------------------------------------------------------------------------------------------------------------------------------------------------------------------------------------------------------------------------------------------------------------------------------------------------------------------------------------------------------------------------------------------------------------------------------------------------------------------------------------------------------------------------------------------------------------------------------------------------------------------------------------------------------------------------------------------------------------------------------------------------------------------------------------------------------------------------------------------------------------------------------------------------------------------------------------------------------------------------------------------------------------------------------------------------------------------------------------------------------------------------------------------------------------------------------------------------------------------------------------------------------------------------|
| 2021 | Abiy Tadesse Angelo, Daniel Shiferaw Alemayehu and Aklilu Mamo Dachew                                                                                                         | Health care workers intention to accept COVID-19 vaccine and associated factors in southwestern Ethiopia, 2021                                        | PLOS ONE                            | Introduction Health care workers are the most affected part of the world population due to the COVID-19 pandemic. Countries prioritize vaccinating health workers against COVID-19 because of their susceptibility to the virus. However, the acceptability of the vaccine varies across populations. Thus, this study aimed to determine the health care worker's intentions to accept the COVID-19 vaccine and its associated factors in southwestern Ethiopia, 2021. Methods A facility-based cross-sectional study was conducted among health care workers in public hospitals in southwestern Ethiopia from March 15 to 28, 2021. A simple random sampling method was used to select 405 participants from each hospital. Data were collected using self-administered questionnaires. Descriptive statistics, such as frequency and percentage, were calculated. Multivariable logistic regression was also performed to identify factors associated with health care worker's intention to accept the COVID-19 vaccine. Statistically significant variables were selected based on p-values (<0.05) and the adjusted odds ratio was used to describe the strength of association with 95% confidence intervals. Result Among the respondents, 48.4% [95% CI: 38.6, 58.2] of health care workers intended to accept COVID-19. Intention to accept COVID-19 vaccination was significantly associated with physicians (AOR = 9.27, 95% CI: 1.27–27.32), professionals with a history of chronic illness (AOR = 4.07, 95% CI: 2.02–8.21), perceived degree of risk of COVID-19 infection (AOR = 4.63, 95% CI: 1.26–16.98), positive attitude toward COVID-19 prevention (AOR = 6.08, 95% CI: 3.39–10.91) and good preventive practices (AOR = 2.83, 95% CI: 1.58–5.08). Conclusion In this study, the intention of health care workers to accept the COVID-19 vaccine was low. Professional types, history of chronic illness, perceived degree of risk to COVID-19 infection, attitude toward COVID-19 and preventive practices were found to be factors for intention to accept COVID-19 vaccine in professionals. It is important to consider professional types, history of chronic illness, perceived degree of risk to COVID-19, attitude of professionals and preventive behaviors to improve the intention of professionals' vaccine acceptance. |
| 2021 | Agazhe Aemro, Nakachew Sewnet Amare, Belayneh Shetie, Basazinew Chekol and Mulugeta Wassie                                                                                    | Determinants of COVID-19 vaccine hesitancy among health care workers in Amhara region referral hospitals, Northwest Ethiopia: a cross-sectional study | Epidemiology & Infection            |                                                                                                                                                                                                                                                                                                                                                                                                                                                                                                                                                                                                                                                                                                                                                                                                                                                                                                                                                                                                                                                                                                                                                                                                                                                                                                                                                                                                                                                                                                                                                                                                                                                                                                                                                                                                                                                                                                                                                                                                                                                                                                                                                                                                                                                                                                                                                            |
| 2021 | Andrea C Carcelen, Christine Prosperi, Simon Mutembo, Gershom Chongwe, Francis D Mwansa, Phillimon Ndubani, Edgar Simulundu, Innocent Chilumba, Gloria Musukwa and Phil Thuma | COVID-19 vaccine hesitancy in Zambia: A glimpse at the possible challenges ahead for COVID-19 vaccination rollout in sub-Saharan Africa               | Human Vaccines & Immunotherapeutics |                                                                                                                                                                                                                                                                                                                                                                                                                                                                                                                                                                                                                                                                                                                                                                                                                                                                                                                                                                                                                                                                                                                                                                                                                                                                                                                                                                                                                                                                                                                                                                                                                                                                                                                                                                                                                                                                                                                                                                                                                                                                                                                                                                                                                                                                                                                                                            |

1  
2  
3  
4  
5  
6  
7  
8  
9  
10  
11  
12  
13  
14  
15  
16  
17  
18  
19  
20  
21  
22  
23  
24  
25  
26  
27  
28  
29  
30  
31  
32  
33  
34  
35  
36  
37  
38  
39  
40  
41  
42  
43  
44  
45  
46

| Year | Author(s)                                                                                                                                                                                                                                                                         | Title                                                                                                         | Journal                    | Abstract                                                                                                                                                                                                                                                                                                                                                                                                                                                                                                                                                                                                                                                                                                                                                                                                                                                                                                                                                                                                                                                                                                                                                                                                                                                                                                                                                                                                                                                                                                                                                                                                                                                                                                                                                                                                                                                                                                                                                                                                                                                                                                                                                                                                     |
|------|-----------------------------------------------------------------------------------------------------------------------------------------------------------------------------------------------------------------------------------------------------------------------------------|---------------------------------------------------------------------------------------------------------------|----------------------------|--------------------------------------------------------------------------------------------------------------------------------------------------------------------------------------------------------------------------------------------------------------------------------------------------------------------------------------------------------------------------------------------------------------------------------------------------------------------------------------------------------------------------------------------------------------------------------------------------------------------------------------------------------------------------------------------------------------------------------------------------------------------------------------------------------------------------------------------------------------------------------------------------------------------------------------------------------------------------------------------------------------------------------------------------------------------------------------------------------------------------------------------------------------------------------------------------------------------------------------------------------------------------------------------------------------------------------------------------------------------------------------------------------------------------------------------------------------------------------------------------------------------------------------------------------------------------------------------------------------------------------------------------------------------------------------------------------------------------------------------------------------------------------------------------------------------------------------------------------------------------------------------------------------------------------------------------------------------------------------------------------------------------------------------------------------------------------------------------------------------------------------------------------------------------------------------------------------|
| 2021 | Andrew Marvin Kanyike, Ronald Olum, Jonathan Kajjimu, Daniel Ojilong, Gabriel Madut Akech, Dianah Rhoda Nassozi, Drake Agira, Nicholas Kisaakye Wamala, Asaph Asiiimwe, Dissan Matovu, Ann Babra Nakimuli, Musilim Lyavala, Patricia Kulwenza, Joshua Kiwumulo and Felix Bongomin | Acceptance of the coronavirus disease-2019 vaccine among medical students in Uganda                           | Tropical Medicine & Health | Background: COVID-19 is still a major global threat for which vaccination remains the ultimate solution. Uganda reported 40,751 cases and 335 deaths as of 9 April 2021 and started its vaccination program among priority groups like health workers, teachers, those with chronic diseases among others in early March 2021. Unanimous uptake of the COVID-19 vaccine is required to subsequently avert its spread; therefore, we assessed COVID-19 vaccine acceptability, hesitancy, and associated factors among medical students in Uganda. Methods: This study employed an online descriptive cross-sectional survey among medical students across 10 medical schools in Uganda. A structured questionnaire via Google Form was conveniently sent to eligible participants via WhatsApp. Each medical school had a coordinator who consistently shared the data tool in the WhatsApp groups. Chi-square or Fisher's exact test, and logistic regression were used to assess the association between vaccine acceptability with demographics, COVID-19 risk perception, and vaccine hesitancy. Results: We surveyed 600 medical students, 377 (62.8%) were male. COVID-19 vaccine acceptability was 37.3% and vaccine hesitancy 30.7%. Factors associated with vaccine acceptability were being male (adjusted odds ratio (aOR) = 1.9, 95% CI 1.3-2.9, p=0.001) and being single (aOR= 2.1, 95% CI 1.1-3.9, p=0.022). Very high (aOR= 3.5, 95% CI 1.7-6.9, p<0.001) or moderate (aOR=2.2, 95% CI 1.2-4.1, p=0.008) perceived risk of getting COVID-19 in the future, receiving any vaccine in the past 5 years (aOR= 1.6, 95% CI 1.1-2.5, p=0.017), and COVID-19 vaccine hesitancy (aOR 0.6, 95% CI 0.4-0.9, p=0.036). Conclusions: This study revealed low levels of acceptance towards the COVID-19 vaccine among medical students, low self-perceived risks of COVID-19, and many had relied on social media that provided them with negative information. This poses an evident risk on the battle towards COVID-19 in the future especially when these future health professions are expected to be influencing decisions of the general public towards the same. [ABSTRACT FROM AUTHOR]           |
| 2022 | Ayenew Mose, Kassahun Haile and Abebe Timerga                                                                                                                                                                                                                                     | COVID-19 vaccine hesitancy among medical and health science students attending Wolkite University in Ethiopia | PLOS ONE                   | Background: Medical and health science students are among the frontline health care workers who are at high risk of acquiring COVID-19 infection during their clinical attachments and future career. As health care providers, they are expected to promote and administer the COVID-19 vaccine and counsel vaccine-hesitant patients. It is, therefore, imperative to assess COVID-19 vaccine hesitancy among medical and health science students. Thus, this study aimed to assess COVID-19 vaccine hesitancy and its associated factors among medical and health science students of Wolkite University. Method: An institutional-based cross-sectional study design was conducted among 420 medical and health science students attending Wolkite University from March 1 to 30, 2021. Simple random sampling technique was used to select study participants. Self-administered and structured questionnaires were used to collect data. Data were entered into Epi-Data version 4.2.0 and exported to SPSS version 23 software package for further analysis. Bivariable and multivariable analysis was used to identify associated factors. P values <0.05 result were considered as a statistically significant association. Results: The level of COVID-19 vaccine hesitancy was 41.2% (95% CI; 35.2%-50.4%). Student age ≤23 years were 1.9 times more likely vaccine hesitant [aOR = 1.94, 95% CI; 1.14–3.28], being female were 1.7 times more likely vaccine hesitant [aOR = 1.76, 95% CI; 1.14–2.72], resided in rural area were 1.6 times more likely vaccine hesitant [aOR = 1.63, 95% CI; 1.06–2.49], source of information from social media were 2.7 times more likely vaccine hesitant [aOR = 2.68, 95% CI; 1.58–4.54], and good practice to COVID-19 mitigation measures were 47% less likely vaccine hesitant [aOR = 0.53, 95% CI; 0.34–0.83] compared to their counterpart. Conclusions: COVID-19 vaccine hesitancy is found to be high. Therefore, students are advised to receive COVID-19 vaccine information from government lead mass media (i.e. television and radio), increase awareness and adherence to COVID-19 mitigation measures is recommended. [ABSTRACT FROM AUTHOR] |

| Year | Author(s)                                                                                                       | Title                                                                                                                                       | Journal                              | Abstract                                                                                                                                                                                                                                                                                                                                                                                                                                                                                                                                                                                                                                                                                                                                                                                                                                                                                                                                                                                                                                                                                                                                                                                                                                                                                                                                                                                                                                                                                                                                                                                                                                                                                                                                                                                                                                                                                                                                                                                                                                                                                                                                                                                                                                                                                                                    |
|------|-----------------------------------------------------------------------------------------------------------------|---------------------------------------------------------------------------------------------------------------------------------------------|--------------------------------------|-----------------------------------------------------------------------------------------------------------------------------------------------------------------------------------------------------------------------------------------------------------------------------------------------------------------------------------------------------------------------------------------------------------------------------------------------------------------------------------------------------------------------------------------------------------------------------------------------------------------------------------------------------------------------------------------------------------------------------------------------------------------------------------------------------------------------------------------------------------------------------------------------------------------------------------------------------------------------------------------------------------------------------------------------------------------------------------------------------------------------------------------------------------------------------------------------------------------------------------------------------------------------------------------------------------------------------------------------------------------------------------------------------------------------------------------------------------------------------------------------------------------------------------------------------------------------------------------------------------------------------------------------------------------------------------------------------------------------------------------------------------------------------------------------------------------------------------------------------------------------------------------------------------------------------------------------------------------------------------------------------------------------------------------------------------------------------------------------------------------------------------------------------------------------------------------------------------------------------------------------------------------------------------------------------------------------------|
| 2021 | B. O. Botwe, W. K. Antwi, J. A. Adusei, R. N. Mayeden, T. N. Akudjedu and S. D. Sule                            | COVID-19 vaccine hesitancy concerns: Findings from a Ghana clinical radiography workforce survey                                            | Radiography (London, England : 1995) | <p>Introduction: Vaccination is a key global strategy to mitigate the clinical impact of the COVID-19 virus. As part of local efforts to manage the outbreak, the government of Ghana announced its intention to vaccinate its population starting with essential and high-risk workers including radiographers. However, there were reports of hesitance to receiving the vaccine among the radiography workforce. This study was undertaken prior to the intended vaccination exercise to assess the willingness and concerns of radiographers to undergo the COVID-19 vaccination and to suggest recommendations to improve the vaccine uptake.; Methods: An ethically-approved online survey strategy was employed for this cross-sectional study conducted between 24th-28th February 2021. The survey employed quantitative questions and open text response options. Quantitative and open text responses were analysed using statistical and thematic analyses, respectively.; Results: There were 108 responses (response rate of 46.3%). The majority (n = 64, 59.3%) were willing to have the vaccine, however, some (n = 44, 40.7%) were not. The main reason behind their willingness to have the vaccine was its ability to reduce the spread of infections and lower mortality (n = 35, 54.7%). However, doubts about the vaccine's efficacy and side effects (n = 26, 56.8%), conspiracy theory concerns about its effects on the Ghanaian race (n = 4, 9.1%), and fertility concerns (n = 2, 4.5%) were some reasons for their hesitance to receive the vaccine. The open text commentary further revealed that the vaccine was thought of as a lifesaving medication, however, clinical safety concerns, lack of education/information and religious beliefs were affecting peoples' willingness to be vaccinated.; Conclusion: Our findings demonstrate the need for an urgent public health educational intervention to address the COVID-19 vaccine hesitancy concerns raised by radiographers to help increase the vaccine uptake.; Implication for Practice: The study provides pertinent information to improve COVID-19 vaccine uptake among radiographers to limit the spread of infections. (Copyright © 2021 The College of Radiographers. Published by Elsevier Ltd. All rights reserved.)</p> |
| 2021 | B. T. Taye, F. K. Amogne, T. L. Demisse, M. S. Zerihun, T. M. Kitaw, A. E. Tiguh, M. S. Mihret and A. A. Kebede | Coronavirus disease 2019 vaccine acceptance and perceived barriers among university students in northeast Ethiopia: A cross-sectional study | Clin Epidemiol Glob Health           | <p>BACKGROUND: Universities are places where students live and study in close contact to each other. Nowadays, the foundations of this particular group have been affected significantly by the rapid spread of the coronavirus disease 2019. The severity of the COVID-19 pandemic has demanded the emergency use of COVID-19 vaccines. However, there is still limited evidence in COVID-19 vaccine acceptability and perceived barriers among some subgroups, including university students. This study aimed to assess vaccine acceptance, associated factors, and perceived barriers among university students, Ethiopia. METHODS: A cross-sectional study was conducted in January 2021 at Debre Berhan University among 423 students. The participants were selected using simple random sampling technique. A semi-structured, pretested, and self-administered questionnaire was used to collect the data. Multivariable logistic-regression model was fitted to identify factors associated with vaccine acceptance. An adjusted odds ratio with 95% confidence interval and its p-value of <math>\leq 0.05</math> was used to declare significant association. RESULTS: The proportion of the COVID-19 vaccine acceptance was 69.3% (95% CI: 65, 74). Being knowledgeable (AOR: 2.43, CI: 1.57, 3.77), being a health science student (AOR: 2.25, CI: 1.43, 3.54), and being in a family practicing COVID-19 prevention (AOR: 1.73, CI: 1.06, 2.81) were found to be factors associated with COVID-19 vaccine acceptance. CONCLUSION: Though, this study found a 69.3% acceptance of COVID-19 vaccine, there were noticeable perceived barriers and related factors in vaccine acceptance hesitancy. Thus, health education and communication regarding the vaccine are very crucial to alleviate the identified barriers.</p>                                                                                                                                                                                                                                                                                                                                                                                                                                                                                   |

1  
2  
3  
4  
5  
6  
7  
8  
9  
10  
11  
12  
13  
14  
15  
16  
17  
18  
19  
20  
21  
22  
23  
24  
25  
26  
27  
28  
29  
30  
31  
32  
33  
34  
35  
36  
37  
38  
39  
40  
41  
42  
43  
44  
45  
46

| Year | Author(s)                                 | Title                                                                                           | Journal                              | Abstract                                                                                                                                                                                                                                                                                                                                                                                                                                                                                                                                                                                                                                                                                                                                                                                                                                                                                                                                                                                                                                                                                                                                                                                                                                                                                                                                                                                                                                                                                                                                                                                                                                                                                                                                                                                                                                                                                                                                                                                                                                                                                                                                                                                                                                                                                                                                                                                                                                                                                                                                                                                                                               |
|------|-------------------------------------------|-------------------------------------------------------------------------------------------------|--------------------------------------|----------------------------------------------------------------------------------------------------------------------------------------------------------------------------------------------------------------------------------------------------------------------------------------------------------------------------------------------------------------------------------------------------------------------------------------------------------------------------------------------------------------------------------------------------------------------------------------------------------------------------------------------------------------------------------------------------------------------------------------------------------------------------------------------------------------------------------------------------------------------------------------------------------------------------------------------------------------------------------------------------------------------------------------------------------------------------------------------------------------------------------------------------------------------------------------------------------------------------------------------------------------------------------------------------------------------------------------------------------------------------------------------------------------------------------------------------------------------------------------------------------------------------------------------------------------------------------------------------------------------------------------------------------------------------------------------------------------------------------------------------------------------------------------------------------------------------------------------------------------------------------------------------------------------------------------------------------------------------------------------------------------------------------------------------------------------------------------------------------------------------------------------------------------------------------------------------------------------------------------------------------------------------------------------------------------------------------------------------------------------------------------------------------------------------------------------------------------------------------------------------------------------------------------------------------------------------------------------------------------------------------------|
| 2021 | Bewunetu Zewude and Tewodros Habtegiorgis | Willingness to Take COVID-19 Vaccine Among People Most at Risk of Exposure in Southern Ethiopia | Pragmatic and observational research | <p>Background: Acceptance of a vaccine or hesitancy towards it have great public health implications as they partly determine the extent to which people are exposed to infections that could have otherwise been prevented. The present study examined the willingness of primary and secondary school teachers, bank employees, and university instructors in southern Ethiopia to take a Covid-19 vaccine and the factors associated with their willingness.;</p> <p>Methods: An institutional-based cross-sectional study design was used with a quantitative research approach. Primary data were gathered mainly through the use of a survey research method in which a self-administered questionnaire was distributed to randomly selected research participants in Wolaita Sodo town. Data analysis was conducted using statistical techniques, including percentages, frequency distributions, and logistic regression analysis.;</p> <p>Results: Research participants generally had a low (46.1%) willingness to take a COVID-19 vaccine. The main reason for most (37%) respondents' hesitancy to take the vaccine is found to be the concern over the safety and/or the side effects of the vaccine (37%), followed by doubt about the vaccine's effectiveness (20.7%), and lack of adequate information (12.7%). Moreover, 38.9% of survey participants revealed that they would like to take a COVID-19 vaccine other than AstraZeneca whereas 61.1% of respondents replied that they do not want to take any kind of COVID-19 vaccine. Furthermore, respondents' willingness to take a COVID-19 vaccine is significantly associated with attitude towards the vaccine (OR = 2.830; 95% CI = 1.834-4.368), belief that Covid-19 exists in the study area (OR = 0.221; 95% CI = 0.083-0.589), the perception that prevalence and death rate reports of the government are real (OR = 0.365; 95% CI = 0.197-0.676), status of chronic diseases (OR = 2.883; 95%CI = 1.039-7.999), and having a close relative/friend ever infected by COVID-19 (OR = 2.602; 95% CI = 1.117-6.063).;</p> <p>Conclusion: The findings of the research demonstrated that there is generally low willingness to take a COVID-19 vaccine among university instructors, bank employees, and primary and secondary school teachers in southern Ethiopia. Therefore, the federal ministry of health, Ethiopian food and drug controlling agency, the media, and all other concerned organizations should create increased awareness about the safety/side effects issues and the need to take the vaccine. (© 2021 Zewude and Habtegiorgis.)</p> |



| Year | Author(s)                                                                                                                                                                      | Title                                                                                                                       | Journal                   | Abstract                                                                                                                                                                                                                                                                                                                                                                                                                                                                                                                                                                                                                                                                                                                                                                                                                                                                                                                                                                                                                                                                                                                                                                                                                                                                                                                                                                                                                                                                                                                                                                                                                                                                                                                                                                                                                                                                                                                                                                                                                                                                                                                                                                                                                                                                                                                        |
|------|--------------------------------------------------------------------------------------------------------------------------------------------------------------------------------|-----------------------------------------------------------------------------------------------------------------------------|---------------------------|---------------------------------------------------------------------------------------------------------------------------------------------------------------------------------------------------------------------------------------------------------------------------------------------------------------------------------------------------------------------------------------------------------------------------------------------------------------------------------------------------------------------------------------------------------------------------------------------------------------------------------------------------------------------------------------------------------------------------------------------------------------------------------------------------------------------------------------------------------------------------------------------------------------------------------------------------------------------------------------------------------------------------------------------------------------------------------------------------------------------------------------------------------------------------------------------------------------------------------------------------------------------------------------------------------------------------------------------------------------------------------------------------------------------------------------------------------------------------------------------------------------------------------------------------------------------------------------------------------------------------------------------------------------------------------------------------------------------------------------------------------------------------------------------------------------------------------------------------------------------------------------------------------------------------------------------------------------------------------------------------------------------------------------------------------------------------------------------------------------------------------------------------------------------------------------------------------------------------------------------------------------------------------------------------------------------------------|
| 2022 | C. Kassa Mekonnen, N. Gizaw Demissie, Z. Wako Beko, Y. Mulu Ferede and H. Kindie Abate                                                                                         | Intent to get vaccinated against COVID-19 pandemic and its associated factors among adults with a chronic medical condition | Int J Afr Nurs Sci        | <p>BACKGROUND: Vaccination intent is defined as the willingness to get vaccinated against a COVID-19 pandemic in a situation where the vaccine is available at no cost. Nevertheless, even with the availability of COVID-19 vaccines, some part of the public is not expected to get vaccinated, mainly due to a phenomenon known as vaccine hesitancy or lack of intention. Furthermore, there is little information available on the intention of people with chronic medical conditions about the COVID-19 vaccines in Ethiopia. OBJECTIVE: The study aimed to assess the intent to get vaccinated against COVID-19 and its associated factors among adults with a chronic medical condition. METHOD: An institutional-based cross-sectional study was conducted from February 15 to March 15, 2021. Simple random sampling was employed to get representative samples. Data were collected by using a structured questionnaire through face to face interviews. The data were entered by Epi Info version 7 and analyzed with SPSS version 20. The data were analyzed by using binary logistic regression. Those variables with a P-value of <math>\leq 0.05</math> were considered significantly associated with the outcome variable. RESULT: In this study, 423 study participants took part with a response rate of 100%. The mean age of the study participants was 50.07 (SD <math>\pm</math> 13.7) with a range of 18-85 years. The intention to get vaccinated against the COVID-19 pandemic was 63.8% [95% CI (58.6-68.2)]. In the multivariable analysis the variables, retiring from the job was [AOR = 2.65, 95% CI (1.02-10.35)], having health insurance coverage [AOR = 1.38, 95%CI (1.04-3.65)], being in the high socio-demographic status [AOR = 1.67, 95%CI (1.01-2.78)], being confident with the Country's health care system [AOR = 2.00, 95%CI (1.15-3.49)], and having good knowledge about COVID-19 [AOR = 6.59, 95% CI (4.02-10.78)] were significant predictors of intent to get vaccinated against COVID-19 pandemic compared. CONCLUSION: The intention of getting vaccinated against the COVID-19 pandemic was relatively low. There has to be a great effort by the health caregivers as well as the government to increase vaccination intake, particularly for these priority groups.</p> |
| 2022 | C. S. Wiysonge, S. M. Alobwede, P. D. C. Katoto, E. B. Kidzeru, E. N. Lumngwena, S. Cooper, R. Goliath, A. Jackson and M. S. Shey                                              | COVID-19 vaccine acceptance and hesitancy among healthcare workers in South Africa                                          | Expert Review of Vaccines | <p>BACKGROUND We assessed willingness to accept vaccination against coronavirus disease 2019 (COVID-19) among healthcare workers(HCWs) at the start of South Africa's vaccination roll-out. RESEARCH DESIGN AND METHODS We conducted a cross-sectional survey among HCWs in Cape Town in March-May 2021 and assessed predictors of vaccination intentions. RESULTS We recruited 395 participants; 64% women, 49% nurses, and 13% physicians. Of these, 233(59.0%) would accept and 163 (41.0%) were vaccine hesitant i.e. would either refuse or were unsure whether they would accept COVID-19 vaccination. People who did not trust that COVID-19 vaccines are effective were the most hesitant (<math>p = 0.038</math>). Older participants and physicians were more likely to accept vaccination than younger participants (<math>p &lt; 0.01</math>) and other HCWs (<math>p = 0.042</math>) respectively. Other predictors of vaccine acceptance were trust that vaccines are compatible with religion (<math>p &lt; 0.001</math>), consideration of benefits and risks of vaccination (<math>p &lt; 0.001</math>), willingness to be vaccinated to protect others (<math>p &lt; 0.001</math>), and viewing vaccination as a collective action for COVID-19 control (<math>p = 0.029</math>). CONCLUSIONS COVID-19 vaccine hesitancy is high among HCWs in Cape Town. Reducing this would require trust-building interventions, including tailored education.</p>                                                                                                                                                                                                                                                                                                                                                                                                                                                                                                                                                                                                                                                                                                                                                                                                                                                         |
| 2022 | Chizoba Wonodi, Chisom Obi-Jeff, Funmilayo Adewumi, Somto Chloe Keluo-Udeke, Rachel Gur-Arie, Carleigh Krubiner, Elana Felice Jaffe, Tobi Bamiduro, Ruth Karron and Ruth Faden | Conspiracy theories and misinformation about COVID-19 in Nigeria: Implications for vaccine demand generation communications | Vaccine                   |                                                                                                                                                                                                                                                                                                                                                                                                                                                                                                                                                                                                                                                                                                                                                                                                                                                                                                                                                                                                                                                                                                                                                                                                                                                                                                                                                                                                                                                                                                                                                                                                                                                                                                                                                                                                                                                                                                                                                                                                                                                                                                                                                                                                                                                                                                                                 |



1  
2  
3  
4  
5  
6  
7  
8  
9  
10  
11  
12  
13  
14  
15  
16  
17  
18  
19  
20  
21  
22  
23  
24  
25  
26  
27  
28  
29  
30  
31  
32  
33  
34  
35  
36  
37  
38  
39  
40  
41  
42  
43  
44  
45  
46

| Year | Author(s)                                                            | Title                                                                                    | Journal  | Abstract                                                                                                                                                                                                                                                                                                                                                                                                                                                                                                                                                                                                                                                                                                                                                                                                                                                                                                                                                                                                                                                                                                                                                                                                                                                                                                                                                                                                                                                                                                                                                                                                                                                                                                                                                                                                                                                                                                                                                                                                                                                                                                                                                                                                                                                       |
|------|----------------------------------------------------------------------|------------------------------------------------------------------------------------------|----------|----------------------------------------------------------------------------------------------------------------------------------------------------------------------------------------------------------------------------------------------------------------------------------------------------------------------------------------------------------------------------------------------------------------------------------------------------------------------------------------------------------------------------------------------------------------------------------------------------------------------------------------------------------------------------------------------------------------------------------------------------------------------------------------------------------------------------------------------------------------------------------------------------------------------------------------------------------------------------------------------------------------------------------------------------------------------------------------------------------------------------------------------------------------------------------------------------------------------------------------------------------------------------------------------------------------------------------------------------------------------------------------------------------------------------------------------------------------------------------------------------------------------------------------------------------------------------------------------------------------------------------------------------------------------------------------------------------------------------------------------------------------------------------------------------------------------------------------------------------------------------------------------------------------------------------------------------------------------------------------------------------------------------------------------------------------------------------------------------------------------------------------------------------------------------------------------------------------------------------------------------------------|
| 2022 | Christoph Strupat, Zemzem Shigute, Arjun S. Bedi and Matthias Rieger | Willingness to take COVID-19 vaccination in low-income countries: Evidence from Ethiopia | PLoS ONE | <p>Background: In low-income countries, vaccination campaigns are lagging, and evidence on vaccine acceptance, a crucial public health planning input, remains scant. This is the first study that reports willingness to take COVID-19 vaccines and its socio-demographic correlates in Ethiopia, Africa's second most populous country. Methods: The analysis is based on a nationally representative survey data of 2,317 households conducted in the informal economy in November 2020. It employs two logistic regression models where the two outcome variables are (i) a household head's willingness to take a COVID-19 vaccine or not, and (ii) if yes if they would also hypothetically pay (an unspecified amount) for it or not. Predictors include age, gender, education, marital status, income category, health insurance coverage, sickness due to COVID-19, chronic illness, trust in government, prior participation in voluntary activities, urban residence. Results: Willingness to take the vaccine was high (88%) and significantly associated with COVID-19 cases in the family, trust in government and pro-social behavior. All other predictors such as gender, education, income, health insurance, chronic illness, urban residence did not significantly predict vaccine willingness at the 5% level. Among those willing to take the vaccine, 33% also answered that they would hypothetically pay (an unspecified amount) for it, an answer that is significantly associated with trust in government, health insurance coverage and income. Conclusion: The results highlight both opportunities and challenges. There is little evidence of vaccine hesitancy in Ethiopia among household heads operating in the informal economy. The role played by trust in government and pro-social behavior in motivating this outcome suggests that policy makers need to consider these factors in the planning of COVID-19 vaccine campaigns in order to foster vaccine uptake. At the same time, as the willingness to hypothetically pay for a COVID-19 vaccine seems to be small, fairly-priced vaccines along with financial support are also needed to ensure further uptake of COVID-19 vaccines. [ABSTRACT FROM AUTHOR]</p> |

For peer review only

| Year | Author(s)                                                                                                                      | Title                                                                                                | Journal                       | Abstract                                                                                                                                                                                                                                                                                                                                                                                                                                                                                                                                                                                                                                                                                                                                                                                                                                                                                                                                                                                                                                                                                                                                                                                                                                                                                                                                                                                                                                                                                                                                                                                                                                                                                                                                                                                                                                                                                                                                                                                                                                                                                                                                                                                                                                                                                                                                                                                                                                                                                                                                                                                                                                                                                                      |
|------|--------------------------------------------------------------------------------------------------------------------------------|------------------------------------------------------------------------------------------------------|-------------------------------|---------------------------------------------------------------------------------------------------------------------------------------------------------------------------------------------------------------------------------------------------------------------------------------------------------------------------------------------------------------------------------------------------------------------------------------------------------------------------------------------------------------------------------------------------------------------------------------------------------------------------------------------------------------------------------------------------------------------------------------------------------------------------------------------------------------------------------------------------------------------------------------------------------------------------------------------------------------------------------------------------------------------------------------------------------------------------------------------------------------------------------------------------------------------------------------------------------------------------------------------------------------------------------------------------------------------------------------------------------------------------------------------------------------------------------------------------------------------------------------------------------------------------------------------------------------------------------------------------------------------------------------------------------------------------------------------------------------------------------------------------------------------------------------------------------------------------------------------------------------------------------------------------------------------------------------------------------------------------------------------------------------------------------------------------------------------------------------------------------------------------------------------------------------------------------------------------------------------------------------------------------------------------------------------------------------------------------------------------------------------------------------------------------------------------------------------------------------------------------------------------------------------------------------------------------------------------------------------------------------------------------------------------------------------------------------------------------------|
| 2021 | D. R. Terefa, A. T. Shama, B. R. Feyisa, A. E. Desisa, E. T. Geta, M. C. Cheme and A. T. Edosa                                 | COVID-19 Vaccine Uptake and Associated Factors Among Health Professionals in Ethiopia                | Infection and Drug Resistance | Background: Ethiopia has received 2.2 million doses of COVID-19 vaccine from the COVID-19 Vaccines Global Access (COVAX) facility and planned to vaccinate 20% of its population by the end of 2021. However, evidence on the current uptake of the vaccine in our country is scanty. Therefore, this study aimed to assess COVID-19 vaccine uptake and associated factors among health professionals in Ethiopia. Methods: A national online cross-sectional E-survey was conducted on COVID-19 vaccine Uptake and associated factors among health professionals in Ethiopia from June 1 to 30, 2021. A semi-structured questionnaire was created on Google forms and disseminated online. The snowball sampling technique through the authors' network with Ethiopian residents on the popular social media like Facebook, telegram, and email was used. Descriptive statistics were performed. Multivariable logistic regression analysis was performed using Statistical Package for Social Sciences version 25, and all variables with P-value <0.05 and adjusted odds ratio at 95% CI were used to declare the predictors of the outcome variable. Results: A total of 522 health professionals participated in the survey, of which about 324 (62.1%) of them were vaccinated with any of the COVID-19 vaccines at least once. The study indicated that COVID-19 vaccine uptake was associated with age range from 35 to 44 years [AOR = 12.97, 95% CI: 2.36–71.21], age beyond 45 years [AOR = 18.95, 95% CI = 2.04–36.29], being male [AOR = 2.91, 95% CI = 1.05,8.09], being only an academician [AOR = 0.23, 95% CI: 0.10–0.49], academicians working in University hospitals [AOR = 0.19, 95% CI: 0.05–0.83], perceiving their family as healthy [AOR = 4.40, 95% CI: 2.21– 8.75], no history of receiving other vaccine before as an adult [AOR = 4.07, 95% CI: 2.07– 8.01] and no history of contact with confirmed COVID-19 patients or clients [AOR = 0.42, 95% CI: 0.20–0.86]. Conclusion: The study found that COVID-19 vaccine uptake among health professionals was low. This was not sufficient to achieve herd immunity as at least nine out of ten health professionals are required for herd immunity. Ages, sex, place of work, perceived family health status, previous experience of receiving a vaccine as an adult and history of contact with COVID-19 clients or patients were the factors that influence the vaccine uptake among health professionals in Ethiopia. Hence, decision makers and health managers should consider instituting mandatory vaccination for health professionals and design strategies for the provision of the vaccine. © 2021 Rikitu Terefa et al. |
| 2022 | D. Yilma, R. Mohammed, S. Getahun Abdela, W. Enbiale, F. Seifu, M. Pareyn, L. Liesenborghs, J. van Griensven and S. van Henten | COVID-19 vaccine acceptability among health care workers in Ethiopia: Do we practice what we preach? | Trop Med Int Health           | OBJECTIVE: We assessed health care workers (HCWs) COVID-19 vaccine acceptability in Ethiopia. METHODS: We carried out a cross sectional survey from February to April 2021 in HCWs from five teaching hospitals. HCWs were selected using convenient sampling and data were collected through a survey link. Descriptive analysis and mixed-effect logistic regression was performed. A total of 1,314 HCWs participated in the study. RESULTS: We found that 25.5% (n=332) of the HCWs would not accept a COVID-19 vaccine and 20.2% (n=264) were not willing to recommend COVID-19 vaccination to others. Factors associated with vaccine non-acceptance were female sex (AOR=1.8; 95% CI: 1.3-2.5), the perception that vaccines are unsafe (AOR=15.0; 95% CI: 8.7-25.9), not considering COVID-19 as health risk (AOR=4.4; 95% CI: 2.0-9.5) and being unconcerned about contracting COVID-19 at work (AOR=3.5; 95% CI: 1.5-8.4). Physicians were more willing to accept vaccination than other HCWs. Higher vaccine acceptability was also noted with increasing age. Participants most often indicated safety concerns as the determining factor on their decision to get vaccinated or not. CONCLUSION: Overall, a quarter of HCWs would not accept a COVID-19 vaccine. Communications and trainings should address vaccine safety concerns. Additionally, emphasis should be given to showing current and future impact of COVID-19 on the personal, public and country level unless control efforts are improved. Interventions aimed to increase vaccine uptake should focus their efforts on younger and non-physician HCWs.                                                                                                                                                                                                                                                                                                                                                                                                                                                                                                                                                                                                                                                                                                                                                                                                                                                                                                                                                                                                                                                                        |
| 2021 | Ekaete Alice Tobin, Martha Okonofua, Azuka Adeke and Andrew Obi                                                                | Willingness to accept a COVID-19 vaccine in Nigeria: a population-based cross-sectional study        | Cent Afr J Public Health      |                                                                                                                                                                                                                                                                                                                                                                                                                                                                                                                                                                                                                                                                                                                                                                                                                                                                                                                                                                                                                                                                                                                                                                                                                                                                                                                                                                                                                                                                                                                                                                                                                                                                                                                                                                                                                                                                                                                                                                                                                                                                                                                                                                                                                                                                                                                                                                                                                                                                                                                                                                                                                                                                                                               |

| Year | Author(s)                                                                                                                                                                                                                         | Title                                                                                                              | Journal                                     | Abstract                                                                                                                                                                                                                                                                                                                                                                                                                                                                                                                                                                                                                                                                                                                                                                                                                                                                                                                                                                                                                                                                                                                                                                                                                                                                                                                                                                                                                                                                                                                                                                                                                                                                                                                                                                                                                                                                           |
|------|-----------------------------------------------------------------------------------------------------------------------------------------------------------------------------------------------------------------------------------|--------------------------------------------------------------------------------------------------------------------|---------------------------------------------|------------------------------------------------------------------------------------------------------------------------------------------------------------------------------------------------------------------------------------------------------------------------------------------------------------------------------------------------------------------------------------------------------------------------------------------------------------------------------------------------------------------------------------------------------------------------------------------------------------------------------------------------------------------------------------------------------------------------------------------------------------------------------------------------------------------------------------------------------------------------------------------------------------------------------------------------------------------------------------------------------------------------------------------------------------------------------------------------------------------------------------------------------------------------------------------------------------------------------------------------------------------------------------------------------------------------------------------------------------------------------------------------------------------------------------------------------------------------------------------------------------------------------------------------------------------------------------------------------------------------------------------------------------------------------------------------------------------------------------------------------------------------------------------------------------------------------------------------------------------------------------|
| 2021 | Elizabeth O. Oduwole, Tonya M. Esterhuizen, Hassan Mahomed and Charles S. Wiysonge                                                                                                                                                | Estimating Vaccine Confidence Levels among Healthcare Staff and Students of a Tertiary Institution in South Africa | Vaccines                                    | Healthcare workers were the first group scheduled to receive COVID-19 vaccines when they became available in South Africa. Therefore, estimating vaccine confidence levels and intention to receive COVID-19 vaccines among healthcare workers ahead of the national vaccination roll-out was imperative. We conducted an online survey from 4 February to 7 March 2021, to assess vaccine sentiments and COVID-19 vaccine intentions among healthcare staff and students at a tertiary institution in South Africa. We enrolled 1015 participants (74.7% female). Among the participants, 89.5% (confidence interval (CI) 87.2-91.4) were willing to accept a COVID-19 vaccine, 95.4% (CI 93.9-96.6) agreed that vaccines are important for them, 95.4% (CI 93.8-96.6) that vaccines are safe, 97.4% (CI 96.2-98.3) that vaccines are effective, and 96.1% (CI 94.6-97.2) that vaccines are compatible with religion. Log binomial regression revealed statistically significant positive associations between COVID-19 vaccine acceptance and the belief that vaccines are safe (relative risk (RR) 32.2, CI 4.67-221.89), effective (RR 21.4, CI 3.16-145.82), important for children (RR 3.5, CI 1.78-6.99), important for self (RR 18.5, CI 4.78-71.12), or compatible with religion (RR 2.2, CI 1.46-3.78). The vaccine confidence levels of the study respondents were highly positive. Nevertheless, this could be further enhanced by targeted interventions.                                                                                                                                                                                                                                                                                                                                                                                                             |
| 2021 | F. A. Gbeasor-Komlanvi, K. A. Afanvi, Y. R. Konu, Y. Agbobli, A. J. Sadio, M. K. Tchankoni, W. I. C. Zida-Compaore, J. Nayo-Apetsianyi, S. Agoro, A. Lambokale, D. Nyametso, T. N'Tapi, K. Aflagah, M. Mijiyawa and D. K. Ekouevi | Prevalence and factors associated with COVID-19 vaccine hesitancy in health professionals in Togo, 2021            | Public health in practice (Oxford, England) | Objectives: The aim of this study was to assess the prevalence and factors associated with COVID-19 vaccine hesitancy among health professionals (HPs) in Togo.; Study Design: Cross-sectional study.; Methods: The study was conducted between 24 February and 3 March 2021 among HPs in Togo. Data on sociodemographic characteristics and intention of vaccination were collected using an online questionnaire. Willingness to get vaccinated against COVID-19 was assessed using a single item: "Would you be willing to be vaccinated against COVID-19?". Responses were grouped into three categories: acceptance ( Yes, I will get vaccinated ), hesitancy ( Not decided yet ) and refusal ( No ). Multinomial regression analyses were performed to assess factors associated with vaccine hesitancy or refusal.; Results: A total of 1115 HPs (79.1% male) with a median age of 35 years were enrolled in the study. Vaccine acceptance, hesitancy and refusal were 44.1%, 32.2% and 23.7%, respectively. Female gender was associated with an increased risk of hesitancy (adjusted odds ratio [aOR] = 1.93; p = 0.005) and refusal (aOR = 1.77; p = 0.005). Participant age $\geq$ 50 years, having a personal history of COVID-19 infection and a good knowledge of COVID-19 vaccination were factors that reduced the risk of refusal [(aOR = 0.30; p < 0.001), (aOR = 0.43; p = 0.031) and (aOR = 0.62; p = 0.020)] or hesitancy [(aOR = 0.53; p = 0.005), (aOR = 0.13; p < 0.001) and (aOR = 0.35; p < 0.001)] of the vaccine.; Conclusions: Acceptance of the COVID-19 vaccine before the vaccination campaign was mixed among HPs, especially young HPs. Sensitisation and information campaigns should be reinforced to combat misinformation and increase COVID-19 vaccination acceptance in the context of the ongoing global pandemic. (© 2021 The Authors.) |

| Year | Author(s)                                                                                                                                                                                            | Title                                                                                   | Journal                                    | Abstract                                                                                                                                                                                                                                                                                                                                                                                                                                                                                                                                                                                                                                                                                                                                                                                                                                                                                                                                                                                                                                                                                                                                                                                                                                                                                                                                                                                                                                                                                                                                                                                                                                                                                                                                                                                                                                                                                                                                                                                                                                                                                                                                                                         |
|------|------------------------------------------------------------------------------------------------------------------------------------------------------------------------------------------------------|-----------------------------------------------------------------------------------------|--------------------------------------------|----------------------------------------------------------------------------------------------------------------------------------------------------------------------------------------------------------------------------------------------------------------------------------------------------------------------------------------------------------------------------------------------------------------------------------------------------------------------------------------------------------------------------------------------------------------------------------------------------------------------------------------------------------------------------------------------------------------------------------------------------------------------------------------------------------------------------------------------------------------------------------------------------------------------------------------------------------------------------------------------------------------------------------------------------------------------------------------------------------------------------------------------------------------------------------------------------------------------------------------------------------------------------------------------------------------------------------------------------------------------------------------------------------------------------------------------------------------------------------------------------------------------------------------------------------------------------------------------------------------------------------------------------------------------------------------------------------------------------------------------------------------------------------------------------------------------------------------------------------------------------------------------------------------------------------------------------------------------------------------------------------------------------------------------------------------------------------------------------------------------------------------------------------------------------------|
| 2021 | F. Shiferie, O. Sada, T. Fenta, M. Kaba and A. M. Fentie                                                                                                                                             | Exploring reasons for COVID-19 vaccine hesitancy among healthcare providers in Ethiopia | Pan Afr Med J                              | <p>INTRODUCTION: the World Health Organization has identified vaccine hesitancy as one of the top ten threats to global health. The purpose of this study was to explore factors contributing to COVID-19 vaccine hesitancy among healthcare providers, their perspectives regarding vaccine uptake by the public and their recommendations to improve vaccine uptake in Ethiopia. METHODS: a phenomenological qualitative study was conducted among purposively selected healthcare providers working in the Ministry of Health (MoH), regulatory authority, public and private hospitals and health centres who hesitated to take the COVID-19 vaccine in Addis Ababa, Ethiopia in June 2021. A total of twenty in-depth interviews were conducted using a semi-structured open-ended interview guide. Participants included nurses, physicians, pharmacists, health officers, Medical Laboratory technologists and midwives. A qualitative content analysis approach was chosen to analyse the data. RESULTS: all the participants agreed (n=20) that lack of consistent information and inadequate evidence about COVID-19 vaccine safety, efficacy and quality were the main reasons for COVID-19 vaccine hesitancy. History of perceived and confirmed COVID-19 infection history, misinformation, religious views, unknown short and long-term effects of the vaccine and undefined length of time of vaccine's protection were also other reasons mentioned by the participants. CONCLUSION: healthcare providers were hesitant toward COVID-19 vaccine mainly due to lack of clear evidence regarding the vaccine's short and long-term safety, efficacy and quality profiles. Hence, the long-term safety and efficacy of the vaccine should be extensively studied and evidence dissemination and communication should be clear and transparent.</p>                                                                                                                                                                                                                                                                                                                  |
| 2021 | Felix Bongomin, Ronald Olum, Irene Andia-Biraro, Frederick Nelson Nakwagala, Khalid Hudow Hassan, Dianah Rhoda Nassozi, Mark Kaddumukasa, Pauline Byakika-Kibwika, Sarah Kiguli and Bruce J. Kirenga | COVID-19 vaccine acceptance among high-risk populations in Uganda                       | Therapeutic advances in infectious disease | <p>Background: Immunization is an important strategy for controlling the COVID-19 pandemic. COVID-19 vaccination was recently launched in Uganda, with prioritization to healthcare workers and high-risk individuals. In this study, we aimed to determine the acceptability of COVID-19 vaccine among persons at high risk of COVID-19 morbidity and mortality in Uganda.; Methods: Between 29 March and 14 April 2021, we conducted a cross-sectional survey consecutively recruiting persons at high risk of severe COVID-19 (diabetes mellitus, HIV and cardiovascular disease) attending Kiruddu National Referral Hospital outpatient clinics. A trained research nurse administered a semi-structured questionnaire assessing demographics, COVID-19 vaccine related attitudes and acceptability. Descriptive statistics, bivariate and multivariable analyses were performed using STATA 16.; Results: A total of 317 participants with a mean age <math>51.5 \pm 14.1</math> years were recruited. Of this, 184 (60.5%) were female. Overall, 216 (70.1%) participants were willing to accept the COVID-19 vaccine. The odds of willingness to accept COVID-19 vaccination were four times greater if a participant was male compared with if a participant was female [adjusted odds ratio (AOR): 4.1, 95% confidence interval (CI): 1.8-9.4, <math>p = 0.00</math>]. Participants who agreed (AOR: 0.04, 95% CI: 0.01-0.38, <math>p = 0.003</math>) or strongly agreed (AOR: 0.04, 95% CI: 0.01-0.59, <math>p = 0.005</math>) that they have some immunity against COVID-19 were also significantly less likely to accept the vaccine. Participants who had a history of vaccination hesitancy for their children were also significantly less likely to accept the COVID-19 vaccine (AOR: 0.1, 95% CI: 0.01-0.58, <math>p = 0.016</math>); Conclusion: The willingness to receive a COVID-19 vaccine in this group of high-risk individuals was comparable to the global COVID-19 vaccine acceptance rate. Increased sensitization, myth busting and utilization of opinion leaders to encourage vaccine acceptability is recommended. (© The Author(s), 2021.)</p> |

| Year | Author(s)                                                                                  | Title                                                                                                                                                                | Journal               | Abstract                                                                                                                                                                                                                                                                                                                                                                                                                                                                                                                                                                                                                                                                                                                                                                                                                                                                                                                                                                                                                                                                                                                                                                                                                                                                                                                                                                                                                                                                                                                                                                                                                                                                                                                                                                                                                                                                                                                                                                                                                                                                                                                                                                                                                                                                                                                                                                                                                                                                                                          |
|------|--------------------------------------------------------------------------------------------|----------------------------------------------------------------------------------------------------------------------------------------------------------------------|-----------------------|-------------------------------------------------------------------------------------------------------------------------------------------------------------------------------------------------------------------------------------------------------------------------------------------------------------------------------------------------------------------------------------------------------------------------------------------------------------------------------------------------------------------------------------------------------------------------------------------------------------------------------------------------------------------------------------------------------------------------------------------------------------------------------------------------------------------------------------------------------------------------------------------------------------------------------------------------------------------------------------------------------------------------------------------------------------------------------------------------------------------------------------------------------------------------------------------------------------------------------------------------------------------------------------------------------------------------------------------------------------------------------------------------------------------------------------------------------------------------------------------------------------------------------------------------------------------------------------------------------------------------------------------------------------------------------------------------------------------------------------------------------------------------------------------------------------------------------------------------------------------------------------------------------------------------------------------------------------------------------------------------------------------------------------------------------------------------------------------------------------------------------------------------------------------------------------------------------------------------------------------------------------------------------------------------------------------------------------------------------------------------------------------------------------------------------------------------------------------------------------------------------------------|
| 2021 | G. Asmare, K. Abebe, N. Atnafu, G. Asnake, A. Yeshambel, E. Alem, E. Chekol and T. Asmamaw | Behavioral intention and its predictors toward COVID-19 vaccination among people most at risk of exposure in Ethiopia: applying the theory of planned behavior model | Hum Vaccin Immunother | <p>Acceptance of a vaccine or hesitancy has great public health implications as these partly determine the extent to which people are exposed to infections that could have otherwise been prevented. There is a high need for a more updated understanding of the behavioral intention of the public toward COVID-19 vaccines and associated factors in light of the COVID-19 pandemic to give appropriate public health messages or actions. Thus, the study aimed to assess behavioral intention and its predictors toward COVID-19 vaccine among people most at risk of exposure in Ethiopia. A population-based anonymous online survey was conducted on individuals aged greater than 18 years from May 01, 2021 to June 30, 2021. The data were collected using a convenient sampling method through an online self-administered, structured questionnaire that was created onto Google survey tool (Google Forms) and disseminated to the public on different social media channels through online sharable platforms. Descriptive statistics were done. Bivariate and multivariable logistic regression was done to show the association of behavioral intention toward the COVID-19 vaccine. The associations of variables were declared with the use of 95% CI and P-value. A total of 1080 participants were included in this survey. Seven hundred one (64.9%) of the respondents had a behavioral intention to receive the COVID-19 vaccine. Males (AOR = 1.41 (95% CI = 1.004-2.53)), degree in level of education (AOR = 0.815 (95% CI = 0.254-0.916)), good knowledge (AOR = 4.21 (95% CI = 2.871-6.992)), attitude (AOR = 2.78 (95% CI = 1.654-4.102)), subjective norm (AOR = 1.214 (95% CI = 1.008-4.309)) and perceived behavioral control (AOR = 3.531 (95% CI = 1.689-5.201)) were found to be significantly associated with behavioral intention toward COVID-19 vaccine. Generally, the prevalence of behavioral intention in Ethiopia is low. Males, degree level of education, knowledge about vaccine, attitude toward vaccine subjective norm and perceived behavioral control were found to be significantly associated with intention to receive COVID-19 vaccine. Health education and communication from government sources are very crucial methods to alleviate the negative attitude, poor knowledge, and action need to improve or change the attitude and behavior of influential people within the community or organization to improve intention to take the vaccine.</p> |
| 2021 | G. Murewanhema, T. V. Burukai, B. Chireka and E. Kunonga                                   | Implementing national COVID-19 vaccination programmes in sub-Saharan Africa- early lessons from Zimbabwe: a descriptive cross-sectional study                        | Pan Afr Med J         | <p>INTRODUCTION: Zimbabwe was one of the first countries to run a national COVID-19 vaccination programme in Africa. Lessons learnt could inform the roll-out of similar programmes in sub-Saharan Africa. To describe the trends of uptake of the COVID-19 vaccines in the first three months (February - May 2021) of the Zimbabwe vaccination programme and the lessons learnt. METHODS: a secondary descriptive analysis of routinely available COVID-19 vaccination data extracted from the daily situation reports published by the Ministry of Health and Child Care. RESULTS: in the first three months of the programme, 1 020 078 doses were administered, with 675 678 being first doses and 344 400 were second doses. Using population estimates, at three months, 5.2% of the population had received at least one dose and 2.6% had received the full two doses. Uptake was initially slow, followed by a gradual, and subsequently an exponential increase. CONCLUSION: by the end of May 2021, Zimbabwe had rolled out one of the largest COVID-19 vaccination programmes in sub-Saharan Africa. The uptake followed a pattern and trend that is consistent with vaccine hesitancy reported in the literature, driven by a combination of confidence, complacency and convenience factors. The gradual increase in uptake followed a series of national and local community engagement programmes. The roll-out of similar programmes must recognise likely patterns of uptake across the population and ensure plans are in place to address vaccine hesitancy. The available data did not allow granular analysis to understand the demographics of people who participated in the programme, which is important for surveillance, targeted action, preventing inequalities and ensuring adequate and proportionate protection of residents prioritising the most vulnerable. Further analysis of the process, outcomes and impact of the programme will be helpful in informing the roll-out of similar programmes across Africa.</p>                                                                                                                                                                                                                                                                                                                                                                                                                                                         |

| Year | Author(s)                                                                                                                                         | Title                                                                                                                                                 | Journal                       | Abstract                                                                                                                                                                                                                                                                                                                                                                                                                                                                                                                                                                                                                                                                                                                                                                                                                                                                                                                                                                                                                                                                                                                                                                                                                                                                                                                                                                                                                                                                                                                                                                                                                                                                                                                                                                                                                                                                                                                                                                                                                                                                                                                                                                                                                                                                                                                                                               |
|------|---------------------------------------------------------------------------------------------------------------------------------------------------|-------------------------------------------------------------------------------------------------------------------------------------------------------|-------------------------------|------------------------------------------------------------------------------------------------------------------------------------------------------------------------------------------------------------------------------------------------------------------------------------------------------------------------------------------------------------------------------------------------------------------------------------------------------------------------------------------------------------------------------------------------------------------------------------------------------------------------------------------------------------------------------------------------------------------------------------------------------------------------------------------------------------------------------------------------------------------------------------------------------------------------------------------------------------------------------------------------------------------------------------------------------------------------------------------------------------------------------------------------------------------------------------------------------------------------------------------------------------------------------------------------------------------------------------------------------------------------------------------------------------------------------------------------------------------------------------------------------------------------------------------------------------------------------------------------------------------------------------------------------------------------------------------------------------------------------------------------------------------------------------------------------------------------------------------------------------------------------------------------------------------------------------------------------------------------------------------------------------------------------------------------------------------------------------------------------------------------------------------------------------------------------------------------------------------------------------------------------------------------------------------------------------------------------------------------------------------------|
| 2022 | H. Adedeji-Adenola, O. A. Olugbake and S. A. Adeosun                                                                                              | Factors influencing COVID-19 vaccine uptake among adults in Nigeria                                                                                   | PLoS One                      | <p>BACKGROUND: Emerging variants of Coronavirus disease 2019 (COVID-19) has claimed over 3000 lives in Nigeria and vaccination remains a means of reducing the death toll. Despite ongoing efforts by the government to ensure COVID-19 vaccination of most residents to attain herd immunity, myths and beliefs have adversely shaped the perception of most Nigerians, challenging the uptake of COVID-19 vaccine. This study aimed to assess the factors influencing the awareness, perception, and willingness to receive COVID-19 vaccine among Nigerian adults.</p> <p>METHODS: A cross-sectional online nationwide study was conducted from April to June 2021 among Nigerian adult population using the snowballing method. Descriptive analysis was used to summarise the data. Univariate and multivariate analysis was used to identify the predictors of COVID-19 uptake among the respondents. A p value &lt;0.05 was considered significant. RESULTS: A total of 1058 completed forms were analysed and 63.9% were females. The mean age was 40.8 years±12.2 years. Most of the respondents (740; 69.5%) had satisfactory awareness of the vaccination exercise. The media was the main source of information. Health workers reported higher level of awareness (aOR = 1.822, 95% CI: 1.388-2.524, p&lt;0.001). Respondents that are Christians and Muslims had better awareness compared to the unaffiliated (aOR = 6.398, 95% CI: 1.918-21.338, P = 0.003) and (aOR = 7.595, 95% CI: 2.280-25.301, p&lt;0.001) respectively. There is average score for perception statements (566; 53.2%) towards COVID-19 vaccination. Close to half of the respondents (44.2%) found the short period of COVID-19 production worrisome. Majority of the respondents were willing to get the vaccine (856; 80.9%). Those without a prior diagnosis of COVID-19 had a lower willingness to get vaccinated (aOR = 0.210 (95% CI: 0.082-0.536) P = 0.001).</p> <p>CONCLUSION: The study revealed a high level of awareness, willingness to receive the vaccine and moderate perception towards the vaccination activities. Influencing factors that significantly affects awareness were religion, occupation, education and prior diagnosis of COVID-19; for perception and willingness-occupation, and prior diagnosis of the COVID-19 were influencing factors.</p> |
| 2021 | Haimanot Abebe, Solomon Shitu and Ayenew Mose                                                                                                     | Understanding of COVID-19 vaccine knowledge, attitude, acceptance, and determinates of COVID-19 vaccine acceptance among adult population in Ethiopia | Infection and drug resistance |                                                                                                                                                                                                                                                                                                                                                                                                                                                                                                                                                                                                                                                                                                                                                                                                                                                                                                                                                                                                                                                                                                                                                                                                                                                                                                                                                                                                                                                                                                                                                                                                                                                                                                                                                                                                                                                                                                                                                                                                                                                                                                                                                                                                                                                                                                                                                                        |
| 2021 | J. D. Ditekemena, D. M. Nkamba, A. Mutwadi, H. M. Mavoko, J. N. Siewe Fodjo, C. Luhata, M. Obimpeh, S. Van Hees, J. B. Nachege and R. Colebunders | COVID-19 Vaccine Acceptance in the Democratic Republic of Congo: A Cross-Sectional Survey                                                             | Vaccines (Basel)              | <p>We investigated the level of willingness for COVID-19 vaccination in the Democratic Republic of Congo (DRC). Data were collected between 24 August 2020 and 8 September 2020 through an online survey. A total of 4131 responses were included; mean age of respondents was 35 years (standard deviation: 11.5); 68.4% were females; 71% had elementary or secondary school education. One fourth (24.1%) were convinced that COVID-19 did not exist. Overall, 2310 (55.9%) indicated they were willing to be vaccinated. In a multivariable regression model, belonging to the middle and high-income category (OR = 1.85, CI: 1.46-2.35 and OR = 2.91, CI: 2.15-3.93, respectively), being tested for COVID-19 (OR = 4.71, CI: 3.62-6.12; p &lt; 0.001), COVID-19 community vaccine acceptance (OR = 14.45, CI: 2.91-71.65; p = 0.001) and acknowledging the existence of COVID-19 (OR = 6.04, CI: 4.42-8.23; p &lt; 0.001) were associated with an increased willingness to be vaccinated. Being a healthcare worker was associated with a decreased willingness for vaccination (OR = 0.46, CI: 0.36-0.58; p &lt; 0.001). In conclusion, the current willingness for COVID-19 vaccination among citizens of the DRC is too low to dramatically decrease community transmission. Of great concern is the low intention of immunization among healthcare workers. A large sensitization campaign will be needed to increase COVID-19 vaccine acceptance.</p>                                                                                                                                                                                                                                                                                                                                                                                                                                                                                                                                                                                                                                                                                                                                                                                                                                                                                                      |

| Year | Author(s)                                                                                                                                        | Title                                                                                                                                    | Journal                         | Abstract                                                                                                                                                                                                                                                                                                                                                                                                                                                                                                                                                                                                                                                                                                                                                                                                                                                                                                                                                                                                                                                                                                                                                                                                                                                                                                                                                                                                                                                                                                                              |
|------|--------------------------------------------------------------------------------------------------------------------------------------------------|------------------------------------------------------------------------------------------------------------------------------------------|---------------------------------|---------------------------------------------------------------------------------------------------------------------------------------------------------------------------------------------------------------------------------------------------------------------------------------------------------------------------------------------------------------------------------------------------------------------------------------------------------------------------------------------------------------------------------------------------------------------------------------------------------------------------------------------------------------------------------------------------------------------------------------------------------------------------------------------------------------------------------------------------------------------------------------------------------------------------------------------------------------------------------------------------------------------------------------------------------------------------------------------------------------------------------------------------------------------------------------------------------------------------------------------------------------------------------------------------------------------------------------------------------------------------------------------------------------------------------------------------------------------------------------------------------------------------------------|
| 2021 | J. Dula, A. Mulhanga, A. Nhanombe, L. Cumbi, A. Júnior, J. Gwatsvaira, J. N. Siewe Fodjo, E. F. De Moura Villela, S. Chicumbe and R. Colebunders | Covid-19 vaccine acceptability and its determinants in mozambique: An online survey                                                      | Vaccines                        | A high worldwide SARS-CoV-2 vaccine coverage must be attained to stop the COVID-19 pandemic. In this study, we assessed the level of willingness of Mozambicans to be vaccinated against COVID-19. Data were collected between 11 and 20 March 2021, through a self-administered online survey. Of the 1878 respondents, 30.1% were healthcare workers, 58.3% were aged between 18 and 35 years, 60% were male, and 38.5% were single. Up to 43% had been tested for COVID-19 and 29% had tested positive. Overall vaccine acceptability was 71.4% (86.6% among healthcare workers, 64.8% among other respondents, $p < 0.001$ ). Reasons for vaccine hesitancy included: Fear of vaccine side effects (29.6%) and the belief that the vaccine is not effective (52%). The acceptability of the SARSCoV-2 vaccine increased with increasing vaccine efficacy. Using logistic regression, determinants for acceptability of the vaccine were: Older age, a past COVID-19 test, a concern of becoming (re)infected by COVID-19, having a chronic disease, and considering vaccination important for personal and community health. In conclusion, vaccine acceptability in Mozambique was relatively high among healthcare workers but significantly lower in the rest of the population. This suggests that there is a need to educate the general population about SARS-CoV-2 vaccination and its importance. © 2021 by the authors.                                                                                                  |
| 2020 | Jeffrey V. Lazarus, Katarzyna Wyka, Lauren Rauh, Kenneth Rabin, Scott Ratzan, Lawrence O. Gostin, Heidi J. Larson and Ayman El-Mohandes          | Hesitant or not? The association of age, gender, and education with potential acceptance of a COVID-19 vaccine: A country-level analysis | Journal of Health Communication | In December 2020, the first COVID-19 vaccines were approved. Despite more than 85 million reported cases and 1.8 million known deaths, millions worldwide say they may not accept it. This study assesses the associations of age, gender, and level of education with vaccine acceptance, from a random sample of 13,426 participants selected from 19 high-COVID-19 burden countries in June 2020. Based on univariable and multivariable logistic regression, several noteworthy trends emerged: women in France, Germany, Russia, and Sweden were significantly more likely to accept a vaccine than men in these countries. Older ( $\geq 50$ ) people in Canada, Poland, France, Germany, Sweden, and the UK were significantly more favorably disposed to vaccination than younger respondents, but the reverse trend held in China. Highly educated individuals in Ecuador, France, Germany, India, and the US reported that they will accept a vaccine, but higher education levels were associated with lower vaccination acceptance in Canada, Spain, and the UK. Heterogeneity by demographic factors in the respondents' willingness to accept a vaccine if recommended by employers were substantial when comparing responses from Brazil, Ecuador, France, India, Italy, Mexico, Poland, Russia, South Africa, South Korea, Sweden, and the US. This information should help public health authorities target vaccine promotion messages more effectively. (PsyInfo Database Record (c) 2021 APA, all rights reserved) |



| Year | Author(s)                                                                                                                                                                     | Title                                                                                                           | Journal                      | Abstract                                                                                                                                                                                                                                                                                                                                                                                                                                                                                                                                                                                                                                                                                                                                                                                                                                                                                                                                                                                                                                                                                                                                                                                                                                                                                                                                                                                                                                                                                                                                                                                                                                                                                                                                                                                                                                                                                                                                                                                                          |
|------|-------------------------------------------------------------------------------------------------------------------------------------------------------------------------------|-----------------------------------------------------------------------------------------------------------------|------------------------------|-------------------------------------------------------------------------------------------------------------------------------------------------------------------------------------------------------------------------------------------------------------------------------------------------------------------------------------------------------------------------------------------------------------------------------------------------------------------------------------------------------------------------------------------------------------------------------------------------------------------------------------------------------------------------------------------------------------------------------------------------------------------------------------------------------------------------------------------------------------------------------------------------------------------------------------------------------------------------------------------------------------------------------------------------------------------------------------------------------------------------------------------------------------------------------------------------------------------------------------------------------------------------------------------------------------------------------------------------------------------------------------------------------------------------------------------------------------------------------------------------------------------------------------------------------------------------------------------------------------------------------------------------------------------------------------------------------------------------------------------------------------------------------------------------------------------------------------------------------------------------------------------------------------------------------------------------------------------------------------------------------------------|
| 2021 | Jerome Nyhalah Dinga, Leontine Kouemou Sinda and Vincent P. K. Titanji                                                                                                        | Assessment of Vaccine Hesitancy to a COVID-19 Vaccine in Cameroonian Adults and Its Global Implication          | Vaccines                     | Since the outbreak of COVID-19 in December 2019, no global consensus treatment has been developed and generally accepted for the disease. However, eradicating the disease will require a safe and efficacious vaccine. In order to prepare for the eventual development of a safe and efficacious COVID-19 vaccine and to enhance its uptake, it is imperative to assess vaccine hesitancy in Cameroonians. After obtaining ethical clearance from the Institutional Review Board of the University of Buea, a questionnaire was administered (May-August 2020) to consenting adults either online or in person. A qualitative thematic analysis was done to analyze the participants' answers to the open questions. A deductive approach was used, that is, the codes and patterns according to the World Health Organization (WHO) Strategic Advisory Group of Experts (SAGE) Working Group Matrix of Determinants of vaccine hesitancy. The number of consenting adult Cameroonians who completed the questionnaire were 2512 (Two thousand five hundred and twelve). Vaccine hesitancy to a COVID-19 vaccine was 84.6% in Cameroonians. Using the WHO recommended Matrix of Determinant of Vaccine hesitancy, the most prominent determinants observed in this study were: Communication and Media Environment, Perception of pharmaceutical industry, Reliability and/or source of vaccine and cost. Most Cameroonians agree that even though there are benefits of a clinical trial, they will prefer it should be done out of the continent and involving African scientists for eventual acceptance and uptake. The concerns of safety, efficacy and confidence has to be addressed using a Public Engagement approach if a COVID-19 vaccine has to be administered successfully in Africa or Cameroon specifically. Since this study was carried out following WHO standards, its result can be compared to those of other studies carried out in different cultural settings using similar standards. |
| 2021 | Julio S Solís Arce, Shana S Warren, Niccolò F Meriggi, Alexandra Scacco, Nina McMurry, Maarten Voors, Georgiy Syunyaev, Aryn Abdul Malik, Samya Aboutajdine and Opeyemi Adejo | COVID-19 vaccine acceptance and hesitancy in low- and middle-income countries                                   | Nature medicine              |                                                                                                                                                                                                                                                                                                                                                                                                                                                                                                                                                                                                                                                                                                                                                                                                                                                                                                                                                                                                                                                                                                                                                                                                                                                                                                                                                                                                                                                                                                                                                                                                                                                                                                                                                                                                                                                                                                                                                                                                                   |
| 2021 | Kegnie Shitu, Maereg Wolde, Simegnew Handebo and Ayenew Kassie                                                                                                                | Acceptance and willingness to pay for COVID-19 vaccine among school teachers in Gondar City, Northwest Ethiopia | Tropical medicine and health |                                                                                                                                                                                                                                                                                                                                                                                                                                                                                                                                                                                                                                                                                                                                                                                                                                                                                                                                                                                                                                                                                                                                                                                                                                                                                                                                                                                                                                                                                                                                                                                                                                                                                                                                                                                                                                                                                                                                                                                                                   |



| Year | Author(s)                                                                                 | Title                                                                                                                                     | Journal  | Abstract                                                                                                                                                                                                                                                                                                                                                                                                                                                                                                                                                                                                                                                                                                                                                                                                                                                                                                                                                                                                                                                                                                                                                                                                                                                                                                                                                                                                                                                                                                                                                                                                                                                                                                                                                                                                                                                       |
|------|-------------------------------------------------------------------------------------------|-------------------------------------------------------------------------------------------------------------------------------------------|----------|----------------------------------------------------------------------------------------------------------------------------------------------------------------------------------------------------------------------------------------------------------------------------------------------------------------------------------------------------------------------------------------------------------------------------------------------------------------------------------------------------------------------------------------------------------------------------------------------------------------------------------------------------------------------------------------------------------------------------------------------------------------------------------------------------------------------------------------------------------------------------------------------------------------------------------------------------------------------------------------------------------------------------------------------------------------------------------------------------------------------------------------------------------------------------------------------------------------------------------------------------------------------------------------------------------------------------------------------------------------------------------------------------------------------------------------------------------------------------------------------------------------------------------------------------------------------------------------------------------------------------------------------------------------------------------------------------------------------------------------------------------------------------------------------------------------------------------------------------------------|
| 2021 | Lauren McAbee, Oscar Tapera and Mufaro Kanyangarara                                       | Factors Associated with COVID-19 Vaccine Intentions in Eastern Zimbabwe: A Cross-Sectional Study                                          | Vaccines | Vaccines are one of the most effective public health strategies to protect against infectious diseases, yet vaccine hesitancy has emerged as a global health threat. Understanding COVID-19 knowledge and attitudes and their association with vaccine intentions can help the targeting of strategies to increase vaccination uptake and achieve herd immunity. The goal of this study was to assess COVID-19 knowledge, attitudes, and behaviors, and identify factors associated with COVID-19 vaccine intentions among heads of households in Manicaland Province, Zimbabwe. A cross-sectional survey was conducted in May 2021 among 551 randomly selected households. Data were collected on socio-demographic characteristics, and knowledge, attitudes, and behaviors regarding COVID-19 and the vaccines. More than half (55.7%) of the respondents reported intending to vaccinate themselves or their households. Multivariate logistic regression indicated that the likelihood of vaccine intentions was most strongly associated with confidence in vaccine safety. Additionally, the odds of intending to get vaccinated were significantly higher among heads of households who were male, had a higher level of education, and identified vaccination and face mask usage as prevention measures. Among perceived motivators to vaccinate, recommendations from the World Health Organization and availability of the vaccine free of charge increased the likelihood of vaccine intentions, while country of vaccine manufacturer posed a barrier to vaccine intentions. As the vaccine rollout in Zimbabwe continues, efforts to increase COVID-19 vaccination coverage and achieve herd immunity should target females and less educated populations and be tailored to address concerns about vaccine safety and country of manufacturer. |
| 2022 | Lulin Zhou, Sabina Ampon-Wireko, Xinglong Xu, Prince Edwudzie Quansah and Ebenezer Larnyo | Media attention and Vaccine Hesitancy: Examining the mediating effects of Fear of COVID-19 and the moderating role of Trust in leadership | PLoS ONE | Vaccination has emerged as the most cost-effective public health strategy for maintaining population health, with various social and economic benefits. These vaccines, however, cannot be effective without widespread acceptance. The present study examines the effect of media attention on COVID-19 vaccine hesitancy by incorporating fear of COVID-19 as a mediator, whereas trust in leadership served as a moderator. An analytical cross-sectional study is performed among rural folks in the Wassa Amenfi Central of Ghana. Using a questionnaire survey, we were able to collect 3079 valid responses. The Smart PLS was used to estimate the relationship among the variables. The results revealed that media attention had a significant influence on vaccine hesitancy. Furthermore, the results showed that fear of COVID-19 played a significant mediating role in the relationship between media and vaccine hesitancy. However, trust in leadership had an insignificant moderating relationship on the fear of COVID-19 and vaccine hesitancy. The study suggests that the health management team can reduce vaccine hesitancy if they focus on lessening the negative impact of media and other antecedents like fear on trust in leadership. [ABSTRACT FROM AUTHOR]                                                                                                                                                                                                                                                                                                                                                                                                                                                                                                                                                                    |

| Year | Author(s)                                                                                                                                                                 | Title                                                                                                          | Journal         | Abstract                                                                                                                                                                                                                                                                                                                                                                                                                                                                                                                                                                                                                                                                                                                                                                                                                                                                                                                                                                                                                                                                                                                                                                                                                                                                                                                                                                                                                                                                                                             |
|------|---------------------------------------------------------------------------------------------------------------------------------------------------------------------------|----------------------------------------------------------------------------------------------------------------|-----------------|----------------------------------------------------------------------------------------------------------------------------------------------------------------------------------------------------------------------------------------------------------------------------------------------------------------------------------------------------------------------------------------------------------------------------------------------------------------------------------------------------------------------------------------------------------------------------------------------------------------------------------------------------------------------------------------------------------------------------------------------------------------------------------------------------------------------------------------------------------------------------------------------------------------------------------------------------------------------------------------------------------------------------------------------------------------------------------------------------------------------------------------------------------------------------------------------------------------------------------------------------------------------------------------------------------------------------------------------------------------------------------------------------------------------------------------------------------------------------------------------------------------------|
| 2021 | M. A. M. Ahmed, R. Colebunders, A. A. Gele, A. A. Farah, S. Osman, I. A. Guled, A. A. M. Abdullahi, A. M. Hussein, A. M. Ali and J. N. S. Fodjo                           | COVID-19 Vaccine Acceptability and Adherence to Preventive Measures in Somalia: Results of an Online Survey    | Vaccines        | Most countries are currently gravitating towards vaccination as mainstay strategy to quell COVID-19 transmission. Between December 2020 and January 2021, we conducted a follow-up online survey in Somalia to monitor adherence to COVID-19 preventive measures, and COVID-19 vaccine acceptability and reasons for vaccine hesitancy. Adherence was measured via a composite adherence score based on four measures (physical distancing, face mask use, hand hygiene, and mouth covering when coughing/sneezing). We analyzed 4543 responses (mean age: 23.5 ± 6.4 years, 62.4% males). The mean adherence score during this survey was lower than the score during a similar survey in April 2020. A total of 76.8% of respondents were willing to receive the COVID-19 vaccine. Flu-like symptoms were more frequently reported in the current survey compared to previous surveys. Multiple logistic regression showed that participants who experienced flu-like symptoms, those in the healthcare sector, and those with higher adherence scores had higher odds for vaccine acceptability while being a female reduced the willingness to be vaccinated. In conclusion, our data suggest that the decreasing adherence to COVID-19 preventive measures may have caused increased flu-like symptoms over time. COVID-19 vaccine acceptance in Somalia is relatively high but could be improved by addressing factors that contribute to vaccine hesitancy.                                                   |
| 2021 | M. G. Salomoni, Z. Di Valerio, E. Gabrielli, M. Montalti, D. Tedesco, F. Guaraldi and D. Gori                                                                             | Hesitant or not hesitant? A systematic review on global covid-19 vaccine acceptance in different populations   | Vaccines        | Vaccination currently appears to be the only strategy to contain the spread of COVID-19. At the same time, vaccine hesitancy (VH) could limit its efficacy and has, therefore, attracted the attention of Public Health Systems. This systematic review aimed at assessing anti-COVID-19 vaccine acceptance rates worldwide and at identifying populations more prone to vaccine hesitancy, for which specific interventions should be planned. PubMed database was searched using a purposely formulated string. One hundred out of the 9243 studies retrieved were considered pertinent and thus included in the analyses. VH rate was analyzed according to patient geographical origin, ethnicity, age, study setting, and method used for data collection; data from specific populations were separately analyzed. Overall, this study demonstrated significant differences in terms of VH in the general population and in the specific subgroups examined according to geographical, demographic factors, as well as associated comorbidities, underlining the need for purposely designed studies in specific populations from the different countries, to design targeted programs aimed at increasing awareness for confidence and complacency toward COVID-19 vaccines. © 2021 by the authors. Licensee MDPI, Basel, Switzerland.                                                                                                                                                                        |
| 2020 | M. Kabamba Nzaji, L. Kabamba Ngombe, G. Ngoie Mwamba, D. B. Banza Ndala, J. Mbidi Miema, C. Luhata Lungoyo, B. Lora Mwimba, A. Cikomola Mwana Bene and E. Mukamba Musenga | Acceptability of Vaccination Against COVID-19 Among Healthcare Workers in the Democratic Republic of the Congo | Pragmat Obs Res | PURPOSE: This study aims to estimate the acceptability of a future vaccine against COVID-19 and associated factors if offered in Congolese health-care workers (HCWs), since they have the highest direct exposure to the disease. PATIENTS AND METHODS: We conducted an analytical cross-sectional study among 23 Congolese referral hospitals, including three university hospitals, located in three towns from March through 30 April 2020. The main outcome variable was healthcare workers' acceptance of a future vaccine against COVID-19. The associated factors of vaccination willingness were identified through a logistic regression analysis. RESULTS: A sample of 613 HCWs participated in the study and completed the study questionnaire, including 312 (50.9%) men and 301 (49.1%) women. Only 27.7% of HCWs said that they would accept a COVID-19 vaccine if it was available. From the logistic regression analysis, male healthcare workers (ORa=1.17, 95% CI: 1.15-2.60), primarily doctors (ORa=1.59; 95% CI:1.03-2.44) and having a positive attitude towards a COVID-19 vaccine (ORa=11.49; 95% CI: 5.88-22.46) were significantly associated with reporting willingness to be vaccinated. CONCLUSION: For acceptability of vaccination against COVID-19 among others education among HCWs is crucial because health professionals' attitudes about vaccines are an important determinant of their own vaccine uptake and their likelihood of recommending the vaccine to their patients. |

| Year | Author(s)                                                                             | Title                                                                                                         | Journal                                | Abstract                                                                                                                                                                                                                                                                                                                                                                                                                                                                                                                                                                                                                                                                                                                                                                                                                                                                                                                                                                                                                                                                                                                                                                                                                                                                                                                                                                                                                                                                                                                                                                                                                                                                                                                                                                     |
|------|---------------------------------------------------------------------------------------|---------------------------------------------------------------------------------------------------------------|----------------------------------------|------------------------------------------------------------------------------------------------------------------------------------------------------------------------------------------------------------------------------------------------------------------------------------------------------------------------------------------------------------------------------------------------------------------------------------------------------------------------------------------------------------------------------------------------------------------------------------------------------------------------------------------------------------------------------------------------------------------------------------------------------------------------------------------------------------------------------------------------------------------------------------------------------------------------------------------------------------------------------------------------------------------------------------------------------------------------------------------------------------------------------------------------------------------------------------------------------------------------------------------------------------------------------------------------------------------------------------------------------------------------------------------------------------------------------------------------------------------------------------------------------------------------------------------------------------------------------------------------------------------------------------------------------------------------------------------------------------------------------------------------------------------------------|
| 2021 | M. Mesesle                                                                            | Awareness and attitude towards covid-19 vaccination and associated factors in ethiopia: Cross-sectional study | Infection and Drug Resistance          | Background: Coronavirus disease (COVID-19) is a deadly virus that continues to afflict many countries worldwide. The development of a COVID-19 vaccine to combat the disease's spread and devastating effects is still ongoing, and as the pandemic progresses, new, more effective vaccines are likely to be created. The aim of this study was to assess awareness and attitude towards COVID-19 vaccination in Ethiopia. Methods: A population-based cross-sectional e-survey was conducted among 425 participants from March 13, 2021 to April 10, 2021. The survey was conducted using a structured and self-reported questionnaire containing informed consent along with three sections (sociodemographic, awareness, and attitude); a multivariable logistic regression model was performed to determine the variables predicting awareness towards COVID-19 vaccinations. Results: The mean score of awareness was 4.3 (SD=1.1) out of 7, with the overall awareness of 40.8%, and the mean score of attitudes was 4.09 (SD=2.16) out of 9, with an overall "positive attitude" score of 24.2%. College and above educational level (AOR=2.21, 95% CI=1.32, 4.62), had access to mass media (AOR=4.75, 95% CI =2.74, 8.24), and urban residency (AOR=2.83, 95% C.I = 1.57, 5.09) were significantly associated with awareness towards COVID-19 vaccination. Conclusion: In Ethiopia, there is a poor knowledge toward COVID-19 vaccines, according to the current report. The findings indicate that authorities should implement an urgent health education program and disseminate more reliable information. Using the media, policymakers should take measures to ensure adequate awareness of COVID-19 vaccinations with various stakeholders. © 2021 Mesesle. |
| 2021 | M. T. J. Ansari and N. A. Khan                                                        | Worldwide COVID-19 vaccines sentiment analysis through twitter content                                        | Electronic Journal of General Medicine | One year during the pandemic of COVID 19, numerous viable possibilities have been created in worldwide efforts to create and disseminate a viable vaccine. The rapid development of numerous vaccinations is remarkable; generally, the procedure takes 8 to 15 years. The vaccination of a critical proportion of the global population, which is vital for containing the pandemic, is now facing a new set of hurdles, including hazardous new strains of the virus, worldwide competition over a shortage of doses, as well as public suspicion about the vaccinations. A safe and efficacious vaccine COVID-19 is borne fruit globally. There are presently more than a dozen vaccinations worldwide authorized; many more continue to be developed. This paper used COVID-19 vaccine related tweets to present an overview of the public's reactions on current vaccination drives by using thematic sentiment and emotional analysis, and demographics interpretation to people. Further, experiments were carried out for sentiment analysis in order to uncover fresh information about the effect of location and gender. Overall Tweets were generally negative in tone and a huge vaccination trend can be seen in global health perspectives, as evidenced by the analysis of the role of comprehensive science and research in vaccination. © 2021 by Author/s and Licensed by Modestum.                                                                                                                                                                                                                                                                                                                                                                       |
| 2021 | Malik Sallam                                                                          | COVID-19 Vaccine Hesitancy Worldwide: A Concise Systematic Review of Vaccine Acceptance Rates                 | Vaccines                               |                                                                                                                                                                                                                                                                                                                                                                                                                                                                                                                                                                                                                                                                                                                                                                                                                                                                                                                                                                                                                                                                                                                                                                                                                                                                                                                                                                                                                                                                                                                                                                                                                                                                                                                                                                              |
| 2021 | Martin Wiredu Agyekum, Grace Frempong Afrifa-Anane, Frank Kyei-Arthur and Bright Addo | Acceptability of COVID-19 vaccination among health care workers in Ghana                                      | Advances in Public Health              |                                                                                                                                                                                                                                                                                                                                                                                                                                                                                                                                                                                                                                                                                                                                                                                                                                                                                                                                                                                                                                                                                                                                                                                                                                                                                                                                                                                                                                                                                                                                                                                                                                                                                                                                                                              |

| Year | Author(s)                                                                                                                                                                                                                         | Title                                                                                                                                               | Journal                   | Abstract                                                                                                                                                                                                                                                                                                                                                                                                                                                                                                                                                                                                                                                                                                                                                                                                                                                                                                                                                                                                                                                                                                                                                                                                                                                                                                                                                                                                                                                                                                                                                                                                                                                                                                                                                                                                                                                                                                                                                                                                                                                                                                                                                                                                                                                                                                                                                                                                                                                                                                                                                                                                                                                                                                     |
|------|-----------------------------------------------------------------------------------------------------------------------------------------------------------------------------------------------------------------------------------|-----------------------------------------------------------------------------------------------------------------------------------------------------|---------------------------|--------------------------------------------------------------------------------------------------------------------------------------------------------------------------------------------------------------------------------------------------------------------------------------------------------------------------------------------------------------------------------------------------------------------------------------------------------------------------------------------------------------------------------------------------------------------------------------------------------------------------------------------------------------------------------------------------------------------------------------------------------------------------------------------------------------------------------------------------------------------------------------------------------------------------------------------------------------------------------------------------------------------------------------------------------------------------------------------------------------------------------------------------------------------------------------------------------------------------------------------------------------------------------------------------------------------------------------------------------------------------------------------------------------------------------------------------------------------------------------------------------------------------------------------------------------------------------------------------------------------------------------------------------------------------------------------------------------------------------------------------------------------------------------------------------------------------------------------------------------------------------------------------------------------------------------------------------------------------------------------------------------------------------------------------------------------------------------------------------------------------------------------------------------------------------------------------------------------------------------------------------------------------------------------------------------------------------------------------------------------------------------------------------------------------------------------------------------------------------------------------------------------------------------------------------------------------------------------------------------------------------------------------------------------------------------------------------------|
| 2022 | Melissa Leach, Hayley MacGregor, Grace Akello, Lawrence Babawo, Moses Baluku, Alice Desclaux, Catherine Grant, Foday Kamara, Marion Nyakoi, Melissa Parker, Paul Richards, Esther Mokuwa, Bob Okello, Kelley Sams and Khoudia Sow | Vaccine anxieties, vaccine preparedness: Perspectives from Africa in a Covid-19 era                                                                 | Social Science & Medicine | Global debates about vaccines as a key element of pandemic response and future preparedness in the era of Covid-19 currently focus on questions of supply, with attention to global injustice in vaccine distribution and African countries as rightful beneficiaries of international de-regulation and financing initiatives such as COVAX. At the same time, vaccine demand and uptake are seen to be threatened by hesitancy, often attributed to an increasingly globalised anti-vaxx movement and its propagation of misinformation and conspiracy, now reaching African populations through a social media 'infodemic'. Underplayed in these debates are the socio-political contexts through which vaccine technologies enter and are interpreted within African settings, and the crucial intersections between supply and demand. We explore these through a 'vaccine anxieties' framework attending to both desires for and worries about vaccines, as shaped by bodily, societal and wider political understandings and experiences. This provides an analytical lens to organise and interpret ethnographic and narrative accounts in local and national settings in Uganda and Sierra Leone, and their (dis)connections with global debates and geopolitics. In considering the socially-embedded reasons why people want or do not want Covid-19 vaccines, and how this intersects with the dynamics of vaccine supply, access and distribution in rapidly-unfolding epidemic situations, we bring new, expanded insights into debates about vaccine confidence and vaccine preparedness. (Copyright © 2022 The Authors. Published by Elsevier Ltd.. All rights reserved.)                                                                                                                                                                                                                                                                                                                                                                                                                                                                                                                                                                                                                                                                                                                                                                                                                                                                                                                                                                                                                    |
| 2022 | Metadel Adane, Ayechech Ademas and Helmut Kloos                                                                                                                                                                                   | Knowledge, attitudes, and perceptions of COVID-19 vaccine and refusal to receive COVID-19 vaccine among healthcare workers in northeastern Ethiopia | BMC Public Health         | <b>Background:</b> Major efforts are being made to control the spread and impacts of the coronavirus pandemic using vaccines. Ethiopia began on March 13, 2021, to vaccinate healthcare workers (HCWs) for COVID-19 with the AstraZeneca vaccine. However, willingness to be vaccinated depends to a large extent on factors beyond the availability of vaccines. This study aimed to determine the rate of intention to refuse COVID-19 vaccination and associated factors among HCWs in northeastern Ethiopia. <b>Method:</b> An institution-based cross-sectional study was employed among 404 HCWs in Dessie City, northeastern Ethiopia in May, 2021. Data were collected, checked, coded, entered into EpiData Version 4.6 and exported to Statistical Package of Social Sciences (SPSS) Version 25.0 for cleaning and analysis. The dependent variable was refuse to receive COVID-19 vaccination and the independent variables included socio-demographic factors, knowledge, attitudes and perceptions. A Binary logistic regression model was used to determine the association between vaccine refusal and the independent variables. From bivariate analysis, variables with p-values < 0.25 were retained for multivariable analysis. From multivariable analysis, variables with adjusted odds ratio (AOR), p-values < 0.05 at 95% confidence interval (CI) were declared as factors significantly associated with refusal to be vaccinated among HCWs in Dessie City, northeastern Ethiopia. <b>Results:</b> The proportion of HCWs with overall good knowledge, good perception, and positive attitudes about COVID-19 vaccination were 62.5%, 60.5%, and 52.3%, respectively; 64.0% of the HCWs wanted to be vaccinated while 36.0% said that they would refuse to do so. Multivariable analysis identified negative attitudes (AOR: 3.057; 95%CI [1.860 - 5.026]) and poor perceptions (AOR: 4.73; 95%CI [2.911 - 7.684]) about COVID-19 vaccines were significantly associated with refusal to be vaccinated for COVID-19. Nearly half (46.9%) of the HCWs stated that vaccines could worsen any pre-existing medical conditions and 39.5% of them thought that vaccines could cause COVID-19 infections. <b>Conclusion:</b> The willingness of HCWs to get vaccinated against COVID-19 was relatively high among HCWs. Negative attitudes and poor perceptions towards the anticipated COVID-19 vaccination were significant factors to refuse to be vaccinated. Our findings may provide information for the management authorities and stakeholders to promote and improve attitudes, knowledge and perceptions towards COVID-19 vaccination uptake among HCWs. [ABSTRACT FROM AUTHOR] |

| Year | Author(s)                                                                                                                                                                                                                                                                                                                                                                                     | Title                                                                                                                  | Journal                       | Abstract                                                                                                                                                                                                                                                                                                                                                                                                                                                                                                                                                                                                                                                                                                                                                                                                                                                                                                                                                                                                                                                                                                                                                                                                                                                                                                                                                                                                                                                                                                                                                                                                                                                                                        |
|------|-----------------------------------------------------------------------------------------------------------------------------------------------------------------------------------------------------------------------------------------------------------------------------------------------------------------------------------------------------------------------------------------------|------------------------------------------------------------------------------------------------------------------------|-------------------------------|-------------------------------------------------------------------------------------------------------------------------------------------------------------------------------------------------------------------------------------------------------------------------------------------------------------------------------------------------------------------------------------------------------------------------------------------------------------------------------------------------------------------------------------------------------------------------------------------------------------------------------------------------------------------------------------------------------------------------------------------------------------------------------------------------------------------------------------------------------------------------------------------------------------------------------------------------------------------------------------------------------------------------------------------------------------------------------------------------------------------------------------------------------------------------------------------------------------------------------------------------------------------------------------------------------------------------------------------------------------------------------------------------------------------------------------------------------------------------------------------------------------------------------------------------------------------------------------------------------------------------------------------------------------------------------------------------|
| 2021 | Mohammed A. M. Ahmed, Robert Colebunders, Abdi A. Gele, Abdiqani A. Farah, Shariff Osman, Ibraahim Abdullahi Guled, Aweis Ahmed Moalim Abdullahi, Ahmed Mohamud Hussein, Abdiaziz Mohamed Ali and Joseph Nelson Siewe Fodjo                                                                                                                                                                   | COVID-19 Vaccine Acceptability and Adherence to Preventive Measures in Somalia: Results of an Online Survey            | Vaccines                      |                                                                                                                                                                                                                                                                                                                                                                                                                                                                                                                                                                                                                                                                                                                                                                                                                                                                                                                                                                                                                                                                                                                                                                                                                                                                                                                                                                                                                                                                                                                                                                                                                                                                                                 |
| 2021 | Nasim Asadi Faezi, Pourya Gholizadeh, Moussa Sanogo, Amadou Oumarou, Maad Nasser Mohamed, Yacouba Cissoko, Mamadou Saliou Sow, Bakary Sayon Keita, Youssouf A. G. Mohamed Baye, Pasquale Pagliano, Patassi Akouda, Sid'Ahmed Soufiane, Akory Ag Iknane, Mamadou Oury Safiatou Diallo, Zakaria Gansane, Barkat Ali Khan, Şükran Köse, Hamid Allahverdi, Khudaverdi Ganvarov and Mariam Soumaré | Peoples' attitude toward COVID-19 vaccine, acceptance, and social trust among African and Middle East countries        | Health Promotion Perspectives | Background: To end the COVID-19 pandemic, a large part of the world must be immune to the virus by vaccination. Therefore, this study aimed to gauge intent to be vaccinated against COVID-19 among ordinary people and to identify attitudes towards vaccines and barriers for vaccine acceptance. Methods: The study population comprises 1880 people residing in different countries that answer a prepared questionnaire. The questionnaire topics are demographics, historical issues, participants' attitudes and beliefs regarding vaccines, concerns, and vaccine hesitancy. Results: Attitudes and beliefs relating to vaccines in general, and the COVID-19 vaccine, were ascertained. Overall, 66.81% of the contributors would like to be vaccinated against COVID-19, while 33.19% did not intend to be vaccinated. Reasons for COVID-19 vaccine hesitancy included concern regarding vaccine side effects, fear of getting sick from the uptake of the vaccine, and the absence of accurate vaccine promotion news. Individuals with higher education believe that India (68.6%) produces the best vaccine ( $P < 0.001$ ), while healthcare workers think the Chinese vaccine (44.2%) is the best ( $P = 0.020$ ). Individuals with higher education have not been vaccinated, not be healthcare workers, and females were the most contributors to effective of the vaccine in reducing mortality from COVID-19 disease. Conclusion: Given the degree of hesitancy against COVID-19 vaccination, a multifaceted approach to facilitate vaccine uptake that includes vaccine education, behavioral change strategies, and health promotion, is paramount. [ABSTRACT FROM AUTHOR] |
| 2021 | O. V. Adeniyi, D. Stead, M. Singata-Madliki, J. Batting, M. Wright, E. Jelliman, S. Abrahams and A. Parrish                                                                                                                                                                                                                                                                                   | Acceptance of covid-19 vaccine among the healthcare workers in the eastern cape, south africa: A cross sectional study | Vaccines                      | Background: This study assesses the perceptions and acceptance of severe acute respiratory syndrome coronavirus-2 (SARS-CoV-2) vaccination. It also examines its influencing factors among the healthcare workers (HCWs) in the Eastern Cape, South Africa. Methods: In this cross-sectional study performed in November and December 2020, a total of 1308 HCWs from two large academic hospitals participated in the Eastern Cape Healthcare Workers Acquisition of SARS-CoV-2 (ECHAS) study. Validated measures of vaccine hesitancy were explored using a questionnaire. Logistic regression was used to identify the determinants of vaccine hesitancy. Results: The majority were nurses (45.2%), and at risk for unfavourable Covid-19 outcome, due to obesity (62.9%) and having direct contact with individuals confirmed to have Covid-19 (77.1%). The overall acceptance of SARS-CoV-2 vaccine was 90.1%, which differed significantly by level of education. Individuals with lower educational attainment (primary and secondary education) and those with prior vaccine refusal were less likely to accept the SARS-CoV-2 vaccine. However, positive perceptions about the SARS-CoV-2 vaccine were independently associated with vaccine acceptance. Conclusions: The high level of acceptance of SARS-CoV-2 vaccine is reassuring; however, HCWs with a lower level of education and those with prior vaccine refusal should be targeted for further engagements to address their concerns and fears. © 2021 by the authors. Licensee MDPI, Basel, Switzerland.                                                                                                                  |

| Year | Author(s)                                                                                                                                                                                                                                                                                                                       | Title                                                                                                                          | Journal               | Abstract                                                                                                                                                                                                                                                                                                                                                                                                                                                                                                                                                                                                                                                                                                                                                                                                                                                                                                                                                                                                                                                                                                                                                                                                                                                                                                                                                                                                                                                                                                                                                                                                                                                                                                                                                                                                                                                                                                                                                                    |
|------|---------------------------------------------------------------------------------------------------------------------------------------------------------------------------------------------------------------------------------------------------------------------------------------------------------------------------------|--------------------------------------------------------------------------------------------------------------------------------|-----------------------|-----------------------------------------------------------------------------------------------------------------------------------------------------------------------------------------------------------------------------------------------------------------------------------------------------------------------------------------------------------------------------------------------------------------------------------------------------------------------------------------------------------------------------------------------------------------------------------------------------------------------------------------------------------------------------------------------------------------------------------------------------------------------------------------------------------------------------------------------------------------------------------------------------------------------------------------------------------------------------------------------------------------------------------------------------------------------------------------------------------------------------------------------------------------------------------------------------------------------------------------------------------------------------------------------------------------------------------------------------------------------------------------------------------------------------------------------------------------------------------------------------------------------------------------------------------------------------------------------------------------------------------------------------------------------------------------------------------------------------------------------------------------------------------------------------------------------------------------------------------------------------------------------------------------------------------------------------------------------------|
| 2021 | Obi Peter Adigwe                                                                                                                                                                                                                                                                                                                | COVID-19 vaccine hesitancy and willingness to pay: Emergent factors from a cross-sectional study in Nigeria                    | Vaccine: X            | Introduction: Prior to the COVID-19 pandemic, it took at least several years to develop vaccines for prevention of infectious diseases. The COVID-19 vaccine is the first to be developed within a period of one year. The expediency associated with the development of the COVID-19 vaccine has however been hampered by vaccine hesitancy and other relevant factors that could influence consequent immunisation. This study aimed at investigating factors associated with vaccine hesitancy and willingness to pay for COVID-19 vaccination.; Methods: A cross-sectional approach was used to undertake online and physical data collection with a validated questionnaire.; Results: A total of 1767 valid responses were received, female participants were in the minority (42.2%), majority (54.9%) of the study participants were between the ages of 18 and 30 years, and more than half (53.8%) of the participants were educated up to first degree level. Slightly above half (52.9%) of the study participants indicated that they were worried about side effects that may be associated with COVID-19 vaccines, and this may likely prevent them from taking the vaccine. A strong majority (85.1%) of the study participants indicated that COVID-19 vaccine should be administered at no cost to citizens. Only a quarter (26%) of the participants were willing to pay a fee for COVID-19 vaccination. Also, older participants and those that had been previously infected with COVID-19 were more likely to pay for COVID-19 vaccination.; Conclusion: This study provides critical insights which could influence immunisation efforts during the pandemic. An early understanding of population perceptions of the COVID-19 vaccine can be invaluable in designing successful campaigns. This is even more critical, given supply limitations, access issues and vaccines' inequity occasioned by the international scramble. (© 2021 The Author.) |
| 2021 | P. C. Addo, N. B. Kulbo, K. A. Sagoe, A. A. Ohemeng and E. Amuzu                                                                                                                                                                                                                                                                | Guarding against COVID-19 vaccine hesitance in Ghana: analytic view of personal health engagement and vaccine related attitude | Hum Vaccin Immunother | Vaccination is the most effective preventive measure against COVID-19 spread. While the WHO and other stakeholders fear vaccine nationalism, vaccine-hesitancy has become a topical issue among experts. Based on the evidence of vaccine hesitancy among Blacks, we explore the interrelatedness of psycho-social factors (personal health engagement, fear of COVID-19, perceived susceptibility, and vaccine-related attitude) likely to thwart vaccine acceptance in Africa. We sampled 1768 Ghanaian adults over 2 weeks from December 14, 2020, the first day a successful COVID-19 vaccine was administered in the US using an online survey. A higher level of personal health engagement was found to promote vaccine-related attitudes while reducing COVID-19 related fears, susceptibility, and vaccine hesitancy. Fear of COVID-19 and perceived vulnerability are significant contributors to the willingness to accept vaccination. This is an indication that health engagement alone will not promote vaccination willingness, but the fear and higher level of perceived susceptibility out of personal evaluation are essential factors in vaccination willingness. We recommend promoting health educational messages on COVID-19 vaccination ahead of any vaccination rollout in Africa, and such messages should contain some element of fear appeal.                                                                                                                                                                                                                                                                                                                                                                                                                                                                                                                                                                                                 |
| 2022 | Patrick D. M. C. Katoto, Saahier Parker, Nancy Coulson, Nirvana Pillay, Sara Cooper, Anelisa Jaca, Edison Mavundza, Gregory Houston, Candice Groenewald, Zaynab Essack, Jane Simmonds, Londiwe Deborah Shandu, Marilyn Couch, Nonkululeko Khuzwayo, Nobukhosi Ncube, Phelele Bhengu, Heidi van Rooyen and Charles Shey Wiysonge | Predictors of COVID-19 Vaccine Hesitancy in South African Local Communities: The VaxScenes Study                               | Vaccines              |                                                                                                                                                                                                                                                                                                                                                                                                                                                                                                                                                                                                                                                                                                                                                                                                                                                                                                                                                                                                                                                                                                                                                                                                                                                                                                                                                                                                                                                                                                                                                                                                                                                                                                                                                                                                                                                                                                                                                                             |

| Year | Author(s)                                                                                                                                                                                                  | Title                                                                                                          | Journal                    | Abstract                                                                                                                                                                                                                                                                                                                                                                                                                                                                                                                                                                                                                                                                                                                                                                                                                                                                                                                                                                                                                                                                                                                                                                                                                                                                                                                                                                                                                                                                                                                                                                                                                                                                                                                                                                                                                                                                                                                                                                                                                                                                                                                                                                                                                                                                                                                                                                                                                                                                                                                                                                                                         |
|------|------------------------------------------------------------------------------------------------------------------------------------------------------------------------------------------------------------|----------------------------------------------------------------------------------------------------------------|----------------------------|------------------------------------------------------------------------------------------------------------------------------------------------------------------------------------------------------------------------------------------------------------------------------------------------------------------------------------------------------------------------------------------------------------------------------------------------------------------------------------------------------------------------------------------------------------------------------------------------------------------------------------------------------------------------------------------------------------------------------------------------------------------------------------------------------------------------------------------------------------------------------------------------------------------------------------------------------------------------------------------------------------------------------------------------------------------------------------------------------------------------------------------------------------------------------------------------------------------------------------------------------------------------------------------------------------------------------------------------------------------------------------------------------------------------------------------------------------------------------------------------------------------------------------------------------------------------------------------------------------------------------------------------------------------------------------------------------------------------------------------------------------------------------------------------------------------------------------------------------------------------------------------------------------------------------------------------------------------------------------------------------------------------------------------------------------------------------------------------------------------------------------------------------------------------------------------------------------------------------------------------------------------------------------------------------------------------------------------------------------------------------------------------------------------------------------------------------------------------------------------------------------------------------------------------------------------------------------------------------------------|
| 2021 | Rihanna Mohammed, Teklehaimanot Mezgebe Nguse, Bruck Messele Habte, Atalay Mulu Fentie and Gebremedhin Beedemariam Gebretekle                                                                              | COVID-19 vaccine hesitancy among Ethiopian healthcare workers                                                  | PLoS ONE                   | <p>Introduction: COVID-19 poses significant health and economic threat prompting international firms to rapidly develop vaccines and secure quick regulatory approval. Although COVID-19 vaccination priority is given for high-risk individuals including healthcare workers (HCWs), the success of the immunization efforts hinges on peoples' willingness to embrace these vaccines. Objective: This study aimed to assess HCWs intention to be vaccinated against COVID-19 and the reasons underlying vaccine hesitancy. Methods: A cross-sectional survey was conducted among HCWs in Addis Ababa, Ethiopia from March to July 2021. Data were collected from eligible participants from 18 health facilities using a pre-tested semi-structured questionnaire. Data were summarized using descriptive statistics and multivariable logistic regression was performed to explore factors associated with COVID-19 vaccine hesitancy. A <math>p &lt; 0.05</math> was considered statistically significant. Results: A total of 614 HCWs participated in the study, with a mean age of <math>30.57 \pm 6.87</math> years. Nearly two-thirds (60.3%) of HCWs were hesitant to use the COVID-19 vaccine. Participants under the age of 30 years were approximately five times more likely to be hesitant to be vaccinated compared to those over the age of 40 years. HCWs other than medical doctors and/or nurses (AOR = 2.1; 95%CI; 1.1, 3.8) were more likely to be hesitant for COVID-19 vaccine. Lack of believe in COVID-19 vaccine benefits (AOR = 2.5; 95%CI; 1.3, 4.6), lack of trust in the government (AOR = 1.9; 95%CI; 1.3, 3.1), lack of trust science to produce safe and effective vaccines (AOR = 2.6; 95%CI; 1.6, 4.2); and concern about vaccine safety (AOR = 3.2; 95%CI; 1.9, 5.4) were also found to be predictors of COVID-19 vaccine hesitancy. Conclusion: COVID-19 vaccine hesitancy showed to be high among HCWs. All concerned bodies including the ministry, regional health authorities, health institutions, and HCWs themselves should work together to increase COVID-19 vaccine uptake and overcome the pandemic. [ABSTRACT FROM AUTHOR]</p>                                                                                                                                                                                                                                                                                                                                                                                                                                 |
| 2021 | Robert Kaba Alhassan, Matilda Aberese-Ako, Phidelia Theresa Doegah, Mustapha Immurana, Maxwel Ayindenaba Dalaba, Alfred Kwesi Manyeh, Desmond Klu, Evelyn Acquah, Evelyn Korkor Ansah and Margaret Gyapong | COVID-19 vaccine hesitancy among the adult population in Ghana: evidence from a pre-vaccination rollout survey | Tropical Medicine & Health | <p>Background: Coronavirus disease 2019 (COVID-19) has already claimed over four million lives globally and over 800 deaths in Ghana. The COVID-19 vaccine is a key intervention towards containing the pandemic. Over three billion doses of the vaccine have already been administered globally and over 800,000 doses administered in Ghana, representing less than 5% vaccination coverage. Fear, uncertainty, conspiracy theories and safety concerns remain important threats to, a successful rollout of the vaccine if not managed well. Objective: Ascertain the predictors of citizens' probability of participating in a COVID-19 vaccine trial and subsequently accept the vaccine when given the opportunity. Methodology: The study was an online nation-wide survey among community members (n = 1556) from 18th September to 23rd October, 2020 in the 16 regions in Ghana. Binary probit regression analysis with marginal effect estimations was employed to ascertain the predictors of community members' willingness to participate in a COVID-19 vaccine trial and uptake the vaccine. Results: Approximately 60% of respondents said they will not participate in a COVID-19 vaccine trial; 65% will take the vaccine, while 69% will recommend it to others. Willingness to voluntarily participate in COVID-19 vaccine trial, uptake the vaccine and advise others to do same was higher among adults aged 18–48 years, the unmarried and males (<math>p &lt; 0.05</math>). Significant predictors of unwillingness to participate in the COVID-19 vaccine trial and uptake of the vaccine are: married persons, females, Muslims, older persons, residents of less urbanised regions and persons with lower or no formal education (<math>p &lt; 0.05</math>). Predominant reasons cited for unwillingness to participate in a COVID-19 vaccine trial and take the vaccine included fear, safety concerns, lack of trust in state institutions, uncertainty, political connotations, spiritual and religious beliefs. Conclusion: The probability of accepting COVID-19 vaccine among the adult population in Ghana is high but the country should not get complacent because fear, safety and mistrust are important concerns that have the potential to entrench vaccine hesitancy. COVID-19 vaccine rollout campaigns should be targeted and cognisant of the key predictors of citizens' perceptions of the vaccine. These lessons when considered will promote Ghana's efforts towards vaccinating at least 20 million people to attain herd immunity. [ABSTRACT FROM AUTHOR]</p> |



| Year | Author(s)                                                                                                                          | Title                                                                                                                                          | Journal           | Abstract                                                                                                                                                                                                                                                                                                                                                                                                                                                                                                                                                                                                                                                                                                                                                                                                                                                                                                                                                                                                                                                                                                                                                                                                                                                                                                                                                                                                                                                                                                                                                                                                                                                                                                                                                                                                                                                                                                                                                                                                                                                                                                                                                                                                                                                                                                                                                                                                                         |
|------|------------------------------------------------------------------------------------------------------------------------------------|------------------------------------------------------------------------------------------------------------------------------------------------|-------------------|----------------------------------------------------------------------------------------------------------------------------------------------------------------------------------------------------------------------------------------------------------------------------------------------------------------------------------------------------------------------------------------------------------------------------------------------------------------------------------------------------------------------------------------------------------------------------------------------------------------------------------------------------------------------------------------------------------------------------------------------------------------------------------------------------------------------------------------------------------------------------------------------------------------------------------------------------------------------------------------------------------------------------------------------------------------------------------------------------------------------------------------------------------------------------------------------------------------------------------------------------------------------------------------------------------------------------------------------------------------------------------------------------------------------------------------------------------------------------------------------------------------------------------------------------------------------------------------------------------------------------------------------------------------------------------------------------------------------------------------------------------------------------------------------------------------------------------------------------------------------------------------------------------------------------------------------------------------------------------------------------------------------------------------------------------------------------------------------------------------------------------------------------------------------------------------------------------------------------------------------------------------------------------------------------------------------------------------------------------------------------------------------------------------------------------|
| 2022 | Ronelle Burger, Timothy Köhler, Aleksandra M. Golos, Alison M. Buttenheim, René English, Michele Tameris and Brendan Maughan-Brown | Longitudinal changes in COVID-19 vaccination intent among South African adults: evidence from the NIDS-CRAM panel survey, February to May 2021 | BMC Public Health | <p>Background: COVID-19 vaccine hesitancy has threatened the ability of many countries worldwide to contain the pandemic. Given the severe impact of the pandemic in South Africa and disruptions to the roll-out of the vaccine in early 2021, slower-than-expected uptake is a pressing public health challenge in the country. We examined longitudinal changes in COVID-19 vaccination intent among South African adults, as well as determinants of intent to receive a vaccine. Methods: We used longitudinal data from Wave 4 (February/March 2021) and Wave 5 (April/May 2021) of the National Income Dynamics Study: Coronavirus Rapid Mobile Survey (NIDS-CRAM), a national and broadly representative panel survey of adults in South Africa. We conducted cross-sectional analyses on aggregate and between-group variation in vaccination intent, examined individual-level changes between waves, and modeled demographic predictors of intent. Results: We analysed data for 5629 (Wave 4; 48% male, mean age 41.5 years) and 5862 (Wave 5; 48% male, mean age 41.6 years) respondents. Willingness to get a COVID-19 vaccine significantly increased from 70.8% (95% CI: 68.5–73.1) in Wave 4 to 76.1% (95% CI: 74.2–77.8) in Wave 5. Individual-level analyses indicated that only 6.6% of respondents remained strongly hesitant between survey waves. Although respondents aged 18–24 years were 8.5 percentage points more likely to report hesitancy, hesitant respondents in this group were 5.6 percentage points more likely to change their minds by Wave 5. Concerns about rushed testing and safety of the vaccines were frequent and strongly-held reasons for hesitancy. Conclusions: Willingness to receive a COVID-19 vaccine has increased among adults in South Africa, and those who were entrenched in their reluctance make up a small proportion of the country's population. Younger adults, those in formal housing, and those who trusted COVID-19 information on social media were more likely to be hesitant. Given that stated vaccination intent may not translate into behaviour, our finding that three-quarters of the population were willing to accept the vaccine may reflect an upper bound. Vaccination promotion campaigns should continue to frame vaccine acceptance as the norm and tailor strategies to different demographic groups.</p> <p>[ABSTRACT FROM AUTHOR]</p> |



1  
2  
3  
4  
5  
6  
7  
8  
9  
10  
11  
12  
13  
14  
15  
16  
17  
18  
19  
20  
21  
22  
23  
24  
25  
26  
27  
28  
29  
30  
31  
32  
33  
34  
35  
36  
37  
38  
39  
40  
41  
42  
43  
44  
45  
46

For peer review only

| Year | Author(s)                                                                                                                                                                                                       | Title                                                                                                         | Journal  | Abstract                                                                                                                                                                                                                                                                                                                                                                                                                                                                                                                                                                                                                                                                                                                                                                                                                                                                                                                                                                                                                                                                                                                                                                                                                                                                                                                                                                                                                                                                                                                                                                                                                                                                                                                                                                                                                                                                                                                                                                                                                                                                                                                                                                                                                                                                                                                                                                                                                                                                                                                                                                                                                                                                                             |
|------|-----------------------------------------------------------------------------------------------------------------------------------------------------------------------------------------------------------------|---------------------------------------------------------------------------------------------------------------|----------|------------------------------------------------------------------------------------------------------------------------------------------------------------------------------------------------------------------------------------------------------------------------------------------------------------------------------------------------------------------------------------------------------------------------------------------------------------------------------------------------------------------------------------------------------------------------------------------------------------------------------------------------------------------------------------------------------------------------------------------------------------------------------------------------------------------------------------------------------------------------------------------------------------------------------------------------------------------------------------------------------------------------------------------------------------------------------------------------------------------------------------------------------------------------------------------------------------------------------------------------------------------------------------------------------------------------------------------------------------------------------------------------------------------------------------------------------------------------------------------------------------------------------------------------------------------------------------------------------------------------------------------------------------------------------------------------------------------------------------------------------------------------------------------------------------------------------------------------------------------------------------------------------------------------------------------------------------------------------------------------------------------------------------------------------------------------------------------------------------------------------------------------------------------------------------------------------------------------------------------------------------------------------------------------------------------------------------------------------------------------------------------------------------------------------------------------------------------------------------------------------------------------------------------------------------------------------------------------------------------------------------------------------------------------------------------------------|
| 2021 | S. A. Bono, E. Faria de Moura Villela, C. S. Siau, W. S. Chen, S. Pengpid, M. T. Hasan, P. Sessou, J. D. Ditekemena, B. O. Amodan, M. C. Hosseinipour, H. Dolo, J. N. Siewe Fodjo, W. Y. Low and R. Colebunders | Factors Affecting COVID-19 Vaccine Acceptance: An International Survey among Low- and Middle-Income Countries | Vaccines | <p>All countries had lower odds for COVID-19 vaccine acceptability compared to Brazil at 90% effectiveness. However, at 95% effectiveness, Thailand (aOR: 1.54, 95% CI [1.14, 2.10], p = 0.006) and Bangladesh (aOR: 1.43, 95% CI [1.08, 1.90], p = 0.012) had higher odds for vaccine acceptability. Compared to participants aged 60 years and above, those in the age groups of 18–29 years and 30–39 years had higher odds of vaccine acceptance at both effectiveness levels, especially among 18- to 29-year-olds at the 95% effectiveness level (aOR: 1.62, 95% CI [1.14, 2.28], p = 0.007). Females had lower odds of willingness to be vaccinated at the 95% effectiveness level (aOR: 0.75, 95% CI [0.65, 0.88], p &lt; 0.001). In terms of income, those with lower-middle (aOR: 1.23, 95% CI [1.01, 1.49], p &lt; 0.001, higher-middle (aOR: 1.75, 95% CI [1.42, 2.16], p &lt; 0.001), and high income (aOR: 1.90, 95% CI [1.32, 2.73], p &lt; 0.001) had higher odds of willingness to be vaccinated compared to those with low income at the 90% effectiveness level.</p> <p>In terms of education and knowledge, participants from undergraduate and postgraduate levels had higher odds for willingness to be vaccinated compared to those who had completed primary and secondary education, particularly among undergraduate degree holders at the 95% effectiveness level (aOR: 1.50, 95% CI [1.19, 1.89], p = 0.001). Those who scored higher in COVID-19 knowledge had consistently higher odds of willingness to be vaccinated, particularly at the 95% effectiveness level (aOR: 2.13, 95% CI [1.96, 2.31], p &lt; 0.001).</p> <p>In terms of health status, participants who had tested negative for COVID-19 had higher odds of willingness to be vaccinated both at the 90% effectiveness level (aOR: 1.35, 95% CI [1.19, 1.53], p &lt; 0.001) and at the 95% effectiveness level (aOR: 1.37, 95% CI [1.15, 1.63], p &lt; 0.001). The presence of at least one underlying chronic disease predicted lower odds for willingness to be vaccinated (aOR: 0.81, 95% CI [0.71, 0.92], p = 0.001) at the 90% effectiveness level. Participants who gave a higher rating to the importance of taking the vaccine to protect themselves had higher odds of taking the vaccine at both levels of effectiveness, particularly at the 95% effectiveness level (aOR: 2.49, 95% CI [2.34, 2.66], p &lt; 0.001). Increased levels of fear/worry about being infected with COVID-19 consistently predicted higher odds of willingness to take the vaccine at 90% (aOR: 1.32, 95% CI [1.25, 1.38], p &lt; 0.001) and 95% effectiveness (aOR: 1.30, 95% CI [1.20, 1.40], p &lt; 0.001).</p> |
| 2021 | S. Handebo, M. Wolde, K. Shitu and A. Kassie                                                                                                                                                                    | Determinant of intention to receive COVID-19 vaccine among school teachers in Gondar City, Northwest Ethiopia | PLoS One | <p>BACKGROUND: Scientists across the world are working on innovating a successful vaccine that will save lives and end COVID-19 pandemic. World Health Organization (WHO) is working to make sure COVID-19 vaccines can be safely delivered to all those who need them. Indeed, the successful deployment and a sufficient uptake of vaccines is equally important. Acceptance and accessibility of such vaccine is a key indicator of vaccination coverage.</p> <p>OBJECTIVE: This study aimed to assess the determinants of intention to receive COVID-19 vaccine among school teachers in Gondar City. METHODS: An institution based cross-sectional study was conducted from December, 2020 to January, 2021. A total of 301 school teachers selected using stratified simple random sampling were included. Descriptive analysis such as medians, means, proportions, standard deviations and frequencies were computed. Linear regression analysis was done to identify factors associated with intention to receive COVID-19 vaccine. A p-value of less than 0.05 was used to declare statistical significance. RESULTS: The median intention to receive COVID-19 vaccine was 3.33 with interquartile range of 2.67-4.0. Of the participants 54.8% had scored above the median of intention to receive COVID-19 vaccine score. 54% variance in intention to receive COVID-19 vaccine was explained by the independent variables. Being affiliated with other category of religion, bachelor degree educational status, perceived susceptibility, perceived benefit, perceived barrier, and cues to action were significantly associated with the intention to receive COVID-19 vaccine. CONCLUSION: The median score of intention to receive COVID-19 vaccine was 3.33. Socio-demographic and health beliefs influenced the intention to receive the COVID-19 vaccine in the study participant. Policy makers and stakeholders should focus on strong health promotion about risks of the pandemic, benefit, safety, and efficacy of vaccination.</p>                                                                                                                                                                                                                                                                                                                                                                                                                                                                                                                                                                                                                                         |

| Year | Author(s)                                                                                                                          | Title                                                                                           | Journal  | Abstract                                                                                                                                                                                                                                                                                                                                                                                                                                                                                                                                                                                                                                                                                                                                                                                                                                                                                                                                                                                                                                                                                                                                                                                                                                                                                                                                             |
|------|------------------------------------------------------------------------------------------------------------------------------------|-------------------------------------------------------------------------------------------------|----------|------------------------------------------------------------------------------------------------------------------------------------------------------------------------------------------------------------------------------------------------------------------------------------------------------------------------------------------------------------------------------------------------------------------------------------------------------------------------------------------------------------------------------------------------------------------------------------------------------------------------------------------------------------------------------------------------------------------------------------------------------------------------------------------------------------------------------------------------------------------------------------------------------------------------------------------------------------------------------------------------------------------------------------------------------------------------------------------------------------------------------------------------------------------------------------------------------------------------------------------------------------------------------------------------------------------------------------------------------|
| 2021 | Shelton Kanyanda, Yannick Markhof, Philip Wollburg and Alberto Zezza                                                               | Acceptance of COVID-19 vaccines in sub-Saharan Africa: evidence from six national phone surveys | BMJ open |                                                                                                                                                                                                                                                                                                                                                                                                                                                                                                                                                                                                                                                                                                                                                                                                                                                                                                                                                                                                                                                                                                                                                                                                                                                                                                                                                      |
| 2021 | Sohail Agha, Adaobi Chine, Mathias Lalika, Samikshya Pandey, Aparna Seth, Alison Wiyeh, Alyssa Seng, Nandan Rao and Akhtar Badshah | Drivers of COVID-19 Vaccine Uptake amongst Healthcare Workers (HCWs) in Nigeria                 | Vaccines | This study applied a behavioral lens to understand drivers of COVID-19 vaccination uptake among healthcare workers (HCWs) in Nigeria. The study used data from an online survey of Nigerian HCWs ages 18 and older conducted in July 2021. Multivariate logistic regression analyses were conducted to examine predictors of getting two doses of a COVID-19 vaccine. One-third of HCWs in our sample reported that they had gotten two doses of a COVID-19 vaccine. Motivation and ability were powerful predictors of being fully vaccinated: HCWs with high motivation and high ability had a 15-times higher odds ratio of being fully vaccinated. However, only 27% of HCWs had high motivation and high ability. This was primarily because the ability to get vaccinated was quite low among HCWs: Only 32% of HCWs reported that it was very easy to get a COVID-19 vaccination. By comparison, motivation was relatively high: 69% of HCWs reported that a COVID-19 vaccine was very important for their health. Much of the recent literature coming out of Nigeria and other LMICs focuses on increasing motivation to get a COVID-19 vaccination. Our findings highlight the urgency of making it easier for HCWs to get COVID-19 vaccinations.                                                                                          |
| 2021 | Stacey Orangi, Jessie Pinchoff, Daniel Mwanga, Timothy Abuya, Mainga Hamaluba, George Warimwe, Karen Austrian and Edwine Barasa    | Assessing the Level and Determinants of COVID-19 Vaccine Confidence in Kenya                    | Vaccines | The government of Kenya has launched a phased rollout of COVID-19 vaccination. A major barrier is vaccine hesitancy; the refusal or delay of accepting vaccination. This study evaluated the level and determinants of vaccine hesitancy in Kenya. We conducted a cross-sectional study administered through a phone-based survey in February 2021 in four counties of Kenya. Multilevel logistic regression was used to identify individual perceived risks and influences, context-specific factors and vaccine-specific issues associated with COVID-19 vaccine hesitancy. COVID-19 vaccine hesitancy in Kenya was high: 36.5%. Factors associated with vaccine hesitancy included: Rural regions, perceived difficulty in adhering to government regulations on COVID-19 prevention, no perceived COVID-19 infection risk, concerns regarding vaccine safety and effectiveness, and religious and cultural reasons. There is a need for the prioritization of interventions to address vaccine hesitancy and improve vaccine confidence as part of the vaccine roll-out plan. These messaging and/or interventions should be holistic to include the value of other public health measures, be focused and targeted to specific groups, raise awareness on the risks of COVID-19 and effectively communicate the benefits and risks of vaccines. |

1  
2  
3  
4  
5  
6  
7  
8  
9  
10  
11  
12  
13  
14  
15  
16  
17  
18  
19  
20  
21  
22  
23  
24  
25  
26  
27  
28  
29  
30  
31  
32  
33  
34  
35  
36  
37  
38  
39  
40  
41  
42  
43  
44  
45  
46

For peer review only

| Year | Author(s)                                                                                                      | Title                                                                                                                                         | Journal          | Abstract                                                                                                                                                                                                                                                                                                                                                                                                                                                                                                                                                                                                                                                                                                                                                                                                                                                                                                                                                                                                                                                                                                                                                                                                                                                                                                                                                                                                                                                                                                                                                                                                                                                                                                                                                                                                                                                                                                                                                                                                                                                                                                                                                                                                                                                       |
|------|----------------------------------------------------------------------------------------------------------------|-----------------------------------------------------------------------------------------------------------------------------------------------|------------------|----------------------------------------------------------------------------------------------------------------------------------------------------------------------------------------------------------------------------------------------------------------------------------------------------------------------------------------------------------------------------------------------------------------------------------------------------------------------------------------------------------------------------------------------------------------------------------------------------------------------------------------------------------------------------------------------------------------------------------------------------------------------------------------------------------------------------------------------------------------------------------------------------------------------------------------------------------------------------------------------------------------------------------------------------------------------------------------------------------------------------------------------------------------------------------------------------------------------------------------------------------------------------------------------------------------------------------------------------------------------------------------------------------------------------------------------------------------------------------------------------------------------------------------------------------------------------------------------------------------------------------------------------------------------------------------------------------------------------------------------------------------------------------------------------------------------------------------------------------------------------------------------------------------------------------------------------------------------------------------------------------------------------------------------------------------------------------------------------------------------------------------------------------------------------------------------------------------------------------------------------------------|
| 2022 | T. P. Davis, Jr., A. K. Yimam, M. A. Kalam, A. D. Tolossa, R. Kanwagi, S. Bauler, L. Kulathungam and H. Larson | Behavioural Determinants of COVID-19-Vaccine Acceptance in Rural Areas of Six Lower- and Middle-Income Countries                              | Vaccines (Basel) | Delayed acceptance or refusal of COVID-19 vaccines may increase and prolong the threat to global public health and the economy. Identifying behavioural determinants is considered a critical step in explaining and addressing the barriers of vaccine refusal. This study aimed to identify the behavioural determinants of COVID-19-vaccine acceptance and provide recommendations to design actionable interventions to increase uptake of the COVID-19 vaccine in six lower- and middle-income countries. Taking into consideration the health belief model and the theory of reasoned action, a barrier analysis approach was employed to examine twelve potential behavioural determinants of vaccine acceptance in Bangladesh, India, Myanmar, Kenya, the Democratic Republic of the Congo (DRC), and Tanzania. In all six countries, at least 45 interviews with those who intended to get the vaccine ("Acceptors") and another 45 or more interviews with those who did not ("Non-acceptors") were conducted, totalling 542 interviews. Data analysis was performed to find statistically significant ( $p < 0.05$ ) differences between Acceptors and Non-acceptors of COVID-19 vaccines and to identify which beliefs were most highly associated with acceptance and non-acceptance of vaccination based on the estimated relative risk. The analysis showed that perceived social norms, perceived positive and negative consequences, perceived risk, perceived severity, trust, perceived safety, and expected access to COVID-19 vaccines had the highest associations with COVID-19-vaccine acceptance in Bangladesh, Kenya, Tanzania, and the DRC. Additional behavioural determinants found to be significant in Myanmar and India were perceived self-efficacy, trust in COVID-19 information provided by leaders, perceived divine will, and perceived action efficacy of the COVID-19 vaccines. Many of the determinants were found to be significant, and their level of significance varied from country to country. National and local plans should include messages and activities that address the behavioural determinants found in this study to significantly increase the uptake of COVID-19 vaccines across these countries. |
| 2021 | Theophilus Acheampong, Eli A. Akorsikumah, John Osae-Kwapong, Musah Khalid, Alfred Appiah and John H. Amuasi   | Examining Vaccine Hesitancy in Sub-Saharan Africa: A Survey of the Knowledge and Attitudes among Adults to Receive COVID-19 Vaccines in Ghana | Vaccines         | The impact of COVID-19 vaccination programmes on disease transmission, morbidity and mortality relies heavily on the population's willingness to accept the vaccine. We explore Ghanaian adult citizens' vaccine hesitancy attitudes and identify the likelihood of participation or non-participation in the government's effort to get citizens vaccinated. A fully anonymised cross-sectional online survey of 2345 adult Ghanaians was conducted from 23 to 28 February 2021. Differences in intentions regarding COVID-19 vaccination were explored using Pearson Chi-square tests. Additionally, multinomial logistic regression was used to analyse the factors associated with willingness to receive vaccines. Responses were weighted using the iterative proportional fitting technique to generate a representative sample. About half (51%) of mostly urban adult Ghanaians over 15 years are likely to take the COVID-19 vaccine if made generally available. Almost a fifth (21%) of the respondents were unlikely to take the vaccine, while another 28% were undecided. Additionally, we find differences in vaccine hesitancy among some socio-demographic characteristics such as age, gender, and primary sources of information. Attaining the proverbial 63% to 70% herd immunity threshold in Ghana is only possible if the preventive vaccination programmes are combined with an enhanced and coordinated public education campaign. Such a campaign should focus on promoting the individual and population-level benefits of vaccination and pre-emptive efforts towards addressing misinformation about vaccines.                                                                                                                                                                                                                                                                                                                                                                                                                                                                                                                                                                                                                  |

| Year | Author(s)                                                         | Title                                                                                                                                           | Journal       | Abstract                                                                                                                                                                                                                                                                                                                                                                                                                                                                                                                                                                                                                                                                                                                                                                                                                                                                                                                                                                                                                                                                                                                                                                                                                                                                                                                                                                                                                                                                                                                                                                                                                                                                                                                                                                                                                                                                                                            |
|------|-------------------------------------------------------------------|-------------------------------------------------------------------------------------------------------------------------------------------------|---------------|---------------------------------------------------------------------------------------------------------------------------------------------------------------------------------------------------------------------------------------------------------------------------------------------------------------------------------------------------------------------------------------------------------------------------------------------------------------------------------------------------------------------------------------------------------------------------------------------------------------------------------------------------------------------------------------------------------------------------------------------------------------------------------------------------------------------------------------------------------------------------------------------------------------------------------------------------------------------------------------------------------------------------------------------------------------------------------------------------------------------------------------------------------------------------------------------------------------------------------------------------------------------------------------------------------------------------------------------------------------------------------------------------------------------------------------------------------------------------------------------------------------------------------------------------------------------------------------------------------------------------------------------------------------------------------------------------------------------------------------------------------------------------------------------------------------------------------------------------------------------------------------------------------------------|
| 2021 | U. G. Okafor, A. Isah, J. C. Onuh, C. B. Mgbemena and C. M. Ubaka | Community acceptance and willingness to pay for hypothetical COVID-19 vaccines in a developing country: a web-based nationwide study in Nigeria | Pan Afr Med J | <p>INTRODUCTION: some promising COVID-19 vaccines are soon to be available but getting the African community to accept them may be challenging. This study assessed the acceptability and willingness to pay (WTP) for hypothetical COVID-19 vaccines among Nigerians. METHODS: a cross-sectional, web-based study was conducted among the Nigerian populace. A 20-item questionnaire was used to collect responses through Google form which was shared to consenting participants through two social media platforms. Multivariate logistic regression was used to determine the sociodemographic factors that were predictive of respondents' willingness to accept the COVID-19 vaccines. Statistical significance was set at <math>p &lt; 0.05</math>. RESULTS: six hundred and eighty-nine respondents completed the survey, with 50.5% being females. Exactly 43.3% of respondents reported that they would accept a hypothetical vaccine if it is currently available, 62.1% said they would accept it in the future while 71.1% agreed to accept it if recommended by healthcare providers. A third (31.9%) of respondents accepted the vaccine for their self-protection and half of those not accepting it (51.3%) said they did not want to "be used as an experiment". Respondents who were of oldest ages (aOR=0.330, 95% CI: 0.141-0.767, <math>p=0.010</math>), of Christian religion (aOR=3.251, 95% CI: 1.301-8.093, <math>p=0.011</math>), and aware of a possible vaccine being made available (aOR=0.636, 95% CI: 0.440-0.920) were significantly more unwilling to accept the vaccine. The median range of WTP was US\$1.2-2.5.</p> <p>CONCLUSION: there is a low acceptance in Nigeria for a COVID-19 vaccine if it was available now, but much higher if it is recommended by a healthcare provider. A high proportion of willing respondents indicated a positive WTP for the vaccine.</p> |

1  
2  
3  
4  
5  
6  
7  
8  
9  
10  
11  
12  
13  
14  
15  
16  
17  
18  
19  
20  
21  
22  
23  
24  
25  
26  
27  
28  
29  
30  
31  
32  
33  
34  
35  
36  
37  
38  
39  
40  
41  
42  
43  
44  
45  
46

| Year | Author(s)                                                                                                                                                                                   | Title                                                      | Journal | Abstract                                                                                                                                                                                                                                                                                                                                                                                                                                                                                                                                                                                                                                                                                                                                                                                                                                                                                                                                                                                                                                                                                                                                                                                                                                                                                                                                                                                                                                                                                                                                                                                                                                                                                                                                                                                                                                                                                                                                                                                                                                                                                                                                                                                                                                                                                                                                                                                                                                                                                                                                                                                                                                                                                                                                                                                                                                                                                                                                                                                                                                                                                                                                                                                                         |
|------|---------------------------------------------------------------------------------------------------------------------------------------------------------------------------------------------|------------------------------------------------------------|---------|------------------------------------------------------------------------------------------------------------------------------------------------------------------------------------------------------------------------------------------------------------------------------------------------------------------------------------------------------------------------------------------------------------------------------------------------------------------------------------------------------------------------------------------------------------------------------------------------------------------------------------------------------------------------------------------------------------------------------------------------------------------------------------------------------------------------------------------------------------------------------------------------------------------------------------------------------------------------------------------------------------------------------------------------------------------------------------------------------------------------------------------------------------------------------------------------------------------------------------------------------------------------------------------------------------------------------------------------------------------------------------------------------------------------------------------------------------------------------------------------------------------------------------------------------------------------------------------------------------------------------------------------------------------------------------------------------------------------------------------------------------------------------------------------------------------------------------------------------------------------------------------------------------------------------------------------------------------------------------------------------------------------------------------------------------------------------------------------------------------------------------------------------------------------------------------------------------------------------------------------------------------------------------------------------------------------------------------------------------------------------------------------------------------------------------------------------------------------------------------------------------------------------------------------------------------------------------------------------------------------------------------------------------------------------------------------------------------------------------------------------------------------------------------------------------------------------------------------------------------------------------------------------------------------------------------------------------------------------------------------------------------------------------------------------------------------------------------------------------------------------------------------------------------------------------------------------------------|
| 2021 | Ugochukwu A. Eze, Kingsley I. Ndoh, Babalola A. Ibisola, Chinemerem D. Onwuliri, Adenekan Osiyemi, Nnamdi Ude, Amalachukwu A. Chime, Eric O. Ogbor, Adegboyega O. Alao and Ashiru Abdullahi | Determinants for Acceptance of COVID-19 Vaccine in Nigeria | Cureus  | <p>Background: The coronavirus disease 2019 (COVID-19) pandemic heralded an unprecedented race to the development of several vaccine candidates at record speeds never seen in global health. Within nine months, Pfizer-BioNTech's COVID-19 vaccine was approved by the United States FDA. Unfortunately, while these advances were ongoing, there was a burgeoning epidemic of disinformation about the virus and the vaccines that affected the willingness of people, especially minority groups, to get vaccinated. In Nigeria, this wave of vaccine hesitancy was happening against the backdrop of landmark pharmaceutical litigations such as the 2007 Pfizer trovafloxacin lawsuit in the country.; Aim: To assess the determinants of the COVID-19 vaccine's acceptability among Nigerians.; Materials and Methods: Following ethical approval, a population-based cross-sectional study was conducted from November 2020 to January 2021 using an adapted pretested, self-administered questionnaire originally designed by Aryn Malik and colleagues who conducted a similar study at Yale University School of Public Health. The participants were recruited through simple random sampling using a list of community and corporate sites obtained from Google Maps in the three regional zones of Nigeria (north, east, and west) in diverse occupational and residential settings. Information obtained includes socio-demographics, medical history related to COVID-19, level of knowledge, risk perception, and attitudes toward COVID-19 and the vaccines. Descriptive and inferential statistics were done, and results were summarized into percentages and associations. The level of statistical significance was set at a p-value of &lt;0.05. Using the open EpiR package (Emory), we determined a minimum of 340 participants for a statistical power of 80%.; Results: A total of 358 responses were obtained out of the 120 questionnaires distributed in each of the three regions, of which 189 (53%) were females. The mean age of respondents was 32 years (<math>\pm 11.2</math> SD). About 75% of the participants had at least a college education. The majority (66.2%) of the participants were willing to accept the approved vaccine. The mean risk perception score for COVID-19 was 5.1 (<math>\pm 2.2</math> SD) out of 10, while the mean COVID-19 symptom knowledge score was 8.6 (<math>\pm 4.1</math> SD) out of 19. Variables such as being male, identifying as Christian, Hausa ethnicity, and living in northern Nigeria had a statistically significant relationship with the willingness to get vaccinated.; Conclusion: Over 60% of Nigerians are willing to take the COVID-19 vaccines if recommended by health workers. We found male gender, religion, ethnicity, and geographical location to positively influence the willingness of Nigerians to get vaccinated against COVID-19. Health workers should be supported to go beyond the confines of the hospital to educate the general public in schools, marketplaces, churches, and corporate organizations on the efficacy and safety of the approved vaccines. (Copyright © 2021, Eze et al.)</p> |

| Year | Author(s)                                                                                                                                                     | Title                                                                                                                                                                                            | Journal                                 | Abstract                                                                                                                                                                                                                                                                                                                                                                                                                                                                                                                                                                                                                                                                                                                                                                                                                                                                                                                                                                                                                                                                                                                                                                                                                                                                                                                                                                                                                                                                                                                                                                                                                                                                                                                                                                                                                                                                                                                                                                                                                                                                                                            |
|------|---------------------------------------------------------------------------------------------------------------------------------------------------------------|--------------------------------------------------------------------------------------------------------------------------------------------------------------------------------------------------|-----------------------------------------|---------------------------------------------------------------------------------------------------------------------------------------------------------------------------------------------------------------------------------------------------------------------------------------------------------------------------------------------------------------------------------------------------------------------------------------------------------------------------------------------------------------------------------------------------------------------------------------------------------------------------------------------------------------------------------------------------------------------------------------------------------------------------------------------------------------------------------------------------------------------------------------------------------------------------------------------------------------------------------------------------------------------------------------------------------------------------------------------------------------------------------------------------------------------------------------------------------------------------------------------------------------------------------------------------------------------------------------------------------------------------------------------------------------------------------------------------------------------------------------------------------------------------------------------------------------------------------------------------------------------------------------------------------------------------------------------------------------------------------------------------------------------------------------------------------------------------------------------------------------------------------------------------------------------------------------------------------------------------------------------------------------------------------------------------------------------------------------------------------------------|
| 2021 | Umakrishnan Kollamparambil, Adeola Oyenubi and Chijioke Nwosu                                                                                                 | COVID19 vaccine intentions in South Africa: health communication strategy to address vaccine hesitancy                                                                                           | BMC Public Health                       | <p><b>Background:</b> Vaccine hesitancy is emerging as a significant challenge in many parts of the world in the fight against the COVID19 pandemic. The continued infection amongst the unvaccinated can lead to a heightened risk of further virus mutation, exposing even those vaccinated to new virus strains. Therefore, there are social benefits in minimising vaccine hesitancy. The objective of this study is to assess the level of COVID19 vaccine hesitancy in South Africa, identify the socio-economic patterns in vaccine hesitancy and highlight insights from the national survey that can inform the development of a COVID-19 vaccination acceptance communication campaign.</p> <p><b>Methods:</b> The study uses the nationally representative National Income Dynamics Study - Coronavirus Rapid Mobile Survey (NIDS-CRAM) survey. The analysis combines univariate and bivariate statistics, as well as multivariate regression models like binomial/ordinal and multinomial logit.</p> <p><b>Results:</b> The study finds that vaccine acceptance is lower than that of non-pharmaceutical intervention like face-mask use. Only 55% fully accept the vaccine, while a further 16% are moderately accepting of vaccines. Together, vaccine acceptance is estimated at 70.8%, and vaccine hesitancy against COVID19 is estimated at 29.2% amongst the adult South African population. The study has identified the perceived risk of infection with the mediating role of efficacy as a key predictor of vaccine intention. Higher awareness of COVID19 related information and higher household income are correlated with lower vaccine hesitancy. The non-black African population group has significantly high vaccine hesitancy compared to black Africans.</p> <p><b>Conclusions:</b> There are other significant differences across socio-economic and demographic variables in vaccine hesitancy. From a communication perspective, it is imperative to continue risk messaging, hand in hand with clearer information on the efficacy of the vaccines. [ABSTRACT FROM AUTHOR]</p> |
| 2021 | Yewlsey Fentie Alle and Keder Essa Oumer                                                                                                                      | Attitude and associated factors of COVID-19 vaccine acceptance among health professionals in Debre Tabor Comprehensive Specialized Hospital, North Central Ethiopia; 2021: cross-sectional study | Virusdisease                            |                                                                                                                                                                                                                                                                                                                                                                                                                                                                                                                                                                                                                                                                                                                                                                                                                                                                                                                                                                                                                                                                                                                                                                                                                                                                                                                                                                                                                                                                                                                                                                                                                                                                                                                                                                                                                                                                                                                                                                                                                                                                                                                     |
| 2021 | Yitayeh Belsti, Yibeltal Yismaw Gela, Yonas Akalu, Baye Dagneu, Mihret Getnet, Mohammed Abdu Seid, Mengistie Diress, Yigizie Yeshaw and Sofonias Addis Fekadu | Willingness of Ethiopian population to receive COVID-19 vaccine                                                                                                                                  | Journal of Multidisciplinary Healthcare |                                                                                                                                                                                                                                                                                                                                                                                                                                                                                                                                                                                                                                                                                                                                                                                                                                                                                                                                                                                                                                                                                                                                                                                                                                                                                                                                                                                                                                                                                                                                                                                                                                                                                                                                                                                                                                                                                                                                                                                                                                                                                                                     |

| Year | Author(s)                                                                                                                         | Title                                                                                                                                     | Journal                     | Abstract                                                                                                                                                                                                                                                                                                                                                                                                                                                                                                                                                                                                                                                                                                                                                                                                                                                                                                                                                                                                                                                                                                                                                                                                                                                                                                                                                                                                                                                                                                                                                                                                                                                                                                                                                                                                                                                                                                                                                                                                                                             |
|------|-----------------------------------------------------------------------------------------------------------------------------------|-------------------------------------------------------------------------------------------------------------------------------------------|-----------------------------|------------------------------------------------------------------------------------------------------------------------------------------------------------------------------------------------------------------------------------------------------------------------------------------------------------------------------------------------------------------------------------------------------------------------------------------------------------------------------------------------------------------------------------------------------------------------------------------------------------------------------------------------------------------------------------------------------------------------------------------------------------------------------------------------------------------------------------------------------------------------------------------------------------------------------------------------------------------------------------------------------------------------------------------------------------------------------------------------------------------------------------------------------------------------------------------------------------------------------------------------------------------------------------------------------------------------------------------------------------------------------------------------------------------------------------------------------------------------------------------------------------------------------------------------------------------------------------------------------------------------------------------------------------------------------------------------------------------------------------------------------------------------------------------------------------------------------------------------------------------------------------------------------------------------------------------------------------------------------------------------------------------------------------------------------|
| 2021 | Yusuff Adebayo Adebisi, Aishat Jumoke Alaran, Obasanjo Afolabi Bolarinwa, Wuraola Akande Sholabi and Don Eliseo Lucero-Prisno Iii | When it is available, will we take it? Social media users' perception of hypothetical COVID-19 vaccine in Nigeria                         | Pan African Medical Journal | Introduction: COVID-19 pandemic is a global public health threat facing mankind. There is no specific antiviral treatment for COVID-19, and many vaccine candidates are currently under clinical trials. This study aimed to understand the perception of social media users regarding a hypothetical COVID-19 vaccine in Nigeria. Methods: we conducted a cross-sectional survey among social media users in Nigeria in August 2020 using an online questionnaire. The questionnaire includes sections on the demographic characteristics of the respondents and their perception regarding a hypothetical COVID-19 vaccine. A total of 517 respondents completed and returned the informed consent along with the questionnaire electronically. Data were coded and abstracted into Microsoft Excel spreadsheet and loaded into the STATA 14 software for final analysis. Results: the results showed that more than half of the respondents were male 294 (56.9%). Most of the respondents 385 (74.5%) intend to take the COVID-19 vaccine when it becomes available. Among the 132 respondents that would not take the COVID-19 vaccine, the major reason for non-acceptance was unreliability of the clinical trials 49 (37.1%), followed by the belief that their immune system is sufficient to combat the virus 36 (27.3%). We found a significant association between the age of the respondents and the COVID-19 vaccine acceptance (P-value=0.00) as well as geographical location and COVID-19 vaccine acceptance (P-value=0.02). Conclusion: it was observed that most of the respondents were willing to take the COVID-19 vaccine. Our findings also reiterate the need to reassure the public the benefits an effective and safe COVID-19 vaccine can reap for public health. There is a need for national health authorities in Nigeria to ensure public trust is earned and all communities, including the marginalized populations, are properly engaged to ensure an optimal COVID-19 vaccine acceptance. [ABSTRACT FROM AUTHOR] |
| 2021 | Z. Iliyasu, A. A. Umar, H. M. Abdullahi, A. A. Kwaku, T. G. Amole, F. I. Tsiga-Ahmed, R. M. Garba, H. M. Salihu and M. H. Aliyu   | They have produced a vaccine, but we doubt if COVID-19 exists: correlates of COVID-19 vaccine acceptability among adults in Kano, Nigeria | Hum Vaccin Immunother       | Vaccination is a critical tool in the global response to the COVID-19 pandemic. Yet, COVID-19 vaccine hesitancy has not been well explored in parts of Nigeria. We assessed the predictors of acceptability of the COVID-19 vaccine and identified reasons for vaccine hesitancy among adults in urban Kano, northern Nigeria. Using a mixed-methods design, we administered structured questionnaires to a cross-section of adults (n = 446), complemented with 20 in-depth interviews. Binary logistic regression and the framework approach were used to analyze the data. About one-half (51.1%, n = 228) of the respondents were willing to take the COVID-19 vaccine. Vaccine acceptance was higher among older respondents ( $\geq 30$ years) (adjusted Odds Ratio (aOR) = 1.76, 95% Confidence Interval (CI): 1.14-2.99 ( $\geq 30$ vs. $< 30$ ), higher-income earners ( $\geq 30,000$ Naira) (aOR = 2.06, 95%CI:1.12-3.80, $\geq 30,000$ vs. $< 30,000$ ), and those with a history of a chronic medical disorder (aOR = 1.90, 95%CI:1.06-3.72). Vaccine acceptance was also higher in persons with high risk perception (aOR = 1.61, 95%CI:1.13-2.81, high vs. low), those who were unconcerned about vaccine safety (aOR = 1.71, 95%CI:1.13-3.55), and those who were not worried about efficacy (aOR = 2.02, 95%CI:1.14-4.11) and infertility-related rumors (aOR = 1.98, 95%CI:1.24-3.18). Themes revealed doubts about the existence of COVID-19, mistrust for authorities, and popular credence to rumors and conspiracy theories. In conclusion, COVID-19 vaccine acceptance was sub-optimal and influenced by respondent's age, income, co-morbidities, risk perception, and concerns about vaccine safety, efficacy, and rumors. Context-specific, evidence-based risk communication strategies and trust-building measures could boost vaccine confidence in similar settings.                                                                                                                                                   |

| Year | Author(s)                                                                                                                                                        | Title                                                                                                                                                                                      | Journal                     | Abstract                                                                                                                                                                                                                                                                                                                                                                                                                                                                                                                                                                                                                                                                                                                                                                                                                                                                                                                                                                                                                                                                                                                                                                                                                                                                                                                                                                                                                                                                                                                                                                                                                                                                                                                                           |
|------|------------------------------------------------------------------------------------------------------------------------------------------------------------------|--------------------------------------------------------------------------------------------------------------------------------------------------------------------------------------------|-----------------------------|----------------------------------------------------------------------------------------------------------------------------------------------------------------------------------------------------------------------------------------------------------------------------------------------------------------------------------------------------------------------------------------------------------------------------------------------------------------------------------------------------------------------------------------------------------------------------------------------------------------------------------------------------------------------------------------------------------------------------------------------------------------------------------------------------------------------------------------------------------------------------------------------------------------------------------------------------------------------------------------------------------------------------------------------------------------------------------------------------------------------------------------------------------------------------------------------------------------------------------------------------------------------------------------------------------------------------------------------------------------------------------------------------------------------------------------------------------------------------------------------------------------------------------------------------------------------------------------------------------------------------------------------------------------------------------------------------------------------------------------------------|
| 2021 | Zubairu Iliyasu, Muhammad R. Garba, Auwalu U. Gajida, Taiwo G. Amole, Amina A. Umar, Hadiza M. Abdullahi, Aminatu A. Kwaku, Hamisu M. Salihu and Muktar H. Aliyu | 'Why Should I Take the COVID-19 Vaccine after Recovering from the Disease?' A Mixed-methods Study of Correlates of COVID-19 Vaccine Acceptability among Health Workers in Northern Nigeria | Pathogens and global health | We assessed the acceptability of COVID-19 vaccine, predictors, and reasons for vaccine hesitancy among clinical and non-clinical staff at a tertiary hospital in Kano, northern Nigeria. Using a mixed-methods design, structured questionnaires were administered to 284 hospital staff, followed by 20 in-depth interviews with a purposive sub-sample. Logistic regression and the framework approach were used to analyze the data. Only 24.3% (n = 69) of the respondents were willing to accept the COVID-19 vaccine. Acceptance was lower among females (Adjusted Odds Ratio (aOR) = 0.37, 95% Confidence Interval (95%CI): 0.18-0.77 (male vs. female), nurses/midwives (aOR = 0.41, 95%CI: 0.13-0.60, physicians vs. nurses/midwives), persons not tested for COVID-19 (aOR = 0.32, 95%CI 0.13-0.79) (no vs. yes) and those who perceived themselves to be at low risk of COVID-19 (aOR = 0.47, 95%CI: 0.21-0.89, low vs. high). In contrast, vaccine acceptance was higher among more experienced workers (aOR = 2.28, 95%CI: 1.16-8.55, ≥10 vs. <5 years). Vaccine acceptance was also higher among persons who did not worry about vaccine efficacy (aOR = 2.35, 95%CI: 1.18-6.54, no vs. yes), or about vaccine safety (aOR = 1.76, 95%CI: 1.16-5.09, no vs. yes), side effects (aOR = 1.85, 95%CI: 1.17-5.04, no vs. yes), or rumors (aOR = 2.55, 95%CI: 1.25-5.20, no vs. yes). The top four reasons for vaccine hesitancy included distrust, inadequate information, fear of long-term effects, and infertility-related rumors. Concerted efforts are required to build COVID-19 vaccine confidence among health workers in Kano, Nigeria. Our findings can help guide implementation of COVID-19 vaccination in similar settings. |



## Preferred Reporting Items for Systematic reviews and Meta-Analyses extension for Scoping Reviews (PRISMA-ScR) Checklist

| SECTION                           | ITEM | PRISMA-ScR CHECKLIST ITEM                                                                                                                                                                                                                                                                                  | REPORTED ON PAGE #       |
|-----------------------------------|------|------------------------------------------------------------------------------------------------------------------------------------------------------------------------------------------------------------------------------------------------------------------------------------------------------------|--------------------------|
| <b>TITLE</b>                      |      |                                                                                                                                                                                                                                                                                                            |                          |
| Title                             | 1    | Identify the report as a scoping review.                                                                                                                                                                                                                                                                   | 1                        |
| <b>ABSTRACT</b>                   |      |                                                                                                                                                                                                                                                                                                            |                          |
| Structured summary                | 2    | Provide a structured summary that includes (as applicable): background, objectives, eligibility criteria, sources of evidence, charting methods, results, and conclusions that relate to the review questions and objectives.                                                                              | 2-3                      |
| <b>INTRODUCTION</b>               |      |                                                                                                                                                                                                                                                                                                            |                          |
| Rationale                         | 3    | Describe the rationale for the review in the context of what is already known. Explain why the review questions/objectives lend themselves to a scoping review approach.                                                                                                                                   | 4-7                      |
| Objectives                        | 4    | Provide an explicit statement of the questions and objectives being addressed with reference to their key elements (e.g., population or participants, concepts, and context) or other relevant key elements used to conceptualize the review questions and/or objectives.                                  | 7-8                      |
| <b>METHODS</b>                    |      |                                                                                                                                                                                                                                                                                                            |                          |
| Protocol and registration         | 5    | Indicate whether a review protocol exists; state if and where it can be accessed (e.g., a Web address); and if available, provide registration information, including the registration number.                                                                                                             | 8                        |
| Eligibility criteria              | 6    | Specify characteristics of the sources of evidence used as eligibility criteria (e.g., years considered, language, and publication status), and provide a rationale.                                                                                                                                       | 8-9                      |
| Information sources*              | 7    | Describe all information sources in the search (e.g., databases with dates of coverage and contact with authors to identify additional sources), as well as the date the most recent search was executed.                                                                                                  | 10                       |
| Search                            | 8    | Present the full electronic search strategy for at least 1 database, including any limits used, such that it could be repeated.                                                                                                                                                                            | 10, Supplementary file 1 |
| Selection of sources of evidence† | 9    | State the process for selecting sources of evidence (i.e., screening and eligibility) included in the scoping review.                                                                                                                                                                                      | 10                       |
| Data charting process‡            | 10   | Describe the methods of charting data from the included sources of evidence (e.g., calibrated forms or forms that have been tested by the team before their use, and whether data charting was done independently or in duplicate) and any processes for obtaining and confirming data from investigators. | 10                       |
| Data items                        | 11   | List and define all variables for which data were sought and any assumptions and simplifications made.                                                                                                                                                                                                     | 9-10                     |
| Critical appraisal of individual  | 12   | If done, provide a rationale for conducting a critical appraisal of included sources of evidence; describe                                                                                                                                                                                                 | n/a                      |

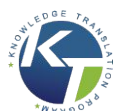

| SECTION                                       | ITEM | PRISMA-ScR CHECKLIST ITEM                                                                                                                                                                       | REPORTED ON PAGE # |
|-----------------------------------------------|------|-------------------------------------------------------------------------------------------------------------------------------------------------------------------------------------------------|--------------------|
| sources of evidence§                          |      | the methods used and how this information was used in any data synthesis (if appropriate).                                                                                                      |                    |
| Synthesis of results                          | 13   | Describe the methods of handling and summarizing the data that were charted.                                                                                                                    | 9-10               |
| <b>RESULTS</b>                                |      |                                                                                                                                                                                                 |                    |
| Selection of sources of evidence              | 14   | Give numbers of sources of evidence screened, assessed for eligibility, and included in the review, with reasons for exclusions at each stage, ideally using a flow diagram.                    | 11                 |
| Characteristics of sources of evidence        | 15   | For each source of evidence, present characteristics for which data were charted and provide the citations.                                                                                     | 11-19              |
| Critical appraisal within sources of evidence | 16   | If done, present data on critical appraisal of included sources of evidence (see item 12).                                                                                                      | n/a                |
| Results of individual sources of evidence     | 17   | For each included source of evidence, present the relevant data that were charted that relate to the review questions and objectives.                                                           | 11-19              |
| Synthesis of results                          | 18   | Summarize and/or present the charting results as they relate to the review questions and objectives.                                                                                            | 11-19              |
| <b>DISCUSSION</b>                             |      |                                                                                                                                                                                                 |                    |
| Summary of evidence                           | 19   | Summarize the main results (including an overview of concepts, themes, and types of evidence available), link to the review questions and objectives, and consider the relevance to key groups. | 19-22              |
| Limitations                                   | 20   | Discuss the limitations of the scoping review process.                                                                                                                                          | 21-22              |
| Conclusions                                   | 21   | Provide a general interpretation of the results with respect to the review questions and objectives, as well as potential implications and/or next steps.                                       | 22-23              |
| <b>FUNDING</b>                                |      |                                                                                                                                                                                                 |                    |
| Funding                                       | 22   | Describe sources of funding for the included sources of evidence, as well as sources of funding for the scoping review. Describe the role of the funders of the scoping review.                 | 23                 |

JB1 = Joanna Briggs Institute; PRISMA-ScR = Preferred Reporting Items for Systematic reviews and Meta-Analyses extension for Scoping Reviews.

\* Where *sources of evidence* (see second footnote) are compiled from, such as bibliographic databases, social media platforms, and Web sites.

† A more inclusive/heterogeneous term used to account for the different types of evidence or data sources (e.g., quantitative and/or qualitative research, expert opinion, and policy documents) that may be eligible in a scoping review as opposed to only studies. This is not to be confused with *information sources* (see first footnote).

‡ The frameworks by Arksey and O'Malley (6) and Levac and colleagues (7) and the JBI guidance (4, 5) refer to the process of data extraction in a scoping review as data charting.

§ The process of systematically examining research evidence to assess its validity, results, and relevance before using it to inform a decision. This term is used for items 12 and 19 instead of "risk of bias" (which is more applicable to systematic reviews of interventions) to include and acknowledge the various sources of evidence that may be used in a scoping review (e.g., quantitative and/or qualitative research, expert opinion, and policy document).

From: Tricco AC, Lillie E, Zarin W, O'Brien KK, Colquhoun H, Levac D, et al. PRISMA Extension for Scoping Reviews (PRISMA-ScR): Checklist and Explanation. *Ann Intern Med.* 2018;169:467–473. doi: 10.7326/M18-0850.

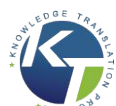

St. Michael's

Inspired Care.  
Inspiring Science.

For peer review only - <http://bmjopen.bmj.com/site/about/guidelines.xhtml>

# BMJ Open

## Determinants of COVID-19 vaccine hesitancy and uptake in sub-Saharan Africa: A scoping review

|                                 |                                                                                                                                                                                                                                                                                                                                                                                                                    |
|---------------------------------|--------------------------------------------------------------------------------------------------------------------------------------------------------------------------------------------------------------------------------------------------------------------------------------------------------------------------------------------------------------------------------------------------------------------|
| Journal:                        | <i>BMJ Open</i>                                                                                                                                                                                                                                                                                                                                                                                                    |
| Manuscript ID                   | bmjopen-2022-066615.R2                                                                                                                                                                                                                                                                                                                                                                                             |
| Article Type:                   | Original research                                                                                                                                                                                                                                                                                                                                                                                                  |
| Date Submitted by the Author:   | 01-Nov-2022                                                                                                                                                                                                                                                                                                                                                                                                        |
| Complete List of Authors:       | Deml, Michael; University of Geneva, Institute of Sociological Research, Department of Sociology; University of Cape Town Faculty of Health Sciences, School of Public Health and Family Medicine, Division of Social and Behavioural Sciences<br>Githaiga, Jennifer; University of Cape Town Faculty of Health Sciences, School of Public Health and Family Medicine, Division of Social and Behavioural Sciences |
| <b>Primary Subject Heading</b>: | Public health                                                                                                                                                                                                                                                                                                                                                                                                      |
| Secondary Subject Heading:      | Public health, Infectious diseases, Immunology (including allergy), Health services research, Global health                                                                                                                                                                                                                                                                                                        |
| Keywords:                       | COVID-19, PUBLIC HEALTH, EPIDEMIOLOGY, Infection control < INFECTIOUS DISEASES, Public health < INFECTIOUS DISEASES                                                                                                                                                                                                                                                                                                |
|                                 |                                                                                                                                                                                                                                                                                                                                                                                                                    |

SCHOLARONE™  
Manuscripts



I, the Submitting Author has the right to grant and does grant on behalf of all authors of the Work (as defined in the below author licence), an exclusive licence and/or a non-exclusive licence for contributions from authors who are: i) UK Crown employees; ii) where BMJ has agreed a CC-BY licence shall apply, and/or iii) in accordance with the terms applicable for US Federal Government officers or employees acting as part of their official duties; on a worldwide, perpetual, irrevocable, royalty-free basis to BMJ Publishing Group Ltd ("BMJ") its licensees and where the relevant Journal is co-owned by BMJ to the co-owners of the Journal, to publish the Work in this journal and any other BMJ products and to exploit all rights, as set out in our [licence](#).

The Submitting Author accepts and understands that any supply made under these terms is made by BMJ to the Submitting Author unless you are acting as an employee on behalf of your employer or a postgraduate student of an affiliated institution which is paying any applicable article publishing charge ("APC") for Open Access articles. Where the Submitting Author wishes to make the Work available on an Open Access basis (and intends to pay the relevant APC), the terms of reuse of such Open Access shall be governed by a Creative Commons licence – details of these licences and which [Creative Commons](#) licence will apply to this Work are set out in our licence referred to above.

Other than as permitted in any relevant BMJ Author's Self Archiving Policies, I confirm this Work has not been accepted for publication elsewhere, is not being considered for publication elsewhere and does not duplicate material already published. I confirm all authors consent to publication of this Work and authorise the granting of this licence.

1  
2  
3 **Determinants of COVID-19 vaccine hesitancy and uptake in sub-Saharan Africa: A**  
4 **scoping review**  
5

6 **Authors and Co-authors:**  
7

8 **Michael J. Deml\* <sup>1,2</sup> (corresponding author)**

9 Postal address:

10 School of Public Health & Family Medicine  
11 Faculty of Health Sciences, University of Cape Town  
12 Falmouth Building, Anzio Road, Observatory, 7925

13 Email: [michaeljdeml@gmail.com](mailto:michaeljdeml@gmail.com)

14 Telephone: +27 21 406 6300

15 Fax: +27 21 406 6459  
16  
17  
18

19 **Jennifer Nyawira Githaiga\* <sup>2</sup>**

20 Postal address:

21 Division of Social and Behavioural Sciences  
22 School of Public Health & Family Medicine  
23 Faculty of Health Sciences, University of Cape Town  
24 Falmouth Building, Anzio Road, Observatory, 7925

25 Email: [Jennifer.githaiga@uct.ac.za](mailto:Jennifer.githaiga@uct.ac.za)

26 Telephone: +27 21 406 6300

27 Fax: +27 21 406 6459  
28  
29  
30  
31

32 \*equal contribution

33 <sup>1</sup> University of Geneva, Institute of Sociological Research, Department of Sociology,  
34 Geneva, Switzerland

35 <sup>2</sup> University of Cape Town, Faculty of Health Sciences, School of Public Health and  
36 Family Medicine, Division of Social and Behavioural Sciences, Cape Town, South Africa  
37  
38

39 **Keywords:** COVID-19, vaccine hesitancy, scoping review, access, sub-Saharan Africa  
40

41 **Word count: 5538**  
42  
43  
44  
45  
46  
47  
48  
49  
50  
51  
52  
53  
54  
55  
56  
57  
58  
59  
60

1  
2  
3 **Determinants of COVID-19 vaccine hesitancy and uptake in sub-Saharan Africa: A**  
4 **scoping review**  
5

6  
7 **ABSTRACT**  
8

9  
10 **Objective** To identify, describe and map the research tools used to measure COVID-19  
11 vaccine hesitancy, refusal, acceptance and access in sub-Saharan Africa.  
12  
13

14 **Design** Scoping review  
15

16  
17 **Methods** In March 2022, we searched PubMed, Scopus, Web of Science, Cochrane,  
18 Academic Search Premier, MEDLINE, CINAHL, Health Source Nursing, Africa Wide and  
19 APA PsychInfo for peer-reviewed literature in English related to COVID-19 vaccine  
20 hesitancy, refusal, acceptance, and access in SSA. We used the Preferred Reporting  
21 Items for Systematic Reviews and Meta-Analyses extension for Scoping Reviews  
22 (PRISMA-ScR) to guide evidence gathering and as a template to present the evidence  
23 retrieval process.  
24  
25

26  
27 **Results** In the studies selected for review (n=72) several measurement tools were  
28 utilised to measure COVID-19 vaccine hesitancy, acceptance, and refusal. These  
29 measurements were *willingness* and *intent* to vaccinate from the perspectives of the  
30 general population, special population groups such as mothers, students and staff in  
31 academic institutions and healthcare workers, and *uptake* as a proxy for measuring  
32 assumed COVID-19 vaccine acceptance. Measurements of access to COVID-19  
33 vaccination were cost and affordability, convenience, distance, and time to travel or time  
34 waiting for a vaccine, and (dis)comfort. Although all studies measured COVID-19  
35 vaccine hesitancy, acceptance, and refusal, relatively few studies (n=16, 22.2%)  
36 included explicit measurements of access to COVID-19 vaccination.  
37  
38  
39  
40  
41  
42  
43  
44  
45  
46  
47  
48  
49  
50  
51  
52  
53  
54  
55  
56  
57  
58  
59  
60

1  
2  
3 **Conclusions** Based upon the gaps identified in the scoping review, we propose that  
4  
5 future research on determinants of COVID-19 vaccination in sub-Saharan Africa should  
6  
7 further prioritize the inclusion of access-related variables. We recommend the  
8  
9 development and use of standardized research tools that can operationalize, measure,  
10  
11 and disentangle the complex determinants of vaccine uptake in future studies  
12  
13 throughout sub-Saharan Africa and other LMIC settings.  
14  
15  
16  
17  
18

### 19 **STRENGTHS AND LIMITATIONS OF THIS STUDY**

- 21 • We followed the PRISMA-ScR guidelines to retrieve peer-reviewed publications in  
22 English from 10 databases about COVID-19 vaccine hesitancy, refusal, acceptance,  
23 and access in sub-Saharan Africa.  
24  
25
- 26 • The scoping review was guided assisted by a university librarian with expertise in  
27 scoping reviews.  
28  
29
- 30 • The scoping review process allowed us synthesize and map current evidence, to  
31 provide a broad picture of how relatively few studies have so far have measured issues  
32 related to COVID-19 vaccine access, especially in combination with vaccine  
33 hesitancy, refusal, and acceptance.  
34  
35
- 36 • The decision to exclude grey literature (conference proceedings, reports, opinion  
37 pieces, commentaries) and non-English language texts in our analysis) may have  
38 limited the data that was available to us.  
39  
40  
41  
42  
43  
44  
45  
46  
47  
48  
49  
50  
51  
52  
53  
54  
55  
56  
57  
58  
59  
60

## INTRODUCTION

In 2019, the World Health Organization (WHO) listed *vaccine hesitancy* among 10 threats to global health. Predating the advent of the COVID-19 pandemic, this announcement defined vaccine hesitancy as “the reluctance or refusal to vaccinate despite the availability of vaccines” and pointed to the complex issues underscoring why people might not get vaccinated, such as “complacency, inconvenience in accessing vaccines, and lack of confidence”<sup>[1]</sup>. Social and behavioral health scientists researching vaccine hesitancy and *vaccine uptake*—whether people get vaccinated or not—have long been working on these questions, with a systematic review from a global perspective arguing that there is no “universal algorithm” (p. 2155) and that the determinants of vaccine hesitancy are complex, context-specific and vary across time, place, and vaccine<sup>[2]</sup>. A fundamental message to adequately understand and address *under-immunization*, or vaccination rates that do not meet public health targets, is that vaccine hesitancy as a determinant for vaccine uptake needs to be disentangled from other determinants unrelated to people’s reluctance to vaccinate. Bedford et al. 2018, for example, explain how hesitancy can be “used inaccurately as the explanation for under-vaccination in a population when the causes are related to pragmatics, competing priorities, access, or the failure of services or policies” (p. 6656)<sup>[3]</sup>.

Before the COVID-19 pandemic began, research on determinants of vaccine uptake had typically been conducted in high-income countries (HICs) with developed healthcare systems and overall regular and dependable access to vaccination for eligible populations. Much of this research focused on parental vaccine hesitancy and pointed to vaccine refusal in HICs as a privileged parenting practice, noting how parents who



1  
2  
3 refused vaccination counted on having adequate access to medical care should their non-  
4  
5 or under-vaccinated children fall ill from vaccine preventable diseases<sup>[4-6]</sup>. Other studies  
6  
7 from HICs have pointed to some parents' adherence to alternative conceptions of health,  
8  
9 complementary medicine, and neoliberal parenting practices as influencing factors for  
10  
11 vaccine hesitancy and vaccine refusal<sup>[7-15]</sup>. Some studies in these settings have  
12  
13 particularly focused on the important roles healthcare professionals play in parents'  
14  
15 vaccine decision-making process, citing children's doctors as the most important and  
16  
17 trusted source of vaccination information<sup>[15-19]</sup>.

21  
22 Comparatively fewer social and behavioral vaccine attitude and uptake studies had been  
23  
24 conducted in LMICs than in HICs before the COVID-19 pandemic. Such studies tended  
25  
26 to focus on lack of education, inequality, and access issues, rumors about vaccination,  
27  
28 and 'non-biomedical' approaches to medicine in these countries as determinants of  
29  
30 parents' vaccination decisions<sup>[2 20 21]</sup>. However, research has been increasing in LMICs,  
31  
32 with a particular focus on COVID-19 vaccine attitudes and uptake, both in anticipation of  
33  
34 and following the arrival of safe and effective vaccines.

37  
38 Our focus is sub-Saharan Africa (SSA), where healthcare systems are characterized by  
39  
40 three distinctive features: (1) high disease burden, (2) inadequate resources, and (3)  
41  
42 challenges related to leadership and governance. These three features influence public  
43  
44 access to health care, including quality of service delivery, and how systems respond to  
45  
46 mundane events and crises such as epidemic outbreaks. Firstly, SSA healthcare systems  
47  
48 are not only strongly affected by a high burden of communicable diseases (e.g. HIV,  
49  
50 tuberculosis, malaria, and diarrheal diseases), non-communicable diseases (e.g. heart  
51  
52 disease, obesity, diabetes, and mental illness), maternal and child mortality, but also  
53  
54  
55  
56  
57  
58  
59  
60

1  
2  
3 grapple with illnesses arising from climate change and environmental pollution and  
4  
5 violence-related injuries both at interpersonal levels and in the context of conflict in fragile  
6  
7 states [22-24]. Secondly, relative to healthcare systems in HICs, SSA healthcare systems  
8  
9 are under-resourced with regards to health care workers, physical infrastructure and  
10  
11 facilities, and financial resources with glaring disparities in access to health care based  
12  
13 on geographical areas (rural vs. urban) and socio-economic strata [22-24]. A recent report  
14  
15 on public health care in SSA indicated that 1 in 6 people live more than 2 hours away  
16  
17 from their nearest public hospital while 1 in 8 people live 1 hour or more away from their  
18  
19 closest health center<sup>[25]</sup>. Thirdly, challenges related to leadership and governance stem  
20  
21 from a combination of historical and political factors in post-independence countries as  
22  
23 governments have sought to develop healthcare systems, a period characterized by  
24  
25 health reforms, economic instability and subsequent structural adjustment sanctions  
26  
27 introduced by international donors such as The World Bank and the International  
28  
29 Monetary Fund<sup>[26]</sup>. Governments' inability to finance healthcare systems has culminated  
30  
31 in the growth of public-private partnerships (PPPs), where governments contract non-  
32  
33 state providers to assist in health care provision as a means of expanding access to health  
34  
35 care particularly in marginalized areas<sup>[27]</sup>.

36  
37  
38 The COVID-19 pandemic and resulting mitigation measures have exacerbated existing  
39  
40 healthcare system challenges, causing significant strain on the limited available  
41  
42 resources, which has resulted in poor health outcomes. For instance, strict lockdowns in  
43  
44 many SSA countries disrupted provision non-COVID related health services, led to loss  
45  
46 of livelihoods and economic recession [28 29], and low levels of trust in governments'  
47  
48 responses to the crisis. Existing socio-economic disparities have served as barriers in  
49  
50  
51  
52  
53  
54  
55  
56  
57  
58  
59  
60

1  
2  
3 adherence to COVID-19 prevention protocols<sup>[29]</sup>. An analysis of demographic health  
4 surveys in 16 SSA countries revealed that only 33.5% of households had water and soap  
5 available to support handwashing practices, with greater access in urban compared to  
6 rural areas<sup>[30]</sup>. For instance, approximately only 25% of South Africans from the poorest  
7 quintile and close to 40% of rural citizens had access to soap and water<sup>[30]</sup>. Similarly, in  
8 the context of abject poverty and food insecurity more so during the hard lockdown, the  
9 threat of COVID-19 has obscured socio-economic challenges<sup>[31]</sup>.

19 COVID-19 vaccination has featured prominently in discussions globally as well as in SSA.  
20 Scholars have noted that whereas such discussions have focused on procurement,  
21 supply and financing of vaccines<sup>[32]</sup>, there is a specific need for engagement with COVID-  
22 19 vaccine hesitancy <sup>[28 33]</sup>. There is a strong need for a nuanced understanding of specific  
23 contexts and barriers to COVID-19 vaccine uptake given the existing evidence of varying  
24 rates of both vaccine hesitancy and uptake reported in various SSA countries<sup>[33-37]</sup>. A  
25 concise narrative review of global literature reported varying degrees of COVID-19  
26 vaccine hesitancy and acceptance, with high vaccine hesitancy prevalence reported in  
27 West and Central Africa<sup>[38]</sup>. Furthermore, COVID-19 vaccine uptake has lagged  
28 considerably in sub-Saharan Africa compared to other regions globally<sup>[39]</sup>. Particularly,  
29 given the striking healthcare system disparities between HICs and LMICs, it is essential  
30 to understand the underlying determinants of COVID-19 vaccine uptake in a way that  
31 allows for a nuanced distinction between uptake as it relates to vaccine attitudes and  
32 uptake as it relates to access issues.

## Objective

The primary objective of this scoping review was to identify, describe and map the operationalization and measurement of COVID-19 vaccine hesitancy, refusal, acceptance and access as these relate to COVID-19 vaccine uptake in SSA. To our knowledge, limited research has so far attempted to disentangle COVID-19 vaccine attitudes from COVID-19 vaccine access issues as determinants of COVID-19 vaccine uptake in SSA. Therefore, this scoping review seeks to address the following research question: *How have researchers operationalized and measured vaccine hesitancy and vaccine access as these variables relate to COVID-19 vaccine uptake in sub-Saharan Africa?*

## METHODS

This scoping review was informed by Levac et al. 2010<sup>[40]</sup> version of Arksey and O'Malley's (2005) framework for scoping reviews<sup>[41]</sup> and the scoping review methodology of the Joanna Briggs Institute<sup>[42 43]</sup>. The Preferred Reporting Items for Systematic Reviews and Meta-Analyses extension (PRISMA) for Scoping Reviews<sup>[44 45]</sup> was utilized to guide evidence gathering and as a template to present the evidence retrieval process. There is no review protocol for this scoping review.

## Eligibility criteria

### *Concept*

Data sources with information on COVID-19 vaccination, vaccine hesitancy, acceptance, refusal, vaccine access, and/or vaccine uptake were included in this review. Studies that did not include any of the listed thematic areas were excluded. Studies authored in English were included while all non-English articles were excluded.

## Context

Articles included in this review were either fully or partially sub-Saharan African (SSA) based, for example, multi-country studies which included both SSA and non-SSA countries. All studies included were published during the COVID-19 pandemic. Non-SSA studies and pre-COVID studies were excluded.

## *Types of evidence sources*

We included peer-reviewed, full-text journal articles comprising primary, empirical studies, and reviews. Qualitative, quantitative, and/or mixed methods studies were included. The following categories of sources were excluded: abstract only; full text not available; non-peer-reviewed articles; grey literature (conference proceedings, reports, opinion pieces, commentaries).

## **Search strategy and study selection**

On March 9, 2022, a research librarian and two study authors (MJD and JG) collaboratively developed and refined the search strategy to include peer-reviewed articles in English that measured COVID-19 vaccine hesitancy, acceptance, refusal, and access in sub-Saharan Africa. We excluded grey literature, such as conference proceedings, reports, opinion pieces, and commentaries. The search strategy included the following search terms: “COVID-19” OR “coronavirus 2019” OR “SARS-CoV-2” OR “SARS-2” OR “severe acute respiratory syndrome coronavirus 2”, “vaccination hesitancy” OR “vaccine hesitancy” OR “vaccine refusal” OR “vaccination refusal” OR “vaccine access” OR “access” OR “sub-Saharan Africa.” The search term “sub-Saharan Africa” was used to capture studies conducted within this region. We did not include a date filter as we expected that studies related to COVID-19 would be published during the period

1  
2  
3 of the pandemic. A total of 10 databases were searched for relevant articles: PubMed,  
4  
5 Scopus, Web of Science, Cochrane, Academic Search Premier, MEDLINE, Cumulative  
6  
7 Index to Nursing and Allied Health Literature (CINAHL), Health Source Nursing, Africa  
8  
9 Wide and APA PsychInfo. The search strategy was first used in PubMed and adapted for  
10  
11 use in the remaining nine databases and is presented in “Supplementary file 1.” Articles  
12  
13 from all 10 databases were exported to EndNote and duplicates removed. MJD and JG  
14  
15 manually searched reference lists of articles retrieved from the databases for additional  
16  
17 relevant articles. They then screened all articles, removing duplicates undetected by  
18  
19 EndNote and articles with content falling outside of the scope of the review.  
20  
21  
22

23  
24 The process of abstract and title screening, based on the inclusion criteria, commenced  
25  
26 with both reviewers piloting CINAHL and APA Psychoinfo databases together.  
27  
28 Disagreements were discussed and resolved through consensus among authors. The  
29  
30 remaining articles and databases were then randomly divided into two and each of the  
31  
32 reviewers assigned one sub-set of articles for independent title and abstract screening.  
33  
34 All articles which met the inclusion criteria were selected for full text review. Some of the  
35  
36 articles selected for full review were excluded during full text review screening.  
37  
38  
39

#### 40 **Data extraction**

41  
42 Authors (MJD and JG) created a data extraction form and independently conducted pilot  
43  
44 data extraction on nine randomly selected articles. Following pilot data extraction, the  
45  
46 data extraction form was refined to include:  
47  
48

- 49 1) General descriptive data, namely the article reference number in EndNote, year of  
50 publication, author(s), publication title, aim, study population, country/countries  
51  
52
- 53 2) Data on methods, such as types of studies, measurement scales and tools utilised  
54  
55  
56  
57  
58  
59  
60

- 3) Sociodemographic details of participants included in the selected studies
- 4) Study measurement tools and operationalisation of vaccine hesitancy, vaccine acceptance, vaccine refusal, vaccine access, and vaccine uptake

### **Patient and public involvement**

As this was a scoping review, patients and the public were not involved in the design, conduct, reporting, or dissemination plans of our research.

### **RESULTS**

A total of 3916 articles were retrieved from database searches in Academic Search Premier (n=558), Africa Wide (n=219), APA Psycinfo (n=64), CINAHL (n=127), Cochrane (n=0), Health Source Nursing (n=83), MEDLINE (n=873), PubMed (n=612), Scopus (n=1205), Web of Science (n=175). Additional articles were manually sourced from reference lists of articles from databases (n=10), yielding a total of 3926 articles. Of these, 665 duplicate records were identified by EndNote and removed. The remaining 3261 articles were screened for eligibility and of these, 3151 articles were excluded. A total of 110 full text articles were sought for retrieval of which four were not available in full text. Of the 106 full text articles evaluated, 72 studies met the inclusion criteria and were included in this review. The study selection process is captured in a PRISMA flow diagram (Figure 1). The document "Supplementary file 2" includes a list of authors, titles, journal, and abstracts of the 72 studies reviewed in the scoping review.

[Insert Figure 1: PRISMA Flow Diagram]

### **Characteristics of studies included**

The 72 full text articles reviewed included comprised of cross-sectional studies (n=62), systematic reviews (n=4), qualitative studies (n=3), mixed methods studies (n=2), and

sentiment analysis (n=1). The articles reviewed were comprised of data from 58 single country studies and 14 multiple country studies. Not all countries among those listed in the search term for sub-Saharan Africa appeared in the 72 articles we reviewed. Of the 58 single country studies, 20 were from Ethiopia, 12 from Nigeria, 6 studies each from Ghana and South Africa, 2 studies each from Kenya, Zimbabwe, Democratic Republic of the Congo and Somalia, and 1 study each from Mozambique, Zambia, Togo and Cameroon (Table 1). A visual map of all the SSA countries featured in the 72 studies reviewed is presented in Figure 2.

**Table 1: Countries Included in Reviewed Studies**

| <b>Countries</b>                 | <b>Number of studies</b> |
|----------------------------------|--------------------------|
| Ethiopia                         | 20                       |
| Nigeria                          | 12                       |
| Ghana                            | 6                        |
| South Africa                     | 6                        |
| Uganda                           | 2                        |
| Kenya                            | 2                        |
| Zimbabwe                         | 2                        |
| Democratic Republic of the Congo | 2                        |
| Somalia                          | 2                        |
| Mozambique                       | 1                        |
| Zambia                           | 1                        |
| Togo                             | 1                        |
| Cameroon                         | 1                        |
| Multiple country studies*        | 14                       |
| <b>Total</b>                     | <b>72</b>                |

\* Additional SSA countries included in multiple-country studies were Angola, Benin, Burkina Faso, Cape Verde, Côte d'Ivoire, Gambia, Guinea, Guinea-Bissau, Lesotho, Malawi, Mali, Rwanda, São Tomé & Príncipe, Senegal, Sierra Leone, Sudan, and Tanzania.

[Insert Figure 2: Map of Countries Included in Reviewed Studies]

Study populations in the 72 reviewed studies comprised general adult populations (n=28), specific adult populations (n=21) including university students, schoolteachers,



1  
2  
3 chronically ill persons, pregnant women, fully and partially vaccinated adults, mothers,  
4 adult caregivers, and informal traders, and healthcare workers (n=16). Others (n=7)  
5  
6 combined two or more populations segments, for instance, schoolteachers and bank  
7  
8 workers in one study and program personnel, healthcare workers and community  
9  
10 members in another. The main sociodemographic variables captured in the reviewed  
11  
12 studies included age, sex, marital status, ethnicity, education, religion, residence,  
13  
14 employment status, work category, general health status and, in a few instances, chronic  
15  
16 illness status.  
17  
18  
19  
20

### 21 **Operationalization and measurements of vaccine hesitancy, vaccine acceptance,** 22 **and vaccine refusal** 23 24

25  
26 We identified different ways researchers operationalized and measured the outcome  
27  
28 variables of vaccine hesitancy, vaccine acceptance, and vaccine refusal and grouped  
29  
30 them into five categories: (1) measurements of willingness to vaccinate (n=32, 44.4%),  
31  
32 (2) measurements of intention to vaccinate (n=26, 36.1%), (3) multiple measurements  
33  
34 (n=7, 9.7%), (4) uptake measurements (n=4, 5.6%), and (5) qualitative approaches (n=3,  
35  
36 4.2%). We describe these categories in further detail below. We do not provide additional  
37  
38 details on operationalization of the uptake measurement because it is used as a proxy for  
39  
40 measuring assumed COVID-19 vaccine acceptance in these studies<sup>[46-49]</sup>.  
41  
42  
43

#### 44 *Willingness to vaccinate* 45

46  
47 The most frequently occurring operationalization of vaccine hesitancy, acceptance, and  
48  
49 refusal was willingness to vaccinate against COVID-19 (n=32, 44.4%). Among these  
50  
51 studies, 21 included items for which possible responses were “Yes,” “No,” or “Do not  
52  
53 know/Unsure.” For example, Tobin et al. 2021 asked study respondents, “Would you be  
54  
55  
56  
57  
58  
59  
60

1  
2  
3 willing to accept a COVID-19 vaccine when one becomes available in the country?” (p.  
4 54)<sup>[50]</sup>. In six studies, researchers included Likert scale responses, such as Addo et al.  
5  
6 2021 who asked, “How willing are you to take a COVID-19 vaccine?” (p. 5065)<sup>[51]</sup>. In four  
7  
8 studies, researchers added a cost-related condition to the item to measure participants’  
9  
10 willingness to pay for a COVID-19 vaccine. Kanyanda et al. 2021, for instance, asked  
11  
12 participants, “If an approved vaccine to prevent coronavirus was available right now at no  
13  
14 cost, would you agree to be vaccinated?” (p. 2)<sup>[52]</sup>. In one study, researchers asked  
15  
16 participants if they would be willing to take the COVID-19 vaccine if it was recommended  
17  
18 by a health worker or health agency<sup>[53]</sup>.

### 23 24 *Intention to vaccinate*

25  
26 We identified intention to vaccinate as a measurement of vaccine hesitancy, acceptance,  
27  
28 and refusal in 26 (36.1%) of the 72 studies. Among these, 13 included responses for  
29  
30 which possible responses were “Yes,” “No,” or “Do not know/Unsure.” For instance,  
31  
32 Abebe et al. 2021 asked respondents, “Did you have an intention to accept COVID-19  
33  
34 vaccine if it is available in the future?” (p. 2018)<sup>[54]</sup>. In 10 studies, researchers included  
35  
36 Likert scale responses. For example, Wiysonge et al. 2022 asked study participants to  
37  
38 rate their level of agreement on a scale from 1 to 7 (1=strongly disagree, 7=strongly  
39  
40 agree) for the statement “I will take the COVID-19 vaccine when one becomes available”  
41  
42 (p. 3)<sup>[55]</sup>. Researchers included cost-related conditions to measure participants’ intention  
43  
44 to vaccinate in 2 studies, including Mekonnen et al. 2022 who asked, “Are you intending  
45  
46 to get vaccinated against COVID-19 if available without any cost?” (p. 3)<sup>[56]</sup>.

### 51 52 *Multiple measurements*

1  
2  
3 Seven studies (9.7%) included multiple measurements to operationalize vaccine  
4 hesitancy, acceptance, and refusal. Chinawi et al. 2021 measured mothers' willingness  
5 to receive the COVID-19 vaccination as well as their willingness to vaccinate their children  
6 with the COVID-19 vaccine<sup>[57]</sup>. Yilma et al. 2022 asked healthcare workers in Ethiopia if  
7 they would get vaccinated if a COVID-19 vaccine was available and proven safe and  
8 effective, and if they would recommend their patients to get vaccinated for COVID-19<sup>[58]</sup>.  
9  
10 Sallam 2021<sup>33</sup> conducted a concise systematic review of vaccine acceptance rates and  
11 classified acceptance by considering intention to accept, likelihood of vaccination,  
12 willingness to accept a vaccine, endorsement of Oxford Scale<sup>[59]</sup>, and level of agreement  
13 with vaccination acceptance. In a pre-vaccination rollout survey in Ghana, Alhassan et al.  
14  
15 2021 measured respondents' willingness to participate in a COVID-19 vaccine trial and  
16 their willingness to take the vaccine. The three remaining studies used multiple items to  
17 operationalize vaccine sentiment<sup>[60]</sup> and vaccine acceptance<sup>[61 62]</sup> but did not explicitly  
18 describe the procedure in full detail.

### 35 *Qualitative approaches*

36  
37 Three studies (4.7%) employed qualitative approaches. Wonodi et al. 2022 conducted  
38 focus group discussions and key informant interviews to elicit and thematically analyze  
39 COVID-19 vaccine conspiracy theories and misinformation, which they contended may  
40 result in "highly disruptive vaccine hesitancy and refusal" (p. 2115)<sup>[63]</sup>. Shiferie et al. 2021  
41 used WHO's SAGE working group definition of vaccine hesitancy ("delay in acceptance  
42 or refusal of vaccination despite availability of vaccination services" (p. 4163)<sup>[64]</sup>) in their  
43 analysis of 20 qualitative interviews with healthcare providers<sup>[65]</sup>. In their analysis of  
44 documentary, social media and policy analysis, participant observation, ethnography  
45  
46  
47  
48  
49  
50  
51  
52  
53  
54  
55  
56  
57  
58  
59  
60

1  
2  
3 involving informal interviews, and observations, Leach et al. 2022<sup>63</sup> used the Vaccine  
4 Anxieties Framework<sup>[20]</sup> and argued that it allows for “exploration of who, in which  
5 contexts, really does want Covid vaccines, and may be worried about not getting them”  
6  
7  
8  
9  
10 (p. 2).

## 11 **Operationalizations and measurements of access to COVID-19 vaccination**

12  
13  
14 Out of the 72 reviewed studies, 16 (22.2%) included operationalizations of access issues  
15 related to obtaining COVID-19 vaccines. We grouped these operationalizations into 5  
16 categories: (1) measurements of cost and affordability (n=13, 18.1%), (2) measurements  
17 of convenience (n=6, 8.3%), (3) measurements of distance or time to travel or time waiting  
18 for a vaccine (n=3, 4.2%), (4) measurements of comfort (n=1, 1.4%), and (5) qualitative  
19 approaches (n=1, 1.4%). Of these 16 studies, 9 included measurements of access from  
20 more than 1 of these categories.  
21  
22  
23  
24  
25  
26  
27  
28  
29

### 30 *Cost and affordability*

31  
32 For the measurements of cost and affordability category, 8 of the 13 studies included only  
33 a cost and affordability measurement as an operationalization of access. The other 5  
34 included additional access items that fell into the other categories. Some of these cost  
35 and affordability questions were the same questions discussed above in the willingness  
36 and intention to vaccinate measurements (i.e. “If an approved vaccine to prevent  
37 coronavirus was available right now at no cost, would you agree to be vaccinated” (p.  
38 2)<sup>[52]</sup>). Others asked questions about preferences for free vaccines or asked participants  
39 to indicate how much they would be willing to pay for a vaccine. Anjorin et al. 2021, for  
40 example, asked participants to indicate their level of agreement with the following  
41 statement: “If there is a vaccine available for coronavirus, I believe it should be free” (S1  
42  
43  
44  
45  
46  
47  
48  
49  
50  
51  
52  
53  
54  
55  
56  
57  
58  
59  
60

1  
2  
3 File)<sup>[66]</sup>. The same researchers provided the statement, “I consider [----] to be a  
4 reasonable price range for the coronavirus vaccine” to participants and asked them to  
5 choose from the following options: (1) \$1-3, (2) \$4-6, (3) \$7-9, (4)  $\geq$  \$10 (S1 File).  
6  
7

### 8 9 10 *Convenience*

11  
12 We found measurements of convenience as they relate to COVID-19 vaccine acquisition  
13 in 6 studies. Three of these studies asked respondents about general difficulty in  
14 accessing vaccination sites. For instance, Orangi et al. 2021 asked if participants found  
15 vaccination sites hard to access<sup>[67]</sup>. Katoto et al. 2022 conducted a study in South Africa  
16 and asked respondents about their ability to access to the online vaccine registration  
17 platform, which has implications for vaccine access pragmatics<sup>[68]</sup>. Wiysonge et al. 2022  
18 asked participants about their level of agreement with the statement, “For me, it is  
19 inconvenient to receive vaccinations against Covid-19” (p. 3)<sup>[55]</sup>. Anjorin et al. 2021 asked  
20 respondents if they would prefer community workers to come to their house or place of  
21 work to give the coronavirus vaccine, as opposed to going to a health center (S1 File)<sup>[66]</sup>.  
22  
23  
24  
25  
26  
27  
28  
29  
30  
31  
32  
33  
34

### 35 *Distance and time to travel or time waiting for a vaccine*

36  
37 Three studies in total included items about distance/time to travel or time waiting for a  
38 vaccine. Davis et al. 2022 explain how “self-reported distance and waiting times in queue  
39 were used as a means of measuring perceived access to vaccine” (p. 12)<sup>[61]</sup>. Tobin et al.  
40 asked respondents if they were willing to travel for more than one hour to get a COVID-  
41 19 vaccine<sup>[50]</sup>. Anjorin et al. 2021 ask two similar questions about typical travel time to  
42 nearest health centers and the amount of time participants would be willing to travel to  
43 get the coronavirus vaccine<sup>[66]</sup>.  
44  
45  
46  
47  
48  
49  
50  
51  
52

### 53 *Comfort*

1  
2  
3 One study included a question about comfort as a measurement related to COVID-19  
4 vaccine access. Wiysonge et al. 2022 asked participants about their level of agreement  
5 with the statement “Visiting the vaccination clinic will make me feel uncomfortable; this  
6 will keep me from getting vaccinated against Covid-19” (p. 3)<sup>[55]</sup>.  
7  
8  
9

### 10 11 12 *Qualitative approaches*

13  
14 One of the 72 studies included qualitative approaches to operationalize COVID-19  
15 vaccine access. In this study, Leach et al. 2022 posit a link between vaccine-related  
16 anxiety and access to vaccines based on the availability and equity of resources and  
17 observe how the issue of vaccine access is more intricate and unpredictable than  
18 presented in ongoing global debates about vaccination<sup>[69]</sup>.  
19  
20  
21  
22  
23  
24  
25

### 26 **Identified gaps**

27  
28 The results of this scoping review allowed us to identify gaps in the current research on  
29 COVID-19 vaccine hesitancy, vaccine acceptance, vaccine refusal, and vaccine access  
30 in sub-Saharan Africa. We have identified three main gaps in this research: (1) a small  
31 proportion of studies investigating issues of COVID-19 vaccine access as a determinant  
32 of vaccine uptake, (2) a lack of standardized, homogeneous approaches to measuring  
33 COVID-19 vaccine hesitancy, vaccine acceptance, vaccine refusal, and vaccine access,  
34 and (3) a lack of country-wide representative studies.  
35  
36  
37  
38  
39  
40  
41  
42  
43

44 A major gap in the literature became apparent when we considered the surprisingly low  
45 number of studies (n=16, 22.2%) that included study items aimed at measuring COVID-  
46 19 vaccine access. Almost all studies included measurements related to cost and  
47 affordability of the vaccine, while very few considered obstacles individuals might face as  
48 barriers to receiving a COVID-19 vaccine, such as accessing online vaccine registration  
49  
50  
51  
52  
53  
54  
55  
56  
57  
58  
59  
60

1  
2  
3 platforms, travel distance and waiting times to reach vaccination centers or sites, and  
4  
5 comfort when visiting vaccination clinics.  
6

7  
8 We also identified heterogeneous research approaches to measuring vaccine hesitancy,  
9  
10 acceptance, refusal, and uptake. The variety of approaches used by researchers  
11  
12 throughout SSA likely reflects the difficulties involved when attempting to operationalize  
13  
14 admittedly complex phenomena. Similarly, the use of a variety of tools and measurements  
15  
16 renders cross-country comparison challenging.  
17  
18

19 Results of this scoping review also showed that there were relatively few studies that  
20  
21 provided country-wide, representative results. Rather, many studies were institution-  
22  
23 based, convenience samples or included non-random samples via questionnaires  
24  
25 conducted online.  
26  
27  
28  
29

## 30 31 **DISCUSSION**

32  
33 Research on COVID-19 vaccine hesitancy, acceptance, refusal, and uptake in sub-  
34  
35 Saharan Africa has been heterogeneous in terms of study sample populations, study  
36  
37 settings, study designs, and measurement tools. This is not surprising given the fast-  
38  
39 changing nature of the COVID-19 pandemic. This was also coupled with the urgent and  
40  
41 complex mass vaccination rollout efforts designed to immunize the highest number of  
42  
43 eligible individuals possible in resource-limited settings. This scoping review has  
44  
45 described the diversity of this research and showed a considerable amount of research  
46  
47 about COVID-19 vaccine hesitancy, acceptance, and refusal. Nonetheless, few of these  
48  
49 studies have included explicit measurements of access to COVID-19 vaccination.  
50  
51  
52  
53  
54  
55  
56  
57  
58  
59  
60

1  
2  
3 Some of the above-mentioned gaps are likely a result, in part, of the reviewed studies'  
4 overall limited engagement with and use of research tools and measurement scales which  
5 pre-dated the COVID-19 pandemic. Further consideration of these sources in the study  
6 design process would likely have allowed researchers to address some of these gaps.  
7

8  
9  
10 Several studies did nonetheless adapt literature and models pre-existing the COVID-19  
11 pandemic for use in the context of COVID-19 vaccination. Anjorin et al. 2021<sup>[66]</sup>, for  
12 example, referenced a 2014 WHO Strategic Advisory Group of Experts on Immunization  
13 (SAGE) report<sup>[70]</sup>, describing the “3Cs Model” which includes the concepts of *confidence*,  
14 *complacency*, and *convenience*. Anjorin et al. 2021’s utilization of the 3Cs model likely  
15 prompted them to include items designed to measure variables related to COVID-19  
16 vaccine access, notably through use of the concept *convenience*.  
17

18  
19 [Wiysonge, et al. <sup>55]</sup> explicitly stated that their study questionnaire was informed by the  
20 5C scale from Betsch et al. 2018 <sup>[71]</sup>, which is an adaptation of SAGE’s 3Cs model. The  
21 5C scale measures five psychological antecedents of vaccination: *confidence*,  
22 *complacency*, *constraints*, *rational calculations of pros and cons*, and *collective*  
23 *responsibility*. Wiysonge et al.’s use of the 5C scale allowed the researchers to include  
24 questions related to intention to vaccinate against COVID-19, convenience of getting  
25 vaccinated, and comfort in going to vaccination clinics, -. It is notable that there is also  
26 now a 7C model that additionally includes measurements of *compliance* and  
27 *conspiracy*<sup>[72]</sup>.  
28

29  
30  
31 Katoto et al. 2022 used the WHO and United Nations Children’s Fund (UNICEF)’s  
32 Behavioral Social Drivers of COVID-19 vaccination (BeSD) tool<sup>[73]</sup> to inform the  
33 development of data collection tools for their study. The BeSD tool assesses four domains  
34  
35  
36  
37  
38  
39  
40  
41  
42  
43  
44  
45  
46  
47  
48  
49  
50  
51  
52  
53  
54  
55  
56  
57  
58  
59  
60



1  
2  
3 related to vaccine uptake: (1) what people think and feel about vaccinations, (2) social  
4 processes promoting or hindering vaccination, (3) individual motivations to seek  
5 vaccination, and (4) practical elements involved in obtaining and getting immunization.  
6  
7  
8  
9  
10 Katoto et al. 2022 noted that the BeSD has limited use in LMICs, which prompted the  
11 research team to extensively adapt the tool for the South African context. Nonetheless,  
12 use of the BeSD tool in the study design facilitated the inclusion of an item related to  
13 practical elements involved in obtaining and getting immunization: access to the online  
14 vaccine registration platform.  
15  
16  
17  
18  
19  
20

21 Regarding our study objective to identify, describe, and map research measurement tools  
22 COVID-19 vaccine hesitancy, refusal, and acceptance and COVID-19 vaccine access in  
23 sub-Saharan Africa, our results show that all 72 reviewed studies included measurements  
24 of vaccine hesitancy, refusal, and/or acceptance. However, only 16 (22%) studies  
25 included at least one measurement of COVID-19 vaccine access. This important finding  
26 aligns with a trend developed during the COVID-19 pandemic whereby journalists,  
27 governments, policymakers, and researchers have increasingly used ‘vaccine hesitancy’  
28 as an explanation for why so many people remain unvaccinated, even in contexts where  
29 there are inadequate vaccine supplies or difficulties accessing vaccination services<sup>[74]</sup>. In  
30 effect, Attwell et al. 2022 observed that papers mentioning ‘vaccine’ or ‘vaccination’ in the  
31 title, as well as ‘hesitancy,’ increased from 3.3% in 2019 to 8.31% in 2021 (p.574). These  
32 authors argue that this increased focus on vaccine hesitancy “lets governments off the  
33 hook” by centering “too much of the responsibility for the success (or not) of a vaccination  
34 programme on individuals” (ibid).  
35  
36  
37  
38  
39  
40  
41  
42  
43  
44  
45  
46  
47  
48  
49  
50  
51  
52  
53  
54  
55  
56  
57  
58  
59  
60

1  
2  
3 Our search strategy has limitations. Our decision not to include grey literature, such as  
4 conference proceedings, reports, opinion pieces, and commentaries, and non-English  
5 texts in our review may have limited the available data. There may have been other  
6 measurements of vaccine hesitancy, refusal, or acceptance around COVID-19 vaccine in  
7 sub-Saharan Africa reported in the excluded literature and in languages other than  
8 English. It should also be noted that the search was conducted in March 2022, so there  
9 are likely additional publications that have become available since we conducted the  
10 scoping review.  
11  
12  
13  
14  
15  
16  
17  
18  
19  
20

21 Future research on COVID-19 vaccination in sub-Saharan Africa, and other LMIC settings  
22 for that matter, needs to prioritize the inclusion of access-related measurements.  
23  
24 Inclusion of access variables in future research will add an essential factor to the complex  
25 equation around determinants of vaccine uptake. More importantly, its inclusion will fill a  
26 current empirical blind spot around COVID-19 vaccine research in sub-Saharan Africa  
27 whose results have potential to provide insights into concrete, pragmatic, and actionable  
28 changes designed to make it easier for individuals to obtain COVID-19 vaccines.  
29  
30  
31  
32  
33  
34  
35  
36

## 37 **CONCLUSION**

38  
39  
40 This scoping review has described the heterogeneity in 72 reviewed studies about  
41 COVID-19 vaccine hesitancy, acceptance, refusal, and access in sub-Saharan Africa.  
42  
43 This heterogeneity was apparent in the distribution of countries included, the study  
44 designs, sample populations, measurements of vaccine hesitancy, acceptance, refusal,  
45 uptake, and access. Particularly, we have identified an important empirical blind spot in  
46 the literature regarding measurements of vaccine access. Future measurement tools can  
47 find inspiration from pre-existing scales, tools, and models used for the study of the  
48  
49  
50  
51  
52  
53  
54  
55  
56  
57  
58  
59  
60

1  
2  
3 determinants of vaccine uptake<sup>[64 70 71 73]</sup>, as was demonstrated in several of the 72 studies  
4  
5 reviewed in this scoping review. These research tools should nonetheless be adaptable  
6  
7 to capture the local realities specific to the diverse contexts represented in sub-Saharan  
8  
9 Africa and other LMICs.  
10  
11  
12  
13

14 **Acknowledgments** We would like to acknowledge the financial supported received from  
15  
16 the Leading House Africa Research Partnership Grant I and from the Swiss National  
17  
18 Science Foundation's sponsorship of MJD's Early Postdoc.Mobility Fellowship (Grant:  
19  
20 200180). We would like to thank Nahmla Madini who provided invaluable assistance and  
21  
22 support through her role as a librarian at the University of Cape Town's Bongani Mayosi  
23  
24 Health Sciences Library. Finally, we would like to thank Vladimir Jolidon and Lucia Knight  
25  
26 for their valuable inputs for revisions of the scoping review.  
27  
28  
29

### 30 **Collaborators**

31  
32 Vladimir Jolidon

33  
34 Lucia Knight

### 35 **Contributorship statement**

36  
37 Study authors MJD and JG worked together in sourcing funding for this project,  
38  
39 conceptualizing and designing the study, data collection and analysis, preparation, review  
40  
41 and editing the manuscript. Both authors read and approved the final version of the  
42  
43 manuscript for submission.  
44  
45  
46  
47  
48

49 **Funding** This work was supported by the Leading House Africa Research Partnership  
50  
51 Grant I and by the Swiss National Science Foundation's sponsorship of MJD's Early  
52  
53 Postdoc.Mobility Fellowship (Grant: 200180).  
54  
55  
56  
57  
58  
59

1  
2  
3 **Competing interests** None to declare.  
4

5 **Patient consent for publication** Patients were not involved in this study.  
6

7 **Ethics approval** This study was based entirely on a scoping review of relevant  
8  
9 published literature and did not require an ethics approval.  
10

11 **Provenance and peer review** Not commissioned. Externally peer reviewed.  
12

13 **Data availability statement** Data supporting the findings of this study are available from  
14  
15 the corresponding author (MJD) on request.  
16

17 **Supplementary material** The document “Supplementary file 1” provides an overview of  
18  
19 the final search strategy. The document “Supplementary file 2” includes a list of the 72  
20  
21 studies reviewed in the scoping review.  
22  
23  
24

## 25 26 REFERENCES

- 27 1. WHO. Ten threats to global health in 2019 2019 [Available from:  
28 <https://www.who.int/emergencies/ten-threats-to-global-health-in-2019> accessed  
29 February 18, 2019 2019.  
30
- 31 2. Larson H, Jarrett C, Eckersberger E, et al. Understanding vaccine hesitancy around vaccines  
32 and vaccination from a global perspective: A systematic review of published literature,  
33 2007–2012. *Vaccine* 2014;32 doi: 10.1016/j.vaccine.2014.01.081  
34
- 35 3. Bedford H, Attwell K, Danchin M, et al. Vaccine hesitancy, refusal and access barriers: The  
36 need for clarity in terminology. *Vaccine* 2018;36(44):6556-58. doi:  
37 <https://doi.org/10.1016/j.vaccine.2017.08.004>  
38
- 39 4. Reich JA. Neoliberal Parenting, Future Sexual Citizens, and Vaccines Against Sexual Risk.  
40 *Sexuality Research and Social Policy* 2016;13(4):341-55. doi: 10.1007/s13178-016-0227-z  
41
- 42 5. Reich JA. *Calling the Shots: Why Parents Reject Vaccines*. New York: New York University  
43 Press 2016.  
44
- 45 6. Reich JA. Neoliberal Mothering and Vaccine Refusal: Imagined Gated Communities and the  
46 Privilege of Choice. *Gender & Society* 2014;28(5):679-704. doi:  
47 10.1177/0891243214532711  
48
- 49 7. Sobo EJ. Social Cultivation of Vaccine Refusal and Delay among Waldorf (Steiner) School  
50 Parents. *Medical Anthropology Quarterly* 2015;29(3):381-99. doi: 10.1111/maq.12214  
51
- 52 8. Sobo EJ. Salutogenic Education? Movement and Whole Child Health in a Waldorf (Steiner)  
53 School. *Medical Anthropology Quarterly* 2015;29(2):137-56. doi: 10.1111/maq.12140  
54
- 55 9. Sobo EJ. THEORIZING (VACCINE) REFUSAL: Through the Looking Glass. *Cultural Anthropology*  
56 2016;31(3):342-50. doi: 10.14506/ca31.3.04  
57  
58  
59

10. Sobo EJ, Huhn A, Sannwald A, et al. Information Curation among Vaccine Cautious Parents: Web 2.0, Pinterest Thinking, and Pediatric Vaccination Choice. *Medical Anthropology* 2016;35(6):529-46. doi: 10.1080/01459740.2016.1145219
11. Ward PR, Attwell K, Meyer SB, et al. Understanding the perceived logic of care by vaccine-hesitant and vaccine-refusing parents: A qualitative study in Australia. *PloS one* 2017;12(10):e0185955-e55. doi: 10.1371/journal.pone.0185955
12. Attwell K, Meyer SB, Ward PR. The Social Basis of Vaccine Questioning and Refusal: A Qualitative Study Employing Bourdieu's Concepts of 'Capitals' and 'Habitus'. *International journal of environmental research and public health* 2018;15(5):1044. doi: 10.3390/ijerph15051044
13. Attwell K, Smith DT, Ward PR. 'The Unhealthy Other': How vaccine rejecting parents construct the vaccinating mainstream. *Vaccine* 2018;36(12):1621-26. doi: <https://doi.org/10.1016/j.vaccine.2018.01.076>
14. Attwell K, Ward PR, Meyer SB, et al. "Do-it-yourself": Vaccine rejection and complementary and alternative medicine (CAM). *Social Science & Medicine* 2018;196:106-14. doi: <https://doi.org/10.1016/j.socscimed.2017.11.022>
15. Deml MJ, Buhl A, Huber BM, et al. Trust, affect, and choice in parents' vaccination decision-making and health-care provider selection in Switzerland. *Sociology of Health & Illness* 2021;n/a:1-18. doi: <https://doi.org/10.1111/1467-9566.13388>
16. Deml MJ, Buhl A, Notter J, et al. 'Problem patients and physicians' failures': What it means for doctors to counsel vaccine hesitant patients in Switzerland. *Social Science & Medicine* 2020;255:112946. doi: <https://doi.org/10.1016/j.socscimed.2020.112946>
17. Deml MJ, Jafflin K, Merten S, et al. Determinants of vaccine hesitancy in Switzerland: study protocol of a mixed-methods national research programme. *BMJ Open* 2019;9(11):e032218. doi: 10.1136/bmjopen-2019-032218
18. Ebi SJ, Deml MJ, Jafflin K, et al. Parents' vaccination information seeking, satisfaction with and trust in medical providers in Switzerland: a mixed-methods study. *BMJ Open* 2022;12(2):e053267. doi: 10.1136/bmjopen-2021-053267
19. Benin AL, Wisler-Scher DJ, Colson E, et al. Qualitative analysis of mothers' decision-making about vaccines for infants: the importance of trust. *American Academy of Pediatrics* 2006;117(5):1532-41.
20. Leach M, Fairhead J. *Vaccine Anxieties: Global Science, Child Health and Society*. Oxfordshire: Routledge 2007:216.
21. Larson H. *Stuck: How Vaccine Rumors Start—and Why They Don't Go Away*. Seattle: Oxford University Press 2020:184.
22. Agyepong IA, Sewankambo N, Binagwaho A, et al. The path to longer and healthier lives for all Africans by 2030: the Lancet Commission on the future of health in sub-Saharan Africa. *The Lancet* 2017;390(10114):2803-59.
23. Mash R, Howe A, Olayemi O, et al. Reflections on family medicine and primary healthcare in sub-Saharan Africa: *BMJ Specialist Journals*, 2018.
24. TheEconomist. *The future of healthcare in Africa*: Health Systems Trust, 2011.
25. Falchetta G, Hammad AT, Shayegh S. Planning universal accessibility to public health care in sub-Saharan Africa. *Proceedings of the National Academy of Sciences* 2020;117(50):31760-69.

- 1
- 2
- 3
- 4 26. Streefland P. Public health care under pressure in sub-Saharan Africa. *Health Policy*
- 5 2005;71(3):375-82.
- 6 27. Whyle E, Olivier J. Models of engagement between the state and the faith sector in sub-
- 7 Saharan Africa—a systematic review. *Development in Practice* 2017;27(5):684-97.
- 8 28. Dzinamarira T, Nachipo B, Phiri B, et al. COVID-19 vaccine roll-out in South Africa and
- 9 Zimbabwe: urgent need to address community preparedness, fears and hesitancy.
- 10 *Vaccines* 2021;9(3):250.
- 11 29. Hartwig R, Hoffmann L. Challenging Trust in Government: COVID in Sub-Saharan Africa.
- 12 2021
- 13 30. Jiwani SS, Antiporta DA. Inequalities in access to water and soap matter for the COVID-19
- 14 response in sub-Saharan Africa. *International journal for equity in health* 2020;19:1-3.
- 15 31. Powell A. Rural COVID, urban COVID. Africa sees sharp divide. *Voice of America News Online*
- 16 2021 21 March 2021.
- 17 32. Basak P, Abir T, Al Mamun A, et al. A Global Study on the Correlates of Gross Domestic
- 18 Product (GDP) and COVID-19 Vaccine Distribution. *Vaccines* 2022;10(2) doi:
- 19 10.3390/vaccines10020266
- 20 33. Sallam M. COVID-19 vaccine hesitancy worldwide: a concise systematic review of vaccine
- 21 acceptance rates. *Vaccines* 2021;9(2):160.
- 22 34. Acheampong T, Akorsikumah EA, Osaе-Kwapong J, et al. Examining Vaccine Hesitancy in
- 23 Sub-Saharan Africa: A Survey of the Knowledge and Attitudes among Adults to Receive
- 24 COVID-19 Vaccines in Ghana. *Vaccines* 2021;9(8):814.
- 25 35. Dinga JN, Sinda LK, Titanji VP. Assessment of vaccine hesitancy to a COVID-19 vaccine in
- 26 Cameroonian adults and its global implication. *Vaccines* 2021;9(2):175.
- 27 36. Tulloch O, Roldan de Jong T, Bardosh K. Data Synthesis: COVID-19 Vaccine Perceptions in
- 28 Sub-Saharan Africa: Social and Behavioural Science Data, March 2020-April 2021. 2021
- 29 37. Nachega JB, Sam-Agudu NA, Masekela R, et al. Addressing challenges to rolling out COVID-
- 30 19 vaccines in African countries. *Lancet Glob Health* 2021;9(6):e746-e48. doi:
- 31 10.1016/s2214-109x(21)00097-8 [published Online First: 2021/03/14]
- 32 38. Sallam M, Al-Sanafi M, Sallam M. A Global Map of COVID-19 Vaccine Acceptance Rates per
- 33 Country: An Updated Concise Narrative Review. *J Multidiscip Healthc* 2022;15:21-45.
- 34 doi: 10.2147/jmdh.S347669 [published Online First: 2022/01/21]
- 35 39. NYTimes. Tracking Coronavirus Vaccinations Around the World 2022 [Available from:
- 36 <https://www.nytimes.com/interactive/2021/world/covid-vaccinations-tracker.html>
- 37 accessed August 18, 2022.
- 38 40. Levac D, Colquhoun H, O'Brien KK. Scoping studies: advancing the methodology.
- 39 *Implementation Science* 2010;5(1):69. doi: 10.1186/1748-5908-5-69
- 40 41. Arksey H, O'Malley L. Scoping studies: towards a methodological framework. *International*
- 41 *Journal of Social Research Methodology* 2005;8(1):19-32. doi:
- 42 10.1080/1364557032000119616
- 43 42. MDJ P, C M, AC T, et al. Updated methodological guidance for the conduct of scoping
- 44 reviews: JBI evidence implementation 2021:3-10.
- 45 43. Peters MD, Godfrey C, Mclnerney P, et al. Chapter 11: Scoping reviews. In: Aromataris E MZ,
- 46 ed. *JBI Manual for Evidence Synthesis*: JBI 2020.
- 47
- 48
- 49
- 50
- 51
- 52
- 53
- 54
- 55
- 56
- 57
- 58
- 59
- 60

- 1
- 2
- 3
- 4 44. Page MJ, McKenzie JE, Bossuyt PM, et al. The PRISMA 2020 statement: an updated guideline
- 5 for reporting systematic reviews. *BMJ* 2021;372:n71. doi: 10.1136/bmj.n71
- 6 45. Tricco AC, Lillie E, Zarin W, et al. PRISMA Extension for Scoping Reviews (PRISMA-ScR):
- 7 Checklist and Explanation. *Annals of Internal Medicine* 2018;169(7):467-73. doi:
- 8 10.7326/M18-0850
- 9 46. Al-Mustapha AI, Abubakar MI, Oyewo M, et al. Socio-Demographic Characteristics of COVID-
- 10 19 Vaccine Recipients in Kwara State, North Central Nigeria. *Frontiers in Public Health*
- 11 2022;9 doi: 10.3389/fpubh.2021.773998
- 12 47. Rikitu Terefa D, Shama AT, Feyisa BR, et al. COVID-19 Vaccine Uptake and Associated
- 13 Factors Among Health Professionals in Ethiopia. *Infection and drug resistance*
- 14 2021;14:5531-41. doi: 10.2147/IDR.S344647
- 15 48. Murewanhema G, Burukai TV, Chireka B, et al. Implementing national COVID-19 vaccination
- 16 programmes in sub-Saharan Africa- early lessons from Zimbabwe: a descriptive cross-
- 17 sectional study. *Pan Afr Med J* 2021;40:180. doi: 10.11604/pamj.2021.40.180.30824
- 18 [published Online First: 2022/01/13]
- 19 49. Agha S, Chine A, Lalika M, et al. Drivers of COVID-19 Vaccine Uptake amongst Healthcare
- 20 Workers (HCWs) in Nigeria. *Vaccines* 2021;9(10) doi: 10.3390/vaccines9101162
- 21 50. Tobin EA, Okonofua M, Adeke A, et al. Willingness to accept a COVID-19 vaccine in Nigeria:
- 22 a population-based cross-sectional study. *Cent Afr J Public Health* 2021;7(2):53.
- 23 51. Addo PC, Kulbo NB, Sagoe KA, et al. Guarding against COVID-19 vaccine hesitance in Ghana:
- 24 analytic view of personal health engagement and vaccine related attitude. *Hum Vaccin*
- 25 *Immunother* 2021;17(12):5063-68. doi: 10.1080/21645515.2021.2008729 [published
- 26 Online First: 2021/12/15]
- 27 52. Kanyanda S, Markhof Y, Wollburg P, et al. Acceptance of COVID-19 vaccines in sub-Saharan
- 28 Africa: evidence from six national phone surveys. *BMJ Open* 2021;11(12):e055159. doi:
- 29 10.1136/bmjopen-2021-055159 [published Online First: 2021/12/17]
- 30 53. Eze UA, Ndoh KI, Ibisola BA, et al. Determinants for Acceptance of COVID-19 Vaccine in
- 31 Nigeria. *Cureus* 2021;13(11):e19801. doi: 10.7759/cureus.19801
- 32 54. Abebe H, Shitu S, Mose A. Understanding of COVID-19 vaccine knowledge, attitude,
- 33 acceptance, and determinates of COVID-19 vaccine acceptance among adult population
- 34 in Ethiopia. *Infection and drug resistance* 2021;14:2015.
- 35 55. Wiysonge CS, Alobwede SM, Katoto PDC, et al. COVID-19 vaccine acceptance and hesitancy
- 36 among healthcare workers in South Africa. *Expert Review of Vaccines* 2022 doi:
- 37 10.1080/14760584.2022.2023355
- 38 56. Kassa Mekonnen C, Gizaw Demissie N, Wako Beko Z, et al. Intent to get vaccinated against
- 39 COVID-19 pandemic and its associated factors among adults with a chronic medical
- 40 condition. *Int J Afr Nurs Sci* 2022;16:100401. doi: 10.1016/j.ijans.2022.100401
- 41 [published Online First: 2022/03/01]
- 42 57. Chinawa AT, Chinawa JM, Ossai EN, et al. Maternal level of awareness and predictors of
- 43 willingness to vaccinate children against COVID 19; A multi-center study. *Human*
- 44 *Vaccines and Immunotherapeutics* 2021;17(11):3982-88. doi:
- 45 10.1080/21645515.2021.1963172
- 46
- 47
- 48
- 49
- 50
- 51
- 52
- 53
- 54
- 55
- 56
- 57
- 58
- 59
- 60



- 1
- 2
- 3
- 4 58. Yilma D, Mohammed R, Getahun Abdela S, et al. COVID-19 vaccine acceptability among
- 5 health care workers in Ethiopia: Do we practice what we preach? *Trop Med Int Health*
- 6 2022 doi: 10.1111/tmi.13742 [published Online First: 2022/03/02]
- 7 59. Daley MF, Narwaney KJ, Shoup JA, et al. Addressing Parents' Vaccine Concerns: A
- 8 Randomized Trial of a Social Media Intervention. *American Journal of Preventive*
- 9 *Medicine* 2018;55(1):44-54. doi: <https://doi.org/10.1016/j.amepre.2018.04.010>
- 10 60. Ansari MTJ, Khan NA. Worldwide COVID-19 vaccines sentiment analysis through twitter
- 11 content. *Electronic Journal of General Medicine* 2021;18(6) doi: 10.29333/ejgm/11316
- 12 61. Davis TP, Jr., Yimam AK, Kalam MA, et al. Behavioural Determinants of COVID-19-Vaccine
- 13 Acceptance in Rural Areas of Six Lower- and Middle-Income Countries. *Vaccines*
- 14 2022;10(2) doi: 10.3390/vaccines10020214
- 15 62. Alle YF, Oumer KE. Attitude and associated factors of COVID-19 vaccine acceptance among
- 16 health professionals in Debre Tabor Comprehensive Specialized Hospital, North Central
- 17 Ethiopia; 2021: cross-sectional study. *Virusdisease* 2021;32(2):272-78.
- 18 63. Wonodi C, Obi-Jeff C, Adewumi F, et al. Conspiracy theories and misinformation about
- 19 COVID-19 in Nigeria: Implications for vaccine demand generation communications.
- 20 *Vaccine* 2022 doi: 10.1016/j.vaccine.2022.02.005
- 21 64. MacDonald NE. Vaccine hesitancy: Definition, scope and determinants. *Vaccine*
- 22 2015;33(34):4161-64. doi: <https://doi.org/10.1016/j.vaccine.2015.04.036>
- 23 65. Shiferie F, Sada O, Fenta T, et al. Exploring reasons for COVID-19 vaccine hesitancy among
- 24 healthcare providers in Ethiopia. *Pan Afr Med J* 2021;40:213. doi:
- 25 10.11604/pamj.2021.40.213.30699 [published Online First: 2022/02/10]
- 26 66. Anjorin AA, Odetokun IA, Abioye AI, et al. Will Africans take COVID-19 vaccination? *PLoS*
- 27 *ONE* 2021;16(12):1-15. doi: 10.1371/journal.pone.0260575
- 28 67. Orangi S, Pinchoff J, Mwangi D, et al. Assessing the Level and Determinants of COVID-19
- 29 Vaccine Confidence in Kenya. *Vaccines* 2021;9(8) doi: 10.3390/vaccines9080936
- 30 68. Katoto PDMC, Parker S, Coulson N, et al. Predictors of COVID-19 Vaccine Hesitancy in South
- 31 African Local Communities: The VaxScenes Study. *Vaccines* 2022;10(3):353.
- 32 69. Leach M, MacGregor H, Akello G, et al. Vaccine anxieties, vaccine preparedness:
- 33 Perspectives from Africa in a Covid-19 era. *Social Science & Medicine* 2022;298:114826.
- 34 doi: 10.1016/j.socscimed.2022.114826
- 35 70. WHO. Report of the SAGE Working Group on Vaccine Hesitancy, 2014.
- 36 71. Betsch C, Schmid P, Heinemeier D, et al. Beyond confidence: Development of a measure
- 37 assessing the 5C psychological antecedents of vaccination. *PLOS ONE*
- 38 2018;13(12):e0208601.
- 39 72. Geiger M, Rees F, Lilleholt L, et al. Measuring the 7Cs of Vaccination Readiness. *European*
- 40 *Journal of Psychological Assessment* 2021;38(4):261-69. doi: 10.1027/1015-
- 41 5759/a000663
- 42 73. WHO, UNICEF. Data for action: achieving high uptake of COVID-19 vaccines: gathering and
- 43 using data on the behavioural and social drivers of vaccination: a guidebook for
- 44 immunization programmes and implementing partners: interim guidance, 3 February
- 45 2021 2021 [Available from: <https://apps.who.int/iris/handle/10665/339452> accessed
- 46 June 05, 2022.
- 47
- 48
- 49
- 50
- 51
- 52
- 53
- 54
- 55
- 56
- 57
- 58
- 59
- 60



1  
2  
3 74. Attwell K, Hannah A, Leask J. COVID-19: talk of 'vaccine hesitancy' lets governments off the  
4 hook. *Nature* 2022;602:574-77.  
5  
6  
7

8 Figure Legend/Caption:  
9

10 Figure 1: PRISMA Flow Diagram  
11

12 Figure 2: Map of Countries Included in Reviewed Studies  
13  
14  
15  
16  
17  
18  
19  
20  
21  
22  
23  
24  
25  
26  
27  
28  
29  
30  
31  
32  
33  
34  
35  
36  
37  
38  
39  
40  
41  
42  
43  
44  
45  
46  
47  
48  
49  
50  
51  
52  
53  
54  
55  
56  
57  
58  
59  
60



PRISMA Flow Diagram

260x273mm (72 x 72 DPI)



Countries Featured in Reviewed Studies

274x245mm (72 x 72 DPI)

## Supplementary file 1

The final search strategy was performed in PubMed, Scopus, Web of Science, Cochrane, Academic Search Premier, MEDLINE, Cumulative Index to Nursing and Allied Health Literature (CINAHL), Health Source Nursing, Africa Wide and APA PsychInfo on March 9, 2022, with the following search terms, where appropriate. We did not use any filters or limits in the search strategy to maximize the articles available to us.

COVID-19 Vaccines OR COVID-19 OR Coronavirus [Mesh]

"COVID-19" OR "coronavirus 2019" OR "SARS-CoV-2" OR "SARS-2" OR "severe acute respiratory syndrome coronavirus 2"

Vaccination Refusal [Mesh]

vaccination hesitancy OR vaccine hesitancy OR vaccine refusal OR vaccination refusal OR vaccine access OR access

Africa South of the Sahara [MeSH]

"Angola" OR "Benin" OR "Botswana" OR "Burkina Faso" OR "Burundi" OR "Cabo Verde" OR "Cameroon" OR "Cameroun" OR "Canary Islands" OR "Cape Verde" OR "Central Africa" OR "Central African Republic" OR "Chad" OR "Comoros" OR "Congo" OR "Cote d'Ivoire" OR "Democratic Republic of Congo" OR "Djibouti" OR "Eastern Africa" OR "Eritrea" OR "eSwatini" OR "Ethiopia" OR "Gabon" OR "Gambia" OR "Ghana" OR "Guinea" OR "Guinea-Bissau" OR "Ivory Coast" OR "Jamahiriya" OR "Kenya" OR "Lesotho" OR "Liberia" OR "Madagascar" OR "Malawi" OR "Mali" OR "Mauritania" OR "Mauritius" OR "Mayotte" OR "Mozambique" OR "Namibia" OR "Niger" OR "Nigeria" OR "Principe" OR "Reunion" OR "Rwanda" OR "Sao Tome" OR "Senegal" OR "Seychelles" OR "Sierra Leone" OR "Saint Helena" OR "Somalia" OR "St Helena" OR "South Africa" OR "Southern Africa" OR "Sudan" OR "Swaziland" OR "Tanzania" OR "Togo" OR "Uganda" OR "Western Africa" OR "Western Sahara" OR "Zaire" OR "Zambia" OR "Zimbabwe"

| Year | Author(s)                                                                                                                                                                                                                                                                                                                                          | Title                                                                                                                 | Journal                          | Abstract                                                                                                                                                                                                                                                                                                                                                                                                                                                                                                                                                                                                                                                                                                                                                                                                                                                                                                                                                                                                                                                                                                                                                                                                                                                                                                                                                                                                                                                                                                                                                                                                                                                                                                                                                                                                                                                                                                                                                                                                                                                                                                                                                                                                                                                                                                               |
|------|----------------------------------------------------------------------------------------------------------------------------------------------------------------------------------------------------------------------------------------------------------------------------------------------------------------------------------------------------|-----------------------------------------------------------------------------------------------------------------------|----------------------------------|------------------------------------------------------------------------------------------------------------------------------------------------------------------------------------------------------------------------------------------------------------------------------------------------------------------------------------------------------------------------------------------------------------------------------------------------------------------------------------------------------------------------------------------------------------------------------------------------------------------------------------------------------------------------------------------------------------------------------------------------------------------------------------------------------------------------------------------------------------------------------------------------------------------------------------------------------------------------------------------------------------------------------------------------------------------------------------------------------------------------------------------------------------------------------------------------------------------------------------------------------------------------------------------------------------------------------------------------------------------------------------------------------------------------------------------------------------------------------------------------------------------------------------------------------------------------------------------------------------------------------------------------------------------------------------------------------------------------------------------------------------------------------------------------------------------------------------------------------------------------------------------------------------------------------------------------------------------------------------------------------------------------------------------------------------------------------------------------------------------------------------------------------------------------------------------------------------------------------------------------------------------------------------------------------------------------|
| 2021 | Á F. L. de Sousa, J. R. B. Teixeira, I. Lua, F. O. Souza, A. J. F. Ferreira, G. Schneider, H. E. F. de Carvalho, L. B. de Oliveira, S. V. M. A. Lima, A. R. de Sousa, T. M. E. de Araújo, E. L. S. Camargo, M. O. B. Oriá, I. Craveiro, T. M. de Araújo, I. A. C. Mendes, C. A. A. Ventura, I. Sousa, R. M. de Oliveira, M. Simão and I. Fronteira | Determinants of COVID-19 vaccine hesitancy in portuguese-speaking countries: A structural equations modeling approach | Vaccines                         | COVID-19 vaccine hesitancy (VH) has caused concerns due to the possible fluctuations that may occur directly impacting the control of the pandemic. In this study, we aimed to estimate the prevalence and factors associated with COVID-19 VH in Portuguese-speaking countries. We developed a web survey (N:6,843) using an online, structured, and validated questionnaire. We used Measurement Models, Exploratory Factor Analysis, Exploratory Structural Equation Models, and Confirmatory Factor Analysis for the data analysis. The overall prevalence of COVID-19 VH in Portuguese-speaking countries was 21.1%. showed a statistically significant direct effect for VH: vaccine-related conspiracy beliefs (VB) ( $\beta = 0.886$ ), perceived stress (PS) ( $\beta = 0.313$ ), COVID-19 Misinformation (MIS) ( $\beta = 0.259$ ) and individual responses to COVID-19 (CIR) ( $\beta = -0.122$ ). The effect of MIS and CIR for VH was greater among men and of PS and VB among women; the effect of PS was greater among the youngest and of VB and CIR among the oldest. No discrepant differences were identified in the analyzed education strata. In conclusion, we found that conspiracy beliefs related to the vaccine strongly influence the decision to hesitate (not to take or to delay the vaccine). Specific characteristics related to gender, age group, social and cognitive vulnerabilities, added to the knowledge acquired, poorly substantiated and/or misrepresented about the COVID-19 vaccine, need to be considered in the planning of vaccination campaigns. It is necessary to respond in a timely, fast, and accurate manner to the challenges posed by vaccine hesitancy. © 2021 by the authors. Licensee MDPI, Basel, Switzerland.                                                                                                                                                                                                                                                                                                                                                                                                                                                                                                                                            |
| 2021 | A. A. Shamsirsaz, K. Hessami, S. Morain, Y. Afshar, A. A. Nassr, S. E. Arian, N. M. Asl and K. Agaard                                                                                                                                                                                                                                              | Intention to Receive COVID-19 Vaccine during Pregnancy: A Systematic Review and Meta-analysis                         | American Journal of Perinatology | Objective This meta-analysis aimed to assess the level of intent to receive coronavirus disease 2019 (COVID-19) vaccination and demographical factors influencing vaccine uptake among pregnant individuals. Study Design PubMed, Scopus, and archive/pre-print servers were searched up to May 22nd, 2021. Cross sectional surveys reporting the percentage of the pregnant individuals intending to get a COVID-19 vaccine were considered eligible for meta-analysis. This review was registered with PROSPERO (CRD42021254484). The primary outcome was to estimate the prevalence of COVID-19 vaccination intent among pregnant population. The secondary outcome was to evaluate the factors influencing the intention for vaccination. Results Twelve studies sourcing data of 16,926 individuals who were identified as pregnant were eligible. The estimated intention for the receipt of COVID-19 vaccine among women who were pregnant was 47% (95% CI: 38-57%), with the lowest prevalence in Africa 19% (95% CI: 17-21%) and the highest in Oceania 48.0% (95% CI: 44.0-51.0%). Uptake of other vaccines (influenza and/or Tdap) during pregnancy was associated with higher rate of intent to receive the COVID-19 vaccine (OR = 3.03; 95% CI: 1.37-6.73; p = 0.006). Conclusion The intent to receive COVID-19 vaccine is relatively low among women who are pregnant and substantially varies based on the country of residence. In our meta-analysis, intent of women who were pregnant to receive the COVID-19 vaccine was significantly associated with the history of receiving influenza or Tdap vaccine during pregnancy. Given that in every country only a minority of gravidae have received the COVID-19 vaccine, despite known risks of maternal morbidity and mortality with no evidence of risks of vaccination, it highlights the importance of revised approaches at shared decision making and focused public health messaging by national and international advisories. Key Points The estimated global intention for COVID-19 vaccination among pregnant women was 47%. The lowest intention was in Africa and the highest in Oceania. These findings highlight the importance of public health messaging by by different agencies. © 2021 Georg Thieme Verlag. All rights reserved. |

1  
2  
3  
4  
5  
6  
7  
8  
9  
10  
11  
12  
13  
14  
15  
16  
17  
18  
19  
20  
21  
22  
23  
24  
25  
26  
27  
28  
29  
30  
31  
32  
33  
34  
35  
36  
37  
38  
39  
40  
41  
42  
43  
44  
45  
46

| Year | Author(s)                                                                                                                                            | Title                                                                                                  | Journal                    | Abstract                                                                                                                                                                                                                                                                                                                                                                                                                                                                                                                                                                                                                                                                                                                                                                                                                                                                                                                                                                                                                                                                                                                                                                                                                                                                                                                                                                                                                                                                                                                                                                                                                                                                                                                                                                                                                                                                                                                                                                                                                                                                                                                   |
|------|------------------------------------------------------------------------------------------------------------------------------------------------------|--------------------------------------------------------------------------------------------------------|----------------------------|----------------------------------------------------------------------------------------------------------------------------------------------------------------------------------------------------------------------------------------------------------------------------------------------------------------------------------------------------------------------------------------------------------------------------------------------------------------------------------------------------------------------------------------------------------------------------------------------------------------------------------------------------------------------------------------------------------------------------------------------------------------------------------------------------------------------------------------------------------------------------------------------------------------------------------------------------------------------------------------------------------------------------------------------------------------------------------------------------------------------------------------------------------------------------------------------------------------------------------------------------------------------------------------------------------------------------------------------------------------------------------------------------------------------------------------------------------------------------------------------------------------------------------------------------------------------------------------------------------------------------------------------------------------------------------------------------------------------------------------------------------------------------------------------------------------------------------------------------------------------------------------------------------------------------------------------------------------------------------------------------------------------------------------------------------------------------------------------------------------------------|
| 2021 | A. D. Wake                                                                                                                                           | The Acceptance Rate Toward COVID-19 Vaccine in Africa: A Systematic Review and Meta-analysis           | Global Pediatric Health    | Background: The Coronavirus Disease 2019 (COVID-19) pandemic remains serious public issue. COVID-19 vaccine is a vital strategy to prevent this critical pandemic. However, unwillingness to take this vaccine are key barriers to manage the COVID-19 pandemic. The control of this pandemic will depend principally on the people acceptance of COVID-19 vaccine. Therefore, this systematic review and meta-analysis was intended to determine the acceptance rate toward COVID-19 vaccine in Africa. Methods: African Journals OnLine, PubMed, Cochrane Review, HINARI, EMBASE, Google Scholar, Web of Science, and Scopus were used to retrieve related articles. The Preferred Reporting Items for Systematic Review and Meta-Analysis (PRISMA) guidelines were used for this study. Random-effect model, a funnel plot, Egger's test, I-2 statistic, subgroup analysis was done. The study was performed by using a STATA version 11 statistical software. Results: A total of 22 studies with 33,912 study participants were included in this systematic review and meta-analysis. From this finding, the pooled prevalence of acceptance toward COVID-19 vaccine among adults in Africa was 48.93% (95% CI: [39.49, 58.37]). The subgroup analysis revealed that the pooled prevalence of COVID-19 vaccine acceptance among adults in Africa was highest (66.03%, 95% CI [62.84, 69.22]) in Southern Africa, and Lowest (24.28%, 95% CI [3.26, 45.30]) in Northern Africa. Conclusion: This study showed that the estimate of the pooled prevalence of acceptance toward COVID-19 vaccine among adults in Africa was very low. All concerned bodies should be actively involved to improve the acceptance rate of COVID-19 vaccine.                                                                                                                                                                                                                                                                                                                                                                               |
| 2022 | A. I. Al-Mustapha, M. I. Abubakar, M. Oyewo, R. E. Esighetti, O. A. Ogundijo, L. D. Bolanle, O. E. Fakayode, A. S. Olugbon, M. Oguntoye and N. Elelu | Socio-Demographic Characteristics of COVID-19 Vaccine Recipients in Kwara State, North Central Nigeria | Frontiers in Public Health | Understanding key socio-demographic variables of 2019 coronavirus disease (COVID-19) vaccine recipients is crucial to improving its acceptance and Nigeria's COVID-19 control strategy. The survey was conducted as a non-probability cross-sectional survey of 2,936 COVID-19 vaccine recipients in Kwara State. Our findings revealed that 74% (n = 2,161) of the vaccine recipients were older than 40 years. Forty percent (n = 1,180) of the vaccine recipients earned a monthly income >100,000 Naira (equivalent to US \$200). Most of the vaccine recipients (64%, n = 1,880) had tertiary education, while 15% (n = 440) of them had no formal education. Almost half of the recipients (47%, n = 1,262) were government employees and 28.8% (n = 846) of them had health-related backgrounds. Only 17% (n = 499) of the vaccine recipients have been screened for the severe acute respiratory syndrome coronavirus 2 (SARS-CoV-2), of which 21% (n = 105/499) of them were tested positive. Only 47% (n = 1,378) had been fully immunized. The prevalence of confirmed COVID-19 cases among COVID-19 vaccine recipients in Kwara State was 3.6% (n = 105/2,936). The most recurrent adverse events following immunization (AEFIs) among vaccine recipients were fever (14%, n = 411), pain at injection site (47%, n = 1,409), headache (19%, n = 558), and body weakness (9%, n = 264). The need to protect themselves from the deadly virus was the main reason that prompted people to voluntarily accept the COVID-19 vaccine. There is a high level of COVID-19 vaccine acceptance among respondents across all social classes including those with no formal education, those with very low monthly income (< US \$2 per day), and in untested population. Hence, vaccine donors should prioritize equitable distribution to Low-and-Middle-income Countries (LMICs) such as Nigeria, and health authorities should improve vaccine advocacy to focus on vaccine safety and efficacy. Copyright © 2022 Al-Mustapha, Abubakar, Oyewo, Esighetti, Ogundijo, Bolanle, Fakayode, Olugbon, Oguntoye and Elelu. |

| Year | Author(s)                                                                                        | Title                                                                                                                                                                        | Journal                                   | Abstract                                                                                                                                                                                                                                                                                                                                                                                                                                                                                                                                                                                                                                                                                                                                                                                                                                                                                                                                                                                                                                                                                                                                                                                                                                                                                                                                                                                                                                                                                                                                                                                                                                                                                                                                                                                                                                                                                                                                                                                                                                                                                                                                                                                 |
|------|--------------------------------------------------------------------------------------------------|------------------------------------------------------------------------------------------------------------------------------------------------------------------------------|-------------------------------------------|------------------------------------------------------------------------------------------------------------------------------------------------------------------------------------------------------------------------------------------------------------------------------------------------------------------------------------------------------------------------------------------------------------------------------------------------------------------------------------------------------------------------------------------------------------------------------------------------------------------------------------------------------------------------------------------------------------------------------------------------------------------------------------------------------------------------------------------------------------------------------------------------------------------------------------------------------------------------------------------------------------------------------------------------------------------------------------------------------------------------------------------------------------------------------------------------------------------------------------------------------------------------------------------------------------------------------------------------------------------------------------------------------------------------------------------------------------------------------------------------------------------------------------------------------------------------------------------------------------------------------------------------------------------------------------------------------------------------------------------------------------------------------------------------------------------------------------------------------------------------------------------------------------------------------------------------------------------------------------------------------------------------------------------------------------------------------------------------------------------------------------------------------------------------------------------|
| 2021 | A. Mose and A. Yeshaneh                                                                          | COVID-19 vaccine acceptance and its associated factors among pregnant women attending antenatal care clinic in southwest ethiopia: Institutional-based cross-sectional study | International Journal of General Medicine | Background: COVID-19 vaccination is a safe and effective approach to control the pandemic and to prevent its associated morbidity and mortality. To our knowledge, there is no study conducted to assess the prevalence of COVID-19 vaccine acceptance among pregnant women in Ethiopia. Therefore, the main objective of this study was to assess the prevalence of COVID-19 vaccine acceptance and its associated factors among pregnant women attending antenatal care clinic in Southwest Ethiopia. Methods: An institution-based cross-sectional study was employed from January 1 up to 30, 2021. A systematic random sampling technique was used to select 396 study participants. A structured and face-to-face interview was used to collect data. Data were entered into Epi-data version 4.2.0 and exported to SPSS version 23 for analysis. Bivariate and multivariate analyses were used to identify factors associated with COVID-19 vaccine acceptance. P values <0.05 result were considered as a statistically significant association. Results: The COVID-19 vaccine acceptance was found to be 70.7% (95% CI, 66.7%– 74.7%). Maternal age (34–41) years [AOR=1.464, (95% CI; 1.218–5.129)], primary maternal educational status [AOR=3.476, (95% CI; 1.520–7.947)], good knowledge [AOR=5.946, (95% CI; 3.147–7.065)], and good practice [AOR =9.15, (95% CI; 8.734–12.189)] of pregnant women towards COVID-19 and its preventive measures were factors associated with COVID-19 vaccine acceptance. Conclusion: COVID-19 vaccine acceptance was found to be 70.9%. Maternal age (34–41) years, primary maternal educational status, good knowledge, and good practice of pregnant women towards COVID-19 and its preventive measures were factors associated with COVID-19 vaccine acceptance. Health care workers should provide health education to pregnant women to increase their knowledge about the diseases and disseminate leaflets regarding COVID-19 preventive measures. Moreover, before initiation of COVID-19 vaccine administration to pregnant women they must promote the safety and effectiveness of COVID-19 vaccine. © 2021 Mose and Yeshaneh. |
| 2021 | A. T. Chinawa, J. M. Chinawa, E. N. Ossai, N. Obinna, V. Onukwuli, A. E. Aronu and C. P. Manyike | Maternal level of awareness and predictors of willingness to vaccinate children against COVID 19; A multi-center study                                                       | Human Vaccines and Immunotherapeutics     | Background: Several controversies surround mothers' willingness to vaccinate against the COVID-19 pandemic especially when mortality is not frequently reported in children. Objectives: This study aimed to ascertain the willingness of mothers of children attending two institutions in Southeast Nigeria to accept the COVID-19 vaccine and factors that may be associated with their choices. Methodology: This was a cross-sectional study carried out among 577 mothers who presented with their children in two tertiary health institutions in southeast Nigeria. Results: Majority of the respondents (93.9%) were aware of the COVID-19 vaccine. Majority of the respondents, 89.4%, noted that children were not in high priority groups for COVID-19 vaccination in Nigeria. Only 6.9% of the respondents intend to receive the COVID-19 vaccination. Also, a minor proportion of the respondents (4.9%) were willing to vaccinate their children with the COVID-19 vaccine. The odds of receiving the Covid-19 vaccine were four times greater in those who believed that they could be infected than in those who believed that they could not be infected (AOR = 4.0. 95% CI:1.8–8.7). The odds of receiving the Covid-19 vaccine were six times greater in those who were aware of someone that died from COVID-19 than in those who did not know anyone who died from COVID-19 (AOR = 5.7, 95% CI: 2.1–15.8). Conclusion: A high level of awareness but low acceptance level for COVID-19 vaccination for mothers and their children was noted. Socioeconomic class, maternal age, and level of education did not influence the willingness of the mother to receive COVID vaccination. Having a belief of possibility of infection with the COVID-19 as well as being aware of someone who died from the disease were important positive variables that could predict vaccine acceptance from this study. © 2021 Taylor & Francis Group, LLC.                                                                                                                                                                                                                        |

| Year | Author(s)                                                                                                                                                                                                                                                                                                                                                                           | Title                                                                                                                  | Journal  | Abstract                                                                                                                                                                                                                                                                                                                                                                                                                                                                                                                                                                                                                                                                                                                                                                                                                                                                                                                                                                                                                                                                                                                                                                                                                                                                                                                                                                                                                                                                                                                                                                                                                                                                                                                                                                                                                                                                                                                                                                                                                                                                                                                                                             |
|------|-------------------------------------------------------------------------------------------------------------------------------------------------------------------------------------------------------------------------------------------------------------------------------------------------------------------------------------------------------------------------------------|------------------------------------------------------------------------------------------------------------------------|----------|----------------------------------------------------------------------------------------------------------------------------------------------------------------------------------------------------------------------------------------------------------------------------------------------------------------------------------------------------------------------------------------------------------------------------------------------------------------------------------------------------------------------------------------------------------------------------------------------------------------------------------------------------------------------------------------------------------------------------------------------------------------------------------------------------------------------------------------------------------------------------------------------------------------------------------------------------------------------------------------------------------------------------------------------------------------------------------------------------------------------------------------------------------------------------------------------------------------------------------------------------------------------------------------------------------------------------------------------------------------------------------------------------------------------------------------------------------------------------------------------------------------------------------------------------------------------------------------------------------------------------------------------------------------------------------------------------------------------------------------------------------------------------------------------------------------------------------------------------------------------------------------------------------------------------------------------------------------------------------------------------------------------------------------------------------------------------------------------------------------------------------------------------------------------|
| 2021 | Abayomi Samuel Oyekale                                                                                                                                                                                                                                                                                                                                                              | Compliance Indicators of COVID-19 Prevention and Vaccines Hesitancy in Kenya: A Random-Effects Endogenous Probit Model | Vaccines | Vaccine hesitancy remains a major public health concern in the effort towards addressing the COVID-19 pandemic. This study analyzed the effects of indicators of compliance with preventive practices on the willingness to take COVID-19 vaccines in Kenya. The data were from the COVID-19 Rapid Response Phone Surveys conducted between January and June 2021 during the fourth and fifth waves. The data were analyzed with the random-effects endogenous Probit regression model, with estimated parameters tested for robustness and stability. The results showed that willingness to take vaccines increased between the fourth and fifth waves. Compliance with many of the preventive practices also improved, although the utilizations of immune system-promoting practices were very low. The panel Probit regression results showed that compliance indicators were truly endogenous and there was existence of random effects. Immune system-boosting and contact-prevention indicators significantly increased and decreased the willingness to take vaccines, respectively ( $p < 0.01$ ). The experience of mental health disorders in the form of nervousness and hopelessness also significantly influenced vaccine hesitancy ( $p < 0.10$ ). Willingness to take vaccines also significantly increased among older people and those with a formal education ( $p < 0.01$ ). Different forms of association exist between vaccine hesitancy and the prevention compliance indicators. There is a need to properly sensitize the people to the need to complement compliance with COVID-19 contact-prevention indicators with vaccination. Addressing mental health disorders in the form of loneliness, nervousness, depression, hopelessness and anxiety should also become the focus of public health, while efforts to reduce vaccine hesitancy should focus on individuals without formal education, males and youths.                                                                                                                                                                                                                      |
| 2021 | AbdulAzeez A. Anjorin, Ismail A. Odetokun, Ajibola I. Abioye, Hager Elnadi, Mfon Valencia Umoren, Bamu F. Damaris, Joseph Eyedo, Haruna I. Umar, Jean B. Nyandwi, Mena M. Abdalla, Sodiq O. Tijani, Kwame S. Awiagah, Gbolahan A. Idowu, Sifeuh N. Achille Fabrice, Aala M. O. Maisara, Youssef Razouqi, Zuhail E. Mhgoob, Salim Parker, Osaretin E. Asowata and Ismail O. Adesanya | Will Africans take COVID-19 vaccination?                                                                               | PLoS ONE | The economic and humanistic impact of COVID-19 pandemic is enormous globally. No definitive treatment exists, hence accelerated development and approval of COVID-19 vaccines, offers a unique opportunity for COVID-19 prevention and control. Vaccine hesitancy may limit the success of vaccine distribution in Africa, therefore we assessed the potentials for coronavirus vaccine hesitancy and its determinants among Africans. An online cross-sectional African-wide survey was administered in Arabic, English, and French languages. Questions on demographics, self-reported health status, vaccine literacy, knowledge and perception on vaccines, past experience, behavior, infection risk, willingness to receive and affordability of the SARS-COV-2 vaccine were asked. Data were subjected to descriptive and inferential statistics. A total of 5,416 individuals completed the survey. Approximately, 94% were residents of 34 African countries while the other Africans live in the Diaspora. Only 63% of all participants surveyed were willing to receive the COVID-19 vaccination as soon as possible and 79% were worried about its side effects. Thirty-nine percent expressed concerns of vaccine-associated infection. The odds of vaccine hesitancy was 0.28 (95% CI: 0.22, 0.30) among those who believed their risk of infection was very high, compared to those who believed otherwise. The odds of vaccine hesitancy was one-fifth (OR = 0.21, 95% CI: 0.16, 0.28) among those who believed their risk of falling sick was very high, compared to those who believed their risk of falling very sick was very low. The OR of vaccine hesitancy was 2.72 (95% CI: 2.24, 3.31) among those who have previously refused a vaccine for themselves or their child compared to counterparts with no self-reported history of vaccine hesitancy. Participants want the vaccines to be mandatory (40%), provided free of charge (78%) and distributed in homes and offices (44%). COVID-19 vaccine hesitancy is substantial among Africans based on perceived risk of coronavirus infection and past experiences. [ABSTRACT FROM AUTHOR] |



| Year | Author(s)                                                                                                                                                                     | Title                                                                                                                                                 | Journal                             | Abstract                                                                                                                                                                                                                                                                                                                                                                                                                                                                                                                                                                                                                                                                                                                                                                                                                                                                                                                                                                                                                                                                                                                                                                                                                                                                                                                                                                                                                                                                                                                                                                                                                                                                                                                                                                                                                                                                                                                                                                                                                                                                                                                                                                                                                                                                                                                                                   |
|------|-------------------------------------------------------------------------------------------------------------------------------------------------------------------------------|-------------------------------------------------------------------------------------------------------------------------------------------------------|-------------------------------------|------------------------------------------------------------------------------------------------------------------------------------------------------------------------------------------------------------------------------------------------------------------------------------------------------------------------------------------------------------------------------------------------------------------------------------------------------------------------------------------------------------------------------------------------------------------------------------------------------------------------------------------------------------------------------------------------------------------------------------------------------------------------------------------------------------------------------------------------------------------------------------------------------------------------------------------------------------------------------------------------------------------------------------------------------------------------------------------------------------------------------------------------------------------------------------------------------------------------------------------------------------------------------------------------------------------------------------------------------------------------------------------------------------------------------------------------------------------------------------------------------------------------------------------------------------------------------------------------------------------------------------------------------------------------------------------------------------------------------------------------------------------------------------------------------------------------------------------------------------------------------------------------------------------------------------------------------------------------------------------------------------------------------------------------------------------------------------------------------------------------------------------------------------------------------------------------------------------------------------------------------------------------------------------------------------------------------------------------------------|
| 2021 | Abiy Tadesse Angelo, Daniel Shiferaw Alemayehu and Aklilu Mamo Dachew                                                                                                         | Health care workers intention to accept COVID-19 vaccine and associated factors in southwestern Ethiopia, 2021                                        | PLOS ONE                            | Introduction Health care workers are the most affected part of the world population due to the COVID-19 pandemic. Countries prioritize vaccinating health workers against COVID-19 because of their susceptibility to the virus. However, the acceptability of the vaccine varies across populations. Thus, this study aimed to determine the health care worker's intentions to accept the COVID-19 vaccine and its associated factors in southwestern Ethiopia, 2021. Methods A facility-based cross-sectional study was conducted among health care workers in public hospitals in southwestern Ethiopia from March 15 to 28, 2021. A simple random sampling method was used to select 405 participants from each hospital. Data were collected using self-administered questionnaires. Descriptive statistics, such as frequency and percentage, were calculated. Multivariable logistic regression was also performed to identify factors associated with health care worker's intention to accept the COVID-19 vaccine. Statistically significant variables were selected based on p-values (<0.05) and the adjusted odds ratio was used to describe the strength of association with 95% confidence intervals. Result Among the respondents, 48.4% [95% CI: 38.6, 58.2] of health care workers intended to accept COVID-19. Intention to accept COVID-19 vaccination was significantly associated with physicians (AOR = 9.27, 95% CI: 1.27–27.32), professionals with a history of chronic illness (AOR = 4.07, 95% CI: 2.02–8.21), perceived degree of risk of COVID-19 infection (AOR = 4.63, 95% CI: 1.26–16.98), positive attitude toward COVID-19 prevention (AOR = 6.08, 95% CI: 3.39–10.91) and good preventive practices (AOR = 2.83, 95% CI: 1.58–5.08). Conclusion In this study, the intention of health care workers to accept the COVID-19 vaccine was low. Professional types, history of chronic illness, perceived degree of risk to COVID-19 infection, attitude toward COVID-19 and preventive practices were found to be factors for intention to accept COVID-19 vaccine in professionals. It is important to consider professional types, history of chronic illness, perceived degree of risk to COVID-19, attitude of professionals and preventive behaviors to improve the intention of professionals' vaccine acceptance. |
| 2021 | Agazhe Aemro, Nakachew Sewnet Amare, Belayneh Shetie, Basazineh Chekol and Mulugeta Wassie                                                                                    | Determinants of COVID-19 vaccine hesitancy among health care workers in Amhara region referral hospitals, Northwest Ethiopia: a cross-sectional study | Epidemiology & Infection            |                                                                                                                                                                                                                                                                                                                                                                                                                                                                                                                                                                                                                                                                                                                                                                                                                                                                                                                                                                                                                                                                                                                                                                                                                                                                                                                                                                                                                                                                                                                                                                                                                                                                                                                                                                                                                                                                                                                                                                                                                                                                                                                                                                                                                                                                                                                                                            |
| 2021 | Andrea C Carcelen, Christine Prosperi, Simon Mutembo, Gershom Chongwe, Francis D Mwansa, Phillimon Ndubani, Edgar Simulundu, Innocent Chilumba, Gloria Musukwa and Phil Thuma | COVID-19 vaccine hesitancy in Zambia: A glimpse at the possible challenges ahead for COVID-19 vaccination rollout in sub-Saharan Africa               | Human Vaccines & Immunotherapeutics |                                                                                                                                                                                                                                                                                                                                                                                                                                                                                                                                                                                                                                                                                                                                                                                                                                                                                                                                                                                                                                                                                                                                                                                                                                                                                                                                                                                                                                                                                                                                                                                                                                                                                                                                                                                                                                                                                                                                                                                                                                                                                                                                                                                                                                                                                                                                                            |

1  
2  
3  
4  
5  
6  
7  
8  
9  
10  
11  
12  
13  
14  
15  
16  
17  
18  
19  
20  
21  
22  
23  
24  
25  
26  
27  
28  
29  
30  
31  
32  
33  
34  
35  
36  
37  
38  
39  
40  
41  
42  
43  
44  
45  
46

| Year | Author(s)                                                                                                                                                                                                                                                                         | Title                                                                                                         | Journal                    | Abstract                                                                                                                                                                                                                                                                                                                                                                                                                                                                                                                                                                                                                                                                                                                                                                                                                                                                                                                                                                                                                                                                                                                                                                                                                                                                                                                                                                                                                                                                                                                                                                                                                                                                                                                                                                                                                                                                                                                                                                                                                                                                                                                                                                                                     |
|------|-----------------------------------------------------------------------------------------------------------------------------------------------------------------------------------------------------------------------------------------------------------------------------------|---------------------------------------------------------------------------------------------------------------|----------------------------|--------------------------------------------------------------------------------------------------------------------------------------------------------------------------------------------------------------------------------------------------------------------------------------------------------------------------------------------------------------------------------------------------------------------------------------------------------------------------------------------------------------------------------------------------------------------------------------------------------------------------------------------------------------------------------------------------------------------------------------------------------------------------------------------------------------------------------------------------------------------------------------------------------------------------------------------------------------------------------------------------------------------------------------------------------------------------------------------------------------------------------------------------------------------------------------------------------------------------------------------------------------------------------------------------------------------------------------------------------------------------------------------------------------------------------------------------------------------------------------------------------------------------------------------------------------------------------------------------------------------------------------------------------------------------------------------------------------------------------------------------------------------------------------------------------------------------------------------------------------------------------------------------------------------------------------------------------------------------------------------------------------------------------------------------------------------------------------------------------------------------------------------------------------------------------------------------------------|
| 2021 | Andrew Marvin Kanyike, Ronald Olum, Jonathan Kajjimu, Daniel Ojilong, Gabriel Madut Akech, Dianah Rhoda Nassozi, Drake Agira, Nicholas Kisaakye Wamala, Asaph Asiiimwe, Dissan Matovu, Ann Babra Nakimuli, Musilim Lyavala, Patricia Kulwenza, Joshua Kiwumulo and Felix Bongomin | Acceptance of the coronavirus disease-2019 vaccine among medical students in Uganda                           | Tropical Medicine & Health | Background: COVID-19 is still a major global threat for which vaccination remains the ultimate solution. Uganda reported 40,751 cases and 335 deaths as of 9 April 2021 and started its vaccination program among priority groups like health workers, teachers, those with chronic diseases among others in early March 2021. Unanimous uptake of the COVID-19 vaccine is required to subsequently avert its spread; therefore, we assessed COVID-19 vaccine acceptability, hesitancy, and associated factors among medical students in Uganda. Methods: This study employed an online descriptive cross-sectional survey among medical students across 10 medical schools in Uganda. A structured questionnaire via Google Form was conveniently sent to eligible participants via WhatsApp. Each medical school had a coordinator who consistently shared the data tool in the WhatsApp groups. Chi-square or Fisher's exact test, and logistic regression were used to assess the association between vaccine acceptability with demographics, COVID-19 risk perception, and vaccine hesitancy. Results: We surveyed 600 medical students, 377 (62.8%) were male. COVID-19 vaccine acceptability was 37.3% and vaccine hesitancy 30.7%. Factors associated with vaccine acceptability were being male (adjusted odds ratio (aOR) = 1.9, 95% CI 1.3-2.9, p=0.001) and being single (aOR= 2.1, 95% CI 1.1-3.9, p=0.022). Very high (aOR= 3.5, 95% CI 1.7-6.9, p<0.001) or moderate (aOR=2.2, 95% CI 1.2-4.1, p=0.008) perceived risk of getting COVID-19 in the future, receiving any vaccine in the past 5 years (aOR= 1.6, 95% CI 1.1-2.5, p=0.017), and COVID-19 vaccine hesitancy (aOR 0.6, 95% CI 0.4-0.9, p=0.036). Conclusions: This study revealed low levels of acceptance towards the COVID-19 vaccine among medical students, low self-perceived risks of COVID-19, and many had relied on social media that provided them with negative information. This poses an evident risk on the battle towards COVID-19 in the future especially when these future health professions are expected to be influencing decisions of the general public towards the same. [ABSTRACT FROM AUTHOR]           |
| 2022 | Ayenew Mose, Kassahun Haile and Abebe Timerga                                                                                                                                                                                                                                     | COVID-19 vaccine hesitancy among medical and health science students attending Wolkite University in Ethiopia | PLOS ONE                   | Background: Medical and health science students are among the frontline health care workers who are at high risk of acquiring COVID-19 infection during their clinical attachments and future career. As health care providers, they are expected to promote and administer the COVID-19 vaccine and counsel vaccine-hesitant patients. It is, therefore, imperative to assess COVID-19 vaccine hesitancy among medical and health science students. Thus, this study aimed to assess COVID-19 vaccine hesitancy and its associated factors among medical and health science students of Wolkite University. Method: An institutional-based cross-sectional study design was conducted among 420 medical and health science students attending Wolkite University from March 1 to 30, 2021. Simple random sampling technique was used to select study participants. Self-administered and structured questionnaires were used to collect data. Data were entered into Epi-Data version 4.2.0 and exported to SPSS version 23 software package for further analysis. Bivariable and multivariable analysis was used to identify associated factors. P values <0.05 result were considered as a statistically significant association. Results: The level of COVID-19 vaccine hesitancy was 41.2% (95% CI; 35.2%-50.4%). Student age ≤23 years were 1.9 times more likely vaccine hesitant [aOR = 1.94, 95% CI; 1.14–3.28], being female were 1.7 times more likely vaccine hesitant [aOR = 1.76, 95% CI; 1.14–2.72], resided in rural area were 1.6 times more likely vaccine hesitant [aOR = 1.63, 95% CI; 1.06–2.49], source of information from social media were 2.7 times more likely vaccine hesitant [aOR = 2.68, 95% CI; 1.58–4.54], and good practice to COVID-19 mitigation measures were 47% less likely vaccine hesitant [aOR = 0.53, 95% CI; 0.34–0.83] compared to their counterpart. Conclusions: COVID-19 vaccine hesitancy is found to be high. Therefore, students are advised to receive COVID-19 vaccine information from government lead mass media (i.e. television and radio), increase awareness and adherence to COVID-19 mitigation measures is recommended. [ABSTRACT FROM AUTHOR] |

| Year | Author(s)                                                                                                       | Title                                                                                                                                       | Journal                              | Abstract                                                                                                                                                                                                                                                                                                                                                                                                                                                                                                                                                                                                                                                                                                                                                                                                                                                                                                                                                                                                                                                                                                                                                                                                                                                                                                                                                                                                                                                                                                                                                                                                                                                                                                                                                                                                                                                                                                                                                                                                                                                                                                                                                                                                                                                                                                                    |
|------|-----------------------------------------------------------------------------------------------------------------|---------------------------------------------------------------------------------------------------------------------------------------------|--------------------------------------|-----------------------------------------------------------------------------------------------------------------------------------------------------------------------------------------------------------------------------------------------------------------------------------------------------------------------------------------------------------------------------------------------------------------------------------------------------------------------------------------------------------------------------------------------------------------------------------------------------------------------------------------------------------------------------------------------------------------------------------------------------------------------------------------------------------------------------------------------------------------------------------------------------------------------------------------------------------------------------------------------------------------------------------------------------------------------------------------------------------------------------------------------------------------------------------------------------------------------------------------------------------------------------------------------------------------------------------------------------------------------------------------------------------------------------------------------------------------------------------------------------------------------------------------------------------------------------------------------------------------------------------------------------------------------------------------------------------------------------------------------------------------------------------------------------------------------------------------------------------------------------------------------------------------------------------------------------------------------------------------------------------------------------------------------------------------------------------------------------------------------------------------------------------------------------------------------------------------------------------------------------------------------------------------------------------------------------|
| 2021 | B. O. Botwe, W. K. Antwi, J. A. Adusei, R. N. Mayeden, T. N. Akudjedu and S. D. Sule                            | COVID-19 vaccine hesitancy concerns: Findings from a Ghana clinical radiography workforce survey                                            | Radiography (London, England : 1995) | <p>Introduction: Vaccination is a key global strategy to mitigate the clinical impact of the COVID-19 virus. As part of local efforts to manage the outbreak, the government of Ghana announced its intention to vaccinate its population starting with essential and high-risk workers including radiographers. However, there were reports of hesitance to receiving the vaccine among the radiography workforce. This study was undertaken prior to the intended vaccination exercise to assess the willingness and concerns of radiographers to undergo the COVID-19 vaccination and to suggest recommendations to improve the vaccine uptake.; Methods: An ethically-approved online survey strategy was employed for this cross-sectional study conducted between 24th-28th February 2021. The survey employed quantitative questions and open text response options. Quantitative and open text responses were analysed using statistical and thematic analyses, respectively.; Results: There were 108 responses (response rate of 46.3%). The majority (n = 64, 59.3%) were willing to have the vaccine, however, some (n = 44, 40.7%) were not. The main reason behind their willingness to have the vaccine was its ability to reduce the spread of infections and lower mortality (n = 35, 54.7%). However, doubts about the vaccine's efficacy and side effects (n = 26, 56.8%), conspiracy theory concerns about its effects on the Ghanaian race (n = 4, 9.1%), and fertility concerns (n = 2, 4.5%) were some reasons for their hesitance to receive the vaccine. The open text commentary further revealed that the vaccine was thought of as a lifesaving medication, however, clinical safety concerns, lack of education/information and religious beliefs were affecting peoples' willingness to be vaccinated.; Conclusion: Our findings demonstrate the need for an urgent public health educational intervention to address the COVID-19 vaccine hesitancy concerns raised by radiographers to help increase the vaccine uptake.; Implication for Practice: The study provides pertinent information to improve COVID-19 vaccine uptake among radiographers to limit the spread of infections. (Copyright © 2021 The College of Radiographers. Published by Elsevier Ltd. All rights reserved.)</p> |
| 2021 | B. T. Taye, F. K. Amogne, T. L. Demisse, M. S. Zerihun, T. M. Kitaw, A. E. Tiguh, M. S. Mihret and A. A. Kebede | Coronavirus disease 2019 vaccine acceptance and perceived barriers among university students in northeast Ethiopia: A cross-sectional study | Clin Epidemiol Glob Health           | <p>BACKGROUND: Universities are places where students live and study in close contact to each other. Nowadays, the foundations of this particular group have been affected significantly by the rapid spread of the coronavirus disease 2019. The severity of the COVID-19 pandemic has demanded the emergency use of COVID-19 vaccines. However, there is still limited evidence in COVID-19 vaccine acceptability and perceived barriers among some subgroups, including university students. This study aimed to assess vaccine acceptance, associated factors, and perceived barriers among university students, Ethiopia. METHODS: A cross-sectional study was conducted in January 2021 at Debre Berhan University among 423 students. The participants were selected using simple random sampling technique. A semi-structured, pretested, and self-administered questionnaire was used to collect the data. Multivariable logistic-regression model was fitted to identify factors associated with vaccine acceptance. An adjusted odds ratio with 95% confidence interval and its p-value of <math>\leq 0.05</math> was used to declare significant association. RESULTS: The proportion of the COVID-19 vaccine acceptance was 69.3% (95% CI: 65, 74). Being knowledgeable (AOR: 2.43, CI: 1.57, 3.77), being a health science student (AOR: 2.25, CI: 1.43, 3.54), and being in a family practicing COVID-19 prevention (AOR: 1.73, CI: 1.06, 2.81) were found to be factors associated with COVID-19 vaccine acceptance. CONCLUSION: Though, this study found a 69.3% acceptance of COVID-19 vaccine, there were noticeable perceived barriers and related factors in vaccine acceptance hesitancy. Thus, health education and communication regarding the vaccine are very crucial to alleviate the identified barriers.</p>                                                                                                                                                                                                                                                                                                                                                                                                                                                                                   |

1  
2  
3  
4  
5  
6  
7  
8  
9  
10  
11  
12  
13  
14  
15  
16  
17  
18  
19  
20  
21  
22  
23  
24  
25  
26  
27  
28  
29  
30  
31  
32  
33  
34  
35  
36  
37  
38  
39  
40  
41  
42  
43  
44  
45  
46

| Year | Author(s)                                 | Title                                                                                           | Journal                              | Abstract                                                                                                                                                                                                                                                                                                                                                                                                                                                                                                                                                                                                                                                                                                                                                                                                                                                                                                                                                                                                                                                                                                                                                                                                                                                                                                                                                                                                                                                                                                                                                                                                                                                                                                                                                                                                                                                                                                                                                                                                                                                                                                                                                                                                                                                                                                                                                                                                                                                                                                                                                                                                                               |
|------|-------------------------------------------|-------------------------------------------------------------------------------------------------|--------------------------------------|----------------------------------------------------------------------------------------------------------------------------------------------------------------------------------------------------------------------------------------------------------------------------------------------------------------------------------------------------------------------------------------------------------------------------------------------------------------------------------------------------------------------------------------------------------------------------------------------------------------------------------------------------------------------------------------------------------------------------------------------------------------------------------------------------------------------------------------------------------------------------------------------------------------------------------------------------------------------------------------------------------------------------------------------------------------------------------------------------------------------------------------------------------------------------------------------------------------------------------------------------------------------------------------------------------------------------------------------------------------------------------------------------------------------------------------------------------------------------------------------------------------------------------------------------------------------------------------------------------------------------------------------------------------------------------------------------------------------------------------------------------------------------------------------------------------------------------------------------------------------------------------------------------------------------------------------------------------------------------------------------------------------------------------------------------------------------------------------------------------------------------------------------------------------------------------------------------------------------------------------------------------------------------------------------------------------------------------------------------------------------------------------------------------------------------------------------------------------------------------------------------------------------------------------------------------------------------------------------------------------------------------|
| 2021 | Bewunetu Zewude and Tewodros Habtegiorgis | Willingness to Take COVID-19 Vaccine Among People Most at Risk of Exposure in Southern Ethiopia | Pragmatic and observational research | <p>Background: Acceptance of a vaccine or hesitancy towards it have great public health implications as they partly determine the extent to which people are exposed to infections that could have otherwise been prevented. The present study examined the willingness of primary and secondary school teachers, bank employees, and university instructors in southern Ethiopia to take a Covid-19 vaccine and the factors associated with their willingness.;</p> <p>Methods: An institutional-based cross-sectional study design was used with a quantitative research approach. Primary data were gathered mainly through the use of a survey research method in which a self-administered questionnaire was distributed to randomly selected research participants in Wolaita Sodo town. Data analysis was conducted using statistical techniques, including percentages, frequency distributions, and logistic regression analysis.;</p> <p>Results: Research participants generally had a low (46.1%) willingness to take a COVID-19 vaccine. The main reason for most (37%) respondents' hesitancy to take the vaccine is found to be the concern over the safety and/or the side effects of the vaccine (37%), followed by doubt about the vaccine's effectiveness (20.7%), and lack of adequate information (12.7%). Moreover, 38.9% of survey participants revealed that they would like to take a COVID-19 vaccine other than AstraZeneca whereas 61.1% of respondents replied that they do not want to take any kind of COVID-19 vaccine. Furthermore, respondents' willingness to take a COVID-19 vaccine is significantly associated with attitude towards the vaccine (OR = 2.830; 95% CI = 1.834-4.368), belief that Covid-19 exists in the study area (OR = 0.221; 95% CI = 0.083-0.589), the perception that prevalence and death rate reports of the government are real (OR = 0.365; 95% CI = 0.197-0.676), status of chronic diseases (OR = 2.883; 95%CI = 1.039-7.999), and having a close relative/friend ever infected by COVID-19 (OR = 2.602; 95% CI = 1.117-6.063).;</p> <p>Conclusion: The findings of the research demonstrated that there is generally low willingness to take a COVID-19 vaccine among university instructors, bank employees, and primary and secondary school teachers in southern Ethiopia. Therefore, the federal ministry of health, Ethiopian food and drug controlling agency, the media, and all other concerned organizations should create increased awareness about the safety/side effects issues and the need to take the vaccine. (© 2021 Zewude and Habtegiorgis.)</p> |

| Year | Author(s)                                                                                                                                                                      | Title                                                                                                                       | Journal                   | Abstract                                                                                                                                                                                                                                                                                                                                                                                                                                                                                                                                                                                                                                                                                                                                                                                                                                                                                                                                                                                                                                                                                                                                                                                                                                                                                                                                                                                                                                                                                                                                                                                                                                                                                                                                                                                                                                                                                                                                                                                                                                                                                                                                                                                                                                                                                                                        |
|------|--------------------------------------------------------------------------------------------------------------------------------------------------------------------------------|-----------------------------------------------------------------------------------------------------------------------------|---------------------------|---------------------------------------------------------------------------------------------------------------------------------------------------------------------------------------------------------------------------------------------------------------------------------------------------------------------------------------------------------------------------------------------------------------------------------------------------------------------------------------------------------------------------------------------------------------------------------------------------------------------------------------------------------------------------------------------------------------------------------------------------------------------------------------------------------------------------------------------------------------------------------------------------------------------------------------------------------------------------------------------------------------------------------------------------------------------------------------------------------------------------------------------------------------------------------------------------------------------------------------------------------------------------------------------------------------------------------------------------------------------------------------------------------------------------------------------------------------------------------------------------------------------------------------------------------------------------------------------------------------------------------------------------------------------------------------------------------------------------------------------------------------------------------------------------------------------------------------------------------------------------------------------------------------------------------------------------------------------------------------------------------------------------------------------------------------------------------------------------------------------------------------------------------------------------------------------------------------------------------------------------------------------------------------------------------------------------------|
| 2022 | C. Kassa Mekonnen, N. Gizaw Demissie, Z. Wako Beko, Y. Mulu Ferede and H. Kindie Abate                                                                                         | Intent to get vaccinated against COVID-19 pandemic and its associated factors among adults with a chronic medical condition | Int J Afr Nurs Sci        | <p>BACKGROUND: Vaccination intent is defined as the willingness to get vaccinated against a COVID-19 pandemic in a situation where the vaccine is available at no cost. Nevertheless, even with the availability of COVID-19 vaccines, some part of the public is not expected to get vaccinated, mainly due to a phenomenon known as vaccine hesitancy or lack of intention. Furthermore, there is little information available on the intention of people with chronic medical conditions about the COVID-19 vaccines in Ethiopia. OBJECTIVE: The study aimed to assess the intent to get vaccinated against COVID-19 and its associated factors among adults with a chronic medical condition. METHOD: An institutional-based cross-sectional study was conducted from February 15 to March 15, 2021. Simple random sampling was employed to get representative samples. Data were collected by using a structured questionnaire through face to face interviews. The data were entered by Epi Info version 7 and analyzed with SPSS version 20. The data were analyzed by using binary logistic regression. Those variables with a P-value of <math>\leq 0.05</math> were considered significantly associated with the outcome variable. RESULT: In this study, 423 study participants took part with a response rate of 100%. The mean age of the study participants was 50.07 (SD <math>\pm</math> 13.7) with a range of 18-85 years. The intention to get vaccinated against the COVID-19 pandemic was 63.8% [95% CI (58.6-68.2)]. In the multivariable analysis the variables, retiring from the job was [AOR = 2.65, 95% CI (1.02-10.35)], having health insurance coverage [AOR = 1.38, 95%CI (1.04-3.65)], being in the high socio-demographic status [AOR = 1.67, 95%CI (1.01-2.78)], being confident with the Country's health care system [AOR = 2.00, 95%CI (1.15-3.49)], and having good knowledge about COVID-19 [AOR = 6.59, 95% CI (4.02-10.78)] were significant predictors of intent to get vaccinated against COVID-19 pandemic compared. CONCLUSION: The intention of getting vaccinated against the COVID-19 pandemic was relatively low. There has to be a great effort by the health caregivers as well as the government to increase vaccination intake, particularly for these priority groups.</p> |
| 2022 | C. S. Wiysonge, S. M. Alobwede, P. D. C. Katoto, E. B. Kidzeru, E. N. Lumngwena, S. Cooper, R. Goliath, A. Jackson and M. S. Shey                                              | COVID-19 vaccine acceptance and hesitancy among healthcare workers in South Africa                                          | Expert Review of Vaccines | <p>BACKGROUND We assessed willingness to accept vaccination against coronavirus disease 2019 (COVID-19) among healthcare workers(HCWs) at the start of South Africa's vaccination roll-out. RESEARCH DESIGN AND METHODS We conducted a cross-sectional survey among HCWs in Cape Town in March-May 2021 and assessed predictors of vaccination intentions. RESULTS We recruited 395 participants; 64% women, 49% nurses, and 13% physicians. Of these, 233(59.0%) would accept and 163 (41.0%) were vaccine hesitant i.e. would either refuse or were unsure whether they would accept COVID-19 vaccination. People who did not trust that COVID-19 vaccines are effective were the most hesitant (<math>p = 0.038</math>). Older participants and physicians were more likely to accept vaccination than younger participants (<math>p &lt; 0.01</math>) and other HCWs (<math>p = 0.042</math>) respectively. Other predictors of vaccine acceptance were trust that vaccines are compatible with religion (<math>p &lt; 0.001</math>), consideration of benefits and risks of vaccination (<math>p &lt; 0.001</math>), willingness to be vaccinated to protect others (<math>p &lt; 0.001</math>), and viewing vaccination as a collective action for COVID-19 control (<math>p = 0.029</math>). CONCLUSIONS COVID-19 vaccine hesitancy is high among HCWs in Cape Town. Reducing this would require trust-building interventions, including tailored education.</p>                                                                                                                                                                                                                                                                                                                                                                                                                                                                                                                                                                                                                                                                                                                                                                                                                                                         |
| 2022 | Chizoba Wonodi, Chisom Obi-Jeff, Funmilayo Adewumi, Somto Chloe Keluo-Udeke, Rachel Gur-Arie, Carleigh Krubiner, Elana Felice Jaffe, Tobi Bamiduro, Ruth Karron and Ruth Faden | Conspiracy theories and misinformation about COVID-19 in Nigeria: Implications for vaccine demand generation communications | Vaccine                   |                                                                                                                                                                                                                                                                                                                                                                                                                                                                                                                                                                                                                                                                                                                                                                                                                                                                                                                                                                                                                                                                                                                                                                                                                                                                                                                                                                                                                                                                                                                                                                                                                                                                                                                                                                                                                                                                                                                                                                                                                                                                                                                                                                                                                                                                                                                                 |

1  
2  
3  
4  
5  
6  
7  
8  
9  
10  
11  
12  
13  
14  
15  
16  
17  
18  
19  
20  
21  
22  
23  
24  
25  
26  
27  
28  
29  
30  
31  
32  
33  
34  
35  
36  
37  
38  
39  
40  
41  
42  
43  
44  
45  
46

| Year | Author(s)                                                            | Title                                                                                    | Journal  | Abstract                                                                                                                                                                                                                                                                                                                                                                                                                                                                                                                                                                                                                                                                                                                                                                                                                                                                                                                                                                                                                                                                                                                                                                                                                                                                                                                                                                                                                                                                                                                                                                                                                                                                                                                                                                                                                                                                                                                                                                                                                                                                                                                                                                                                                                                |
|------|----------------------------------------------------------------------|------------------------------------------------------------------------------------------|----------|---------------------------------------------------------------------------------------------------------------------------------------------------------------------------------------------------------------------------------------------------------------------------------------------------------------------------------------------------------------------------------------------------------------------------------------------------------------------------------------------------------------------------------------------------------------------------------------------------------------------------------------------------------------------------------------------------------------------------------------------------------------------------------------------------------------------------------------------------------------------------------------------------------------------------------------------------------------------------------------------------------------------------------------------------------------------------------------------------------------------------------------------------------------------------------------------------------------------------------------------------------------------------------------------------------------------------------------------------------------------------------------------------------------------------------------------------------------------------------------------------------------------------------------------------------------------------------------------------------------------------------------------------------------------------------------------------------------------------------------------------------------------------------------------------------------------------------------------------------------------------------------------------------------------------------------------------------------------------------------------------------------------------------------------------------------------------------------------------------------------------------------------------------------------------------------------------------------------------------------------------------|
| 2022 | Christoph Strupat, Zemzem Shigute, Arjun S. Bedi and Matthias Rieger | Willingness to take COVID-19 vaccination in low-income countries: Evidence from Ethiopia | PLoS ONE | Background: In low-income countries, vaccination campaigns are lagging, and evidence on vaccine acceptance, a crucial public health planning input, remains scant. This is the first study that reports willingness to take COVID-19 vaccines and its socio-demographic correlates in Ethiopia, Africa's second most populous country. Methods: The analysis is based on a nationally representative survey data of 2,317 households conducted in the informal economy in November 2020. It employs two logistic regression models where the two outcome variables are (i) a household head's willingness to take a COVID-19 vaccine or not, and (ii) if yes if they would also hypothetically pay (an unspecified amount) for it or not. Predictors include age, gender, education, marital status, income category, health insurance coverage, sickness due to COVID-19, chronic illness, trust in government, prior participation in voluntary activities, urban residence. Results: Willingness to take the vaccine was high (88%) and significantly associated with COVID-19 cases in the family, trust in government and pro-social behavior. All other predictors such as gender, education, income, health insurance, chronic illness, urban residence did not significantly predict vaccine willingness at the 5% level. Among those willing to take the vaccine, 33% also answered that they would hypothetically pay (an unspecified amount) for it, an answer that is significantly associated with trust in government, health insurance coverage and income. Conclusion: The results highlight both opportunities and challenges. There is little evidence of vaccine hesitancy in Ethiopia among household heads operating in the informal economy. The role played by trust in government and pro-social behavior in motivating this outcome suggests that policy makers need to consider these factors in the planning of COVID-19 vaccine campaigns in order to foster vaccine uptake. At the same time, as the willingness to hypothetically pay for a COVID-19 vaccine seems to be small, fairly-priced vaccines along with financial support are also needed to ensure further uptake of COVID-19 vaccines. [ABSTRACT FROM AUTHOR] |

For peer review only

| Year | Author(s)                                                                                                                      | Title                                                                                                | Journal                       | Abstract                                                                                                                                                                                                                                                                                                                                                                                                                                                                                                                                                                                                                                                                                                                                                                                                                                                                                                                                                                                                                                                                                                                                                                                                                                                                                                                                                                                                                                                                                                                                                                                                                                                                                                                                                                                                                                                                                                                                                                                                                                                                                                                                                                                                                                                                                                                                                                                                                                                                                                                                                                                                                                                                                                      |
|------|--------------------------------------------------------------------------------------------------------------------------------|------------------------------------------------------------------------------------------------------|-------------------------------|---------------------------------------------------------------------------------------------------------------------------------------------------------------------------------------------------------------------------------------------------------------------------------------------------------------------------------------------------------------------------------------------------------------------------------------------------------------------------------------------------------------------------------------------------------------------------------------------------------------------------------------------------------------------------------------------------------------------------------------------------------------------------------------------------------------------------------------------------------------------------------------------------------------------------------------------------------------------------------------------------------------------------------------------------------------------------------------------------------------------------------------------------------------------------------------------------------------------------------------------------------------------------------------------------------------------------------------------------------------------------------------------------------------------------------------------------------------------------------------------------------------------------------------------------------------------------------------------------------------------------------------------------------------------------------------------------------------------------------------------------------------------------------------------------------------------------------------------------------------------------------------------------------------------------------------------------------------------------------------------------------------------------------------------------------------------------------------------------------------------------------------------------------------------------------------------------------------------------------------------------------------------------------------------------------------------------------------------------------------------------------------------------------------------------------------------------------------------------------------------------------------------------------------------------------------------------------------------------------------------------------------------------------------------------------------------------------------|
| 2021 | D. R. Terefa, A. T. Shama, B. R. Feyisa, A. E. Desisa, E. T. Geta, M. C. Cheme and A. T. Edosa                                 | COVID-19 Vaccine Uptake and Associated Factors Among Health Professionals in Ethiopia                | Infection and Drug Resistance | Background: Ethiopia has received 2.2 million doses of COVID-19 vaccine from the COVID-19 Vaccines Global Access (COVAX) facility and planned to vaccinate 20% of its population by the end of 2021. However, evidence on the current uptake of the vaccine in our country is scanty. Therefore, this study aimed to assess COVID-19 vaccine uptake and associated factors among health professionals in Ethiopia. Methods: A national online cross-sectional E-survey was conducted on COVID-19 vaccine Uptake and associated factors among health professionals in Ethiopia from June 1 to 30, 2021. A semi-structured questionnaire was created on Google forms and disseminated online. The snowball sampling technique through the authors' network with Ethiopian residents on the popular social media like Facebook, telegram, and email was used. Descriptive statistics were performed. Multivariable logistic regression analysis was performed using Statistical Package for Social Sciences version 25, and all variables with P-value <0.05 and adjusted odds ratio at 95% CI were used to declare the predictors of the outcome variable. Results: A total of 522 health professionals participated in the survey, of which about 324 (62.1%) of them were vaccinated with any of the COVID-19 vaccines at least once. The study indicated that COVID-19 vaccine uptake was associated with age range from 35 to 44 years [AOR = 12.97, 95% CI: 2.36–71.21], age beyond 45 years [AOR = 18.95, 95% CI = 2.04–36.29], being male [AOR = 2.91, 95% CI = 1.05,8.09], being only an academician [AOR = 0.23, 95% CI: 0.10–0.49], academicians working in University hospitals [AOR = 0.19, 95% CI: 0.05–0.83], perceiving their family as healthy [AOR = 4.40, 95% CI: 2.21– 8.75], no history of receiving other vaccine before as an adult [AOR = 4.07, 95% CI: 2.07– 8.01] and no history of contact with confirmed COVID-19 patients or clients [AOR = 0.42, 95% CI: 0.20–0.86]. Conclusion: The study found that COVID-19 vaccine uptake among health professionals was low. This was not sufficient to achieve herd immunity as at least nine out of ten health professionals are required for herd immunity. Ages, sex, place of work, perceived family health status, previous experience of receiving a vaccine as an adult and history of contact with COVID-19 clients or patients were the factors that influence the vaccine uptake among health professionals in Ethiopia. Hence, decision makers and health managers should consider instituting mandatory vaccination for health professionals and design strategies for the provision of the vaccine. © 2021 Rikitu Terefa et al. |
| 2022 | D. Yilma, R. Mohammed, S. Getahun Abdela, W. Enbiale, F. Seifu, M. Pareyn, L. Liesenborghs, J. van Griensven and S. van Henten | COVID-19 vaccine acceptability among health care workers in Ethiopia: Do we practice what we preach? | Trop Med Int Health           | OBJECTIVE: We assessed health care workers (HCWs) COVID-19 vaccine acceptability in Ethiopia. METHODS: We carried out a cross sectional survey from February to April 2021 in HCWs from five teaching hospitals. HCWs were selected using convenient sampling and data were collected through a survey link. Descriptive analysis and mixed-effect logistic regression was performed. A total of 1,314 HCWs participated in the study. RESULTS: We found that 25.5% (n=332) of the HCWs would not accept a COVID-19 vaccine and 20.2% (n=264) were not willing to recommend COVID-19 vaccination to others. Factors associated with vaccine non-acceptance were female sex (AOR=1.8; 95% CI: 1.3-2.5), the perception that vaccines are unsafe (AOR=15.0; 95% CI: 8.7-25.9), not considering COVID-19 as health risk (AOR=4.4; 95% CI: 2.0-9.5) and being unconcerned about contracting COVID-19 at work (AOR=3.5; 95% CI: 1.5-8.4). Physicians were more willing to accept vaccination than other HCWs. Higher vaccine acceptability was also noted with increasing age. Participants most often indicated safety concerns as the determining factor on their decision to get vaccinated or not. CONCLUSION: Overall, a quarter of HCWs would not accept a COVID-19 vaccine. Communications and trainings should address vaccine safety concerns. Additionally, emphasis should be given to showing current and future impact of COVID-19 on the personal, public and country level unless control efforts are improved. Interventions aimed to increase vaccine uptake should focus their efforts on younger and non-physician HCWs.                                                                                                                                                                                                                                                                                                                                                                                                                                                                                                                                                                                                                                                                                                                                                                                                                                                                                                                                                                                                                                                                        |
| 2021 | Ekaete Alice Tobin, Martha Okonofua, Azuka Adeke and Andrew Obi                                                                | Willingness to accept a COVID-19 vaccine in Nigeria: a population-based cross-sectional study        | Cent Afr J Public Health      |                                                                                                                                                                                                                                                                                                                                                                                                                                                                                                                                                                                                                                                                                                                                                                                                                                                                                                                                                                                                                                                                                                                                                                                                                                                                                                                                                                                                                                                                                                                                                                                                                                                                                                                                                                                                                                                                                                                                                                                                                                                                                                                                                                                                                                                                                                                                                                                                                                                                                                                                                                                                                                                                                                               |



| Year | Author(s)                                                                                                                                                                                                                         | Title                                                                                                              | Journal                                     | Abstract                                                                                                                                                                                                                                                                                                                                                                                                                                                                                                                                                                                                                                                                                                                                                                                                                                                                                                                                                                                                                                                                                                                                                                                                                                                                                                                                                                                                                                                                                                                                                                                                                                                                                                                                                                                                                                                                           |
|------|-----------------------------------------------------------------------------------------------------------------------------------------------------------------------------------------------------------------------------------|--------------------------------------------------------------------------------------------------------------------|---------------------------------------------|------------------------------------------------------------------------------------------------------------------------------------------------------------------------------------------------------------------------------------------------------------------------------------------------------------------------------------------------------------------------------------------------------------------------------------------------------------------------------------------------------------------------------------------------------------------------------------------------------------------------------------------------------------------------------------------------------------------------------------------------------------------------------------------------------------------------------------------------------------------------------------------------------------------------------------------------------------------------------------------------------------------------------------------------------------------------------------------------------------------------------------------------------------------------------------------------------------------------------------------------------------------------------------------------------------------------------------------------------------------------------------------------------------------------------------------------------------------------------------------------------------------------------------------------------------------------------------------------------------------------------------------------------------------------------------------------------------------------------------------------------------------------------------------------------------------------------------------------------------------------------------|
| 2021 | Elizabeth O. Oduwole, Tonya M. Esterhuizen, Hassan Mahomed and Charles S. Wiysonge                                                                                                                                                | Estimating Vaccine Confidence Levels among Healthcare Staff and Students of a Tertiary Institution in South Africa | Vaccines                                    | Healthcare workers were the first group scheduled to receive COVID-19 vaccines when they became available in South Africa. Therefore, estimating vaccine confidence levels and intention to receive COVID-19 vaccines among healthcare workers ahead of the national vaccination roll-out was imperative. We conducted an online survey from 4 February to 7 March 2021, to assess vaccine sentiments and COVID-19 vaccine intentions among healthcare staff and students at a tertiary institution in South Africa. We enrolled 1015 participants (74.7% female). Among the participants, 89.5% (confidence interval (CI) 87.2-91.4) were willing to accept a COVID-19 vaccine, 95.4% (CI 93.9-96.6) agreed that vaccines are important for them, 95.4% (CI 93.8-96.6) that vaccines are safe, 97.4% (CI 96.2-98.3) that vaccines are effective, and 96.1% (CI 94.6-97.2) that vaccines are compatible with religion. Log binomial regression revealed statistically significant positive associations between COVID-19 vaccine acceptance and the belief that vaccines are safe (relative risk (RR) 32.2, CI 4.67-221.89), effective (RR 21.4, CI 3.16-145.82), important for children (RR 3.5, CI 1.78-6.99), important for self (RR 18.5, CI 4.78-71.12), or compatible with religion (RR 2.2, CI 1.46-3.78). The vaccine confidence levels of the study respondents were highly positive. Nevertheless, this could be further enhanced by targeted interventions.                                                                                                                                                                                                                                                                                                                                                                                                             |
| 2021 | F. A. Gbeasor-Komlanvi, K. A. Afanvi, Y. R. Konu, Y. Agbobli, A. J. Sadio, M. K. Tchankoni, W. I. C. Zida-Compaore, J. Nayo-Apetsianyi, S. Agoro, A. Lambokale, D. Nyametso, T. N'Tapi, K. Aflagah, M. Mijiyawa and D. K. Ekouevi | Prevalence and factors associated with COVID-19 vaccine hesitancy in health professionals in Togo, 2021            | Public health in practice (Oxford, England) | Objectives: The aim of this study was to assess the prevalence and factors associated with COVID-19 vaccine hesitancy among health professionals (HPs) in Togo.; Study Design: Cross-sectional study.; Methods: The study was conducted between 24 February and 3 March 2021 among HPs in Togo. Data on sociodemographic characteristics and intention of vaccination were collected using an online questionnaire. Willingness to get vaccinated against COVID-19 was assessed using a single item: "Would you be willing to be vaccinated against COVID-19?". Responses were grouped into three categories: acceptance ( Yes, I will get vaccinated ), hesitancy ( Not decided yet ) and refusal ( No ). Multinomial regression analyses were performed to assess factors associated with vaccine hesitancy or refusal.; Results: A total of 1115 HPs (79.1% male) with a median age of 35 years were enrolled in the study. Vaccine acceptance, hesitancy and refusal were 44.1%, 32.2% and 23.7%, respectively. Female gender was associated with an increased risk of hesitancy (adjusted odds ratio [aOR] = 1.93; p = 0.005) and refusal (aOR = 1.77; p = 0.005). Participant age $\geq$ 50 years, having a personal history of COVID-19 infection and a good knowledge of COVID-19 vaccination were factors that reduced the risk of refusal [(aOR = 0.30; p < 0.001), (aOR = 0.43; p = 0.031) and (aOR = 0.62; p = 0.020)] or hesitancy [(aOR = 0.53; p = 0.005), (aOR = 0.13; p < 0.001) and (aOR = 0.35; p < 0.001)] of the vaccine.; Conclusions: Acceptance of the COVID-19 vaccine before the vaccination campaign was mixed among HPs, especially young HPs. Sensitisation and information campaigns should be reinforced to combat misinformation and increase COVID-19 vaccination acceptance in the context of the ongoing global pandemic. (© 2021 The Authors.) |



| Year | Author(s)                                                                                                                                                                                            | Title                                                                                   | Journal                                    | Abstract                                                                                                                                                                                                                                                                                                                                                                                                                                                                                                                                                                                                                                                                                                                                                                                                                                                                                                                                                                                                                                                                                                                                                                                                                                                                                                                                                                                                                                                                                                                                                                                                                                                                                                                                                                                                                                                                                                                                                                                                                                                                                                                                                                         |
|------|------------------------------------------------------------------------------------------------------------------------------------------------------------------------------------------------------|-----------------------------------------------------------------------------------------|--------------------------------------------|----------------------------------------------------------------------------------------------------------------------------------------------------------------------------------------------------------------------------------------------------------------------------------------------------------------------------------------------------------------------------------------------------------------------------------------------------------------------------------------------------------------------------------------------------------------------------------------------------------------------------------------------------------------------------------------------------------------------------------------------------------------------------------------------------------------------------------------------------------------------------------------------------------------------------------------------------------------------------------------------------------------------------------------------------------------------------------------------------------------------------------------------------------------------------------------------------------------------------------------------------------------------------------------------------------------------------------------------------------------------------------------------------------------------------------------------------------------------------------------------------------------------------------------------------------------------------------------------------------------------------------------------------------------------------------------------------------------------------------------------------------------------------------------------------------------------------------------------------------------------------------------------------------------------------------------------------------------------------------------------------------------------------------------------------------------------------------------------------------------------------------------------------------------------------------|
| 2021 | F. Shiferie, O. Sada, T. Fenta, M. Kaba and A. M. Fentie                                                                                                                                             | Exploring reasons for COVID-19 vaccine hesitancy among healthcare providers in Ethiopia | Pan Afr Med J                              | <p>INTRODUCTION: the World Health Organization has identified vaccine hesitancy as one of the top ten threats to global health. The purpose of this study was to explore factors contributing to COVID-19 vaccine hesitancy among healthcare providers, their perspectives regarding vaccine uptake by the public and their recommendations to improve vaccine uptake in Ethiopia. METHODS: a phenomenological qualitative study was conducted among purposively selected healthcare providers working in the Ministry of Health (MoH), regulatory authority, public and private hospitals and health centres who hesitated to take the COVID-19 vaccine in Addis Ababa, Ethiopia in June 2021. A total of twenty in-depth interviews were conducted using a semi-structured open-ended interview guide. Participants included nurses, physicians, pharmacists, health officers, Medical Laboratory technologists and midwives. A qualitative content analysis approach was chosen to analyse the data. RESULTS: all the participants agreed (n=20) that lack of consistent information and inadequate evidence about COVID-19 vaccine safety, efficacy and quality were the main reasons for COVID-19 vaccine hesitancy. History of perceived and confirmed COVID-19 infection history, misinformation, religious views, unknown short and long-term effects of the vaccine and undefined length of time of vaccine's protection were also other reasons mentioned by the participants. CONCLUSION: healthcare providers were hesitant toward COVID-19 vaccine mainly due to lack of clear evidence regarding the vaccine's short and long-term safety, efficacy and quality profiles. Hence, the long-term safety and efficacy of the vaccine should be extensively studied and evidence dissemination and communication should be clear and transparent.</p>                                                                                                                                                                                                                                                                                                                  |
| 2021 | Felix Bongomin, Ronald Olum, Irene Andia-Biraro, Frederick Nelson Nakwagala, Khalid Hudow Hassan, Dianah Rhoda Nassozi, Mark Kaddumukasa, Pauline Byakika-Kibwika, Sarah Kiguli and Bruce J. Kirenga | COVID-19 vaccine acceptance among high-risk populations in Uganda                       | Therapeutic advances in infectious disease | <p>Background: Immunization is an important strategy for controlling the COVID-19 pandemic. COVID-19 vaccination was recently launched in Uganda, with prioritization to healthcare workers and high-risk individuals. In this study, we aimed to determine the acceptability of COVID-19 vaccine among persons at high risk of COVID-19 morbidity and mortality in Uganda.; Methods: Between 29 March and 14 April 2021, we conducted a cross-sectional survey consecutively recruiting persons at high risk of severe COVID-19 (diabetes mellitus, HIV and cardiovascular disease) attending Kiruddu National Referral Hospital outpatient clinics. A trained research nurse administered a semi-structured questionnaire assessing demographics, COVID-19 vaccine related attitudes and acceptability. Descriptive statistics, bivariate and multivariable analyses were performed using STATA 16.; Results: A total of 317 participants with a mean age <math>51.5 \pm 14.1</math> years were recruited. Of this, 184 (60.5%) were female. Overall, 216 (70.1%) participants were willing to accept the COVID-19 vaccine. The odds of willingness to accept COVID-19 vaccination were four times greater if a participant was male compared with if a participant was female [adjusted odds ratio (AOR): 4.1, 95% confidence interval (CI): 1.8-9.4, <math>p = 0.00</math>]. Participants who agreed (AOR: 0.04, 95% CI: 0.01-0.38, <math>p = 0.003</math>) or strongly agreed (AOR: 0.04, 95% CI: 0.01-0.59, <math>p = 0.005</math>) that they have some immunity against COVID-19 were also significantly less likely to accept the vaccine. Participants who had a history of vaccination hesitancy for their children were also significantly less likely to accept the COVID-19 vaccine (AOR: 0.1, 95% CI: 0.01-0.58, <math>p = 0.016</math>); Conclusion: The willingness to receive a COVID-19 vaccine in this group of high-risk individuals was comparable to the global COVID-19 vaccine acceptance rate. Increased sensitization, myth busting and utilization of opinion leaders to encourage vaccine acceptability is recommended. (© The Author(s), 2021.)</p> |

| Year | Author(s)                                                                                  | Title                                                                                                                                                                | Journal               | Abstract                                                                                                                                                                                                                                                                                                                                                                                                                                                                                                                                                                                                                                                                                                                                                                                                                                                                                                                                                                                                                                                                                                                                                                                                                                                                                                                                                                                                                                                                                                                                                                                                                                                                                                                                                                                                                                                                                                                                                                                                                                                                                                                                                                                                                                                                                                                                                                                                                                                                                                          |
|------|--------------------------------------------------------------------------------------------|----------------------------------------------------------------------------------------------------------------------------------------------------------------------|-----------------------|-------------------------------------------------------------------------------------------------------------------------------------------------------------------------------------------------------------------------------------------------------------------------------------------------------------------------------------------------------------------------------------------------------------------------------------------------------------------------------------------------------------------------------------------------------------------------------------------------------------------------------------------------------------------------------------------------------------------------------------------------------------------------------------------------------------------------------------------------------------------------------------------------------------------------------------------------------------------------------------------------------------------------------------------------------------------------------------------------------------------------------------------------------------------------------------------------------------------------------------------------------------------------------------------------------------------------------------------------------------------------------------------------------------------------------------------------------------------------------------------------------------------------------------------------------------------------------------------------------------------------------------------------------------------------------------------------------------------------------------------------------------------------------------------------------------------------------------------------------------------------------------------------------------------------------------------------------------------------------------------------------------------------------------------------------------------------------------------------------------------------------------------------------------------------------------------------------------------------------------------------------------------------------------------------------------------------------------------------------------------------------------------------------------------------------------------------------------------------------------------------------------------|
| 2021 | G. Asmare, K. Abebe, N. Atnafu, G. Asnake, A. Yeshambel, E. Alem, E. Chekol and T. Asmamaw | Behavioral intention and its predictors toward COVID-19 vaccination among people most at risk of exposure in Ethiopia: applying the theory of planned behavior model | Hum Vaccin Immunother | <p>Acceptance of a vaccine or hesitancy has great public health implications as these partly determine the extent to which people are exposed to infections that could have otherwise been prevented. There is a high need for a more updated understanding of the behavioral intention of the public toward COVID-19 vaccines and associated factors in light of the COVID-19 pandemic to give appropriate public health messages or actions. Thus, the study aimed to assess behavioral intention and its predictors toward COVID-19 vaccine among people most at risk of exposure in Ethiopia. A population-based anonymous online survey was conducted on individuals aged greater than 18 years from May 01, 2021 to June 30, 2021. The data were collected using a convenient sampling method through an online self-administered, structured questionnaire that was created onto Google survey tool (Google Forms) and disseminated to the public on different social media channels through online sharable platforms. Descriptive statistics were done. Bivariate and multivariable logistic regression was done to show the association of behavioral intention toward the COVID-19 vaccine. The associations of variables were declared with the use of 95% CI and P-value. A total of 1080 participants were included in this survey. Seven hundred one (64.9%) of the respondents had a behavioral intention to receive the COVID-19 vaccine. Males (AOR = 1.41 (95% CI = 1.004-2.53)), degree in level of education (AOR = 0.815 (95% CI = 0.254-0.916)), good knowledge (AOR = 4.21 (95% CI = 2.871-6.992)), attitude (AOR = 2.78 (95% CI = 1.654-4.102)), subjective norm (AOR = 1.214 (95% CI = 1.008-4.309)) and perceived behavioral control (AOR = 3.531 (95% CI = 1.689-5.201)) were found to be significantly associated with behavioral intention toward COVID-19 vaccine. Generally, the prevalence of behavioral intention in Ethiopia is low. Males, degree level of education, knowledge about vaccine, attitude toward vaccine subjective norm and perceived behavioral control were found to be significantly associated with intention to receive COVID-19 vaccine. Health education and communication from government sources are very crucial methods to alleviate the negative attitude, poor knowledge, and action need to improve or change the attitude and behavior of influential people within the community or organization to improve intention to take the vaccine.</p> |
| 2021 | G. Murewanhema, T. V. Burukai, B. Chireka and E. Kunonga                                   | Implementing national COVID-19 vaccination programmes in sub-Saharan Africa- early lessons from Zimbabwe: a descriptive cross-sectional study                        | Pan Afr Med J         | <p>INTRODUCTION: Zimbabwe was one of the first countries to run a national COVID-19 vaccination programme in Africa. Lessons learnt could inform the roll-out of similar programmes in sub-Saharan Africa. To describe the trends of uptake of the COVID-19 vaccines in the first three months (February - May 2021) of the Zimbabwe vaccination programme and the lessons learnt. METHODS: a secondary descriptive analysis of routinely available COVID-19 vaccination data extracted from the daily situation reports published by the Ministry of Health and Child Care. RESULTS: in the first three months of the programme, 1 020 078 doses were administered, with 675 678 being first doses and 344 400 were second doses. Using population estimates, at three months, 5.2% of the population had received at least one dose and 2.6% had received the full two doses. Uptake was initially slow, followed by a gradual, and subsequently an exponential increase. CONCLUSION: by the end of May 2021, Zimbabwe had rolled out one of the largest COVID-19 vaccination programmes in sub-Saharan Africa. The uptake followed a pattern and trend that is consistent with vaccine hesitancy reported in the literature, driven by a combination of confidence, complacency and convenience factors. The gradual increase in uptake followed a series of national and local community engagement programmes. The roll-out of similar programmes must recognise likely patterns of uptake across the population and ensure plans are in place to address vaccine hesitancy. The available data did not allow granular analysis to understand the demographics of people who participated in the programme, which is important for surveillance, targeted action, preventing inequalities and ensuring adequate and proportionate protection of residents prioritising the most vulnerable. Further analysis of the process, outcomes and impact of the programme will be helpful in informing the roll-out of similar programmes across Africa.</p>                                                                                                                                                                                                                                                                                                                                                                                                                                                         |

| Year | Author(s)                                                                                                                                         | Title                                                                                                                                                 | Journal                       | Abstract                                                                                                                                                                                                                                                                                                                                                                                                                                                                                                                                                                                                                                                                                                                                                                                                                                                                                                                                                                                                                                                                                                                                                                                                                                                                                                                                                                                                                                                                                                                                                                                                                                                                                                                                                                                                                                                                                                                                                                                                                                                                                                                                                                                                                                                                                                                                                               |
|------|---------------------------------------------------------------------------------------------------------------------------------------------------|-------------------------------------------------------------------------------------------------------------------------------------------------------|-------------------------------|------------------------------------------------------------------------------------------------------------------------------------------------------------------------------------------------------------------------------------------------------------------------------------------------------------------------------------------------------------------------------------------------------------------------------------------------------------------------------------------------------------------------------------------------------------------------------------------------------------------------------------------------------------------------------------------------------------------------------------------------------------------------------------------------------------------------------------------------------------------------------------------------------------------------------------------------------------------------------------------------------------------------------------------------------------------------------------------------------------------------------------------------------------------------------------------------------------------------------------------------------------------------------------------------------------------------------------------------------------------------------------------------------------------------------------------------------------------------------------------------------------------------------------------------------------------------------------------------------------------------------------------------------------------------------------------------------------------------------------------------------------------------------------------------------------------------------------------------------------------------------------------------------------------------------------------------------------------------------------------------------------------------------------------------------------------------------------------------------------------------------------------------------------------------------------------------------------------------------------------------------------------------------------------------------------------------------------------------------------------------|
| 2022 | H. Adedeji-Adenola, O. A. Olugbake and S. A. Adeosun                                                                                              | Factors influencing COVID-19 vaccine uptake among adults in Nigeria                                                                                   | PLoS One                      | <p>BACKGROUND: Emerging variants of Coronavirus disease 2019 (COVID-19) has claimed over 3000 lives in Nigeria and vaccination remains a means of reducing the death toll. Despite ongoing efforts by the government to ensure COVID-19 vaccination of most residents to attain herd immunity, myths and beliefs have adversely shaped the perception of most Nigerians, challenging the uptake of COVID-19 vaccine. This study aimed to assess the factors influencing the awareness, perception, and willingness to receive COVID-19 vaccine among Nigerian adults.</p> <p>METHODS: A cross-sectional online nationwide study was conducted from April to June 2021 among Nigerian adult population using the snowballing method. Descriptive analysis was used to summarise the data. Univariate and multivariate analysis was used to identify the predictors of COVID-19 uptake among the respondents. A p value &lt;0.05 was considered significant. RESULTS: A total of 1058 completed forms were analysed and 63.9% were females. The mean age was 40.8 years±12.2 years. Most of the respondents (740; 69.5%) had satisfactory awareness of the vaccination exercise. The media was the main source of information. Health workers reported higher level of awareness (aOR = 1.822, 95% CI: 1.388-2.524, p&lt;0.001). Respondents that are Christians and Muslims had better awareness compared to the unaffiliated (aOR = 6.398, 95% CI: 1.918-21.338, P = 0.003) and (aOR = 7.595, 95% CI: 2.280-25.301, p&lt;0.001) respectively. There is average score for perception statements (566; 53.2%) towards COVID-19 vaccination. Close to half of the respondents (44.2%) found the short period of COVID-19 production worrisome. Majority of the respondents were willing to get the vaccine (856; 80.9%). Those without a prior diagnosis of COVID-19 had a lower willingness to get vaccinated (aOR = 0.210 (95% CI: 0.082-0.536) P = 0.001).</p> <p>CONCLUSION: The study revealed a high level of awareness, willingness to receive the vaccine and moderate perception towards the vaccination activities. Influencing factors that significantly affects awareness were religion, occupation, education and prior diagnosis of COVID-19; for perception and willingness-occupation, and prior diagnosis of the COVID-19 were influencing factors.</p> |
| 2021 | Haimanot Abebe, Solomon Shitu and Ayenew Mose                                                                                                     | Understanding of COVID-19 vaccine knowledge, attitude, acceptance, and determinates of COVID-19 vaccine acceptance among adult population in Ethiopia | Infection and drug resistance |                                                                                                                                                                                                                                                                                                                                                                                                                                                                                                                                                                                                                                                                                                                                                                                                                                                                                                                                                                                                                                                                                                                                                                                                                                                                                                                                                                                                                                                                                                                                                                                                                                                                                                                                                                                                                                                                                                                                                                                                                                                                                                                                                                                                                                                                                                                                                                        |
| 2021 | J. D. Ditekemena, D. M. Nkamba, A. Mutwadi, H. M. Mavoko, J. N. Siewe Fodjo, C. Luhata, M. Obimpeh, S. Van Hees, J. B. Nachege and R. Colebunders | COVID-19 Vaccine Acceptance in the Democratic Republic of Congo: A Cross-Sectional Survey                                                             | Vaccines (Basel)              | <p>We investigated the level of willingness for COVID-19 vaccination in the Democratic Republic of Congo (DRC). Data were collected between 24 August 2020 and 8 September 2020 through an online survey. A total of 4131 responses were included; mean age of respondents was 35 years (standard deviation: 11.5); 68.4% were females; 71% had elementary or secondary school education. One fourth (24.1%) were convinced that COVID-19 did not exist. Overall, 2310 (55.9%) indicated they were willing to be vaccinated. In a multivariable regression model, belonging to the middle and high-income category (OR = 1.85, CI: 1.46-2.35 and OR = 2.91, CI: 2.15-3.93, respectively), being tested for COVID-19 (OR = 4.71, CI: 3.62-6.12; p &lt; 0.001), COVID-19 community vaccine acceptance (OR = 14.45, CI: 2.91-71.65; p = 0.001) and acknowledging the existence of COVID-19 (OR = 6.04, CI: 4.42-8.23; p &lt; 0.001) were associated with an increased willingness to be vaccinated. Being a healthcare worker was associated with a decreased willingness for vaccination (OR = 0.46, CI: 0.36-0.58; p &lt; 0.001). In conclusion, the current willingness for COVID-19 vaccination among citizens of the DRC is too low to dramatically decrease community transmission. Of great concern is the low intention of immunization among healthcare workers. A large sensitization campaign will be needed to increase COVID-19 vaccine acceptance.</p>                                                                                                                                                                                                                                                                                                                                                                                                                                                                                                                                                                                                                                                                                                                                                                                                                                                                                                      |

| Year | Author(s)                                                                                                                                        | Title                                                                                                                                    | Journal                         | Abstract                                                                                                                                                                                                                                                                                                                                                                                                                                                                                                                                                                                                                                                                                                                                                                                                                                                                                                                                                                                                                                                                                                                                                                                                                                                                                                                                                                                                                                                                                                                              |
|------|--------------------------------------------------------------------------------------------------------------------------------------------------|------------------------------------------------------------------------------------------------------------------------------------------|---------------------------------|---------------------------------------------------------------------------------------------------------------------------------------------------------------------------------------------------------------------------------------------------------------------------------------------------------------------------------------------------------------------------------------------------------------------------------------------------------------------------------------------------------------------------------------------------------------------------------------------------------------------------------------------------------------------------------------------------------------------------------------------------------------------------------------------------------------------------------------------------------------------------------------------------------------------------------------------------------------------------------------------------------------------------------------------------------------------------------------------------------------------------------------------------------------------------------------------------------------------------------------------------------------------------------------------------------------------------------------------------------------------------------------------------------------------------------------------------------------------------------------------------------------------------------------|
| 2021 | J. Dula, A. Mulhanga, A. Nhanombe, L. Cumbi, A. Júnior, J. Gwatsvaira, J. N. Siewe Fodjo, E. F. De Moura Villela, S. Chicumbe and R. Colebunders | Covid-19 vaccine acceptability and its determinants in mozambique: An online survey                                                      | Vaccines                        | A high worldwide SARS-CoV-2 vaccine coverage must be attained to stop the COVID-19 pandemic. In this study, we assessed the level of willingness of Mozambicans to be vaccinated against COVID-19. Data were collected between 11 and 20 March 2021, through a self-administered online survey. Of the 1878 respondents, 30.1% were healthcare workers, 58.3% were aged between 18 and 35 years, 60% were male, and 38.5% were single. Up to 43% had been tested for COVID-19 and 29% had tested positive. Overall vaccine acceptability was 71.4% (86.6% among healthcare workers, 64.8% among other respondents, $p < 0.001$ ). Reasons for vaccine hesitancy included: Fear of vaccine side effects (29.6%) and the belief that the vaccine is not effective (52%). The acceptability of the SARSCoV-2 vaccine increased with increasing vaccine efficacy. Using logistic regression, determinants for acceptability of the vaccine were: Older age, a past COVID-19 test, a concern of becoming (re)infected by COVID-19, having a chronic disease, and considering vaccination important for personal and community health. In conclusion, vaccine acceptability in Mozambique was relatively high among healthcare workers but significantly lower in the rest of the population. This suggests that there is a need to educate the general population about SARS-CoV-2 vaccination and its importance. © 2021 by the authors.                                                                                                  |
| 2020 | Jeffrey V. Lazarus, Katarzyna Wyka, Lauren Rauh, Kenneth Rabin, Scott Ratzan, Lawrence O. Gostin, Heidi J. Larson and Ayman El-Mohandes          | Hesitant or not? The association of age, gender, and education with potential acceptance of a COVID-19 vaccine: A country-level analysis | Journal of Health Communication | In December 2020, the first COVID-19 vaccines were approved. Despite more than 85 million reported cases and 1.8 million known deaths, millions worldwide say they may not accept it. This study assesses the associations of age, gender, and level of education with vaccine acceptance, from a random sample of 13,426 participants selected from 19 high-COVID-19 burden countries in June 2020. Based on univariable and multivariable logistic regression, several noteworthy trends emerged: women in France, Germany, Russia, and Sweden were significantly more likely to accept a vaccine than men in these countries. Older ( $\geq 50$ ) people in Canada, Poland, France, Germany, Sweden, and the UK were significantly more favorably disposed to vaccination than younger respondents, but the reverse trend held in China. Highly educated individuals in Ecuador, France, Germany, India, and the US reported that they will accept a vaccine, but higher education levels were associated with lower vaccination acceptance in Canada, Spain, and the UK. Heterogeneity by demographic factors in the respondents' willingness to accept a vaccine if recommended by employers were substantial when comparing responses from Brazil, Ecuador, France, India, Italy, Mexico, Poland, Russia, South Africa, South Korea, Sweden, and the US. This information should help public health authorities target vaccine promotion messages more effectively. (PsyInfo Database Record (c) 2021 APA, all rights reserved) |

| Year | Author(s)                                                                                                                                                                     | Title                                                                                                           | Journal                      | Abstract                                                                                                                                                                                                                                                                                                                                                                                                                                                                                                                                                                                                                                                                                                                                                                                                                                                                                                                                                                                                                                                                                                                                                                                                                                                                                                                                                                                                                                                                                                                                                                                                                                                                                                                                                                                                                                                                                                                                                                                                          |
|------|-------------------------------------------------------------------------------------------------------------------------------------------------------------------------------|-----------------------------------------------------------------------------------------------------------------|------------------------------|-------------------------------------------------------------------------------------------------------------------------------------------------------------------------------------------------------------------------------------------------------------------------------------------------------------------------------------------------------------------------------------------------------------------------------------------------------------------------------------------------------------------------------------------------------------------------------------------------------------------------------------------------------------------------------------------------------------------------------------------------------------------------------------------------------------------------------------------------------------------------------------------------------------------------------------------------------------------------------------------------------------------------------------------------------------------------------------------------------------------------------------------------------------------------------------------------------------------------------------------------------------------------------------------------------------------------------------------------------------------------------------------------------------------------------------------------------------------------------------------------------------------------------------------------------------------------------------------------------------------------------------------------------------------------------------------------------------------------------------------------------------------------------------------------------------------------------------------------------------------------------------------------------------------------------------------------------------------------------------------------------------------|
| 2021 | Jerome Nyhalah Dinga, Leontine Kouemou Sinda and Vincent P. K. Titanji                                                                                                        | Assessment of Vaccine Hesitancy to a COVID-19 Vaccine in Cameroonian Adults and Its Global Implication          | Vaccines                     | Since the outbreak of COVID-19 in December 2019, no global consensus treatment has been developed and generally accepted for the disease. However, eradicating the disease will require a safe and efficacious vaccine. In order to prepare for the eventual development of a safe and efficacious COVID-19 vaccine and to enhance its uptake, it is imperative to assess vaccine hesitancy in Cameroonians. After obtaining ethical clearance from the Institutional Review Board of the University of Buea, a questionnaire was administered (May-August 2020) to consenting adults either online or in person. A qualitative thematic analysis was done to analyze the participants' answers to the open questions. A deductive approach was used, that is, the codes and patterns according to the World Health Organization (WHO) Strategic Advisory Group of Experts (SAGE) Working Group Matrix of Determinants of vaccine hesitancy. The number of consenting adult Cameroonians who completed the questionnaire were 2512 (Two thousand five hundred and twelve). Vaccine hesitancy to a COVID-19 vaccine was 84.6% in Cameroonians. Using the WHO recommended Matrix of Determinant of Vaccine hesitancy, the most prominent determinants observed in this study were: Communication and Media Environment, Perception of pharmaceutical industry, Reliability and/or source of vaccine and cost. Most Cameroonians agree that even though there are benefits of a clinical trial, they will prefer it should be done out of the continent and involving African scientists for eventual acceptance and uptake. The concerns of safety, efficacy and confidence has to be addressed using a Public Engagement approach if a COVID-19 vaccine has to be administered successfully in Africa or Cameroon specifically. Since this study was carried out following WHO standards, its result can be compared to those of other studies carried out in different cultural settings using similar standards. |
| 2021 | Julio S Solís Arce, Shana S Warren, Niccolò F Meriggi, Alexandra Scacco, Nina McMurry, Maarten Voors, Georgiy Syunyaev, Aryn Abdul Malik, Samya Aboutajdine and Opeyemi Adejo | COVID-19 vaccine acceptance and hesitancy in low- and middle-income countries                                   | Nature medicine              |                                                                                                                                                                                                                                                                                                                                                                                                                                                                                                                                                                                                                                                                                                                                                                                                                                                                                                                                                                                                                                                                                                                                                                                                                                                                                                                                                                                                                                                                                                                                                                                                                                                                                                                                                                                                                                                                                                                                                                                                                   |
| 2021 | Kegnie Shitu, Maereg Wolde, Simegnew Handebo and Ayenew Kassie                                                                                                                | Acceptance and willingness to pay for COVID-19 vaccine among school teachers in Gondar City, Northwest Ethiopia | Tropical medicine and health |                                                                                                                                                                                                                                                                                                                                                                                                                                                                                                                                                                                                                                                                                                                                                                                                                                                                                                                                                                                                                                                                                                                                                                                                                                                                                                                                                                                                                                                                                                                                                                                                                                                                                                                                                                                                                                                                                                                                                                                                                   |

| Year | Author(s)                                                                                 | Title                                                                                                                                     | Journal  | Abstract                                                                                                                                                                                                                                                                                                                                                                                                                                                                                                                                                                                                                                                                                                                                                                                                                                                                                                                                                                                                                                                                                                                                                                                                                                                                                                                                                                                                                                                                                                                                                                                                                                                                                                                                                                                                                                                       |
|------|-------------------------------------------------------------------------------------------|-------------------------------------------------------------------------------------------------------------------------------------------|----------|----------------------------------------------------------------------------------------------------------------------------------------------------------------------------------------------------------------------------------------------------------------------------------------------------------------------------------------------------------------------------------------------------------------------------------------------------------------------------------------------------------------------------------------------------------------------------------------------------------------------------------------------------------------------------------------------------------------------------------------------------------------------------------------------------------------------------------------------------------------------------------------------------------------------------------------------------------------------------------------------------------------------------------------------------------------------------------------------------------------------------------------------------------------------------------------------------------------------------------------------------------------------------------------------------------------------------------------------------------------------------------------------------------------------------------------------------------------------------------------------------------------------------------------------------------------------------------------------------------------------------------------------------------------------------------------------------------------------------------------------------------------------------------------------------------------------------------------------------------------|
| 2021 | Lauren McAbee, Oscar Tapera and Mufaro Kanyangarara                                       | Factors Associated with COVID-19 Vaccine Intentions in Eastern Zimbabwe: A Cross-Sectional Study                                          | Vaccines | Vaccines are one of the most effective public health strategies to protect against infectious diseases, yet vaccine hesitancy has emerged as a global health threat. Understanding COVID-19 knowledge and attitudes and their association with vaccine intentions can help the targeting of strategies to increase vaccination uptake and achieve herd immunity. The goal of this study was to assess COVID-19 knowledge, attitudes, and behaviors, and identify factors associated with COVID-19 vaccine intentions among heads of households in Manicaland Province, Zimbabwe. A cross-sectional survey was conducted in May 2021 among 551 randomly selected households. Data were collected on socio-demographic characteristics, and knowledge, attitudes, and behaviors regarding COVID-19 and the vaccines. More than half (55.7%) of the respondents reported intending to vaccinate themselves or their households. Multivariate logistic regression indicated that the likelihood of vaccine intentions was most strongly associated with confidence in vaccine safety. Additionally, the odds of intending to get vaccinated were significantly higher among heads of households who were male, had a higher level of education, and identified vaccination and face mask usage as prevention measures. Among perceived motivators to vaccinate, recommendations from the World Health Organization and availability of the vaccine free of charge increased the likelihood of vaccine intentions, while country of vaccine manufacturer posed a barrier to vaccine intentions. As the vaccine rollout in Zimbabwe continues, efforts to increase COVID-19 vaccination coverage and achieve herd immunity should target females and less educated populations and be tailored to address concerns about vaccine safety and country of manufacturer. |
| 2022 | Lulin Zhou, Sabina Ampon-Wireko, Xinglong Xu, Prince Edwudzie Quansah and Ebenezer Larnyo | Media attention and Vaccine Hesitancy: Examining the mediating effects of Fear of COVID-19 and the moderating role of Trust in leadership | PLoS ONE | Vaccination has emerged as the most cost-effective public health strategy for maintaining population health, with various social and economic benefits. These vaccines, however, cannot be effective without widespread acceptance. The present study examines the effect of media attention on COVID-19 vaccine hesitancy by incorporating fear of COVID-19 as a mediator, whereas trust in leadership served as a moderator. An analytical cross-sectional study is performed among rural folks in the Wassa Amenfi Central of Ghana. Using a questionnaire survey, we were able to collect 3079 valid responses. The Smart PLS was used to estimate the relationship among the variables. The results revealed that media attention had a significant influence on vaccine hesitancy. Furthermore, the results showed that fear of COVID-19 played a significant mediating role in the relationship between media and vaccine hesitancy. However, trust in leadership had an insignificant moderating relationship on the fear of COVID-19 and vaccine hesitancy. The study suggests that the health management team can reduce vaccine hesitancy if they focus on lessening the negative impact of media and other antecedents like fear on trust in leadership. [ABSTRACT FROM AUTHOR]                                                                                                                                                                                                                                                                                                                                                                                                                                                                                                                                                                    |

| Year | Author(s)                                                                                                                                                                 | Title                                                                                                          | Journal         | Abstract                                                                                                                                                                                                                                                                                                                                                                                                                                                                                                                                                                                                                                                                                                                                                                                                                                                                                                                                                                                                                                                                                                                                                                                                                                                                                                                                                                                                                                                                                                             |
|------|---------------------------------------------------------------------------------------------------------------------------------------------------------------------------|----------------------------------------------------------------------------------------------------------------|-----------------|----------------------------------------------------------------------------------------------------------------------------------------------------------------------------------------------------------------------------------------------------------------------------------------------------------------------------------------------------------------------------------------------------------------------------------------------------------------------------------------------------------------------------------------------------------------------------------------------------------------------------------------------------------------------------------------------------------------------------------------------------------------------------------------------------------------------------------------------------------------------------------------------------------------------------------------------------------------------------------------------------------------------------------------------------------------------------------------------------------------------------------------------------------------------------------------------------------------------------------------------------------------------------------------------------------------------------------------------------------------------------------------------------------------------------------------------------------------------------------------------------------------------|
| 2021 | M. A. M. Ahmed, R. Colebunders, A. A. Gele, A. A. Farah, S. Osman, I. A. Guled, A. A. M. Abdullahi, A. M. Hussein, A. M. Ali and J. N. S. Fodjo                           | COVID-19 Vaccine Acceptability and Adherence to Preventive Measures in Somalia: Results of an Online Survey    | Vaccines        | Most countries are currently gravitating towards vaccination as mainstay strategy to quell COVID-19 transmission. Between December 2020 and January 2021, we conducted a follow-up online survey in Somalia to monitor adherence to COVID-19 preventive measures, and COVID-19 vaccine acceptability and reasons for vaccine hesitancy. Adherence was measured via a composite adherence score based on four measures (physical distancing, face mask use, hand hygiene, and mouth covering when coughing/sneezing). We analyzed 4543 responses (mean age: 23.5 ± 6.4 years, 62.4% males). The mean adherence score during this survey was lower than the score during a similar survey in April 2020. A total of 76.8% of respondents were willing to receive the COVID-19 vaccine. Flu-like symptoms were more frequently reported in the current survey compared to previous surveys. Multiple logistic regression showed that participants who experienced flu-like symptoms, those in the healthcare sector, and those with higher adherence scores had higher odds for vaccine acceptability while being a female reduced the willingness to be vaccinated. In conclusion, our data suggest that the decreasing adherence to COVID-19 preventive measures may have caused increased flu-like symptoms over time. COVID-19 vaccine acceptance in Somalia is relatively high but could be improved by addressing factors that contribute to vaccine hesitancy.                                                   |
| 2021 | M. G. Salomoni, Z. Di Valerio, E. Gabrielli, M. Montalti, D. Tedesco, F. Guaraldi and D. Gori                                                                             | Hesitant or not hesitant? A systematic review on global covid-19 vaccine acceptance in different populations   | Vaccines        | Vaccination currently appears to be the only strategy to contain the spread of COVID-19. At the same time, vaccine hesitancy (VH) could limit its efficacy and has, therefore, attracted the attention of Public Health Systems. This systematic review aimed at assessing anti-COVID-19 vaccine acceptance rates worldwide and at identifying populations more prone to vaccine hesitancy, for which specific interventions should be planned. PubMed database was searched using a purposely formulated string. One hundred out of the 9243 studies retrieved were considered pertinent and thus included in the analyses. VH rate was analyzed according to patient geographical origin, ethnicity, age, study setting, and method used for data collection; data from specific populations were separately analyzed. Overall, this study demonstrated significant differences in terms of VH in the general population and in the specific subgroups examined according to geographical, demographic factors, as well as associated comorbidities, underlining the need for purposely designed studies in specific populations from the different countries, to design targeted programs aimed at increasing awareness for confidence and complacency toward COVID-19 vaccines. © 2021 by the authors. Licensee MDPI, Basel, Switzerland.                                                                                                                                                                        |
| 2020 | M. Kabamba Nzaji, L. Kabamba Ngombe, G. Ngoie Mwamba, D. B. Banza Ndala, J. Mbidi Miema, C. Luhata Lungoyo, B. Lora Mwimba, A. Cikomola Mwana Bene and E. Mukamba Musenga | Acceptability of Vaccination Against COVID-19 Among Healthcare Workers in the Democratic Republic of the Congo | Pragmat Obs Res | PURPOSE: This study aims to estimate the acceptability of a future vaccine against COVID-19 and associated factors if offered in Congolese health-care workers (HCWs), since they have the highest direct exposure to the disease. PATIENTS AND METHODS: We conducted an analytical cross-sectional study among 23 Congolese referral hospitals, including three university hospitals, located in three towns from March through 30 April 2020. The main outcome variable was healthcare workers' acceptance of a future vaccine against COVID-19. The associated factors of vaccination willingness were identified through a logistic regression analysis. RESULTS: A sample of 613 HCWs participated in the study and completed the study questionnaire, including 312 (50.9%) men and 301 (49.1%) women. Only 27.7% of HCWs said that they would accept a COVID-19 vaccine if it was available. From the logistic regression analysis, male healthcare workers (ORa=1.17, 95% CI: 1.15-2.60), primarily doctors (ORa=1.59; 95% CI:1.03-2.44) and having a positive attitude towards a COVID-19 vaccine (ORa=11.49; 95% CI: 5.88-22.46) were significantly associated with reporting willingness to be vaccinated. CONCLUSION: For acceptability of vaccination against COVID-19 among others education among HCWs is crucial because health professionals' attitudes about vaccines are an important determinant of their own vaccine uptake and their likelihood of recommending the vaccine to their patients. |



| Year | Author(s)                                                                             | Title                                                                                                         | Journal                                | Abstract                                                                                                                                                                                                                                                                                                                                                                                                                                                                                                                                                                                                                                                                                                                                                                                                                                                                                                                                                                                                                                                                                                                                                                                                                                                                                                                                                                                                                                                                                                                                                                                                                                                                                                                                                                     |
|------|---------------------------------------------------------------------------------------|---------------------------------------------------------------------------------------------------------------|----------------------------------------|------------------------------------------------------------------------------------------------------------------------------------------------------------------------------------------------------------------------------------------------------------------------------------------------------------------------------------------------------------------------------------------------------------------------------------------------------------------------------------------------------------------------------------------------------------------------------------------------------------------------------------------------------------------------------------------------------------------------------------------------------------------------------------------------------------------------------------------------------------------------------------------------------------------------------------------------------------------------------------------------------------------------------------------------------------------------------------------------------------------------------------------------------------------------------------------------------------------------------------------------------------------------------------------------------------------------------------------------------------------------------------------------------------------------------------------------------------------------------------------------------------------------------------------------------------------------------------------------------------------------------------------------------------------------------------------------------------------------------------------------------------------------------|
| 2021 | M. Mesesle                                                                            | Awareness and attitude towards covid-19 vaccination and associated factors in ethiopia: Cross-sectional study | Infection and Drug Resistance          | Background: Coronavirus disease (COVID-19) is a deadly virus that continues to afflict many countries worldwide. The development of a COVID-19 vaccine to combat the disease's spread and devastating effects is still ongoing, and as the pandemic progresses, new, more effective vaccines are likely to be created. The aim of this study was to assess awareness and attitude towards COVID-19 vaccination in Ethiopia. Methods: A population-based cross-sectional e-survey was conducted among 425 participants from March 13, 2021 to April 10, 2021. The survey was conducted using a structured and self-reported questionnaire containing informed consent along with three sections (sociodemographic, awareness, and attitude); a multivariable logistic regression model was performed to determine the variables predicting awareness towards COVID-19 vaccinations. Results: The mean score of awareness was 4.3 (SD=1.1) out of 7, with the overall awareness of 40.8%, and the mean score of attitudes was 4.09 (SD=2.16) out of 9, with an overall "positive attitude" score of 24.2%. College and above educational level (AOR=2.21, 95% CI=1.32, 4.62), had access to mass media (AOR=4.75, 95% CI =2.74, 8.24), and urban residency (AOR=2.83, 95% C.I = 1.57, 5.09) were significantly associated with awareness towards COVID-19 vaccination. Conclusion: In Ethiopia, there is a poor knowledge toward COVID-19 vaccines, according to the current report. The findings indicate that authorities should implement an urgent health education program and disseminate more reliable information. Using the media, policymakers should take measures to ensure adequate awareness of COVID-19 vaccinations with various stakeholders. © 2021 Mesesle. |
| 2021 | M. T. J. Ansari and N. A. Khan                                                        | Worldwide COVID-19 vaccines sentiment analysis through twitter content                                        | Electronic Journal of General Medicine | One year during the pandemic of COVID 19, numerous viable possibilities have been created in worldwide efforts to create and disseminate a viable vaccine. The rapid development of numerous vaccinations is remarkable; generally, the procedure takes 8 to 15 years. The vaccination of a critical proportion of the global population, which is vital for containing the pandemic, is now facing a new set of hurdles, including hazardous new strains of the virus, worldwide competition over a shortage of doses, as well as public suspicion about the vaccinations. A safe and efficacious vaccine COVID-19 is borne fruit globally. There are presently more than a dozen vaccinations worldwide authorized; many more continue to be developed. This paper used COVID-19 vaccine related tweets to present an overview of the public's reactions on current vaccination drives by using thematic sentiment and emotional analysis, and demographics interpretation to people. Further, experiments were carried out for sentiment analysis in order to uncover fresh information about the effect of location and gender. Overall Tweets were generally negative in tone and a huge vaccination trend can be seen in global health perspectives, as evidenced by the analysis of the role of comprehensive science and research in vaccination. © 2021 by Author/s and Licensed by Modestum.                                                                                                                                                                                                                                                                                                                                                                       |
| 2021 | Malik Sallam                                                                          | COVID-19 Vaccine Hesitancy Worldwide: A Concise Systematic Review of Vaccine Acceptance Rates                 | Vaccines                               |                                                                                                                                                                                                                                                                                                                                                                                                                                                                                                                                                                                                                                                                                                                                                                                                                                                                                                                                                                                                                                                                                                                                                                                                                                                                                                                                                                                                                                                                                                                                                                                                                                                                                                                                                                              |
| 2021 | Martin Wiredu Agyekum, Grace Frempong Afrifa-Anane, Frank Kyei-Arthur and Bright Addo | Acceptability of COVID-19 vaccination among health care workers in Ghana                                      | Advances in Public Health              |                                                                                                                                                                                                                                                                                                                                                                                                                                                                                                                                                                                                                                                                                                                                                                                                                                                                                                                                                                                                                                                                                                                                                                                                                                                                                                                                                                                                                                                                                                                                                                                                                                                                                                                                                                              |



| Year | Author(s)                                                                                                                                                                                                                         | Title                                                                                                                                               | Journal                   | Abstract                                                                                                                                                                                                                                                                                                                                                                                                                                                                                                                                                                                                                                                                                                                                                                                                                                                                                                                                                                                                                                                                                                                                                                                                                                                                                                                                                                                                                                                                                                                                                                                                                                                                                                                                                                                                                                                                                                                                                                                                                                                                                                                                                                                                                                                                                                                                                                                                                                                                                                                                                                                                                                                                                                     |
|------|-----------------------------------------------------------------------------------------------------------------------------------------------------------------------------------------------------------------------------------|-----------------------------------------------------------------------------------------------------------------------------------------------------|---------------------------|--------------------------------------------------------------------------------------------------------------------------------------------------------------------------------------------------------------------------------------------------------------------------------------------------------------------------------------------------------------------------------------------------------------------------------------------------------------------------------------------------------------------------------------------------------------------------------------------------------------------------------------------------------------------------------------------------------------------------------------------------------------------------------------------------------------------------------------------------------------------------------------------------------------------------------------------------------------------------------------------------------------------------------------------------------------------------------------------------------------------------------------------------------------------------------------------------------------------------------------------------------------------------------------------------------------------------------------------------------------------------------------------------------------------------------------------------------------------------------------------------------------------------------------------------------------------------------------------------------------------------------------------------------------------------------------------------------------------------------------------------------------------------------------------------------------------------------------------------------------------------------------------------------------------------------------------------------------------------------------------------------------------------------------------------------------------------------------------------------------------------------------------------------------------------------------------------------------------------------------------------------------------------------------------------------------------------------------------------------------------------------------------------------------------------------------------------------------------------------------------------------------------------------------------------------------------------------------------------------------------------------------------------------------------------------------------------------------|
| 2022 | Melissa Leach, Hayley MacGregor, Grace Akello, Lawrence Babawo, Moses Baluku, Alice Desclaux, Catherine Grant, Foday Kamara, Marion Nyakoi, Melissa Parker, Paul Richards, Esther Mokuwa, Bob Okello, Kelley Sams and Khoudia Sow | Vaccine anxieties, vaccine preparedness: Perspectives from Africa in a Covid-19 era                                                                 | Social Science & Medicine | Global debates about vaccines as a key element of pandemic response and future preparedness in the era of Covid-19 currently focus on questions of supply, with attention to global injustice in vaccine distribution and African countries as rightful beneficiaries of international de-regulation and financing initiatives such as COVAX. At the same time, vaccine demand and uptake are seen to be threatened by hesitancy, often attributed to an increasingly globalised anti-vaxx movement and its propagation of misinformation and conspiracy, now reaching African populations through a social media 'infodemic'. Underplayed in these debates are the socio-political contexts through which vaccine technologies enter and are interpreted within African settings, and the crucial intersections between supply and demand. We explore these through a 'vaccine anxieties' framework attending to both desires for and worries about vaccines, as shaped by bodily, societal and wider political understandings and experiences. This provides an analytical lens to organise and interpret ethnographic and narrative accounts in local and national settings in Uganda and Sierra Leone, and their (dis)connections with global debates and geopolitics. In considering the socially-embedded reasons why people want or do not want Covid-19 vaccines, and how this intersects with the dynamics of vaccine supply, access and distribution in rapidly-unfolding epidemic situations, we bring new, expanded insights into debates about vaccine confidence and vaccine preparedness. (Copyright © 2022 The Authors. Published by Elsevier Ltd.. All rights reserved.)                                                                                                                                                                                                                                                                                                                                                                                                                                                                                                                                                                                                                                                                                                                                                                                                                                                                                                                                                                                                                    |
| 2022 | Metadel Adane, Ayechech Ademas and Helmut Kloos                                                                                                                                                                                   | Knowledge, attitudes, and perceptions of COVID-19 vaccine and refusal to receive COVID-19 vaccine among healthcare workers in northeastern Ethiopia | BMC Public Health         | <b>Background:</b> Major efforts are being made to control the spread and impacts of the coronavirus pandemic using vaccines. Ethiopia began on March 13, 2021, to vaccinate healthcare workers (HCWs) for COVID-19 with the AstraZeneca vaccine. However, willingness to be vaccinated depends to a large extent on factors beyond the availability of vaccines. This study aimed to determine the rate of intention to refuse COVID-19 vaccination and associated factors among HCWs in northeastern Ethiopia. <b>Method:</b> An institution-based cross-sectional study was employed among 404 HCWs in Dessie City, northeastern Ethiopia in May, 2021. Data were collected, checked, coded, entered into EpiData Version 4.6 and exported to Statistical Package of Social Sciences (SPSS) Version 25.0 for cleaning and analysis. The dependent variable was refuse to receive COVID-19 vaccination and the independent variables included socio-demographic factors, knowledge, attitudes and perceptions. A Binary logistic regression model was used to determine the association between vaccine refusal and the independent variables. From bivariate analysis, variables with p-values < 0.25 were retained for multivariable analysis. From multivariable analysis, variables with adjusted odds ratio (AOR), p-values < 0.05 at 95% confidence interval (CI) were declared as factors significantly associated with refusal to be vaccinated among HCWs in Dessie City, northeastern Ethiopia. <b>Results:</b> The proportion of HCWs with overall good knowledge, good perception, and positive attitudes about COVID-19 vaccination were 62.5%, 60.5%, and 52.3%, respectively; 64.0% of the HCWs wanted to be vaccinated while 36.0% said that they would refuse to do so. Multivariable analysis identified negative attitudes (AOR: 3.057; 95%CI [1.860 - 5.026]) and poor perceptions (AOR: 4.73; 95%CI [2.911 - 7.684]) about COVID-19 vaccines were significantly associated with refusal to be vaccinated for COVID-19. Nearly half (46.9%) of the HCWs stated that vaccines could worsen any pre-existing medical conditions and 39.5% of them thought that vaccines could cause COVID-19 infections. <b>Conclusion:</b> The willingness of HCWs to get vaccinated against COVID-19 was relatively high among HCWs. Negative attitudes and poor perceptions towards the anticipated COVID-19 vaccination were significant factors to refuse to be vaccinated. Our findings may provide information for the management authorities and stakeholders to promote and improve attitudes, knowledge and perceptions towards COVID-19 vaccination uptake among HCWs. [ABSTRACT FROM AUTHOR] |

| Year | Author(s)                                                                                                                                                                                                                                                                                                                                                                                     | Title                                                                                                                  | Journal                       | Abstract                                                                                                                                                                                                                                                                                                                                                                                                                                                                                                                                                                                                                                                                                                                                                                                                                                                                                                                                                                                                                                                                                                                                                                                                                                                                                                                                                                                                                                                                                                                                                                                                                                                                                        |
|------|-----------------------------------------------------------------------------------------------------------------------------------------------------------------------------------------------------------------------------------------------------------------------------------------------------------------------------------------------------------------------------------------------|------------------------------------------------------------------------------------------------------------------------|-------------------------------|-------------------------------------------------------------------------------------------------------------------------------------------------------------------------------------------------------------------------------------------------------------------------------------------------------------------------------------------------------------------------------------------------------------------------------------------------------------------------------------------------------------------------------------------------------------------------------------------------------------------------------------------------------------------------------------------------------------------------------------------------------------------------------------------------------------------------------------------------------------------------------------------------------------------------------------------------------------------------------------------------------------------------------------------------------------------------------------------------------------------------------------------------------------------------------------------------------------------------------------------------------------------------------------------------------------------------------------------------------------------------------------------------------------------------------------------------------------------------------------------------------------------------------------------------------------------------------------------------------------------------------------------------------------------------------------------------|
| 2021 | Mohammed A. M. Ahmed, Robert Colebunders, Abdi A. Gele, Abdiqani A. Farah, Shariff Osman, Ibraahim Abdullahi Guled, Aweis Ahmed Moalim Abdullahi, Ahmed Mohamud Hussein, Abdiaziz Mohamed Ali and Joseph Nelson Siewe Fodjo                                                                                                                                                                   | COVID-19 Vaccine Acceptability and Adherence to Preventive Measures in Somalia: Results of an Online Survey            | Vaccines                      |                                                                                                                                                                                                                                                                                                                                                                                                                                                                                                                                                                                                                                                                                                                                                                                                                                                                                                                                                                                                                                                                                                                                                                                                                                                                                                                                                                                                                                                                                                                                                                                                                                                                                                 |
| 2021 | Nasim Asadi Faezi, Pourya Gholizadeh, Moussa Sanogo, Amadou Oumarou, Maad Nasser Mohamed, Yacouba Cissoko, Mamadou Saliou Sow, Bakary Sayon Keita, Youssouf A. G. Mohamed Baye, Pasquale Pagliano, Patassi Akouda, Sid'Ahmed Soufiane, Akory Ag Iknane, Mamadou Oury Safiatou Diallo, Zakaria Gansane, Barkat Ali Khan, Şükran Köse, Hamid Allahverdi, Khudaverdi Ganvarov and Mariam Soumaré | Peoples' attitude toward COVID-19 vaccine, acceptance, and social trust among African and Middle East countries        | Health Promotion Perspectives | Background: To end the COVID-19 pandemic, a large part of the world must be immune to the virus by vaccination. Therefore, this study aimed to gauge intent to be vaccinated against COVID-19 among ordinary people and to identify attitudes towards vaccines and barriers for vaccine acceptance. Methods: The study population comprises 1880 people residing in different countries that answer a prepared questionnaire. The questionnaire topics are demographics, historical issues, participants' attitudes and beliefs regarding vaccines, concerns, and vaccine hesitancy. Results: Attitudes and beliefs relating to vaccines in general, and the COVID-19 vaccine, were ascertained. Overall, 66.81% of the contributors would like to be vaccinated against COVID-19, while 33.19% did not intend to be vaccinated. Reasons for COVID-19 vaccine hesitancy included concern regarding vaccine side effects, fear of getting sick from the uptake of the vaccine, and the absence of accurate vaccine promotion news. Individuals with higher education believe that India (68.6%) produces the best vaccine ( $P < 0.001$ ), while healthcare workers think the Chinese vaccine (44.2%) is the best ( $P = 0.020$ ). Individuals with higher education have not been vaccinated, not be healthcare workers, and females were the most contributors to effective of the vaccine in reducing mortality from COVID-19 disease. Conclusion: Given the degree of hesitancy against COVID-19 vaccination, a multifaceted approach to facilitate vaccine uptake that includes vaccine education, behavioral change strategies, and health promotion, is paramount. [ABSTRACT FROM AUTHOR] |
| 2021 | O. V. Adeniyi, D. Stead, M. Singata-Madliki, J. Batting, M. Wright, E. Jelliman, S. Abrahams and A. Parrish                                                                                                                                                                                                                                                                                   | Acceptance of covid-19 vaccine among the healthcare workers in the eastern cape, south africa: A cross sectional study | Vaccines                      | Background: This study assesses the perceptions and acceptance of severe acute respiratory syndrome coronavirus-2 (SARS-CoV-2) vaccination. It also examines its influencing factors among the healthcare workers (HCWs) in the Eastern Cape, South Africa. Methods: In this cross-sectional study performed in November and December 2020, a total of 1308 HCWs from two large academic hospitals participated in the Eastern Cape Healthcare Workers Acquisition of SARS-CoV-2 (ECHAS) study. Validated measures of vaccine hesitancy were explored using a questionnaire. Logistic regression was used to identify the determinants of vaccine hesitancy. Results: The majority were nurses (45.2%), and at risk for unfavourable Covid-19 outcome, due to obesity (62.9%) and having direct contact with individuals confirmed to have Covid-19 (77.1%). The overall acceptance of SARS-CoV-2 vaccine was 90.1%, which differed significantly by level of education. Individuals with lower educational attainment (primary and secondary education) and those with prior vaccine refusal were less likely to accept the SARS-CoV-2 vaccine. However, positive perceptions about the SARS-CoV-2 vaccine were independently associated with vaccine acceptance. Conclusions: The high level of acceptance of SARS-CoV-2 vaccine is reassuring; however, HCWs with a lower level of education and those with prior vaccine refusal should be targeted for further engagements to address their concerns and fears. © 2021 by the authors. Licensee MDPI, Basel, Switzerland.                                                                                                                  |

| Year | Author(s)                                                                                                                                                                                                                                                                                                                       | Title                                                                                                                          | Journal               | Abstract                                                                                                                                                                                                                                                                                                                                                                                                                                                                                                                                                                                                                                                                                                                                                                                                                                                                                                                                                                                                                                                                                                                                                                                                                                                                                                                                                                                                                                                                                                                                                                                                                                                                                                                                                                                                                                                                                                                                                                    |
|------|---------------------------------------------------------------------------------------------------------------------------------------------------------------------------------------------------------------------------------------------------------------------------------------------------------------------------------|--------------------------------------------------------------------------------------------------------------------------------|-----------------------|-----------------------------------------------------------------------------------------------------------------------------------------------------------------------------------------------------------------------------------------------------------------------------------------------------------------------------------------------------------------------------------------------------------------------------------------------------------------------------------------------------------------------------------------------------------------------------------------------------------------------------------------------------------------------------------------------------------------------------------------------------------------------------------------------------------------------------------------------------------------------------------------------------------------------------------------------------------------------------------------------------------------------------------------------------------------------------------------------------------------------------------------------------------------------------------------------------------------------------------------------------------------------------------------------------------------------------------------------------------------------------------------------------------------------------------------------------------------------------------------------------------------------------------------------------------------------------------------------------------------------------------------------------------------------------------------------------------------------------------------------------------------------------------------------------------------------------------------------------------------------------------------------------------------------------------------------------------------------------|
| 2021 | Obi Peter Adigwe                                                                                                                                                                                                                                                                                                                | COVID-19 vaccine hesitancy and willingness to pay: Emergent factors from a cross-sectional study in Nigeria                    | Vaccine: X            | Introduction: Prior to the COVID-19 pandemic, it took at least several years to develop vaccines for prevention of infectious diseases. The COVID-19 vaccine is the first to be developed within a period of one year. The expediency associated with the development of the COVID-19 vaccine has however been hampered by vaccine hesitancy and other relevant factors that could influence consequent immunisation. This study aimed at investigating factors associated with vaccine hesitancy and willingness to pay for COVID-19 vaccination.; Methods: A cross-sectional approach was used to undertake online and physical data collection with a validated questionnaire.; Results: A total of 1767 valid responses were received, female participants were in the minority (42.2%), majority (54.9%) of the study participants were between the ages of 18 and 30 years, and more than half (53.8%) of the participants were educated up to first degree level. Slightly above half (52.9%) of the study participants indicated that they were worried about side effects that may be associated with COVID-19 vaccines, and this may likely prevent them from taking the vaccine. A strong majority (85.1%) of the study participants indicated that COVID-19 vaccine should be administered at no cost to citizens. Only a quarter (26%) of the participants were willing to pay a fee for COVID-19 vaccination. Also, older participants and those that had been previously infected with COVID-19 were more likely to pay for COVID-19 vaccination.; Conclusion: This study provides critical insights which could influence immunisation efforts during the pandemic. An early understanding of population perceptions of the COVID-19 vaccine can be invaluable in designing successful campaigns. This is even more critical, given supply limitations, access issues and vaccines' inequity occasioned by the international scramble. (© 2021 The Author.) |
| 2021 | P. C. Addo, N. B. Kulbo, K. A. Sagoe, A. A. Ohemeng and E. Amuzu                                                                                                                                                                                                                                                                | Guarding against COVID-19 vaccine hesitance in Ghana: analytic view of personal health engagement and vaccine related attitude | Hum Vaccin Immunother | Vaccination is the most effective preventive measure against COVID-19 spread. While the WHO and other stakeholders fear vaccine nationalism, vaccine-hesitancy has become a topical issue among experts. Based on the evidence of vaccine hesitancy among Blacks, we explore the interrelatedness of psycho-social factors (personal health engagement, fear of COVID-19, perceived susceptibility, and vaccine-related attitude) likely to thwart vaccine acceptance in Africa. We sampled 1768 Ghanaian adults over 2 weeks from December 14, 2020, the first day a successful COVID-19 vaccine was administered in the US using an online survey. A higher level of personal health engagement was found to promote vaccine-related attitudes while reducing COVID-19 related fears, susceptibility, and vaccine hesitancy. Fear of COVID-19 and perceived vulnerability are significant contributors to the willingness to accept vaccination. This is an indication that health engagement alone will not promote vaccination willingness, but the fear and higher level of perceived susceptibility out of personal evaluation are essential factors in vaccination willingness. We recommend promoting health educational messages on COVID-19 vaccination ahead of any vaccination rollout in Africa, and such messages should contain some element of fear appeal.                                                                                                                                                                                                                                                                                                                                                                                                                                                                                                                                                                                                 |
| 2022 | Patrick D. M. C. Katoto, Saahier Parker, Nancy Coulson, Nirvana Pillay, Sara Cooper, Anelisa Jaca, Edison Mavundza, Gregory Houston, Candice Groenewald, Zaynab Essack, Jane Simmonds, Londiwe Deborah Shandu, Marilyn Couch, Nonkululeko Khuzwayo, Nobukhosi Ncube, Phelele Bhengu, Heidi van Rooyen and Charles Shey Wiysonge | Predictors of COVID-19 Vaccine Hesitancy in South African Local Communities: The VaxScenes Study                               | Vaccines              |                                                                                                                                                                                                                                                                                                                                                                                                                                                                                                                                                                                                                                                                                                                                                                                                                                                                                                                                                                                                                                                                                                                                                                                                                                                                                                                                                                                                                                                                                                                                                                                                                                                                                                                                                                                                                                                                                                                                                                             |

| Year | Author(s)                                                                                                                                                                                                  | Title                                                                                                          | Journal                    | Abstract                                                                                                                                                                                                                                                                                                                                                                                                                                                                                                                                                                                                                                                                                                                                                                                                                                                                                                                                                                                                                                                                                                                                                                                                                                                                                                                                                                                                                                                                                                                                                                                                                                                                                                                                                                                                                                                                                                                                                                                                                                                                                                                                                                                                                                                                                                                                                                                                                                                                                                                                                                                                         |
|------|------------------------------------------------------------------------------------------------------------------------------------------------------------------------------------------------------------|----------------------------------------------------------------------------------------------------------------|----------------------------|------------------------------------------------------------------------------------------------------------------------------------------------------------------------------------------------------------------------------------------------------------------------------------------------------------------------------------------------------------------------------------------------------------------------------------------------------------------------------------------------------------------------------------------------------------------------------------------------------------------------------------------------------------------------------------------------------------------------------------------------------------------------------------------------------------------------------------------------------------------------------------------------------------------------------------------------------------------------------------------------------------------------------------------------------------------------------------------------------------------------------------------------------------------------------------------------------------------------------------------------------------------------------------------------------------------------------------------------------------------------------------------------------------------------------------------------------------------------------------------------------------------------------------------------------------------------------------------------------------------------------------------------------------------------------------------------------------------------------------------------------------------------------------------------------------------------------------------------------------------------------------------------------------------------------------------------------------------------------------------------------------------------------------------------------------------------------------------------------------------------------------------------------------------------------------------------------------------------------------------------------------------------------------------------------------------------------------------------------------------------------------------------------------------------------------------------------------------------------------------------------------------------------------------------------------------------------------------------------------------|
| 2021 | Rihanna Mohammed, Teklehaimanot Mezgebe Nguse, Bruck Messele Habte, Atalay Mulu Fentie and Gebremedhin Beedemariam Gebretekle                                                                              | COVID-19 vaccine hesitancy among Ethiopian healthcare workers                                                  | PLoS ONE                   | <p>Introduction: COVID-19 poses significant health and economic threat prompting international firms to rapidly develop vaccines and secure quick regulatory approval. Although COVID-19 vaccination priority is given for high-risk individuals including healthcare workers (HCWs), the success of the immunization efforts hinges on peoples' willingness to embrace these vaccines. Objective: This study aimed to assess HCWs intention to be vaccinated against COVID-19 and the reasons underlying vaccine hesitancy. Methods: A cross-sectional survey was conducted among HCWs in Addis Ababa, Ethiopia from March to July 2021. Data were collected from eligible participants from 18 health facilities using a pre-tested semi-structured questionnaire. Data were summarized using descriptive statistics and multivariable logistic regression was performed to explore factors associated with COVID-19 vaccine hesitancy. A <math>p &lt; 0.05</math> was considered statistically significant. Results: A total of 614 HCWs participated in the study, with a mean age of <math>30.57 \pm 6.87</math> years. Nearly two-thirds (60.3%) of HCWs were hesitant to use the COVID-19 vaccine. Participants under the age of 30 years were approximately five times more likely to be hesitant to be vaccinated compared to those over the age of 40 years. HCWs other than medical doctors and/or nurses (AOR = 2.1; 95%CI; 1.1, 3.8) were more likely to be hesitant for COVID-19 vaccine. Lack of believe in COVID-19 vaccine benefits (AOR = 2.5; 95%CI; 1.3, 4.6), lack of trust in the government (AOR = 1.9; 95%CI; 1.3, 3.1), lack of trust science to produce safe and effective vaccines (AOR = 2.6; 95%CI; 1.6, 4.2); and concern about vaccine safety (AOR = 3.2; 95%CI; 1.9, 5.4) were also found to be predictors of COVID-19 vaccine hesitancy. Conclusion: COVID-19 vaccine hesitancy showed to be high among HCWs. All concerned bodies including the ministry, regional health authorities, health institutions, and HCWs themselves should work together to increase COVID-19 vaccine uptake and overcome the pandemic. [ABSTRACT FROM AUTHOR]</p>                                                                                                                                                                                                                                                                                                                                                                                                                                 |
| 2021 | Robert Kaba Alhassan, Matilda Aberese-Ako, Phidelia Theresa Doegah, Mustapha Immurana, Maxwel Ayindenaba Dalaba, Alfred Kwesi Manyeh, Desmond Klu, Evelyn Acquah, Evelyn Korkor Ansah and Margaret Gyapong | COVID-19 vaccine hesitancy among the adult population in Ghana: evidence from a pre-vaccination rollout survey | Tropical Medicine & Health | <p>Background: Coronavirus disease 2019 (COVID-19) has already claimed over four million lives globally and over 800 deaths in Ghana. The COVID-19 vaccine is a key intervention towards containing the pandemic. Over three billion doses of the vaccine have already been administered globally and over 800,000 doses administered in Ghana, representing less than 5% vaccination coverage. Fear, uncertainty, conspiracy theories and safety concerns remain important threats to, a successful rollout of the vaccine if not managed well. Objective: Ascertain the predictors of citizens' probability of participating in a COVID-19 vaccine trial and subsequently accept the vaccine when given the opportunity. Methodology: The study was an online nation-wide survey among community members (n = 1556) from 18th September to 23rd October, 2020 in the 16 regions in Ghana. Binary probit regression analysis with marginal effect estimations was employed to ascertain the predictors of community members' willingness to participate in a COVID-19 vaccine trial and uptake the vaccine. Results: Approximately 60% of respondents said they will not participate in a COVID-19 vaccine trial; 65% will take the vaccine, while 69% will recommend it to others. Willingness to voluntarily participate in COVID-19 vaccine trial, uptake the vaccine and advise others to do same was higher among adults aged 18–48 years, the unmarried and males (<math>p &lt; 0.05</math>). Significant predictors of unwillingness to participate in the COVID-19 vaccine trial and uptake of the vaccine are: married persons, females, Muslims, older persons, residents of less urbanised regions and persons with lower or no formal education (<math>p &lt; 0.05</math>). Predominant reasons cited for unwillingness to participate in a COVID-19 vaccine trial and take the vaccine included fear, safety concerns, lack of trust in state institutions, uncertainty, political connotations, spiritual and religious beliefs. Conclusion: The probability of accepting COVID-19 vaccine among the adult population in Ghana is high but the country should not get complacent because fear, safety and mistrust are important concerns that have the potential to entrench vaccine hesitancy. COVID-19 vaccine rollout campaigns should be targeted and cognisant of the key predictors of citizens' perceptions of the vaccine. These lessons when considered will promote Ghana's efforts towards vaccinating at least 20 million people to attain herd immunity. [ABSTRACT FROM AUTHOR]</p> |

| Year | Author(s)                                                                                                                          | Title                                                                                                                                          | Journal           | Abstract                                                                                                                                                                                                                                                                                                                                                                                                                                                                                                                                                                                                                                                                                                                                                                                                                                                                                                                                                                                                                                                                                                                                                                                                                                                                                                                                                                                                                                                                                                                                                                                                                                                                                                                                                                                                                                                                                                                                                                                                                                                                                                                                                                                                                                                                                                                                                                                                                         |
|------|------------------------------------------------------------------------------------------------------------------------------------|------------------------------------------------------------------------------------------------------------------------------------------------|-------------------|----------------------------------------------------------------------------------------------------------------------------------------------------------------------------------------------------------------------------------------------------------------------------------------------------------------------------------------------------------------------------------------------------------------------------------------------------------------------------------------------------------------------------------------------------------------------------------------------------------------------------------------------------------------------------------------------------------------------------------------------------------------------------------------------------------------------------------------------------------------------------------------------------------------------------------------------------------------------------------------------------------------------------------------------------------------------------------------------------------------------------------------------------------------------------------------------------------------------------------------------------------------------------------------------------------------------------------------------------------------------------------------------------------------------------------------------------------------------------------------------------------------------------------------------------------------------------------------------------------------------------------------------------------------------------------------------------------------------------------------------------------------------------------------------------------------------------------------------------------------------------------------------------------------------------------------------------------------------------------------------------------------------------------------------------------------------------------------------------------------------------------------------------------------------------------------------------------------------------------------------------------------------------------------------------------------------------------------------------------------------------------------------------------------------------------|
| 2022 | Ronelle Burger, Timothy Köhler, Aleksandra M. Golos, Alison M. Buttenheim, René English, Michele Tameris and Brendan Maughan-Brown | Longitudinal changes in COVID-19 vaccination intent among South African adults: evidence from the NIDS-CRAM panel survey, February to May 2021 | BMC Public Health | <p>Background: COVID-19 vaccine hesitancy has threatened the ability of many countries worldwide to contain the pandemic. Given the severe impact of the pandemic in South Africa and disruptions to the roll-out of the vaccine in early 2021, slower-than-expected uptake is a pressing public health challenge in the country. We examined longitudinal changes in COVID-19 vaccination intent among South African adults, as well as determinants of intent to receive a vaccine. Methods: We used longitudinal data from Wave 4 (February/March 2021) and Wave 5 (April/May 2021) of the National Income Dynamics Study: Coronavirus Rapid Mobile Survey (NIDS-CRAM), a national and broadly representative panel survey of adults in South Africa. We conducted cross-sectional analyses on aggregate and between-group variation in vaccination intent, examined individual-level changes between waves, and modeled demographic predictors of intent. Results: We analysed data for 5629 (Wave 4; 48% male, mean age 41.5 years) and 5862 (Wave 5; 48% male, mean age 41.6 years) respondents. Willingness to get a COVID-19 vaccine significantly increased from 70.8% (95% CI: 68.5–73.1) in Wave 4 to 76.1% (95% CI: 74.2–77.8) in Wave 5. Individual-level analyses indicated that only 6.6% of respondents remained strongly hesitant between survey waves. Although respondents aged 18–24 years were 8.5 percentage points more likely to report hesitancy, hesitant respondents in this group were 5.6 percentage points more likely to change their minds by Wave 5. Concerns about rushed testing and safety of the vaccines were frequent and strongly-held reasons for hesitancy. Conclusions: Willingness to receive a COVID-19 vaccine has increased among adults in South Africa, and those who were entrenched in their reluctance make up a small proportion of the country's population. Younger adults, those in formal housing, and those who trusted COVID-19 information on social media were more likely to be hesitant. Given that stated vaccination intent may not translate into behaviour, our finding that three-quarters of the population were willing to accept the vaccine may reflect an upper bound. Vaccination promotion campaigns should continue to frame vaccine acceptance as the norm and tailor strategies to different demographic groups.</p> <p>[ABSTRACT FROM AUTHOR]</p> |

1  
2  
3  
4  
5  
6  
7  
8  
9  
10  
11  
12  
13  
14  
15  
16  
17  
18  
19  
20  
21  
22  
23  
24  
25  
26  
27  
28  
29  
30  
31  
32  
33  
34  
35  
36  
37  
38  
39  
40  
41  
42  
43  
44  
45  
46

| Year | Author(s)                                                                                                                                                                                                       | Title                                                                                                         | Journal  | Abstract                                                                                                                                                                                                                                                                                                                                                                                                                                                                                                                                                                                                                                                                                                                                                                                                                                                                                                                                                                                                                                                                                                                                                                                                                                                                                                                                                                                                                                                                                                                                                                                                                                                                                                                                                                                                                                                                                                                                                                                                                                                                                                                                                                                                                                                                                                                                                                                                                                                                                                                                                                                                                                                                                             |
|------|-----------------------------------------------------------------------------------------------------------------------------------------------------------------------------------------------------------------|---------------------------------------------------------------------------------------------------------------|----------|------------------------------------------------------------------------------------------------------------------------------------------------------------------------------------------------------------------------------------------------------------------------------------------------------------------------------------------------------------------------------------------------------------------------------------------------------------------------------------------------------------------------------------------------------------------------------------------------------------------------------------------------------------------------------------------------------------------------------------------------------------------------------------------------------------------------------------------------------------------------------------------------------------------------------------------------------------------------------------------------------------------------------------------------------------------------------------------------------------------------------------------------------------------------------------------------------------------------------------------------------------------------------------------------------------------------------------------------------------------------------------------------------------------------------------------------------------------------------------------------------------------------------------------------------------------------------------------------------------------------------------------------------------------------------------------------------------------------------------------------------------------------------------------------------------------------------------------------------------------------------------------------------------------------------------------------------------------------------------------------------------------------------------------------------------------------------------------------------------------------------------------------------------------------------------------------------------------------------------------------------------------------------------------------------------------------------------------------------------------------------------------------------------------------------------------------------------------------------------------------------------------------------------------------------------------------------------------------------------------------------------------------------------------------------------------------------|
| 2021 | S. A. Bono, E. Faria de Moura Villela, C. S. Siau, W. S. Chen, S. Pengpid, M. T. Hasan, P. Sessou, J. D. Ditekemena, B. O. Amodan, M. C. Hosseinipour, H. Dolo, J. N. Siewe Fodjo, W. Y. Low and R. Colebunders | Factors Affecting COVID-19 Vaccine Acceptance: An International Survey among Low- and Middle-Income Countries | Vaccines | <p>All countries had lower odds for COVID-19 vaccine acceptability compared to Brazil at 90% effectiveness. However, at 95% effectiveness, Thailand (aOR: 1.54, 95% CI [1.14, 2.10], p = 0.006) and Bangladesh (aOR: 1.43, 95% CI [1.08, 1.90], p = 0.012) had higher odds for vaccine acceptability. Compared to participants aged 60 years and above, those in the age groups of 18–29 years and 30–39 years had higher odds of vaccine acceptance at both effectiveness levels, especially among 18- to 29-year-olds at the 95% effectiveness level (aOR: 1.62, 95% CI [1.14, 2.28], p = 0.007). Females had lower odds of willingness to be vaccinated at the 95% effectiveness level (aOR: 0.75, 95% CI [0.65, 0.88], p &lt; 0.001). In terms of income, those with lower-middle (aOR: 1.23, 95% CI [1.01, 1.49], p &lt; 0.001, higher-middle (aOR: 1.75, 95% CI [1.42, 2.16], p &lt; 0.001), and high income (aOR: 1.90, 95% CI [1.32, 2.73], p &lt; 0.001) had higher odds of willingness to be vaccinated compared to those with low income at the 90% effectiveness level.</p> <p>In terms of education and knowledge, participants from undergraduate and postgraduate levels had higher odds for willingness to be vaccinated compared to those who had completed primary and secondary education, particularly among undergraduate degree holders at the 95% effectiveness level (aOR: 1.50, 95% CI [1.19, 1.89], p = 0.001). Those who scored higher in COVID-19 knowledge had consistently higher odds of willingness to be vaccinated, particularly at the 95% effectiveness level (aOR: 2.13, 95% CI [1.96, 2.31], p &lt; 0.001).</p> <p>In terms of health status, participants who had tested negative for COVID-19 had higher odds of willingness to be vaccinated both at the 90% effectiveness level (aOR: 1.35, 95% CI [1.19, 1.53], p &lt; 0.001) and at the 95% effectiveness level (aOR: 1.37, 95% CI [1.15, 1.63], p &lt; 0.001). The presence of at least one underlying chronic disease predicted lower odds for willingness to be vaccinated (aOR: 0.81, 95% CI [0.71, 0.92], p = 0.001) at the 90% effectiveness level. Participants who gave a higher rating to the importance of taking the vaccine to protect themselves had higher odds of taking the vaccine at both levels of effectiveness, particularly at the 95% effectiveness level (aOR: 2.49, 95% CI [2.34, 2.66], p &lt; 0.001). Increased levels of fear/worry about being infected with COVID-19 consistently predicted higher odds of willingness to take the vaccine at 90% (aOR: 1.32, 95% CI [1.25, 1.38], p &lt; 0.001) and 95% effectiveness (aOR: 1.30, 95% CI [1.20, 1.40], p &lt; 0.001).</p> |
| 2021 | S. Handebo, M. Wolde, K. Shitu and A. Kassie                                                                                                                                                                    | Determinant of intention to receive COVID-19 vaccine among school teachers in Gondar City, Northwest Ethiopia | PLoS One | <p>BACKGROUND: Scientists across the world are working on innovating a successful vaccine that will save lives and end COVID-19 pandemic. World Health Organization (WHO) is working to make sure COVID-19 vaccines can be safely delivered to all those who need them. Indeed, the successful deployment and a sufficient uptake of vaccines is equally important. Acceptance and accessibility of such vaccine is a key indicator of vaccination coverage.</p> <p>OBJECTIVE: This study aimed to assess the determinants of intention to receive COVID-19 vaccine among school teachers in Gondar City. METHODS: An institution based cross-sectional study was conducted from December, 2020 to January, 2021. A total of 301 school teachers selected using stratified simple random sampling were included. Descriptive analysis such as medians, means, proportions, standard deviations and frequencies were computed. Linear regression analysis was done to identify factors associated with intention to receive COVID-19 vaccine. A p-value of less than 0.05 was used to declare statistical significance. RESULTS: The median intention to receive COVID-19 vaccine was 3.33 with interquartile range of 2.67-4.0. Of the participants 54.8% had scored above the median of intention to receive COVID-19 vaccine score. 54% variance in intention to receive COVID-19 vaccine was explained by the independent variables. Being affiliated with other category of religion, bachelor degree educational status, perceived susceptibility, perceived benefit, perceived barrier, and cues to action were significantly associated with the intention to receive COVID-19 vaccine. CONCLUSION: The median score of intention to receive COVID-19 vaccine was 3.33. Socio-demographic and health beliefs influenced the intention to receive the COVID-19 vaccine in the study participant. Policy makers and stakeholders should focus on strong health promotion about risks of the pandemic, benefit, safety, and efficacy of vaccination.</p>                                                                                                                                                                                                                                                                                                                                                                                                                                                                                                                                                                                                                                         |

| Year | Author(s)                                                                                                                          | Title                                                                                           | Journal  | Abstract                                                                                                                                                                                                                                                                                                                                                                                                                                                                                                                                                                                                                                                                                                                                                                                                                                                                                                                                                                                                                                                                                                                                                                                                                                                                                                                                             |
|------|------------------------------------------------------------------------------------------------------------------------------------|-------------------------------------------------------------------------------------------------|----------|------------------------------------------------------------------------------------------------------------------------------------------------------------------------------------------------------------------------------------------------------------------------------------------------------------------------------------------------------------------------------------------------------------------------------------------------------------------------------------------------------------------------------------------------------------------------------------------------------------------------------------------------------------------------------------------------------------------------------------------------------------------------------------------------------------------------------------------------------------------------------------------------------------------------------------------------------------------------------------------------------------------------------------------------------------------------------------------------------------------------------------------------------------------------------------------------------------------------------------------------------------------------------------------------------------------------------------------------------|
| 2021 | Shelton Kanyanda, Yannick Markhof, Philip Wollburg and Alberto Zezza                                                               | Acceptance of COVID-19 vaccines in sub-Saharan Africa: evidence from six national phone surveys | BMJ open |                                                                                                                                                                                                                                                                                                                                                                                                                                                                                                                                                                                                                                                                                                                                                                                                                                                                                                                                                                                                                                                                                                                                                                                                                                                                                                                                                      |
| 2021 | Sohail Agha, Adaobi Chine, Mathias Lalika, Samikshya Pandey, Aparna Seth, Alison Wiyeh, Alyssa Seng, Nandan Rao and Akhtar Badshah | Drivers of COVID-19 Vaccine Uptake amongst Healthcare Workers (HCWs) in Nigeria                 | Vaccines | This study applied a behavioral lens to understand drivers of COVID-19 vaccination uptake among healthcare workers (HCWs) in Nigeria. The study used data from an online survey of Nigerian HCWs ages 18 and older conducted in July 2021. Multivariate logistic regression analyses were conducted to examine predictors of getting two doses of a COVID-19 vaccine. One-third of HCWs in our sample reported that they had gotten two doses of a COVID-19 vaccine. Motivation and ability were powerful predictors of being fully vaccinated: HCWs with high motivation and high ability had a 15-times higher odds ratio of being fully vaccinated. However, only 27% of HCWs had high motivation and high ability. This was primarily because the ability to get vaccinated was quite low among HCWs: Only 32% of HCWs reported that it was very easy to get a COVID-19 vaccination. By comparison, motivation was relatively high: 69% of HCWs reported that a COVID-19 vaccine was very important for their health. Much of the recent literature coming out of Nigeria and other LMICs focuses on increasing motivation to get a COVID-19 vaccination. Our findings highlight the urgency of making it easier for HCWs to get COVID-19 vaccinations.                                                                                          |
| 2021 | Stacey Orangi, Jessie Pinchoff, Daniel Mwanga, Timothy Abuya, Mainga Hamaluba, George Warimwe, Karen Austrian and Edwine Barasa    | Assessing the Level and Determinants of COVID-19 Vaccine Confidence in Kenya                    | Vaccines | The government of Kenya has launched a phased rollout of COVID-19 vaccination. A major barrier is vaccine hesitancy; the refusal or delay of accepting vaccination. This study evaluated the level and determinants of vaccine hesitancy in Kenya. We conducted a cross-sectional study administered through a phone-based survey in February 2021 in four counties of Kenya. Multilevel logistic regression was used to identify individual perceived risks and influences, context-specific factors and vaccine-specific issues associated with COVID-19 vaccine hesitancy. COVID-19 vaccine hesitancy in Kenya was high: 36.5%. Factors associated with vaccine hesitancy included: Rural regions, perceived difficulty in adhering to government regulations on COVID-19 prevention, no perceived COVID-19 infection risk, concerns regarding vaccine safety and effectiveness, and religious and cultural reasons. There is a need for the prioritization of interventions to address vaccine hesitancy and improve vaccine confidence as part of the vaccine roll-out plan. These messaging and/or interventions should be holistic to include the value of other public health measures, be focused and targeted to specific groups, raise awareness on the risks of COVID-19 and effectively communicate the benefits and risks of vaccines. |



1  
2  
3  
4  
5  
6  
7  
8  
9  
10  
11  
12  
13  
14  
15  
16  
17  
18  
19  
20  
21  
22  
23  
24  
25  
26  
27  
28  
29  
30  
31  
32  
33  
34  
35  
36  
37  
38  
39  
40  
41  
42  
43  
44  
45  
46

For peer review only

| Year | Author(s)                                                                                                      | Title                                                                                                                                         | Journal          | Abstract                                                                                                                                                                                                                                                                                                                                                                                                                                                                                                                                                                                                                                                                                                                                                                                                                                                                                                                                                                                                                                                                                                                                                                                                                                                                                                                                                                                                                                                                                                                                                                                                                                                                                                                                                                                                                                                                                                                                                                                                                                                                                                                                                                                                                                                       |
|------|----------------------------------------------------------------------------------------------------------------|-----------------------------------------------------------------------------------------------------------------------------------------------|------------------|----------------------------------------------------------------------------------------------------------------------------------------------------------------------------------------------------------------------------------------------------------------------------------------------------------------------------------------------------------------------------------------------------------------------------------------------------------------------------------------------------------------------------------------------------------------------------------------------------------------------------------------------------------------------------------------------------------------------------------------------------------------------------------------------------------------------------------------------------------------------------------------------------------------------------------------------------------------------------------------------------------------------------------------------------------------------------------------------------------------------------------------------------------------------------------------------------------------------------------------------------------------------------------------------------------------------------------------------------------------------------------------------------------------------------------------------------------------------------------------------------------------------------------------------------------------------------------------------------------------------------------------------------------------------------------------------------------------------------------------------------------------------------------------------------------------------------------------------------------------------------------------------------------------------------------------------------------------------------------------------------------------------------------------------------------------------------------------------------------------------------------------------------------------------------------------------------------------------------------------------------------------|
| 2022 | T. P. Davis, Jr., A. K. Yimam, M. A. Kalam, A. D. Tolossa, R. Kanwagi, S. Bauler, L. Kulathungam and H. Larson | Behavioural Determinants of COVID-19-Vaccine Acceptance in Rural Areas of Six Lower- and Middle-Income Countries                              | Vaccines (Basel) | Delayed acceptance or refusal of COVID-19 vaccines may increase and prolong the threat to global public health and the economy. Identifying behavioural determinants is considered a critical step in explaining and addressing the barriers of vaccine refusal. This study aimed to identify the behavioural determinants of COVID-19-vaccine acceptance and provide recommendations to design actionable interventions to increase uptake of the COVID-19 vaccine in six lower- and middle-income countries. Taking into consideration the health belief model and the theory of reasoned action, a barrier analysis approach was employed to examine twelve potential behavioural determinants of vaccine acceptance in Bangladesh, India, Myanmar, Kenya, the Democratic Republic of the Congo (DRC), and Tanzania. In all six countries, at least 45 interviews with those who intended to get the vaccine ("Acceptors") and another 45 or more interviews with those who did not ("Non-acceptors") were conducted, totalling 542 interviews. Data analysis was performed to find statistically significant ( $p < 0.05$ ) differences between Acceptors and Non-acceptors of COVID-19 vaccines and to identify which beliefs were most highly associated with acceptance and non-acceptance of vaccination based on the estimated relative risk. The analysis showed that perceived social norms, perceived positive and negative consequences, perceived risk, perceived severity, trust, perceived safety, and expected access to COVID-19 vaccines had the highest associations with COVID-19-vaccine acceptance in Bangladesh, Kenya, Tanzania, and the DRC. Additional behavioural determinants found to be significant in Myanmar and India were perceived self-efficacy, trust in COVID-19 information provided by leaders, perceived divine will, and perceived action efficacy of the COVID-19 vaccines. Many of the determinants were found to be significant, and their level of significance varied from country to country. National and local plans should include messages and activities that address the behavioural determinants found in this study to significantly increase the uptake of COVID-19 vaccines across these countries. |
| 2021 | Theophilus Acheampong, Eli A. Akorsikumah, John Osae-Kwapong, Musah Khalid, Alfred Appiah and John H. Amuasi   | Examining Vaccine Hesitancy in Sub-Saharan Africa: A Survey of the Knowledge and Attitudes among Adults to Receive COVID-19 Vaccines in Ghana | Vaccines         | The impact of COVID-19 vaccination programmes on disease transmission, morbidity and mortality relies heavily on the population's willingness to accept the vaccine. We explore Ghanaian adult citizens' vaccine hesitancy attitudes and identify the likelihood of participation or non-participation in the government's effort to get citizens vaccinated. A fully anonymised cross-sectional online survey of 2345 adult Ghanaians was conducted from 23 to 28 February 2021. Differences in intentions regarding COVID-19 vaccination were explored using Pearson Chi-square tests. Additionally, multinomial logistic regression was used to analyse the factors associated with willingness to receive vaccines. Responses were weighted using the iterative proportional fitting technique to generate a representative sample. About half (51%) of mostly urban adult Ghanaians over 15 years are likely to take the COVID-19 vaccine if made generally available. Almost a fifth (21%) of the respondents were unlikely to take the vaccine, while another 28% were undecided. Additionally, we find differences in vaccine hesitancy among some socio-demographic characteristics such as age, gender, and primary sources of information. Attaining the proverbial 63% to 70% herd immunity threshold in Ghana is only possible if the preventive vaccination programmes are combined with an enhanced and coordinated public education campaign. Such a campaign should focus on promoting the individual and population-level benefits of vaccination and pre-emptive efforts towards addressing misinformation about vaccines.                                                                                                                                                                                                                                                                                                                                                                                                                                                                                                                                                                                                                  |



| Year | Author(s)                                                         | Title                                                                                                                                           | Journal       | Abstract                                                                                                                                                                                                                                                                                                                                                                                                                                                                                                                                                                                                                                                                                                                                                                                                                                                                                                                                                                                                                                                                                                                                                                                                                                                                                                                                                                                                                                                                                                                                                                                                                                                                                                                                                                                                                                                                                                     |
|------|-------------------------------------------------------------------|-------------------------------------------------------------------------------------------------------------------------------------------------|---------------|--------------------------------------------------------------------------------------------------------------------------------------------------------------------------------------------------------------------------------------------------------------------------------------------------------------------------------------------------------------------------------------------------------------------------------------------------------------------------------------------------------------------------------------------------------------------------------------------------------------------------------------------------------------------------------------------------------------------------------------------------------------------------------------------------------------------------------------------------------------------------------------------------------------------------------------------------------------------------------------------------------------------------------------------------------------------------------------------------------------------------------------------------------------------------------------------------------------------------------------------------------------------------------------------------------------------------------------------------------------------------------------------------------------------------------------------------------------------------------------------------------------------------------------------------------------------------------------------------------------------------------------------------------------------------------------------------------------------------------------------------------------------------------------------------------------------------------------------------------------------------------------------------------------|
| 2021 | U. G. Okafor, A. Isah, J. C. Onuh, C. B. Mgbemena and C. M. Ubaka | Community acceptance and willingness to pay for hypothetical COVID-19 vaccines in a developing country: a web-based nationwide study in Nigeria | Pan Afr Med J | <p>INTRODUCTION: some promising COVID-19 vaccines are soon to be available but getting the African community to accept them may be challenging. This study assessed the acceptability and willingness to pay (WTP) for hypothetical COVID-19 vaccines among Nigerians. METHODS: a cross-sectional, web-based study was conducted among the Nigerian populace. A 20-item questionnaire was used to collect responses through Google form which was shared to consenting participants through two social media platforms. Multivariate logistic regression was used to determine the sociodemographic factors that were predictive of respondents' willingness to accept the COVID-19 vaccines. Statistical significance was set at <math>p &lt; 0.05</math>. RESULTS: six hundred and eighty-nine respondents completed the survey, with 50.5% being females. Exactly 43.3% of respondents reported that they would accept a hypothetical vaccine if it is currently available, 62.1% said they would accept it in the future while 71.1% agreed to accept it if recommended by healthcare providers. A third (31.9%) of respondents accepted the vaccine for their self-protection and half of those not accepting it (51.3%) said they did not want to "be used as an experiment". Respondents who were of oldest ages (aOR=0.330, 95% CI: 0.141-0.767, <math>p=0.010</math>), of Christian religion (aOR=3.251, 95% CI: 1.301-8.093, <math>p=0.011</math>), and aware of a possible vaccine being made available (aOR=0.636, 95% CI: 0.440-0.920) were significantly more unwilling to accept the vaccine. The median range of WTP was US\$1.2-2.5. CONCLUSION: there is a low acceptance in Nigeria for a COVID-19 vaccine if it was available now, but much higher if it is recommended by a healthcare provider. A high proportion of willing respondents indicated a positive WTP for the vaccine.</p> |

| Year | Author(s)                                                                                                                                                                                   | Title                                                      | Journal | Abstract                                                                                                                                                                                                                                                                                                                                                                                                                                                                                                                                                                                                                                                                                                                                                                                                                                                                                                                                                                                                                                                                                                                                                                                                                                                                                                                                                                                                                                                                                                                                                                                                                                                                                                                                                                                                                                                                                                                                                                                                                                                                                                                                                                                                                                                                                                                                                                                                                                                                                                                                                                                                                                                                                                                                                                                                                                                                                                                                                                                                                                                                                                                                                                                                         |
|------|---------------------------------------------------------------------------------------------------------------------------------------------------------------------------------------------|------------------------------------------------------------|---------|------------------------------------------------------------------------------------------------------------------------------------------------------------------------------------------------------------------------------------------------------------------------------------------------------------------------------------------------------------------------------------------------------------------------------------------------------------------------------------------------------------------------------------------------------------------------------------------------------------------------------------------------------------------------------------------------------------------------------------------------------------------------------------------------------------------------------------------------------------------------------------------------------------------------------------------------------------------------------------------------------------------------------------------------------------------------------------------------------------------------------------------------------------------------------------------------------------------------------------------------------------------------------------------------------------------------------------------------------------------------------------------------------------------------------------------------------------------------------------------------------------------------------------------------------------------------------------------------------------------------------------------------------------------------------------------------------------------------------------------------------------------------------------------------------------------------------------------------------------------------------------------------------------------------------------------------------------------------------------------------------------------------------------------------------------------------------------------------------------------------------------------------------------------------------------------------------------------------------------------------------------------------------------------------------------------------------------------------------------------------------------------------------------------------------------------------------------------------------------------------------------------------------------------------------------------------------------------------------------------------------------------------------------------------------------------------------------------------------------------------------------------------------------------------------------------------------------------------------------------------------------------------------------------------------------------------------------------------------------------------------------------------------------------------------------------------------------------------------------------------------------------------------------------------------------------------------------------|
| 2021 | Ugochukwu A. Eze, Kingsley I. Ndoh, Babalola A. Ibisola, Chinemerem D. Onwuliri, Adenekan Osiyemi, Nnamdi Ude, Amalachukwu A. Chime, Eric O. Ogbor, Adegboyega O. Alao and Ashiru Abdullahi | Determinants for Acceptance of COVID-19 Vaccine in Nigeria | Cureus  | <p>Background: The coronavirus disease 2019 (COVID-19) pandemic heralded an unprecedented race to the development of several vaccine candidates at record speeds never seen in global health. Within nine months, Pfizer-BioNTech's COVID-19 vaccine was approved by the United States FDA. Unfortunately, while these advances were ongoing, there was a burgeoning epidemic of disinformation about the virus and the vaccines that affected the willingness of people, especially minority groups, to get vaccinated. In Nigeria, this wave of vaccine hesitancy was happening against the backdrop of landmark pharmaceutical litigations such as the 2007 Pfizer trovafloxacin lawsuit in the country.; Aim: To assess the determinants of the COVID-19 vaccine's acceptability among Nigerians.; Materials and Methods: Following ethical approval, a population-based cross-sectional study was conducted from November 2020 to January 2021 using an adapted pretested, self-administered questionnaire originally designed by Aryn Malik and colleagues who conducted a similar study at Yale University School of Public Health. The participants were recruited through simple random sampling using a list of community and corporate sites obtained from Google Maps in the three regional zones of Nigeria (north, east, and west) in diverse occupational and residential settings. Information obtained includes socio-demographics, medical history related to COVID-19, level of knowledge, risk perception, and attitudes toward COVID-19 and the vaccines. Descriptive and inferential statistics were done, and results were summarized into percentages and associations. The level of statistical significance was set at a p-value of &lt;0.05. Using the open EpiR package (Emory), we determined a minimum of 340 participants for a statistical power of 80%.; Results: A total of 358 responses were obtained out of the 120 questionnaires distributed in each of the three regions, of which 189 (53%) were females. The mean age of respondents was 32 years (<math>\pm 11.2</math> SD). About 75% of the participants had at least a college education. The majority (66.2%) of the participants were willing to accept the approved vaccine. The mean risk perception score for COVID-19 was 5.1 (<math>\pm 2.2</math> SD) out of 10, while the mean COVID-19 symptom knowledge score was 8.6 (<math>\pm 4.1</math> SD) out of 19. Variables such as being male, identifying as Christian, Hausa ethnicity, and living in northern Nigeria had a statistically significant relationship with the willingness to get vaccinated.; Conclusion: Over 60% of Nigerians are willing to take the COVID-19 vaccines if recommended by health workers. We found male gender, religion, ethnicity, and geographical location to positively influence the willingness of Nigerians to get vaccinated against COVID-19. Health workers should be supported to go beyond the confines of the hospital to educate the general public in schools, marketplaces, churches, and corporate organizations on the efficacy and safety of the approved vaccines. (Copyright © 2021, Eze et al.)</p> |

| Year | Author(s)                                                                                                                                                     | Title                                                                                                                                                                                            | Journal                                 | Abstract                                                                                                                                                                                                                                                                                                                                                                                                                                                                                                                                                                                                                                                                                                                                                                                                                                                                                                                                                                                                                                                                                                                                                                                                                                                                                                                                                                                                                                                                                                                                                                                                                                                                                                                                                                                                                                                                                                                                                                                                                                                                                                            |
|------|---------------------------------------------------------------------------------------------------------------------------------------------------------------|--------------------------------------------------------------------------------------------------------------------------------------------------------------------------------------------------|-----------------------------------------|---------------------------------------------------------------------------------------------------------------------------------------------------------------------------------------------------------------------------------------------------------------------------------------------------------------------------------------------------------------------------------------------------------------------------------------------------------------------------------------------------------------------------------------------------------------------------------------------------------------------------------------------------------------------------------------------------------------------------------------------------------------------------------------------------------------------------------------------------------------------------------------------------------------------------------------------------------------------------------------------------------------------------------------------------------------------------------------------------------------------------------------------------------------------------------------------------------------------------------------------------------------------------------------------------------------------------------------------------------------------------------------------------------------------------------------------------------------------------------------------------------------------------------------------------------------------------------------------------------------------------------------------------------------------------------------------------------------------------------------------------------------------------------------------------------------------------------------------------------------------------------------------------------------------------------------------------------------------------------------------------------------------------------------------------------------------------------------------------------------------|
| 2021 | Umakrishnan Kollamparambil, Adeola Oyenubi and Chijioke Nwosu                                                                                                 | COVID19 vaccine intentions in South Africa: health communication strategy to address vaccine hesitancy                                                                                           | BMC Public Health                       | <p><b>Background:</b> Vaccine hesitancy is emerging as a significant challenge in many parts of the world in the fight against the COVID19 pandemic. The continued infection amongst the unvaccinated can lead to a heightened risk of further virus mutation, exposing even those vaccinated to new virus strains. Therefore, there are social benefits in minimising vaccine hesitancy. The objective of this study is to assess the level of COVID19 vaccine hesitancy in South Africa, identify the socio-economic patterns in vaccine hesitancy and highlight insights from the national survey that can inform the development of a COVID-19 vaccination acceptance communication campaign.</p> <p><b>Methods:</b> The study uses the nationally representative National Income Dynamics Study - Coronavirus Rapid Mobile Survey (NIDS-CRAM) survey. The analysis combines univariate and bivariate statistics, as well as multivariate regression models like binomial/ordinal and multinomial logit.</p> <p><b>Results:</b> The study finds that vaccine acceptance is lower than that of non-pharmaceutical intervention like face-mask use. Only 55% fully accept the vaccine, while a further 16% are moderately accepting of vaccines. Together, vaccine acceptance is estimated at 70.8%, and vaccine hesitancy against COVID19 is estimated at 29.2% amongst the adult South African population. The study has identified the perceived risk of infection with the mediating role of efficacy as a key predictor of vaccine intention. Higher awareness of COVID19 related information and higher household income are correlated with lower vaccine hesitancy. The non-black African population group has significantly high vaccine hesitancy compared to black Africans.</p> <p><b>Conclusions:</b> There are other significant differences across socio-economic and demographic variables in vaccine hesitancy. From a communication perspective, it is imperative to continue risk messaging, hand in hand with clearer information on the efficacy of the vaccines. [ABSTRACT FROM AUTHOR]</p> |
| 2021 | Yewlsey Fentie Alle and Keder Essa Oumer                                                                                                                      | Attitude and associated factors of COVID-19 vaccine acceptance among health professionals in Debre Tabor Comprehensive Specialized Hospital, North Central Ethiopia; 2021: cross-sectional study | Virusdisease                            |                                                                                                                                                                                                                                                                                                                                                                                                                                                                                                                                                                                                                                                                                                                                                                                                                                                                                                                                                                                                                                                                                                                                                                                                                                                                                                                                                                                                                                                                                                                                                                                                                                                                                                                                                                                                                                                                                                                                                                                                                                                                                                                     |
| 2021 | Yitayeh Belsti, Yibeltal Yismaw Gela, Yonas Akalu, Baye Dagneu, Mihret Getnet, Mohammed Abdu Seid, Mengistie Diress, Yigizie Yeshaw and Sofonias Addis Fekadu | Willingness of Ethiopian population to receive COVID-19 vaccine                                                                                                                                  | Journal of Multidisciplinary Healthcare |                                                                                                                                                                                                                                                                                                                                                                                                                                                                                                                                                                                                                                                                                                                                                                                                                                                                                                                                                                                                                                                                                                                                                                                                                                                                                                                                                                                                                                                                                                                                                                                                                                                                                                                                                                                                                                                                                                                                                                                                                                                                                                                     |

| Year | Author(s)                                                                                                                         | Title                                                                                                                                     | Journal                     | Abstract                                                                                                                                                                                                                                                                                                                                                                                                                                                                                                                                                                                                                                                                                                                                                                                                                                                                                                                                                                                                                                                                                                                                                                                                                                                                                                                                                                                                                                                                                                                                                                                                                                                                                                                                                                                                                                                                                                                                                                                                                                             |
|------|-----------------------------------------------------------------------------------------------------------------------------------|-------------------------------------------------------------------------------------------------------------------------------------------|-----------------------------|------------------------------------------------------------------------------------------------------------------------------------------------------------------------------------------------------------------------------------------------------------------------------------------------------------------------------------------------------------------------------------------------------------------------------------------------------------------------------------------------------------------------------------------------------------------------------------------------------------------------------------------------------------------------------------------------------------------------------------------------------------------------------------------------------------------------------------------------------------------------------------------------------------------------------------------------------------------------------------------------------------------------------------------------------------------------------------------------------------------------------------------------------------------------------------------------------------------------------------------------------------------------------------------------------------------------------------------------------------------------------------------------------------------------------------------------------------------------------------------------------------------------------------------------------------------------------------------------------------------------------------------------------------------------------------------------------------------------------------------------------------------------------------------------------------------------------------------------------------------------------------------------------------------------------------------------------------------------------------------------------------------------------------------------------|
| 2021 | Yusuff Adebayo Adebisi, Aishat Jumoke Alaran, Obasanjo Afolabi Bolarinwa, Wuraola Akande Sholabi and Don Eliseo Lucero-Prisno Iii | When it is available, will we take it? Social media users' perception of hypothetical COVID-19 vaccine in Nigeria                         | Pan African Medical Journal | Introduction: COVID-19 pandemic is a global public health threat facing mankind. There is no specific antiviral treatment for COVID-19, and many vaccine candidates are currently under clinical trials. This study aimed to understand the perception of social media users regarding a hypothetical COVID-19 vaccine in Nigeria. Methods: we conducted a cross-sectional survey among social media users in Nigeria in August 2020 using an online questionnaire. The questionnaire includes sections on the demographic characteristics of the respondents and their perception regarding a hypothetical COVID-19 vaccine. A total of 517 respondents completed and returned the informed consent along with the questionnaire electronically. Data were coded and abstracted into Microsoft Excel spreadsheet and loaded into the STATA 14 software for final analysis. Results: the results showed that more than half of the respondents were male 294 (56.9%). Most of the respondents 385 (74.5%) intend to take the COVID-19 vaccine when it becomes available. Among the 132 respondents that would not take the COVID-19 vaccine, the major reason for non-acceptance was unreliability of the clinical trials 49 (37.1%), followed by the belief that their immune system is sufficient to combat the virus 36 (27.3%). We found a significant association between the age of the respondents and the COVID-19 vaccine acceptance (P-value=0.00) as well as geographical location and COVID-19 vaccine acceptance (P-value=0.02). Conclusion: it was observed that most of the respondents were willing to take the COVID-19 vaccine. Our findings also reiterate the need to reassure the public the benefits an effective and safe COVID-19 vaccine can reap for public health. There is a need for national health authorities in Nigeria to ensure public trust is earned and all communities, including the marginalized populations, are properly engaged to ensure an optimal COVID-19 vaccine acceptance. [ABSTRACT FROM AUTHOR] |
| 2021 | Z. Iliyasu, A. A. Umar, H. M. Abdullahi, A. A. Kwaku, T. G. Amole, F. I. Tsiga-Ahmed, R. M. Garba, H. M. Salihu and M. H. Aliyu   | They have produced a vaccine, but we doubt if COVID-19 exists: correlates of COVID-19 vaccine acceptability among adults in Kano, Nigeria | Hum Vaccin Immunother       | Vaccination is a critical tool in the global response to the COVID-19 pandemic. Yet, COVID-19 vaccine hesitancy has not been well explored in parts of Nigeria. We assessed the predictors of acceptability of the COVID-19 vaccine and identified reasons for vaccine hesitancy among adults in urban Kano, northern Nigeria. Using a mixed-methods design, we administered structured questionnaires to a cross-section of adults (n = 446), complemented with 20 in-depth interviews. Binary logistic regression and the framework approach were used to analyze the data. About one-half (51.1%, n = 228) of the respondents were willing to take the COVID-19 vaccine. Vaccine acceptance was higher among older respondents ( $\geq 30$ years) (adjusted Odds Ratio (aOR) = 1.76, 95% Confidence Interval (CI): 1.14-2.99 ( $\geq 30$ vs. $< 30$ ), higher-income earners ( $\geq 30,000$ Naira) (aOR = 2.06, 95%CI:1.12-3.80, $\geq 30,000$ vs. $< 30,000$ ), and those with a history of a chronic medical disorder (aOR = 1.90, 95%CI:1.06-3.72). Vaccine acceptance was also higher in persons with high risk perception (aOR = 1.61, 95%CI:1.13-2.81, high vs. low), those who were unconcerned about vaccine safety (aOR = 1.71, 95%CI:1.13-3.55), and those who were not worried about efficacy (aOR = 2.02, 95%CI:1.14-4.11) and infertility-related rumors (aOR = 1.98, 95%CI:1.24-3.18). Themes revealed doubts about the existence of COVID-19, mistrust for authorities, and popular credence to rumors and conspiracy theories. In conclusion, COVID-19 vaccine acceptance was sub-optimal and influenced by respondent's age, income, co-morbidities, risk perception, and concerns about vaccine safety, efficacy, and rumors. Context-specific, evidence-based risk communication strategies and trust-building measures could boost vaccine confidence in similar settings.                                                                                                                                                   |

| Year | Author(s)                                                                                                                                                        | Title                                                                                                                                                                                      | Journal                     | Abstract                                                                                                                                                                                                                                                                                                                                                                                                                                                                                                                                                                                                                                                                                                                                                                                                                                                                                                                                                                                                                                                                                                                                                                                                                                                                                                                                                                                                                                                                                                                                                                                                                                                                                                                                           |
|------|------------------------------------------------------------------------------------------------------------------------------------------------------------------|--------------------------------------------------------------------------------------------------------------------------------------------------------------------------------------------|-----------------------------|----------------------------------------------------------------------------------------------------------------------------------------------------------------------------------------------------------------------------------------------------------------------------------------------------------------------------------------------------------------------------------------------------------------------------------------------------------------------------------------------------------------------------------------------------------------------------------------------------------------------------------------------------------------------------------------------------------------------------------------------------------------------------------------------------------------------------------------------------------------------------------------------------------------------------------------------------------------------------------------------------------------------------------------------------------------------------------------------------------------------------------------------------------------------------------------------------------------------------------------------------------------------------------------------------------------------------------------------------------------------------------------------------------------------------------------------------------------------------------------------------------------------------------------------------------------------------------------------------------------------------------------------------------------------------------------------------------------------------------------------------|
| 2021 | Zubairu Iliyasu, Muhammad R. Garba, Auwalu U. Gajida, Taiwo G. Amole, Amina A. Umar, Hadiza M. Abdullahi, Aminatu A. Kwaku, Hamisu M. Salihu and Muktar H. Aliyu | 'Why Should I Take the COVID-19 Vaccine after Recovering from the Disease?' A Mixed-methods Study of Correlates of COVID-19 Vaccine Acceptability among Health Workers in Northern Nigeria | Pathogens and global health | We assessed the acceptability of COVID-19 vaccine, predictors, and reasons for vaccine hesitancy among clinical and non-clinical staff at a tertiary hospital in Kano, northern Nigeria. Using a mixed-methods design, structured questionnaires were administered to 284 hospital staff, followed by 20 in-depth interviews with a purposive sub-sample. Logistic regression and the framework approach were used to analyze the data. Only 24.3% (n = 69) of the respondents were willing to accept the COVID-19 vaccine. Acceptance was lower among females (Adjusted Odds Ratio (aOR) = 0.37, 95% Confidence Interval (95%CI): 0.18-0.77 (male vs. female), nurses/midwives (aOR = 0.41, 95%CI: 0.13-0.60, physicians vs. nurses/midwives), persons not tested for COVID-19 (aOR = 0.32, 95%CI 0.13-0.79) (no vs. yes) and those who perceived themselves to be at low risk of COVID-19 (aOR = 0.47, 95%CI: 0.21-0.89, low vs. high). In contrast, vaccine acceptance was higher among more experienced workers (aOR = 2.28, 95%CI: 1.16-8.55, ≥10 vs. <5 years). Vaccine acceptance was also higher among persons who did not worry about vaccine efficacy (aOR = 2.35, 95%CI: 1.18-6.54, no vs. yes), or about vaccine safety (aOR = 1.76, 95%CI: 1.16-5.09, no vs. yes), side effects (aOR = 1.85, 95%CI: 1.17-5.04, no vs. yes), or rumors (aOR = 2.55, 95%CI: 1.25-5.20, no vs. yes). The top four reasons for vaccine hesitancy included distrust, inadequate information, fear of long-term effects, and infertility-related rumors. Concerted efforts are required to build COVID-19 vaccine confidence among health workers in Kano, Nigeria. Our findings can help guide implementation of COVID-19 vaccination in similar settings. |

## Preferred Reporting Items for Systematic reviews and Meta-Analyses extension for Scoping Reviews (PRISMA-ScR) Checklist

| SECTION                           | ITEM | PRISMA-ScR CHECKLIST ITEM                                                                                                                                                                                                                                                                                  | REPORTED ON PAGE #       |
|-----------------------------------|------|------------------------------------------------------------------------------------------------------------------------------------------------------------------------------------------------------------------------------------------------------------------------------------------------------------|--------------------------|
| <b>TITLE</b>                      |      |                                                                                                                                                                                                                                                                                                            |                          |
| Title                             | 1    | Identify the report as a scoping review.                                                                                                                                                                                                                                                                   | 1                        |
| <b>ABSTRACT</b>                   |      |                                                                                                                                                                                                                                                                                                            |                          |
| Structured summary                | 2    | Provide a structured summary that includes (as applicable): background, objectives, eligibility criteria, sources of evidence, charting methods, results, and conclusions that relate to the review questions and objectives.                                                                              | 2-3                      |
| <b>INTRODUCTION</b>               |      |                                                                                                                                                                                                                                                                                                            |                          |
| Rationale                         | 3    | Describe the rationale for the review in the context of what is already known. Explain why the review questions/objectives lend themselves to a scoping review approach.                                                                                                                                   | 4-7                      |
| Objectives                        | 4    | Provide an explicit statement of the questions and objectives being addressed with reference to their key elements (e.g., population or participants, concepts, and context) or other relevant key elements used to conceptualize the review questions and/or objectives.                                  | 7-8                      |
| <b>METHODS</b>                    |      |                                                                                                                                                                                                                                                                                                            |                          |
| Protocol and registration         | 5    | Indicate whether a review protocol exists; state if and where it can be accessed (e.g., a Web address); and if available, provide registration information, including the registration number.                                                                                                             | 8                        |
| Eligibility criteria              | 6    | Specify characteristics of the sources of evidence used as eligibility criteria (e.g., years considered, language, and publication status), and provide a rationale.                                                                                                                                       | 8-9                      |
| Information sources*              | 7    | Describe all information sources in the search (e.g., databases with dates of coverage and contact with authors to identify additional sources), as well as the date the most recent search was executed.                                                                                                  | 10                       |
| Search                            | 8    | Present the full electronic search strategy for at least 1 database, including any limits used, such that it could be repeated.                                                                                                                                                                            | 10, Supplementary file 1 |
| Selection of sources of evidence† | 9    | State the process for selecting sources of evidence (i.e., screening and eligibility) included in the scoping review.                                                                                                                                                                                      | 10                       |
| Data charting process‡            | 10   | Describe the methods of charting data from the included sources of evidence (e.g., calibrated forms or forms that have been tested by the team before their use, and whether data charting was done independently or in duplicate) and any processes for obtaining and confirming data from investigators. | 10                       |
| Data items                        | 11   | List and define all variables for which data were sought and any assumptions and simplifications made.                                                                                                                                                                                                     | 9-10                     |
| Critical appraisal of individual  | 12   | If done, provide a rationale for conducting a critical appraisal of included sources of evidence; describe                                                                                                                                                                                                 | n/a                      |



| SECTION                                       | ITEM | PRISMA-ScR CHECKLIST ITEM                                                                                                                                                                       | REPORTED ON PAGE # |
|-----------------------------------------------|------|-------------------------------------------------------------------------------------------------------------------------------------------------------------------------------------------------|--------------------|
| sources of evidence§                          |      | the methods used and how this information was used in any data synthesis (if appropriate).                                                                                                      |                    |
| Synthesis of results                          | 13   | Describe the methods of handling and summarizing the data that were charted.                                                                                                                    | 9-10               |
| <b>RESULTS</b>                                |      |                                                                                                                                                                                                 |                    |
| Selection of sources of evidence              | 14   | Give numbers of sources of evidence screened, assessed for eligibility, and included in the review, with reasons for exclusions at each stage, ideally using a flow diagram.                    | 11                 |
| Characteristics of sources of evidence        | 15   | For each source of evidence, present characteristics for which data were charted and provide the citations.                                                                                     | 11-19              |
| Critical appraisal within sources of evidence | 16   | If done, present data on critical appraisal of included sources of evidence (see item 12).                                                                                                      | n/a                |
| Results of individual sources of evidence     | 17   | For each included source of evidence, present the relevant data that were charted that relate to the review questions and objectives.                                                           | 11-19              |
| Synthesis of results                          | 18   | Summarize and/or present the charting results as they relate to the review questions and objectives.                                                                                            | 11-19              |
| <b>DISCUSSION</b>                             |      |                                                                                                                                                                                                 |                    |
| Summary of evidence                           | 19   | Summarize the main results (including an overview of concepts, themes, and types of evidence available), link to the review questions and objectives, and consider the relevance to key groups. | 19-22              |
| Limitations                                   | 20   | Discuss the limitations of the scoping review process.                                                                                                                                          | 21-22              |
| Conclusions                                   | 21   | Provide a general interpretation of the results with respect to the review questions and objectives, as well as potential implications and/or next steps.                                       | 22-23              |
| <b>FUNDING</b>                                |      |                                                                                                                                                                                                 |                    |
| Funding                                       | 22   | Describe sources of funding for the included sources of evidence, as well as sources of funding for the scoping review. Describe the role of the funders of the scoping review.                 | 23                 |

JB1 = Joanna Briggs Institute; PRISMA-ScR = Preferred Reporting Items for Systematic reviews and Meta-Analyses extension for Scoping Reviews.

\* Where *sources of evidence* (see second footnote) are compiled from, such as bibliographic databases, social media platforms, and Web sites.

† A more inclusive/heterogeneous term used to account for the different types of evidence or data sources (e.g., quantitative and/or qualitative research, expert opinion, and policy documents) that may be eligible in a scoping review as opposed to only studies. This is not to be confused with *information sources* (see first footnote).

‡ The frameworks by Arksey and O'Malley (6) and Levac and colleagues (7) and the JBI guidance (4, 5) refer to the process of data extraction in a scoping review as data charting.

§ The process of systematically examining research evidence to assess its validity, results, and relevance before using it to inform a decision. This term is used for items 12 and 19 instead of "risk of bias" (which is more applicable to systematic reviews of interventions) to include and acknowledge the various sources of evidence that may be used in a scoping review (e.g., quantitative and/or qualitative research, expert opinion, and policy document).

From: Tricco AC, Lillie E, Zarin W, O'Brien KK, Colquhoun H, Levac D, et al. PRISMA Extension for Scoping Reviews (PRISMA-ScR): Checklist and Explanation. *Ann Intern Med.* 2018;169:467–473. doi: 10.7326/M18-0850.



St. Michael's

Inspired Care.  
Inspiring Science.

For peer review only - <http://bmjopen.bmj.com/site/about/guidelines.xhtml>
